# Supplementary material for: Identifying Infliximab‐ (IFX‐) Responsive Blood Signatures for the Treatment of Rheumatoid Arthritis
Source: Hindawi journal article supplement (doi:10.1155/2021/5556784), 2021-01-01
Supplement: f1 [file 5556784.f1.zip]

Archive with 3 entries (3 files):
- 5556784.f1.pdf
- 5556784.f2.pdf
- 5556784.f3.pdf
