# Supplementary material for: Identifying Infliximab‐ (IFX‐) Responsive Blood Signatures for the Treatment of Rheumatoid Arthritis
Source: Hindawi journal article supplement (doi:10.1155/2021/5556784), 2021-01-01
Supplement: f1 [file 5556784.f1.zip]

| Attribute    | RI     |
|--------------|--------|
| DISC1        | 0.0506 |
| SAMD11       | 0.0410 |
| EID2B        | 0.0345 |
| LOC100506469 | 0.0273 |
| LOC390705    | 0.0261 |
| NTS          | 0.0257 |
| STAT2        | 0.0233 |
| LOC100505679 | 0.0209 |
| HELZ         | 0.0198 |
| SUMO2        | 0.0190 |
| KRT83        | 0.0183 |
| OR51Q1       | 0.0177 |
| KCTD10       | 0.0165 |
| SNRPD3       | 0.0160 |
| CYP1B1-AS1   | 0.0159 |
| MRVI1        | 0.0155 |
| TPRG1        | 0.0152 |
| PRDM7        | 0.0150 |
| ACER3        | 0.0137 |
| KLHL4        | 0.0131 |
| PEX13        | 0.0128 |
| ITGAE        | 0.0126 |
| NDUFA2       | 0.0125 |
| TRIM22       | 0.0124 |
| EXD3         | 0.0124 |
| TACO1        | 0.0123 |
| PSMB4        | 0.0123 |
| PGC          | 0.0123 |
| OSTCP1       | 0.0119 |
| CYB5A        | 0.0116 |
| 4-Sep        | 0.0113 |
| SERPINA7     | 0.0111 |
| LPPR4        | 0.0106 |
| CPS1-IT1     | 0.0103 |
| GRAP2        | 0.0102 |
| SYCE3        | 0.0102 |
| TOM1         | 0.0101 |
| WDR41        | 0.0100 |
| CXorf36      | 0.0100 |
| PCGF3        | 0.0098 |
| ZNF827       | 0.0096 |
| MAPKAPK5     | 0.0092 |
| SLC50A1      | 0.0090 |
| FIGN         | 0.0089 |
| MRPS36       | 0.0089 |

|              |        |
|--------------|--------|
| MORN3        | 0.0087 |
| QTRTD1       | 0.0086 |
| SAA4         | 0.0085 |
| STXBP4       | 0.0084 |
| SCD5         | 0.0083 |
| LOC643441    | 0.0082 |
| XAGE-4       | 0.0081 |
| L3MBTL4      | 0.0078 |
| SLC17A3      | 0.0078 |
| MPHOSPH8     | 0.0076 |
| FRK          | 0.0076 |
| AMZ2         | 0.0075 |
| WDR67        | 0.0075 |
| ANP32C       | 0.0074 |
| LOC221442    | 0.0074 |
| LOC100131283 | 0.0072 |
| SMG5         | 0.0071 |
| DSP          | 0.0071 |
| CRH          | 0.0071 |
| GABRB3       | 0.0071 |
| MCEE         | 0.0070 |
| RNF148       | 0.0070 |
| KIAA0895L    | 0.0069 |
| LINC00165    | 0.0068 |
| POLH         | 0.0067 |
| MRPL53       | 0.0067 |
| PEX11B       | 0.0066 |
| FBXO40       | 0.0065 |
| SLED1        | 0.0064 |
| ZNF587       | 0.0064 |
| IRAK4        | 0.0063 |
| WIBG         | 0.0063 |
| SCFD2        | 0.0063 |
| C8orf40      | 0.0063 |
| LGALS8       | 0.0063 |
| MGC23284     | 0.0063 |
| C11orf70     | 0.0062 |
| CHD5         | 0.0061 |
| ST8SIA5      | 0.0061 |
| IL9R         | 0.0061 |
| STOML3       | 0.0060 |
| HOOK3        | 0.0060 |
| FDX1         | 0.0059 |
| UBL5         | 0.0059 |
| LOC338651    | 0.0058 |
| PLCB2        | 0.0058 |

|              |        |
|--------------|--------|
| C11orf48     | 0.0058 |
| PRLR         | 0.0058 |
| POGZ         | 0.0057 |
| WWC2         | 0.0057 |
| PRPF38A      | 0.0057 |
| RSPH10B      | 0.0056 |
| GCLM         | 0.0056 |
| POLR2C       | 0.0055 |
| RNF217       | 0.0055 |
| LOC440104    | 0.0055 |
| RBM3         | 0.0055 |
| PYY          | 0.0054 |
| ZSWIM1       | 0.0054 |
| MGC27345     | 0.0054 |
| TRIM53P      | 0.0054 |
| C1QB         | 0.0054 |
| SHISA5       | 0.0053 |
| VWF          | 0.0053 |
| CAPN8        | 0.0053 |
| CHRNA6       | 0.0052 |
| RPL23AP82    | 0.0052 |
| ZNF800       | 0.0052 |
| ALOX12B      | 0.0052 |
| LOC100653060 | 0.0052 |
| EGR4         | 0.0051 |
| MYL9         | 0.0051 |
| C14orf167    | 0.0051 |
| ZBTB34       | 0.0051 |
| SLC35D1      | 0.0051 |
| SETD7        | 0.0051 |
| TRIM17       | 0.0051 |
| C4BPB        | 0.0051 |
| FGF8         | 0.0050 |
| IFNAR2       | 0.0050 |
| PCDHA9       | 0.0050 |
| VPS13B       | 0.0050 |
| UHRF1        | 0.0049 |
| HORMAD2      | 0.0049 |
| LOC100292680 | 0.0049 |
| PFKFB4       | 0.0048 |
| GNG4         | 0.0048 |
| LOC100287177 | 0.0048 |
| IL15         | 0.0048 |
| RGS12        | 0.0048 |
| TRAF3        | 0.0047 |
| STOM         | 0.0047 |

|              |        |
|--------------|--------|
| KLHL35       | 0.0047 |
| CNTRL        | 0.0047 |
| DDX59        | 0.0047 |
| IL36G        | 0.0046 |
| METTTL21A    | 0.0046 |
| OBP2B        | 0.0046 |
| CBX7         | 0.0046 |
| FCGR3B       | 0.0046 |
| KRT2         | 0.0046 |
| DLG3         | 0.0046 |
| CFL2         | 0.0045 |
| RNF44        | 0.0045 |
| PLSCR1       | 0.0045 |
| GJC1         | 0.0045 |
| LOC400752    | 0.0045 |
| PRH2         | 0.0044 |
| AMD1         | 0.0044 |
| KCTD6        | 0.0044 |
| TSC22D1      | 0.0044 |
| LOC440173    | 0.0044 |
| LOC100507537 | 0.0044 |
| SH3RF1       | 0.0044 |
| ANKRD50      | 0.0043 |
| BCL2L12      | 0.0043 |
| HSD17B14     | 0.0043 |
| C11orf85     | 0.0043 |
| JPH1         | 0.0043 |
| C12orf42     | 0.0042 |
| FAP          | 0.0042 |
| FCRL4        | 0.0042 |
| LOC100505697 | 0.0042 |
| ZNF416       | 0.0042 |
| TMC3         | 0.0042 |
| LGALS12      | 0.0042 |
| ALG2         | 0.0042 |
| 7-Sep        | 0.0041 |
| KCNRG        | 0.0041 |
| ASZ1         | 0.0041 |
| ENOX2        | 0.0041 |
| TPRKB        | 0.0041 |
| CCDC112      | 0.0041 |
| CGN          | 0.0040 |
| FAM102B      | 0.0040 |
| CDCP1        | 0.0040 |
| CRISPLD1     | 0.0040 |
| C17orf81     | 0.0040 |

|              |        |
|--------------|--------|
| PRAME        | 0.0040 |
| APLNR        | 0.0040 |
| WDR60        | 0.0040 |
| FAM106CP     | 0.0039 |
| PAXIP1       | 0.0039 |
| HIST1H2BE    | 0.0039 |
| SYK          | 0.0039 |
| SPP2         | 0.0039 |
| IL29         | 0.0039 |
| SH3RF3       | 0.0038 |
| PNRC1        | 0.0038 |
| TXNIP        | 0.0038 |
| SLA          | 0.0038 |
| LOC100128840 | 0.0038 |
| HEY2         | 0.0038 |
| VAMP1        | 0.0038 |
| STRADA       | 0.0037 |
| VWA3B        | 0.0037 |
| AIF1         | 0.0037 |
| GSG1L        | 0.0037 |
| N4BP2L2      | 0.0037 |
| IFITM3       | 0.0037 |
| C18orf25     | 0.0037 |
| SCRN3        | 0.0037 |
| CPSF7        | 0.0037 |
| SNX10        | 0.0037 |
| ENTPD4       | 0.0037 |
| SLC1A3       | 0.0037 |
| PIAS2        | 0.0037 |
| MBD3L1       | 0.0037 |
| LIPC         | 0.0036 |
| NR2F1        | 0.0036 |
| R3HDM1       | 0.0036 |
| HFE          | 0.0036 |
| SPPL2A       | 0.0036 |
| ISLR2        | 0.0036 |
| LOC84931     | 0.0036 |
| DHCR7        | 0.0036 |
| AGPHD1       | 0.0036 |
| C12orf24     | 0.0036 |
| IP6K3        | 0.0035 |
| LOC100272228 | 0.0035 |
| C10orf116    | 0.0035 |
| ZNF670       | 0.0035 |
| TMEM14B      | 0.0035 |
| ANKRD22      | 0.0035 |

|              |        |
|--------------|--------|
| RPS27        | 0.0035 |
| OR7E14P      | 0.0035 |
| NPY5R        | 0.0035 |
| LOC349196    | 0.0035 |
| WDR20        | 0.0035 |
| C22orf33     | 0.0035 |
| ABCA4        | 0.0034 |
| EIF2S3       | 0.0034 |
| LOC344595    | 0.0034 |
| C1orf109     | 0.0034 |
| CBX3P2       | 0.0034 |
| CCNH         | 0.0034 |
| DNAH3        | 0.0034 |
| POTEE        | 0.0034 |
| ZNF329       | 0.0034 |
| ECSCR        | 0.0033 |
| DNAJC1       | 0.0033 |
| BMP6         | 0.0033 |
| LOC100505792 | 0.0033 |
| LOC100505794 | 0.0033 |
| DYNLRB2      | 0.0033 |
| LOC100505657 | 0.0032 |
| MYLIP        | 0.0032 |
| C8orf44      | 0.0032 |
| FRG1B        | 0.0032 |
| ZC3H13       | 0.0032 |
| SLC6A19      | 0.0032 |
| KIR2DS1      | 0.0032 |
| OCIAD1       | 0.0032 |
| EIF3K        | 0.0032 |
| TUG1         | 0.0032 |
| HS6ST3       | 0.0032 |
| NCR3         | 0.0032 |
| KLK10        | 0.0032 |
| SUV420H2     | 0.0032 |
| CCNL1        | 0.0032 |
| PTPRR        | 0.0032 |
| LINC00158    | 0.0032 |
| C16orf45     | 0.0032 |
| LOC100129831 | 0.0031 |
| LCN2         | 0.0031 |
| PPAT         | 0.0031 |
| MDF1         | 0.0031 |
| ILK          | 0.0031 |
| NOXO1        | 0.0031 |
| NXF5         | 0.0031 |

|           |        |
|-----------|--------|
| C6orf97   | 0.0031 |
| LOC149351 | 0.0031 |
| AMPD3     | 0.0030 |
| C12orf57  | 0.0030 |
| ZDHHC7    | 0.0030 |
| OCLM      | 0.0030 |
| DNAH14    | 0.0030 |
| CLDN22    | 0.0030 |
| ZNF100    | 0.0030 |
| LCN1      | 0.0030 |
| FAM19A4   | 0.0030 |
| GRK5      | 0.0030 |
| HAGH      | 0.0030 |
| OTX1      | 0.0030 |
| SCNN1D    | 0.0030 |
| TAGAP     | 0.0030 |
| C1orf174  | 0.0030 |
| SHPK      | 0.0029 |
| PRKCI     | 0.0029 |
| LOC727869 | 0.0029 |
| COL3A1    | 0.0029 |
| TMEM55B   | 0.0029 |
| FAM26D    | 0.0029 |
| CD274     | 0.0029 |
| ZMYND15   | 0.0029 |
| CHCHD1    | 0.0029 |
| SLC20A2   | 0.0029 |
| IFITM2    | 0.0029 |
| TRIM34    | 0.0029 |
| 10-Mar    | 0.0028 |
| HADHB     | 0.0028 |
| ABTB2     | 0.0028 |
| CLDN4     | 0.0028 |
| PCCA      | 0.0028 |
| RADIL     | 0.0028 |
| TIMP3     | 0.0028 |
| ZAR1      | 0.0028 |
| DND1      | 0.0028 |
| ACOT9     | 0.0028 |
| C21orf81  | 0.0028 |
| HCN2      | 0.0028 |
| MPHOSPH6  | 0.0028 |
| ZNF542    | 0.0028 |
| COMP      | 0.0028 |
| SPATA9    | 0.0028 |
| SRPR      | 0.0028 |

|              |        |
|--------------|--------|
| ZNF605       | 0.0028 |
| CHSY1        | 0.0028 |
| LOC729652    | 0.0027 |
| KIAA0664     | 0.0027 |
| PRDX3        | 0.0027 |
| PNMA6A       | 0.0027 |
| C8B          | 0.0027 |
| PTRHD1       | 0.0027 |
| ZNF22        | 0.0027 |
| PDC          | 0.0027 |
| SH2D5        | 0.0027 |
| ANKRD46      | 0.0027 |
| CHORDC1      | 0.0026 |
| PARP2        | 0.0026 |
| TMED4        | 0.0026 |
| GPX1         | 0.0026 |
| TAF4         | 0.0026 |
| MYEOV2       | 0.0026 |
| SLC30A3      | 0.0026 |
| ASMT         | 0.0026 |
| CXCR2P1      | 0.0026 |
| REV1         | 0.0026 |
| PATE1        | 0.0026 |
| PRAM1        | 0.0025 |
| DHRS7C       | 0.0025 |
| KRTAP8-1     | 0.0025 |
| FNDC5        | 0.0025 |
| PON2         | 0.0025 |
| ZNF397       | 0.0025 |
| BARX2        | 0.0025 |
| LMNB1        | 0.0025 |
| TSSK4        | 0.0025 |
| ID2          | 0.0025 |
| CCDC144NL    | 0.0025 |
| MTTP         | 0.0025 |
| COX7B2       | 0.0025 |
| OR4C1P       | 0.0025 |
| LOC100128398 | 0.0025 |
| MEX3A        | 0.0025 |
| GEMIN7       | 0.0025 |
| GPR20        | 0.0025 |
| MXRA5        | 0.0025 |
| PRPF4        | 0.0025 |
| HSD17B2      | 0.0025 |
| NEXN-AS1     | 0.0025 |
| EDN1         | 0.0025 |



|              |        |
|--------------|--------|
| C14orf55     | 0.0024 |
| CDH15        | 0.0024 |
| LOC100507362 | 0.0024 |
| RBMS3        | 0.0024 |
| CFLAR        | 0.0024 |
| C2orf28      | 0.0024 |
| NNAT         | 0.0024 |
| FAM8A1       | 0.0024 |
| ST5          | 0.0024 |
| LZIC         | 0.0024 |
| GXYLT1       | 0.0024 |
| C6orf70      | 0.0024 |
| CNTN6        | 0.0024 |
| LOC440288    | 0.0024 |
| UGT2B11      | 0.0024 |
| LMNA         | 0.0024 |
| TAS2R10      | 0.0024 |
| KIF16B       | 0.0024 |
| RPS17        | 0.0024 |
| CAMTA2       | 0.0024 |
| PSTK         | 0.0024 |
| KBTBD11      | 0.0024 |
| LOC100505964 | 0.0024 |
| TLN2         | 0.0024 |
| ZC3H3        | 0.0023 |
| GTPBP5       | 0.0023 |
| ADORA2B      | 0.0023 |
| RAD9B        | 0.0023 |
| HBB          | 0.0023 |
| PDE2A        | 0.0023 |
| CDKN2B       | 0.0023 |
| LOC100129917 | 0.0023 |
| NFKBIA       | 0.0023 |
| FCN2         | 0.0023 |
| C1orf51      | 0.0023 |
| ZW10         | 0.0023 |
| FUT3         | 0.0023 |
| GPC3         | 0.0023 |
| DCUN1D2      | 0.0023 |
| TNFRSF10D    | 0.0023 |
| GTF2H2D      | 0.0023 |
| LRRC6        | 0.0023 |
| RCHY1        | 0.0023 |
| C19orf75     | 0.0023 |
| NME9         | 0.0023 |
| B3GAT2       | 0.0023 |

|              |        |
|--------------|--------|
| MED10        | 0.0023 |
| COL2A1       | 0.0023 |
| ANKIB1       | 0.0023 |
| SLC6A12      | 0.0023 |
| MAP2K7       | 0.0023 |
| DOC2B        | 0.0023 |
| MTL5         | 0.0023 |
| TULP4        | 0.0023 |
| ETNK2        | 0.0022 |
| C11orf74     | 0.0022 |
| FCGR1B       | 0.0022 |
| PCDH12       | 0.0022 |
| AMN1         | 0.0022 |
| ADD3         | 0.0022 |
| IL22         | 0.0022 |
| SH3KBP1      | 0.0022 |
| SULT1C2      | 0.0022 |
| RPS15        | 0.0022 |
| TIGD2        | 0.0022 |
| HPGD         | 0.0022 |
| SDC1         | 0.0022 |
| C6orf123     | 0.0022 |
| C11orf35     | 0.0022 |
| VEGFA        | 0.0022 |
| TXLNB        | 0.0022 |
| CCND3        | 0.0022 |
| ACTR5        | 0.0022 |
| RPL39        | 0.0022 |
| LRRC8B       | 0.0022 |
| SDHAF2       | 0.0022 |
| NMU          | 0.0022 |
| LOC401397    | 0.0022 |
| NIPSNAP3A    | 0.0022 |
| LENEP        | 0.0022 |
| CDCA8        | 0.0022 |
| SGK2         | 0.0022 |
| NR3C1        | 0.0022 |
| SAV1         | 0.0022 |
| MAGT1        | 0.0022 |
| B3GNT6       | 0.0022 |
| EIF3H        | 0.0021 |
| SERF2        | 0.0021 |
| LOC100507280 | 0.0021 |
| LSM14B       | 0.0021 |
| TUBB4A       | 0.0021 |
| TMEM9B       | 0.0021 |

|              |        |
|--------------|--------|
| CNN1         | 0.0021 |
| AKR1D1       | 0.0021 |
| SLC29A2      | 0.0021 |
| RPL12        | 0.0021 |
| TEAD2        | 0.0021 |
| HBA2         | 0.0021 |
| PCF11        | 0.0021 |
| CCR8         | 0.0021 |
| ARMCX3       | 0.0021 |
| TSPAN33      | 0.0021 |
| POLA1        | 0.0021 |
| KLF1         | 0.0021 |
| C19orf21     | 0.0021 |
| ZNF560       | 0.0021 |
| KCNMA1       | 0.0021 |
| ATP8B3       | 0.0021 |
| CXorf21      | 0.0021 |
| SGK494       | 0.0021 |
| FAM71D       | 0.0021 |
| GTSF1L       | 0.0021 |
| LOC613126    | 0.0021 |
| ENO1-AS1     | 0.0021 |
| FADS3        | 0.0021 |
| D4S234E      | 0.0021 |
| STRAP        | 0.0021 |
| HEY1         | 0.0020 |
| ARHGAP27     | 0.0020 |
| PRCC         | 0.0020 |
| BCMO1        | 0.0020 |
| FN1          | 0.0020 |
| FAM9A        | 0.0020 |
| ABHD16B      | 0.0020 |
| C2orf70      | 0.0020 |
| KIAA1324     | 0.0020 |
| DKK2         | 0.0020 |
| POM121L9P    | 0.0020 |
| LINC00311    | 0.0020 |
| LOC100507418 | 0.0020 |
| UBA6         | 0.0020 |
| HTR3B        | 0.0020 |
| STK32B       | 0.0020 |
| RNF167       | 0.0020 |
| TBC1D3P2     | 0.0020 |
| CELA1        | 0.0020 |
| DACT2        | 0.0020 |
| H1FOO        | 0.0020 |

|              |        |
|--------------|--------|
| DARS2        | 0.0020 |
| CSF2RB       | 0.0020 |
| RBFOX3       | 0.0020 |
| NFASC        | 0.0020 |
| FES          | 0.0020 |
| ASRGL1       | 0.0020 |
| CT47B1       | 0.0020 |
| ELAVL4       | 0.0020 |
| ACAD10       | 0.0020 |
| LRRC46       | 0.0020 |
| SUFU         | 0.0020 |
| ZBTB4        | 0.0020 |
| CHL1         | 0.0020 |
| ZG16B        | 0.0020 |
| TNKS1BP1     | 0.0020 |
| LOC100292909 | 0.0020 |
| RAD51C       | 0.0020 |
| ZNF25        | 0.0020 |
| P2RY14       | 0.0020 |
| LOC729732    | 0.0020 |
| TCHH         | 0.0020 |
| TNFSF8       | 0.0020 |
| ZC3HAV1      | 0.0020 |
| AMELX        | 0.0020 |
| PSG11        | 0.0019 |
| DEM1         | 0.0019 |
| LOC100506778 | 0.0019 |
| KIAA0226     | 0.0019 |
| HLTF         | 0.0019 |
| RPS29        | 0.0019 |
| UPB1         | 0.0019 |
| CASP4        | 0.0019 |
| C14orf169    | 0.0019 |
| TBP          | 0.0019 |
| RNF17        | 0.0019 |
| NEU3         | 0.0019 |
| AMMECR1      | 0.0019 |
| C3orf45      | 0.0019 |
| SYTL1        | 0.0019 |
| CSRP2        | 0.0019 |
| KCNJ2        | 0.0019 |
| SAP18        | 0.0019 |
| IFIT3        | 0.0019 |
| C7orf41      | 0.0019 |
| KCNH7        | 0.0019 |
| CIT          | 0.0019 |

|              |        |
|--------------|--------|
| EEPD1        | 0.0019 |
| SCAMP1       | 0.0019 |
| ZNF189       | 0.0019 |
| LINC00470    | 0.0019 |
| OSBPL9       | 0.0019 |
| NUF2         | 0.0019 |
| FXYD4        | 0.0019 |
| RPS6KA2      | 0.0019 |
| ZNF235       | 0.0019 |
| SLCO1A2      | 0.0019 |
| CNBD1        | 0.0019 |
| PADI4        | 0.0019 |
| STBD1        | 0.0019 |
| TAT          | 0.0019 |
| OAZ1         | 0.0019 |
| PPP1R3B      | 0.0019 |
| PRNP         | 0.0019 |
| APOL4        | 0.0019 |
| HLA-F-AS1    | 0.0019 |
| GPR61        | 0.0019 |
| APCDD1       | 0.0019 |
| PIP5K1A      | 0.0018 |
| C15orf39     | 0.0018 |
| DEF8         | 0.0018 |
| MERTK        | 0.0018 |
| MAB21L1      | 0.0018 |
| GTF2H5       | 0.0018 |
| NUCB1        | 0.0018 |
| SMC1B        | 0.0018 |
| LOC644242    | 0.0018 |
| RPL38        | 0.0018 |
| USMG5        | 0.0018 |
| YPEL3        | 0.0018 |
| CCNG2        | 0.0018 |
| LOC100506523 | 0.0018 |
| LOC388796    | 0.0018 |
| LRP5         | 0.0018 |
| GPR146       | 0.0018 |
| C1orf63      | 0.0018 |
| COX6B1       | 0.0018 |
| KCNG4        | 0.0018 |
| FGFBP3       | 0.0018 |
| S1PR1        | 0.0018 |
| GGTA1P       | 0.0018 |
| IFITM1       | 0.0018 |
| CHMP4B       | 0.0018 |

|              |        |
|--------------|--------|
| MLL3         | 0.0018 |
| REEP4        | 0.0018 |
| SLC5A12      | 0.0018 |
| FMO5         | 0.0018 |
| TRIML1       | 0.0018 |
| LOC728431    | 0.0018 |
| NLGN4Y       | 0.0018 |
| OS9          | 0.0018 |
| DDX60L       | 0.0018 |
| MYO6         | 0.0018 |
| MCPH1        | 0.0018 |
| SLC6A1       | 0.0018 |
| CXCR2        | 0.0018 |
| KIAA2018     | 0.0018 |
| PDE6G        | 0.0018 |
| PDAP1        | 0.0018 |
| ELTD1        | 0.0018 |
| SRGAP1       | 0.0018 |
| WNT1         | 0.0018 |
| LOC100131434 | 0.0018 |
| CCHCR1       | 0.0018 |
| LOC339894    | 0.0018 |
| CPZ          | 0.0018 |
| MIA3         | 0.0018 |
| MTERFD3      | 0.0018 |
| NLRC5        | 0.0018 |
| FKBP1A       | 0.0018 |
| PARP14       | 0.0018 |
| ANKRD29      | 0.0018 |
| ADCY9        | 0.0018 |
| RHOXF1       | 0.0018 |
| TRIM69       | 0.0018 |
| FYB          | 0.0018 |
| PROS1        | 0.0018 |
| KLK4         | 0.0018 |
| RPAIN        | 0.0017 |
| INTS2        | 0.0017 |
| TAP1         | 0.0017 |
| EP300        | 0.0017 |
| UTS2D        | 0.0017 |
| COMMD3       | 0.0017 |
| UNC93A       | 0.0017 |
| PROK2        | 0.0017 |
| GPR113       | 0.0017 |
| DNAJC21      | 0.0017 |
| BEST3        | 0.0017 |

|              |        |
|--------------|--------|
| CD247        | 0.0017 |
| D2HGDH       | 0.0017 |
| TLX2         | 0.0017 |
| SPATA7       | 0.0017 |
| TUBB3        | 0.0017 |
| HAP1         | 0.0017 |
| CTSC         | 0.0017 |
| CWF19L1      | 0.0017 |
| GDF10        | 0.0017 |
| CDNF         | 0.0017 |
| MNS1         | 0.0017 |
| IDI2-AS1     | 0.0017 |
| NDUFC2       | 0.0017 |
| BAG1         | 0.0017 |
| PRR4         | 0.0017 |
| C12orf35     | 0.0017 |
| GRB14        | 0.0017 |
| DCAF4L2      | 0.0017 |
| RGS4         | 0.0017 |
| COL5A3       | 0.0017 |
| TTN          | 0.0017 |
| CAPSL        | 0.0017 |
| MLLT4        | 0.0017 |
| B4GALNT3     | 0.0017 |
| REG4         | 0.0017 |
| SRSF10       | 0.0017 |
| CAPN6        | 0.0017 |
| LINC00339    | 0.0017 |
| PARP9        | 0.0017 |
| FYCO1        | 0.0017 |
| GBP2         | 0.0017 |
| CETN1        | 0.0017 |
| LOC100506190 | 0.0017 |
| RAB33A       | 0.0017 |
| LOC100505938 | 0.0017 |
| VRTN         | 0.0017 |
| LYPLAL1      | 0.0016 |
| LOC100133991 | 0.0016 |
| RIN3         | 0.0016 |
| PDCD2        | 0.0016 |
| LINC00308    | 0.0016 |
| MSR1         | 0.0016 |
| CTCF         | 0.0016 |
| SVOPL        | 0.0016 |
| ACRBP        | 0.0016 |
| SPANXB2      | 0.0016 |

|              |        |
|--------------|--------|
| WFIKKN2      | 0.0016 |
| ACAD8        | 0.0016 |
| IMPACT       | 0.0016 |
| PDE11A       | 0.0016 |
| DPY19L2P3    | 0.0016 |
| ARL1         | 0.0016 |
| MESP1        | 0.0016 |
| RPS7         | 0.0016 |
| FAM20A       | 0.0016 |
| TOB1         | 0.0016 |
| FUT1         | 0.0016 |
| UPF3A        | 0.0016 |
| FAM75A2      | 0.0016 |
| FAM163A      | 0.0016 |
| C9orf103     | 0.0016 |
| PRKACA       | 0.0016 |
| IFIH1        | 0.0016 |
| NUDT1        | 0.0016 |
| SCNN1B       | 0.0016 |
| RSPH9        | 0.0016 |
| SMCP         | 0.0016 |
| FANCC        | 0.0016 |
| MMP24        | 0.0016 |
| DNAH7        | 0.0016 |
| TPPP2        | 0.0016 |
| CES1P1       | 0.0016 |
| BTN3A2       | 0.0016 |
| ZNF345       | 0.0016 |
| ALG10        | 0.0016 |
| PDLIM1       | 0.0016 |
| UNC119B      | 0.0016 |
| PODNL1       | 0.0016 |
| ADCY2        | 0.0016 |
| ENY2         | 0.0016 |
| VWA1         | 0.0016 |
| C12orf47     | 0.0016 |
| LOC100508196 | 0.0016 |
| DUSP18       | 0.0016 |
| PTPRM        | 0.0016 |
| CCDC69       | 0.0016 |
| AKIRIN2-AS1  | 0.0016 |
| PEAR1        | 0.0016 |
| SNCG         | 0.0016 |
| CRY1         | 0.0016 |
| LYPD6        | 0.0016 |
| SLC11A2      | 0.0016 |



|           |        |
|-----------|--------|
| HAUS8     | 0.0016 |
| ZNF804A   | 0.0016 |
| OR51B2    | 0.0015 |
| ORF1      | 0.0015 |
| USP48     | 0.0015 |
| KIAA1199  | 0.0015 |
| VARs2     | 0.0015 |
| BOK       | 0.0015 |
| IL13RA2   | 0.0015 |
| IQCE      | 0.0015 |
| C8orf8    | 0.0015 |
| GOLGA5    | 0.0015 |
| PDK2      | 0.0015 |
| TMEM14C   | 0.0015 |
| CTSL1     | 0.0015 |
| KIAA1244  | 0.0015 |
| ZNF124    | 0.0015 |
| NDE1      | 0.0015 |
| ZNF789    | 0.0015 |
| WFDC2     | 0.0015 |
| TUSC2     | 0.0015 |
| ARSK      | 0.0015 |
| ROMO1     | 0.0015 |
| SLC16A5   | 0.0015 |
| SIGLECP3  | 0.0015 |
| FABP6     | 0.0015 |
| XDH       | 0.0015 |
| JAKMIP3   | 0.0015 |
| C16orf70  | 0.0015 |
| MUTYH     | 0.0015 |
| CLCNKB    | 0.0015 |
| CLIP4     | 0.0015 |
| LOC219731 | 0.0015 |
| RPL37A    | 0.0015 |
| SATB2     | 0.0015 |
| TYR       | 0.0015 |
| MAP2K6    | 0.0015 |
| BCORP1    | 0.0015 |
| CGREF1    | 0.0015 |
| APOL6     | 0.0015 |
| IPCEF1    | 0.0015 |
| PSG7      | 0.0015 |
| FAM93B    | 0.0015 |
| PKNOX2    | 0.0015 |
| KLF5      | 0.0015 |
| ACPL2     | 0.0015 |

|              |        |
|--------------|--------|
| SYTL2        | 0.0015 |
| ELL2         | 0.0015 |
| SCIN         | 0.0015 |
| EXOSC6       | 0.0015 |
| GNS          | 0.0015 |
| LSM1         | 0.0015 |
| CGNL1        | 0.0015 |
| BET1         | 0.0015 |
| NCOR1        | 0.0015 |
| LOC100129858 | 0.0015 |
| PFN4         | 0.0015 |
| STOML2       | 0.0015 |
| SOST         | 0.0015 |
| LTC4S        | 0.0015 |
| NANOG        | 0.0015 |
| NKX2-1       | 0.0015 |
| BLOC1S2      | 0.0015 |
| UBC          | 0.0015 |
| CDK5RAP2     | 0.0015 |
| C2orf85      | 0.0015 |
| C7orf30      | 0.0015 |
| LOC100505912 | 0.0014 |
| LAMP3        | 0.0014 |
| GADD45G      | 0.0014 |
| HTR3A        | 0.0014 |
| MAGOHB       | 0.0014 |
| FLJ42393     | 0.0014 |
| MFSD6L       | 0.0014 |
| CCNK         | 0.0014 |
| HTN1         | 0.0014 |
| ELF1         | 0.0014 |
| TSHZ1        | 0.0014 |
| UQCR11       | 0.0014 |
| ATP2B1       | 0.0014 |
| SAMD5        | 0.0014 |
| LOC100506516 | 0.0014 |
| DIP2B        | 0.0014 |
| FLJ36840     | 0.0014 |
| TTC35        | 0.0014 |
| HIST1H3F     | 0.0014 |
| RBP4         | 0.0014 |
| C10orf57     | 0.0014 |
| PCK2         | 0.0014 |
| RBM39        | 0.0014 |
| CABLES1      | 0.0014 |
| DDX19A       | 0.0014 |

|              |        |
|--------------|--------|
| PTH          | 0.0014 |
| RPL23A       | 0.0014 |
| TTC16        | 0.0014 |
| FLT4         | 0.0014 |
| SUSD1        | 0.0014 |
| MED19        | 0.0014 |
| IDO2         | 0.0014 |
| IFT88        | 0.0014 |
| SGIP1        | 0.0014 |
| VRK1         | 0.0014 |
| TFAP2A       | 0.0014 |
| STX6         | 0.0014 |
| PDZD3        | 0.0014 |
| LOC100505474 | 0.0014 |
| SLC9B1       | 0.0014 |
| LINC00238    | 0.0014 |
| RNASE1       | 0.0014 |
| C16orf52     | 0.0014 |
| CLCN5        | 0.0014 |
| NEK3         | 0.0014 |
| HIST1H4A     | 0.0014 |
| TDRD7        | 0.0014 |
| DDX53        | 0.0014 |
| HTR6         | 0.0014 |
| TET2         | 0.0014 |
| MECP2        | 0.0014 |
| SAGE1        | 0.0014 |
| PRKAR2B      | 0.0014 |
| TPR          | 0.0014 |
| PTRH2        | 0.0014 |
| NR1H4        | 0.0014 |
| DKFZp761E198 | 0.0014 |
| RBL1         | 0.0014 |
| LOC643783    | 0.0014 |
| IFIT2        | 0.0014 |
| ERO1LB       | 0.0013 |
| AAAS         | 0.0013 |
| RUNX2        | 0.0013 |
| GP1BB        | 0.0013 |
| KCNG2        | 0.0013 |
| CA6          | 0.0013 |
| AKR1B10      | 0.0013 |
| FER          | 0.0013 |
| PAPLN        | 0.0013 |
| MOCS1        | 0.0013 |
| SPOP         | 0.0013 |

|              |        |
|--------------|--------|
| LOC100507493 | 0.0013 |
| PEBP1        | 0.0013 |
| GSTM4        | 0.0013 |
| RPH3AL       | 0.0013 |
| SRGAP2       | 0.0013 |
| PTTG1IP      | 0.0013 |
| FAM9B        | 0.0013 |
| NLGN1        | 0.0013 |
| PPP1R15B     | 0.0013 |
| HIST1H2AJ    | 0.0013 |
| LGI2         | 0.0013 |
| PANX1        | 0.0013 |
| ARSI         | 0.0013 |
| SYCP3        | 0.0013 |
| TAS2R3       | 0.0013 |
| SRP9         | 0.0013 |
| CD207        | 0.0013 |
| C9orf102     | 0.0013 |
| NEU1         | 0.0013 |
| TSFM         | 0.0013 |
| TTC9C        | 0.0013 |
| RPL23AP7     | 0.0013 |
| CTTNBP2      | 0.0013 |
| LOC100499177 | 0.0013 |
| UNK          | 0.0013 |
| SNTG2        | 0.0013 |
| SIX1         | 0.0013 |
| SHISA2       | 0.0013 |
| WDR82        | 0.0013 |
| HNRNPL       | 0.0013 |
| NFE2L3       | 0.0013 |
| CWC15        | 0.0013 |
| S100A10      | 0.0013 |
| LOC440337    | 0.0013 |
| PRAC         | 0.0013 |
| BPMS         | 0.0013 |
| PTMA         | 0.0013 |
| MR1          | 0.0013 |
| CKS2         | 0.0013 |
| MLF1         | 0.0013 |
| LOC400456    | 0.0013 |
| SSPN         | 0.0013 |
| B4GALNT4     | 0.0013 |
| LOC100505663 | 0.0013 |
| RCOR1        | 0.0013 |
| CCDC155      | 0.0013 |

|              |        |
|--------------|--------|
| RFXANK       | 0.0013 |
| P2RY2        | 0.0013 |
| CDX4         | 0.0013 |
| GPR116       | 0.0013 |
| LOC202025    | 0.0013 |
| LOC100652973 | 0.0013 |
| JHDM1D       | 0.0013 |
| ANAPC11      | 0.0013 |
| CHTF18       | 0.0013 |
| HTR4         | 0.0013 |
| OSTalpha     | 0.0013 |
| S1PR3        | 0.0013 |
| SIGLEC7      | 0.0013 |
| C14orf162    | 0.0013 |
| CA2          | 0.0013 |
| C16orf7      | 0.0013 |
| TRIM6        | 0.0013 |
| USP35        | 0.0013 |
| ORAI1        | 0.0013 |
| GRHPR        | 0.0013 |
| ME1          | 0.0013 |
| C19orf80     | 0.0013 |
| TRIM25       | 0.0013 |
| GPR126       | 0.0013 |
| CLPB         | 0.0013 |
| CXCR1        | 0.0013 |
| C2orf61      | 0.0013 |
| PTP4A3       | 0.0013 |
| MAPK11       | 0.0013 |
| CDC42EP5     | 0.0013 |
| KCNH5        | 0.0013 |
| C19orf18     | 0.0013 |
| MLKL         | 0.0013 |
| KIAA1751     | 0.0013 |
| IL22RA2      | 0.0013 |
| ZNF281       | 0.0013 |
| TPSG1        | 0.0013 |
| APOLD1       | 0.0013 |
| FAM123A      | 0.0013 |
| ABCA12       | 0.0013 |
| MSLN         | 0.0013 |
| CCR4         | 0.0013 |
| FBLN5        | 0.0013 |
| ZNF688       | 0.0013 |
| PNPLA6       | 0.0013 |
| ZBTB44       | 0.0013 |

|              |        |
|--------------|--------|
| ABRA         | 0.0013 |
| TBPL1        | 0.0013 |
| ZNF645       | 0.0013 |
| TMTC4        | 0.0013 |
| COX7A2       | 0.0013 |
| MORN2        | 0.0013 |
| LOC100131662 | 0.0013 |
| CLDN10       | 0.0013 |
| TNNT3        | 0.0013 |
| TNRC6B       | 0.0013 |
| TSPAN17      | 0.0013 |
| GMPR2        | 0.0013 |
| CERS3        | 0.0013 |
| SUGT1P3      | 0.0013 |
| GCA          | 0.0013 |
| KRT82        | 0.0013 |
| APH1B        | 0.0013 |
| NBR2         | 0.0013 |
| CCDC144A     | 0.0013 |
| ZNF597       | 0.0012 |
| MTF1         | 0.0012 |
| CTAGE9       | 0.0012 |
| MGC13053     | 0.0012 |
| MSRB2        | 0.0012 |
| RICTOR       | 0.0012 |
| CLCA1        | 0.0012 |
| SPRED2       | 0.0012 |
| SCNM1        | 0.0012 |
| LINC00467    | 0.0012 |
| S100A5       | 0.0012 |
| GCNT3        | 0.0012 |
| VLDLR        | 0.0012 |
| DUSP14       | 0.0012 |
| HOXC4        | 0.0012 |
| NKAPL        | 0.0012 |
| ESPNL        | 0.0012 |
| ADAD1        | 0.0012 |
| SERPING1     | 0.0012 |
| LOC645513    | 0.0012 |
| NAA60        | 0.0012 |
| ANKRD20A5P   | 0.0012 |
| CLEC4A       | 0.0012 |
| ZNF251       | 0.0012 |
| PRRC2C       | 0.0012 |
| XIST         | 0.0012 |
| ECD          | 0.0012 |

|              |        |
|--------------|--------|
| ACADS        | 0.0012 |
| UBB          | 0.0012 |
| ZNF154       | 0.0012 |
| CSN1S1       | 0.0012 |
| MTMR9LP      | 0.0012 |
| C9orf100     | 0.0012 |
| LOC285389    | 0.0012 |
| CEACAM1      | 0.0012 |
| LOC100509683 | 0.0012 |
| IGFBP7       | 0.0012 |
| CENPV        | 0.0012 |
| GOLT1A       | 0.0012 |
| PHYHIPL      | 0.0012 |
| PRAMEL       | 0.0012 |
| RGNEF        | 0.0012 |
| POU4F2       | 0.0012 |
| PVRL4        | 0.0012 |
| RPS6KL1      | 0.0012 |
| HSD17B3      | 0.0012 |
| ATP5F1       | 0.0012 |
| FAM26E       | 0.0012 |
| PHYHIP       | 0.0012 |
| C20orf173    | 0.0012 |
| TMEM202      | 0.0012 |
| C16orf93     | 0.0012 |
| TECR         | 0.0012 |
| TTY20        | 0.0012 |
| GRHL1        | 0.0012 |
| MLIP         | 0.0012 |
| MCOLN1       | 0.0012 |
| CSAD         | 0.0012 |
| ELMO1        | 0.0012 |
| OR2W3        | 0.0012 |
| DIS3         | 0.0012 |
| CLDN19       | 0.0012 |
| SAP25        | 0.0012 |
| MAPK8        | 0.0012 |
| FAM98C       | 0.0012 |
| DMRTC2       | 0.0012 |
| LOC100287195 | 0.0012 |
| CRYBB2       | 0.0012 |
| LOC100506687 | 0.0012 |
| RALGAPB      | 0.0012 |
| ARR3         | 0.0012 |
| DSC2         | 0.0012 |
| NRP2         | 0.0012 |

|              |        |
|--------------|--------|
| CRTC1        | 0.0012 |
| TTL12        | 0.0012 |
| TTC32        | 0.0012 |
| MGST3        | 0.0012 |
| FLJ32063     | 0.0012 |
| MRPS11       | 0.0012 |
| STX2         | 0.0012 |
| HAAO         | 0.0012 |
| CRTC2        | 0.0012 |
| LOC100507637 | 0.0012 |
| YEATS2       | 0.0012 |
| HIST1H1C     | 0.0012 |
| CCDC74B      | 0.0012 |
| ELMOD2       | 0.0012 |
| PHEX         | 0.0012 |
| SMN2         | 0.0012 |
| POU4F3       | 0.0012 |
| ENPP5        | 0.0012 |
| PROCA1       | 0.0012 |
| NR2F6        | 0.0012 |
| PTPN3        | 0.0012 |
| CASP10       | 0.0012 |
| BMP8A        | 0.0012 |
| NAA38        | 0.0012 |
| HS3ST3A1     | 0.0011 |
| LOC100132661 | 0.0011 |
| LATS2        | 0.0011 |
| LRRC19       | 0.0011 |
| AR           | 0.0011 |
| PTPRN2       | 0.0011 |
| NMB          | 0.0011 |
| TMEM184B     | 0.0011 |
| GRIK2        | 0.0011 |
| PARVA        | 0.0011 |
| WDR87        | 0.0011 |
| THRA         | 0.0011 |
| C1orf70      | 0.0011 |
| PNN          | 0.0011 |
| TOMM6        | 0.0011 |
| MDH1         | 0.0011 |
| AWAT1        | 0.0011 |
| ACAP3        | 0.0011 |
| POTEG        | 0.0011 |
| MN1          | 0.0011 |
| LST1         | 0.0011 |
| HTR7         | 0.0011 |



|               |        |
|---------------|--------|
| FXYD5         | 0.0011 |
| ATG9A         | 0.0011 |
| GLYR1         | 0.0011 |
| CDC14A        | 0.0011 |
| MSH3          | 0.0011 |
| C8orf55       | 0.0011 |
| HBM           | 0.0011 |
| FAM167A       | 0.0011 |
| ZNF180        | 0.0011 |
| HLA-A         | 0.0011 |
| DBN1          | 0.0011 |
| SAMD7         | 0.0011 |
| C6orf204      | 0.0011 |
| GDAP1         | 0.0011 |
| PM20D1        | 0.0011 |
| CRTC3         | 0.0011 |
| OR1G1         | 0.0011 |
| SLC39A7       | 0.0011 |
| ROR1          | 0.0011 |
| CLUL1         | 0.0011 |
| C7orf13       | 0.0011 |
| SERPINA9      | 0.0011 |
| GALNTL2       | 0.0011 |
| RRP15         | 0.0011 |
| DKFZp761P0212 | 0.0011 |
| GATA4         | 0.0011 |
| HLA-B         | 0.0011 |
| EIF4A3        | 0.0011 |
| LOC100506926  | 0.0011 |
| BRCC3         | 0.0011 |
| KBTBD6        | 0.0011 |
| JPX           | 0.0011 |
| EXO1          | 0.0011 |
| EIF2AK3       | 0.0011 |
| LOC595101     | 0.0011 |
| SPDYE7P       | 0.0011 |
| PPM1E         | 0.0011 |
| PCDHGB8P      | 0.0011 |
| LOC100271722  | 0.0011 |
| SLC17A9       | 0.0011 |
| PUM1          | 0.0011 |
| FGF23         | 0.0011 |
| ZNF346        | 0.0011 |
| HIST1H1T      | 0.0011 |
| MRVI1-AS1     | 0.0011 |
| C21orf119     | 0.0011 |

|           |        |
|-----------|--------|
| FSHR      | 0.0011 |
| LRTM2     | 0.0011 |
| EPHA8     | 0.0011 |
| OCLN      | 0.0011 |
| ORMDL2    | 0.0011 |
| DLK1      | 0.0011 |
| GSDMC     | 0.0011 |
| LOC79015  | 0.0011 |
| KLRG2     | 0.0011 |
| C9orf4    | 0.0011 |
| HERC4     | 0.0011 |
| FBXO36    | 0.0011 |
| FBXO34    | 0.0011 |
| HPN       | 0.0011 |
| FABP3     | 0.0011 |
| PFDN5     | 0.0011 |
| CREB3L2   | 0.0011 |
| XYLT2     | 0.0011 |
| CEBPD     | 0.0011 |
| RAB3A     | 0.0011 |
| TRPC7     | 0.0011 |
| HNRNPU    | 0.0011 |
| ALPK1     | 0.0011 |
| NXF3      | 0.0011 |
| MAGEA8    | 0.0011 |
| C12orf62  | 0.0011 |
| C7orf44   | 0.0011 |
| TMEM141   | 0.0011 |
| ABLIM3    | 0.0011 |
| NAPSA     | 0.0011 |
| TMEM199   | 0.0011 |
| ANKRD7    | 0.0011 |
| RGL1      | 0.0011 |
| PSPH      | 0.0011 |
| NAPSB     | 0.0011 |
| SF3B1     | 0.0011 |
| DBNDD1    | 0.0011 |
| KRTAP4-6  | 0.0011 |
| ZDHHC17   | 0.0011 |
| SUZ12     | 0.0011 |
| MNAT1     | 0.0011 |
| LOC400655 | 0.0011 |
| TTY14     | 0.0011 |
| C21orf15  | 0.0011 |
| PDLIM5    | 0.0011 |
| UHMK1     | 0.0011 |

|              |        |
|--------------|--------|
| WNT5B        | 0.0011 |
| CCDC113      | 0.0011 |
| MYBPH        | 0.0011 |
| C19orf66     | 0.0011 |
| LOC100507312 | 0.0011 |
| DIAPH3       | 0.0011 |
| HCG18        | 0.0011 |
| LACE1        | 0.0011 |
| LOC100509213 | 0.0011 |
| SYVN1        | 0.0011 |
| ADAM11       | 0.0011 |
| SLC38A6      | 0.0011 |
| TMPO         | 0.0011 |
| DPY19L2P4    | 0.0011 |
| STXBP2       | 0.0011 |
| C2orf65      | 0.0011 |
| RNF216P1     | 0.0011 |
| C3orf25      | 0.0011 |
| LOC440300    | 0.0011 |
| LOC100240734 | 0.0011 |
| VAT1L        | 0.0010 |
| FITM1        | 0.0010 |
| CLCN2        | 0.0010 |
| PTPRB        | 0.0010 |
| REG1B        | 0.0010 |
| TSPAN32      | 0.0010 |
| HSPA1L       | 0.0010 |
| MSX2         | 0.0010 |
| ALG6         | 0.0010 |
| SSX8         | 0.0010 |
| ANO4         | 0.0010 |
| CDKAL1       | 0.0010 |
| MFNG         | 0.0010 |
| LOC100128818 | 0.0010 |
| ATG2B        | 0.0010 |
| BATF2        | 0.0010 |
| C7orf33      | 0.0010 |
| NTRK1        | 0.0010 |
| USF2         | 0.0010 |
| STK31        | 0.0010 |
| APPL2        | 0.0010 |
| BSPRY        | 0.0010 |
| HMGCLL1      | 0.0010 |
| CDC42        | 0.0010 |
| SPI1         | 0.0010 |
| LOC646576    | 0.0010 |

|              |        |
|--------------|--------|
| LOC389033    | 0.0010 |
| NECAB1       | 0.0010 |
| PRPF38B      | 0.0010 |
| TSEN54       | 0.0010 |
| NEIL1        | 0.0010 |
| CTSW         | 0.0010 |
| OPTN         | 0.0010 |
| KRTAP1-5     | 0.0010 |
| CTSF         | 0.0010 |
| LOC641467    | 0.0010 |
| AREG         | 0.0010 |
| ERVK13-1     | 0.0010 |
| ZNF80        | 0.0010 |
| GALNT14      | 0.0010 |
| OR51A7       | 0.0010 |
| EIF3M        | 0.0010 |
| FOXO3        | 0.0010 |
| IL19         | 0.0010 |
| FLJ34503     | 0.0010 |
| BAX          | 0.0010 |
| LRRC3        | 0.0010 |
| KLHDC10      | 0.0010 |
| LOC100506310 | 0.0010 |
| DNAJC22      | 0.0010 |
| NDST4        | 0.0010 |
| RNF149       | 0.0010 |
| LCE2B        | 0.0010 |
| ACTA2        | 0.0010 |
| PRINS        | 0.0010 |
| TMPRSS15     | 0.0010 |
| CXorf68      | 0.0010 |
| CSPP1        | 0.0010 |
| IL1B         | 0.0010 |
| CYCS         | 0.0010 |
| RGS9         | 0.0010 |
| SCYL1        | 0.0010 |
| IGFBP2       | 0.0010 |
| C8orf34      | 0.0010 |
| LOC643659    | 0.0010 |
| MFI2-AS1     | 0.0010 |
| DNAJC3       | 0.0010 |
| PSMD12       | 0.0010 |
| NRGN         | 0.0010 |
| DBT          | 0.0010 |
| C18orf26     | 0.0010 |
| FAM46D       | 0.0010 |

|              |        |
|--------------|--------|
| MREG         | 0.0010 |
| COMMD6       | 0.0010 |
| VENTX        | 0.0010 |
| TNFSF13B     | 0.0010 |
| HAS1         | 0.0010 |
| PCLO         | 0.0010 |
| ZWILCH       | 0.0010 |
| RPLP2        | 0.0010 |
| LOC100505771 | 0.0010 |
| MS4A4A       | 0.0010 |
| TFB2M        | 0.0010 |
| NID1         | 0.0010 |
| DERA         | 0.0010 |
| ETNK1        | 0.0010 |
| PBRM1        | 0.0010 |
| GLIPR1L1     | 0.0010 |
| OR5P2        | 0.0010 |
| OSCP1        | 0.0010 |
| SLC22A6      | 0.0010 |
| NCKIPSD      | 0.0010 |
| LOC728724    | 0.0010 |
| ARHGAP44     | 0.0010 |
| MALL         | 0.0010 |
| ZNF441       | 0.0010 |
| KLK12        | 0.0010 |
| LOC100128977 | 0.0010 |
| IL17RA       | 0.0010 |
| NOXRED1      | 0.0010 |
| TNNC2        | 0.0010 |
| PRH1-PRR4    | 0.0010 |
| KPNA2        | 0.0010 |
| PPP4R4       | 0.0010 |
| VEZF1        | 0.0010 |
| CNIH2        | 0.0010 |
| DMRT1        | 0.0010 |
| IFITM4P      | 0.0010 |
| DOCK4        | 0.0010 |
| HLA-DQB2     | 0.0010 |
| LOC100505869 | 0.0010 |
| DUX3         | 0.0010 |
| PDP1         | 0.0010 |
| CNPY2        | 0.0010 |
| FAM177A1     | 0.0010 |
| EBF2         | 0.0010 |
| FLJ31813     | 0.0010 |
| LOC100288181 | 0.0010 |

|              |        |
|--------------|--------|
| NGFR         | 0.0010 |
| ANKRD16      | 0.0010 |
| FAM107A      | 0.0010 |
| NLRP4        | 0.0010 |
| ACOT12       | 0.0010 |
| INSL4        | 0.0010 |
| COX6A2       | 0.0010 |
| LOC100129502 | 0.0010 |
| MTMR4        | 0.0010 |
| SMG8         | 0.0010 |
| TMEM86A      | 0.0010 |
| SERPINE2     | 0.0010 |
| RHOXF2       | 0.0010 |
| C20orf43     | 0.0010 |
| GTF2H2B      | 0.0010 |
| FSCN3        | 0.0010 |
| SPTBN5       | 0.0010 |
| ZXDA         | 0.0010 |
| PIEZO1       | 0.0010 |
| LOC644246    | 0.0010 |
| POLR2E       | 0.0010 |
| DPH3         | 0.0010 |
| TRPV3        | 0.0010 |
| SH3BP5       | 0.0010 |
| LOC100128252 | 0.0010 |
| LOC221814    | 0.0010 |
| CRYZL1       | 0.0010 |
| OK/SW-CL.58  | 0.0010 |
| NOD2         | 0.0010 |
| LOC100507165 | 0.0010 |
| RAD23A       | 0.0010 |
| ZC3H8        | 0.0010 |
| TSPAN1       | 0.0010 |
| POU5F1P4     | 0.0010 |
| CTDSP1       | 0.0010 |
| SHCBP1L      | 0.0010 |
| EPX          | 0.0010 |
| PRAMEF8      | 0.0010 |
| KLRC2        | 0.0010 |
| TUBB6        | 0.0010 |
| FNDC1        | 0.0010 |
| AXL          | 0.0010 |
| GRIN2B       | 0.0010 |
| FRAS1        | 0.0010 |
| MGC2889      | 0.0010 |
| TAS2R40      | 0.0009 |

|              |        |
|--------------|--------|
| RELB         | 0.0009 |
| LIAS         | 0.0009 |
| ANXA4        | 0.0009 |
| IFIT5        | 0.0009 |
| ZNRF3        | 0.0009 |
| CRYGN        | 0.0009 |
| SUGT1        | 0.0009 |
| NEUROG3      | 0.0009 |
| HMOX1        | 0.0009 |
| GRM7         | 0.0009 |
| DLX1         | 0.0009 |
| BUD13        | 0.0009 |
| RPLP1        | 0.0009 |
| CYP2A6       | 0.0009 |
| ZBTB3        | 0.0009 |
| CCDC148      | 0.0009 |
| MRPL20       | 0.0009 |
| SYCE1        | 0.0009 |
| FNBP4        | 0.0009 |
| VN1R5        | 0.0009 |
| FAM200A      | 0.0009 |
| FAM106A      | 0.0009 |
| NDUFB1       | 0.0009 |
| KRT16P3      | 0.0009 |
| GNPTG        | 0.0009 |
| NCAPG2       | 0.0009 |
| XRCC6BP1     | 0.0009 |
| BID          | 0.0009 |
| NFKB2        | 0.0009 |
| PSEN1        | 0.0009 |
| DPT          | 0.0009 |
| C1orf201     | 0.0009 |
| SEMA6B       | 0.0009 |
| WDR45L       | 0.0009 |
| CFB          | 0.0009 |
| STAT5B       | 0.0009 |
| XKR8         | 0.0009 |
| STX4         | 0.0009 |
| ZSWIM2       | 0.0009 |
| HPD          | 0.0009 |
| FEZF2        | 0.0009 |
| SERPINB13    | 0.0009 |
| IKZF1        | 0.0009 |
| TMEM2        | 0.0009 |
| CTSL2        | 0.0009 |
| LOC100506054 | 0.0009 |

|              |        |
|--------------|--------|
| KSR1         | 0.0009 |
| LINC00477    | 0.0009 |
| MARVELD1     | 0.0009 |
| LOC100507265 | 0.0009 |
| ERF          | 0.0009 |
| LOC100507421 | 0.0009 |
| ERI2         | 0.0009 |
| CBR1         | 0.0009 |
| MYH2         | 0.0009 |
| CAPS2        | 0.0009 |
| LOC647946    | 0.0009 |
| PHPT1        | 0.0009 |
| AHSA2        | 0.0009 |
| C12orf69     | 0.0009 |
| FAM83B       | 0.0009 |
| UNC80        | 0.0009 |
| LNK1         | 0.0009 |
| HLA-J        | 0.0009 |
| C4orf22      | 0.0009 |
| WDR52        | 0.0009 |
| CDKN3        | 0.0009 |
| VBP1         | 0.0009 |
| ACSM2A       | 0.0009 |
| AK3          | 0.0009 |
| LOC100652944 | 0.0009 |
| MTCP1        | 0.0009 |
| OMG          | 0.0009 |
| MAGEA4       | 0.0009 |
| TCEB1        | 0.0009 |
| LOC100233156 | 0.0009 |
| PREPL        | 0.0009 |
| DYNC2LI1     | 0.0009 |
| MRM1         | 0.0009 |
| LEPRE1       | 0.0009 |
| ZMAT4        | 0.0009 |
| SS18L1       | 0.0009 |
| PGBD4        | 0.0009 |
| LOC100127886 | 0.0009 |
| NLRP6        | 0.0009 |
| CA3          | 0.0009 |
| CCDC25       | 0.0009 |
| FGF12        | 0.0009 |
| MED14        | 0.0009 |
| HNRNPA0      | 0.0009 |
| HYDIN        | 0.0009 |
| GAB3         | 0.0009 |



|               |        |
|---------------|--------|
| RGPD1         | 0.0009 |
| HAO2          | 0.0009 |
| ENOSF1        | 0.0009 |
| WDR25         | 0.0009 |
| MPPED2        | 0.0009 |
| PNP           | 0.0009 |
| PCDHB9        | 0.0009 |
| LCE5A         | 0.0009 |
| LRFN2         | 0.0009 |
| CDX2          | 0.0009 |
| LOC100130938  | 0.0009 |
| LOC100505894  | 0.0009 |
| SYCE1L        | 0.0009 |
| PPP1R17       | 0.0009 |
| DKFZp779M0652 | 0.0009 |
| DCDC1         | 0.0009 |
| RAB38         | 0.0009 |
| SOX13         | 0.0009 |
| HSPB9         | 0.0009 |
| MYOM2         | 0.0009 |
| PDE5A         | 0.0009 |
| DKK3          | 0.0009 |
| GRK1          | 0.0009 |
| FAM50B        | 0.0009 |
| CDC26         | 0.0009 |
| RP1L1         | 0.0009 |
| LOC653061     | 0.0009 |
| AGXT          | 0.0009 |
| SLC25A45      | 0.0009 |
| LRP5L         | 0.0009 |
| PLEKHA8       | 0.0009 |
| RABGAP1       | 0.0009 |
| TIGD7         | 0.0009 |
| NIT1          | 0.0009 |
| OR11G2        | 0.0009 |
| CCL28         | 0.0009 |
| PHACTR1       | 0.0009 |
| MOCOS         | 0.0009 |
| RAB9BP1       | 0.0009 |
| DCC           | 0.0009 |
| SLC16A3       | 0.0009 |
| STAC3         | 0.0009 |
| ASB9          | 0.0009 |
| MFAP1         | 0.0009 |
| LRRC7         | 0.0009 |
| LDHC          | 0.0009 |

|              |        |
|--------------|--------|
| PAR5         | 0.0009 |
| C16orf86     | 0.0009 |
| EHD4         | 0.0009 |
| SERINC2      | 0.0009 |
| PSTPIP1      | 0.0009 |
| KLK7         | 0.0009 |
| NEK10        | 0.0009 |
| IFI16        | 0.0009 |
| KCNH1        | 0.0009 |
| LOC339524    | 0.0009 |
| LOC100506252 | 0.0009 |
| ZDHHC13      | 0.0009 |
| GCKR         | 0.0009 |
| MIER1        | 0.0009 |
| DNAJC16      | 0.0009 |
| ARHGAP1      | 0.0009 |
| GPX3         | 0.0009 |
| ZKSCAN4      | 0.0009 |
| HMMR         | 0.0009 |
| NAPB         | 0.0009 |
| ANKRD45      | 0.0009 |
| BRK1         | 0.0009 |
| AADAC        | 0.0009 |
| TRIM50       | 0.0009 |
| INTS12       | 0.0009 |
| CCR1         | 0.0009 |
| NS3BP        | 0.0009 |
| SIGLEC5      | 0.0009 |
| AKAP14       | 0.0009 |
| PBX1         | 0.0009 |
| IDE          | 0.0009 |
| SGOL1        | 0.0009 |
| LYPD4        | 0.0009 |
| CTAGE5       | 0.0009 |
| KLRF2        | 0.0009 |
| PEX14        | 0.0009 |
| NT5C3L       | 0.0009 |
| PLSCR4       | 0.0009 |
| PP2D1        | 0.0009 |
| B4GALT3      | 0.0009 |
| POTEB        | 0.0009 |
| KCNA5        | 0.0009 |
| NDUFA12      | 0.0009 |
| PARD6A       | 0.0009 |
| SEMA3C       | 0.0009 |
| AMFR         | 0.0009 |

|               |        |
|---------------|--------|
| RP11-165H20.1 | 0.0009 |
| SLC37A4       | 0.0009 |
| USP10         | 0.0009 |
| CEACAM3       | 0.0009 |
| LINC00328     | 0.0009 |
| RBBP8         | 0.0009 |
| WSCD2         | 0.0009 |
| ATG4B         | 0.0009 |
| LOC100132057  | 0.0009 |
| ATP2A3        | 0.0009 |
| BTF3          | 0.0009 |
| SMURF2        | 0.0009 |
| C11orf45      | 0.0009 |
| OTOP2         | 0.0009 |
| C3AR1         | 0.0009 |
| PPDPF         | 0.0009 |
| ORM2          | 0.0009 |
| RUFY3         | 0.0009 |
| POLR3G        | 0.0009 |
| MBD5          | 0.0009 |
| NRG2          | 0.0009 |
| XXYLT1        | 0.0009 |
| HSD17B13      | 0.0009 |
| C12orf68      | 0.0009 |
| C12orf28      | 0.0009 |
| ACYP2         | 0.0009 |
| LONP2         | 0.0009 |
| PGPEP1L       | 0.0009 |
| OSBP2         | 0.0009 |
| CA10          | 0.0009 |
| SFRP5         | 0.0009 |
| PIEZO2        | 0.0009 |
| C17orf56      | 0.0008 |
| EXOSC2        | 0.0008 |
| TJP2          | 0.0008 |
| EAPP          | 0.0008 |
| LOC100507043  | 0.0008 |
| FGF9          | 0.0008 |
| ALX1          | 0.0008 |
| NPHP4         | 0.0008 |
| PRTG          | 0.0008 |
| TCN1          | 0.0008 |
| C19orf73      | 0.0008 |
| RBMY1E        | 0.0008 |
| SLC9A10       | 0.0008 |
| SIPA1         | 0.0008 |

|          |        |
|----------|--------|
| CEP104   | 0.0008 |
| MT2A     | 0.0008 |
| EDARADD  | 0.0008 |
| KMO      | 0.0008 |
| C12orf33 | 0.0008 |
| SOCS6    | 0.0008 |
| CES1     | 0.0008 |
| MXRA7    | 0.0008 |
| TMEM64   | 0.0008 |
| TRIL     | 0.0008 |
| ASCL1    | 0.0008 |
| HAPLN4   | 0.0008 |
| HECW1    | 0.0008 |
| SLC16A4  | 0.0008 |
| MAN2B1   | 0.0008 |
| SLC38A3  | 0.0008 |
| TLE6     | 0.0008 |
| UBXN6    | 0.0008 |
| ARHGEF4  | 0.0008 |
| NPAT     | 0.0008 |
| CARHSP1  | 0.0008 |
| MLF2     | 0.0008 |
| LYSMD4   | 0.0008 |
| SOLH     | 0.0008 |
| COL6A1   | 0.0008 |
| KIAA1609 | 0.0008 |
| GLI3     | 0.0008 |
| ANXA2    | 0.0008 |
| SEC61B   | 0.0008 |
| CACNA1F  | 0.0008 |
| POU6F2   | 0.0008 |
| TFCP2L1  | 0.0008 |
| PRR15    | 0.0008 |
| IQUB     | 0.0008 |
| ZP1      | 0.0008 |
| RAD52    | 0.0008 |
| TAGLN2   | 0.0008 |
| CRTAC1   | 0.0008 |
| TRPS1    | 0.0008 |
| ISCA2    | 0.0008 |
| CLEC2D   | 0.0008 |
| FAM179B  | 0.0008 |
| NRTN     | 0.0008 |
| IL6      | 0.0008 |
| RAVER2   | 0.0008 |
| TRPC6    | 0.0008 |

|               |        |
|---------------|--------|
| GPR83         | 0.0008 |
| ADAM29        | 0.0008 |
| LRFN1         | 0.0008 |
| PBX2          | 0.0008 |
| SLC13A4       | 0.0008 |
| HRH1          | 0.0008 |
| ITGB1BP2      | 0.0008 |
| TMCO2         | 0.0008 |
| C4orf3        | 0.0008 |
| NAALAD2       | 0.0008 |
| C12orf54      | 0.0008 |
| SIAH1         | 0.0008 |
| HIST2H2BE     | 0.0008 |
| TRIM5         | 0.0008 |
| GPANK1        | 0.0008 |
| APOF          | 0.0008 |
| LOC388152     | 0.0008 |
| RUFY2         | 0.0008 |
| C14orf56      | 0.0008 |
| PDLIM2        | 0.0008 |
| AP3D1         | 0.0008 |
| MKNK2         | 0.0008 |
| LMO4          | 0.0008 |
| LOC100506670  | 0.0008 |
| MAML3         | 0.0008 |
| EFS           | 0.0008 |
| FBP2          | 0.0008 |
| MED27         | 0.0008 |
| LOC389834     | 0.0008 |
| LOC100506548  | 0.0008 |
| CLDN5         | 0.0008 |
| UTS2          | 0.0008 |
| ATP6V0A2      | 0.0008 |
| JMJD7-PLA2G4B | 0.0008 |
| PPP1R3D       | 0.0008 |
| WDSUB1        | 0.0008 |
| EVPLL         | 0.0008 |
| LOC401317     | 0.0008 |
| GLI2          | 0.0008 |
| CPNE5         | 0.0008 |
| RHOXF2B       | 0.0008 |
| MSTN          | 0.0008 |
| REG1P         | 0.0008 |
| KIAA1671      | 0.0008 |
| UBAC2         | 0.0008 |
| IFI35         | 0.0008 |

|              |        |
|--------------|--------|
| SAMD9L       | 0.0008 |
| C3orf70      | 0.0008 |
| FLT1         | 0.0008 |
| PSG8         | 0.0008 |
| LOC144486    | 0.0008 |
| FAIM         | 0.0008 |
| FRZB         | 0.0008 |
| STK4         | 0.0008 |
| SPRR2G       | 0.0008 |
| SMG6         | 0.0008 |
| LOC339803    | 0.0008 |
| ZSWIM6       | 0.0008 |
| ACP2         | 0.0008 |
| GPR176       | 0.0008 |
| HIST3H2BB    | 0.0008 |
| SHANK2       | 0.0008 |
| H19          | 0.0008 |
| PLAA         | 0.0008 |
| C10orf10     | 0.0008 |
| LOC155060    | 0.0008 |
| CNRIP1       | 0.0008 |
| SLC35E4      | 0.0008 |
| ALDOA        | 0.0008 |
| PCMTD2       | 0.0008 |
| MX2          | 0.0008 |
| LOC100129648 | 0.0008 |
| CNPY4        | 0.0008 |
| TMOD2        | 0.0008 |
| ZNF579       | 0.0008 |
| ARL6IP6      | 0.0008 |
| DNTTIP2      | 0.0008 |
| CDK9         | 0.0008 |
| MUC16        | 0.0008 |
| LOC348761    | 0.0008 |
| C6orf35      | 0.0008 |
| C6orf103     | 0.0008 |
| BAMBI        | 0.0008 |
| RPS21        | 0.0008 |
| GK5          | 0.0008 |
| RYR3         | 0.0008 |
| TNFRSF13B    | 0.0008 |
| SMCR7        | 0.0008 |
| TPI1P2       | 0.0008 |
| C9orf62      | 0.0008 |
| C1orf94      | 0.0008 |
| LILRA3       | 0.0008 |

|              |        |
|--------------|--------|
| SPCS1        | 0.0008 |
| KRT71        | 0.0008 |
| C16orf59     | 0.0008 |
| FAM100B      | 0.0008 |
| C17orf97     | 0.0008 |
| NDNF         | 0.0008 |
| ZNF187       | 0.0008 |
| SMCR8        | 0.0008 |
| TPM4         | 0.0008 |
| C8orf85      | 0.0008 |
| TMBIM1       | 0.0008 |
| LOC643802    | 0.0008 |
| IQCH         | 0.0008 |
| TRIM29       | 0.0008 |
| ENPP3        | 0.0008 |
| GSTA3        | 0.0008 |
| RASGEF1C     | 0.0008 |
| PCDH10       | 0.0008 |
| FAM131C      | 0.0008 |
| AGAP1        | 0.0008 |
| PSMD7        | 0.0008 |
| PRSS57       | 0.0008 |
| KLHDC9       | 0.0008 |
| RG9MTD3      | 0.0008 |
| PDHA1        | 0.0008 |
| FAT4         | 0.0008 |
| LOC100131510 | 0.0008 |
| IFI6         | 0.0008 |
| TPRG1L       | 0.0008 |
| RNF11        | 0.0008 |
| KIAA1598     | 0.0008 |
| TBC1D20      | 0.0008 |
| SETD5        | 0.0008 |
| USP36        | 0.0008 |
| GPR21        | 0.0008 |
| ARHGDIB      | 0.0008 |
| SFR1         | 0.0008 |
| MFAP3L       | 0.0008 |
| ITGB1BP1     | 0.0008 |
| TCEA2        | 0.0008 |
| ELAVL1       | 0.0008 |
| PDE6A        | 0.0008 |
| FOSB         | 0.0008 |
| KCNQ1DN      | 0.0008 |
| MAP7D3       | 0.0008 |
| TMEM128      | 0.0008 |

|              |        |
|--------------|--------|
| SLC25A3      | 0.0008 |
| ALPK3        | 0.0008 |
| CRIM1        | 0.0008 |
| LPAL2        | 0.0008 |
| CKS1B        | 0.0008 |
| CWC27        | 0.0008 |
| PTCHD1       | 0.0008 |
| PIP5K1P1     | 0.0008 |
| IL37         | 0.0008 |
| MPV17L2      | 0.0008 |
| SULT1A4      | 0.0008 |
| LOC389043    | 0.0008 |
| OR10H3       | 0.0008 |
| EPHB2        | 0.0008 |
| LMOD1        | 0.0008 |
| LOC100652958 | 0.0008 |
| DDI1         | 0.0008 |
| SRP14        | 0.0008 |
| RET          | 0.0008 |
| CALR3        | 0.0008 |
| LAIR1        | 0.0008 |
| APOBEC3B     | 0.0008 |
| LOC728690    | 0.0008 |
| IGFLR1       | 0.0008 |
| BBS2         | 0.0008 |
| FCGBP        | 0.0008 |
| CCL26        | 0.0008 |
| MILR1        | 0.0008 |
| SPINK4       | 0.0008 |
| RBFA         | 0.0008 |
| LZTFL1       | 0.0008 |
| FAM182B      | 0.0008 |
| MAD2L1BP     | 0.0008 |
| FATE1        | 0.0008 |
| ZDHHC1       | 0.0008 |
| PGAP1        | 0.0008 |
| IL17A        | 0.0008 |
| HIST1H4K     | 0.0008 |
| NIPSNAP3B    | 0.0008 |
| SOX2-OT      | 0.0008 |
| NLRP9        | 0.0008 |
| SAMHD1       | 0.0008 |
| TEX28        | 0.0008 |
| RASD1        | 0.0008 |
| UBL4B        | 0.0008 |
| LOC554201    | 0.0008 |



|              |        |
|--------------|--------|
| USH1G        | 0.0008 |
| ARSJ         | 0.0008 |
| ZAK          | 0.0008 |
| KLK1         | 0.0008 |
| COCH         | 0.0008 |
| MX1          | 0.0008 |
| LOC253805    | 0.0008 |
| LOC100190986 | 0.0008 |
| DUX4         | 0.0008 |
| NFX1         | 0.0008 |
| LOC100130152 | 0.0008 |
| NUAK1        | 0.0008 |
| LOC100128180 | 0.0008 |
| SSR1         | 0.0008 |
| C1orf86      | 0.0008 |
| NFE2L1       | 0.0008 |
| CYSLTR2      | 0.0008 |
| AGGF1        | 0.0008 |
| KIAA0494     | 0.0008 |
| GLIPR2       | 0.0008 |
| LAPTM4A      | 0.0008 |
| KIAA1211     | 0.0008 |
| IFNA5        | 0.0008 |
| CYP2C8       | 0.0008 |
| DIRAS3       | 0.0008 |
| FYTTD1       | 0.0008 |
| CABP2        | 0.0008 |
| CBLN1        | 0.0008 |
| ACRC         | 0.0008 |
| MRPL40       | 0.0008 |
| FPR1         | 0.0008 |
| HIST1H2BL    | 0.0007 |
| LOC126536    | 0.0007 |
| ALDH9A1      | 0.0007 |
| CMA1         | 0.0007 |
| MORN4        | 0.0007 |
| FLJ13197     | 0.0007 |
| FSCN1        | 0.0007 |
| GPR64        | 0.0007 |
| S100P        | 0.0007 |
| LOC647323    | 0.0007 |
| SLC25A26     | 0.0007 |
| LOC401431    | 0.0007 |
| XAF1         | 0.0007 |
| TMEM143      | 0.0007 |
| DIO3OS       | 0.0007 |

|              |        |
|--------------|--------|
| C1orf61      | 0.0007 |
| CWC22        | 0.0007 |
| KIF17        | 0.0007 |
| ATP6V1B1     | 0.0007 |
| CCNB2        | 0.0007 |
| NIT2         | 0.0007 |
| HLA-C        | 0.0007 |
| GYPC         | 0.0007 |
| CYP8B1       | 0.0007 |
| ADAMTS19     | 0.0007 |
| GSTA2        | 0.0007 |
| NKX1-2       | 0.0007 |
| DKFZP434C153 | 0.0007 |
| PCDHGB4      | 0.0007 |
| CENPL        | 0.0007 |
| SIGLEC15     | 0.0007 |
| LMTK2        | 0.0007 |
| RNF181       | 0.0007 |
| GH1          | 0.0007 |
| PSCA         | 0.0007 |
| C18orf55     | 0.0007 |
| SLC35E1      | 0.0007 |
| PANK3        | 0.0007 |
| BATF3        | 0.0007 |
| MUC20        | 0.0007 |
| MZT2B        | 0.0007 |
| TRIM56       | 0.0007 |
| OPTC         | 0.0007 |
| TTC18        | 0.0007 |
| GFRA1        | 0.0007 |
| NEUROD1      | 0.0007 |
| CTXN2        | 0.0007 |
| MAGI1        | 0.0007 |
| C12orf76     | 0.0007 |
| TMED7-TICAM2 | 0.0007 |
| PSKH1        | 0.0007 |
| C16orf79     | 0.0007 |
| FAM86DP      | 0.0007 |
| TMEM89       | 0.0007 |
| AFAP1L2      | 0.0007 |
| TMEM93       | 0.0007 |
| TRAPPC3      | 0.0007 |
| TBC1D24      | 0.0007 |
| FLJ44087     | 0.0007 |
| ZNF70        | 0.0007 |
| UBE2L3       | 0.0007 |

|              |        |
|--------------|--------|
| P4HA3        | 0.0007 |
| GPR85        | 0.0007 |
| IRS1         | 0.0007 |
| SAG          | 0.0007 |
| LRWD1        | 0.0007 |
| MGC23270     | 0.0007 |
| INSL5        | 0.0007 |
| IL6R         | 0.0007 |
| PARP16       | 0.0007 |
| LAMTOR1      | 0.0007 |
| RLN1         | 0.0007 |
| ORC2         | 0.0007 |
| FCGR3A       | 0.0007 |
| NLRP13       | 0.0007 |
| MPZL3        | 0.0007 |
| LOC729444    | 0.0007 |
| SLIT1        | 0.0007 |
| CD6          | 0.0007 |
| TCEAL2       | 0.0007 |
| LOC100132099 | 0.0007 |
| FLJ42709     | 0.0007 |
| DLST         | 0.0007 |
| CCKBR        | 0.0007 |
| IL12B        | 0.0007 |
| CNTN5        | 0.0007 |
| TEX12        | 0.0007 |
| COPB1        | 0.0007 |
| ATP8B1       | 0.0007 |
| SLC22A2      | 0.0007 |
| ATP1A1OS     | 0.0007 |
| CACNA2D4     | 0.0007 |
| NUBP2        | 0.0007 |
| GJB1         | 0.0007 |
| ADAR         | 0.0007 |
| ZNF620       | 0.0007 |
| TFPI         | 0.0007 |
| HCG9         | 0.0007 |
| SF1          | 0.0007 |
| AQR          | 0.0007 |
| C12orf66     | 0.0007 |
| CRYM         | 0.0007 |
| GPR110       | 0.0007 |
| DCAF11       | 0.0007 |
| SIX6         | 0.0007 |
| QSER1        | 0.0007 |
| OR7E156P     | 0.0007 |

|              |        |
|--------------|--------|
| BRAT1        | 0.0007 |
| GNAI1        | 0.0007 |
| PRKAR1B      | 0.0007 |
| AKAP5        | 0.0007 |
| DUSP2        | 0.0007 |
| CLU          | 0.0007 |
| CDC34        | 0.0007 |
| EXOC5        | 0.0007 |
| SGTB         | 0.0007 |
| TACC1        | 0.0007 |
| RALB         | 0.0007 |
| PARD6G       | 0.0007 |
| RBM26        | 0.0007 |
| P4HA2        | 0.0007 |
| SCUBE3       | 0.0007 |
| C21orf71     | 0.0007 |
| FABP12       | 0.0007 |
| BDKRB1       | 0.0007 |
| EIF2AK2      | 0.0007 |
| SRBD1        | 0.0007 |
| DDX19B       | 0.0007 |
| ELAVL2       | 0.0007 |
| GJA5         | 0.0007 |
| FGF13        | 0.0007 |
| LOC100128988 | 0.0007 |
| C7orf69      | 0.0007 |
| LOC100129406 | 0.0007 |
| C9orf69      | 0.0007 |
| TFIP11       | 0.0007 |
| THBS4        | 0.0007 |
| OLR1         | 0.0007 |
| SOAT2        | 0.0007 |
| GNGT2        | 0.0007 |
| IL5          | 0.0007 |
| C16orf73     | 0.0007 |
| C14orf109    | 0.0007 |
| FER1L6-AS1   | 0.0007 |
| ANXA2P3      | 0.0007 |
| C22orf37     | 0.0007 |
| GJC2         | 0.0007 |
| LOC142937    | 0.0007 |
| LIX1         | 0.0007 |
| CEP95        | 0.0007 |
| LOC100505974 | 0.0007 |
| C2orf83      | 0.0007 |
| KRT33B       | 0.0007 |

|              |        |
|--------------|--------|
| LRRC1        | 0.0007 |
| TDRD5        | 0.0007 |
| TRIM65       | 0.0007 |
| LOC100652887 | 0.0007 |
| CTRB1        | 0.0007 |
| C2orf53      | 0.0007 |
| NQO2         | 0.0007 |
| PRR12        | 0.0007 |
| COPG2        | 0.0007 |
| ITGB1BP3     | 0.0007 |
| SAMD12       | 0.0007 |
| LINC00282    | 0.0007 |
| KCNK5        | 0.0007 |
| APOL2        | 0.0007 |
| RNF113A      | 0.0007 |
| CTPS2        | 0.0007 |
| PIGN         | 0.0007 |
| SELP         | 0.0007 |
| MINK1        | 0.0007 |
| NFIL3        | 0.0007 |
| LOC375196    | 0.0007 |
| RPS18        | 0.0007 |
| RPL18A       | 0.0007 |
| CACNA2D2     | 0.0007 |
| ANXA6        | 0.0007 |
| THBS3        | 0.0007 |
| LOC643406    | 0.0007 |
| MIR155HG     | 0.0007 |
| TNFAIP8L3    | 0.0007 |
| DDX20        | 0.0007 |
| ATP10D       | 0.0007 |
| LINC00346    | 0.0007 |
| ASGR1        | 0.0007 |
| DGCR5        | 0.0007 |
| CERS4        | 0.0007 |
| PRKAG3       | 0.0007 |
| ANKRD20A8P   | 0.0007 |
| IFI27L2      | 0.0007 |
| ANKRD36B     | 0.0007 |
| TEX101       | 0.0007 |
| CENPN        | 0.0007 |
| PRKACG       | 0.0007 |
| TLR9         | 0.0007 |
| ZBTB8A       | 0.0007 |
| GCRG224      | 0.0007 |
| FRMD7        | 0.0007 |

|             |        |
|-------------|--------|
| RGS22       | 0.0007 |
| IFITM10     | 0.0007 |
| DAB2        | 0.0007 |
| SEMA3B      | 0.0007 |
| PIGC        | 0.0007 |
| LOC728743   | 0.0007 |
| IL31RA      | 0.0007 |
| ADAM22      | 0.0007 |
| SI          | 0.0007 |
| C4orf52     | 0.0007 |
| PPP1R12A    | 0.0007 |
| ILDR1       | 0.0007 |
| SPANXA2-OT1 | 0.0007 |
| POU5F1      | 0.0007 |
| RNF152      | 0.0007 |
| C6orf165    | 0.0007 |
| POSTN       | 0.0007 |
| C6orf48     | 0.0007 |
| TMED5       | 0.0007 |
| SDR42E1     | 0.0007 |
| UBE3C       | 0.0007 |
| NARF        | 0.0007 |
| IGFALS      | 0.0007 |
| SLC12A5     | 0.0007 |
| TRMT11      | 0.0007 |
| USHBP1      | 0.0007 |
| CXCL1       | 0.0007 |
| HOXC5       | 0.0007 |
| PLA2G2E     | 0.0007 |
| BHMT        | 0.0007 |
| GATAD2B     | 0.0007 |
| PRR14       | 0.0007 |
| IGIP        | 0.0007 |
| RDBP        | 0.0007 |
| FBXW10      | 0.0007 |
| STARD4      | 0.0007 |
| ISCU        | 0.0007 |
| CCDC93      | 0.0007 |
| PRSS21      | 0.0007 |
| MPP7        | 0.0007 |
| NOV         | 0.0007 |
| SLC41A3     | 0.0007 |
| LYSMD1      | 0.0007 |
| ZMYM6       | 0.0007 |
| HIST2H3A    | 0.0007 |
| CASP12      | 0.0007 |

|              |        |
|--------------|--------|
| IL5RA        | 0.0007 |
| TTC21A       | 0.0007 |
| SP3P         | 0.0007 |
| ZDHHHC11     | 0.0007 |
| ZNF812       | 0.0007 |
| C10orf67     | 0.0007 |
| ANXA10       | 0.0007 |
| C1orf187     | 0.0007 |
| KIAA1191     | 0.0007 |
| EYA4         | 0.0007 |
| CTAGE10P     | 0.0007 |
| GML          | 0.0007 |
| CLEC4C       | 0.0007 |
| NTPCR        | 0.0007 |
| MMACHC       | 0.0007 |
| LOC401176    | 0.0007 |
| APOB         | 0.0007 |
| RBM25        | 0.0007 |
| TAS2R5       | 0.0007 |
| ANTXR1       | 0.0007 |
| LOC100128496 | 0.0007 |
| TMEM101      | 0.0007 |
| ABCB11       | 0.0007 |
| HOXA4        | 0.0007 |
| LINC00087    | 0.0007 |
| OVOL1        | 0.0007 |
| BPIFB4       | 0.0007 |
| GATA6        | 0.0007 |
| LCN8         | 0.0007 |
| NDUFA13      | 0.0007 |
| LRRC37B      | 0.0007 |
| MOB3C        | 0.0007 |
| MYOM1        | 0.0007 |
| S100BPB      | 0.0007 |
| LOC100506870 | 0.0007 |
| C5orf13      | 0.0007 |
| TSPAN31      | 0.0007 |
| SCHIP1       | 0.0007 |
| SPRR3        | 0.0007 |
| LOC100133920 | 0.0007 |
| SLC39A2      | 0.0007 |
| SHANK3       | 0.0007 |
| CEP57L1      | 0.0007 |
| CXCL13       | 0.0007 |
| TAF9B        | 0.0007 |
| LINC00466    | 0.0007 |

|              |        |
|--------------|--------|
| C14orf2      | 0.0007 |
| HIST1H2AC    | 0.0007 |
| SASH3        | 0.0007 |
| WDR73        | 0.0007 |
| AGT          | 0.0007 |
| LOC727983    | 0.0007 |
| ABCA1        | 0.0007 |
| CALCA        | 0.0007 |
| TMEM74       | 0.0007 |
| CDC25C       | 0.0007 |
| SLC47A2      | 0.0007 |
| RASGRF1      | 0.0007 |
| TRAM1L1      | 0.0007 |
| MIEN1        | 0.0007 |
| BAGE4        | 0.0007 |
| FANCM        | 0.0007 |
| ZNF598       | 0.0007 |
| MGAT2        | 0.0007 |
| VPS37C       | 0.0007 |
| ANKRD10      | 0.0007 |
| ZDHHC22      | 0.0007 |
| ZNF90        | 0.0007 |
| LOC100130691 | 0.0007 |
| MT1E         | 0.0007 |
| GNL2         | 0.0007 |
| SLC35F4      | 0.0007 |
| MTHFSD       | 0.0007 |
| RASSF3       | 0.0007 |
| SNHG5        | 0.0007 |
| LAMA5        | 0.0007 |
| DEPDC4       | 0.0007 |
| C1QA         | 0.0007 |
| ZNF595       | 0.0007 |
| FMR1NB       | 0.0007 |
| GIMAP8       | 0.0007 |
| BRI3BP       | 0.0007 |
| TGFBR3       | 0.0007 |
| RABL2A       | 0.0007 |
| IYD          | 0.0007 |
| TAS2R60      | 0.0007 |
| TEP1         | 0.0007 |
| C1QTNF9B     | 0.0007 |
| ZNF641       | 0.0007 |
| KIAA0368     | 0.0007 |
| SARM1        | 0.0007 |
| SOSTDC1      | 0.0007 |



|                |        |
|----------------|--------|
| CDCA7          | 0.0007 |
| HBQ1           | 0.0007 |
| SMARCC2        | 0.0007 |
| ASB7           | 0.0007 |
| ZNF765         | 0.0007 |
| SSSCA1         | 0.0007 |
| AKNA           | 0.0007 |
| TNRC6C         | 0.0007 |
| GPR15          | 0.0007 |
| SUPT4H1        | 0.0007 |
| HMCN1          | 0.0007 |
| NFKBID         | 0.0007 |
| DYNC1H1        | 0.0007 |
| FKBP5          | 0.0007 |
| CDK12          | 0.0007 |
| VWA5B1         | 0.0007 |
| FAM150A        | 0.0007 |
| WDR83          | 0.0007 |
| GPATCH1        | 0.0007 |
| ERCC4          | 0.0007 |
| KCNJ4          | 0.0007 |
| GEMIN6         | 0.0006 |
| HIST1H2AG      | 0.0006 |
| CXCL9          | 0.0006 |
| ATP9B          | 0.0006 |
| BBS1           | 0.0006 |
| LOC100506990   | 0.0006 |
| ALDOB          | 0.0006 |
| ZAN            | 0.0006 |
| SRF            | 0.0006 |
| CCDC165        | 0.0006 |
| F7             | 0.0006 |
| C10orf140      | 0.0006 |
| DKFZP686I15217 | 0.0006 |
| GPR62          | 0.0006 |
| ADCY6          | 0.0006 |
| TOX2           | 0.0006 |
| LMO2           | 0.0006 |
| ZMYM2          | 0.0006 |
| DUX4L4         | 0.0006 |
| DSPP           | 0.0006 |
| GLUL           | 0.0006 |
| PLG            | 0.0006 |
| LARP7          | 0.0006 |
| COL1A2         | 0.0006 |
| EPB41L1        | 0.0006 |

|              |        |
|--------------|--------|
| NUDCD3       | 0.0006 |
| RPL31        | 0.0006 |
| EXOC3L1      | 0.0006 |
| PVR          | 0.0006 |
| GMDS         | 0.0006 |
| COL15A1      | 0.0006 |
| KLKB1        | 0.0006 |
| COQ10A       | 0.0006 |
| SHISA6       | 0.0006 |
| CFD          | 0.0006 |
| XYLB         | 0.0006 |
| PHB          | 0.0006 |
| LOC100506406 | 0.0006 |
| PTPDC1       | 0.0006 |
| KRTAP4-9     | 0.0006 |
| MRGPRX4      | 0.0006 |
| LARS2        | 0.0006 |
| PMS2         | 0.0006 |
| IVNS1ABP     | 0.0006 |
| NOS2         | 0.0006 |
| RPS4Y2       | 0.0006 |
| MYH13        | 0.0006 |
| CCL25        | 0.0006 |
| TMEM161B     | 0.0006 |
| COX6A1       | 0.0006 |
| ZNF562       | 0.0006 |
| DTX3L        | 0.0006 |
| STK40        | 0.0006 |
| SKA1         | 0.0006 |
| MC3R         | 0.0006 |
| SLC6A6       | 0.0006 |
| CTNNBIP1     | 0.0006 |
| TAF1L        | 0.0006 |
| ERH          | 0.0006 |
| CBY1         | 0.0006 |
| C17orf53     | 0.0006 |
| EGFL7        | 0.0006 |
| CHIA         | 0.0006 |
| HOMER2       | 0.0006 |
| TYMP         | 0.0006 |
| TARP         | 0.0006 |
| HES7         | 0.0006 |
| C14orf105    | 0.0006 |
| PPM1H        | 0.0006 |
| GRHL3        | 0.0006 |
| CEBPA        | 0.0006 |

|              |        |
|--------------|--------|
| DERL2        | 0.0006 |
| CDY2A        | 0.0006 |
| LAMB2P1      | 0.0006 |
| PPP2R3B      | 0.0006 |
| TPM1         | 0.0006 |
| SCN2B        | 0.0006 |
| SMARCC1      | 0.0006 |
| GATC         | 0.0006 |
| SCUBE1       | 0.0006 |
| DPYS         | 0.0006 |
| LOC100131650 | 0.0006 |
| SLC39A6      | 0.0006 |
| HAUS6        | 0.0006 |
| LGALS3BP     | 0.0006 |
| STAU2        | 0.0006 |
| C10orf125    | 0.0006 |
| BOLA1        | 0.0006 |
| KAZALD1      | 0.0006 |
| C21orf7      | 0.0006 |
| LOC643669    | 0.0006 |
| COX11        | 0.0006 |
| MTRNR2L2     | 0.0006 |
| VMA21        | 0.0006 |
| CRYAA        | 0.0006 |
| PTPN6        | 0.0006 |
| LOC100294362 | 0.0006 |
| ACTG2        | 0.0006 |
| DCAF7        | 0.0006 |
| TAS2R4       | 0.0006 |
| SLC37A2      | 0.0006 |
| SLC22A16     | 0.0006 |
| NT5DC1       | 0.0006 |
| ASNS         | 0.0006 |
| ANAPC10      | 0.0006 |
| RTN4R        | 0.0006 |
| WDR4         | 0.0006 |
| PCDH18       | 0.0006 |
| EFNA4        | 0.0006 |
| PIK3R6       | 0.0006 |
| HOXA3        | 0.0006 |
| DST          | 0.0006 |
| PCBP1        | 0.0006 |
| ZNF583       | 0.0006 |
| SEMA3D       | 0.0006 |
| CYP4F11      | 0.0006 |
| ABCA2        | 0.0006 |

|              |        |
|--------------|--------|
| RELL1        | 0.0006 |
| TMEM22       | 0.0006 |
| CTH          | 0.0006 |
| LEP          | 0.0006 |
| SLC26A10     | 0.0006 |
| IGFN1        | 0.0006 |
| ANAPC16      | 0.0006 |
| SMAP1        | 0.0006 |
| SPON2        | 0.0006 |
| RHOT1        | 0.0006 |
| SYNDIG1L     | 0.0006 |
| ZNF614       | 0.0006 |
| PCBP4        | 0.0006 |
| CA12         | 0.0006 |
| ANKRD30BP2   | 0.0006 |
| ISG20        | 0.0006 |
| ABCB7        | 0.0006 |
| ECM1         | 0.0006 |
| PSMG3        | 0.0006 |
| SLC35B2      | 0.0006 |
| SLC25A29     | 0.0006 |
| KIRREL3      | 0.0006 |
| ANKRD44      | 0.0006 |
| FAM40B       | 0.0006 |
| AIM1         | 0.0006 |
| TMEM191A     | 0.0006 |
| PAMR1        | 0.0006 |
| MED31        | 0.0006 |
| CTXN3        | 0.0006 |
| KRT35        | 0.0006 |
| SCN7A        | 0.0006 |
| RTN4         | 0.0006 |
| ATF7IP2      | 0.0006 |
| ITGA3        | 0.0006 |
| DYRK4        | 0.0006 |
| S100A3       | 0.0006 |
| GPR153       | 0.0006 |
| HMG20B       | 0.0006 |
| DDX5         | 0.0006 |
| TREML1       | 0.0006 |
| MYLK2        | 0.0006 |
| ARSF         | 0.0006 |
| SPSB2        | 0.0006 |
| LOC100128079 | 0.0006 |
| TMEM11       | 0.0006 |
| PIKFYVE      | 0.0006 |

|              |        |
|--------------|--------|
| TCEB2        | 0.0006 |
| NUDT7        | 0.0006 |
| ZNF449       | 0.0006 |
| ELOVL7       | 0.0006 |
| ODF4         | 0.0006 |
| ERAP1        | 0.0006 |
| F2           | 0.0006 |
| LOC100130557 | 0.0006 |
| TBC1D8       | 0.0006 |
| SRSF8        | 0.0006 |
| C9orf53      | 0.0006 |
| ANO10        | 0.0006 |
| LOC100288860 | 0.0006 |
| PSMD3        | 0.0006 |
| ANGPTL1      | 0.0006 |
| SLC1A7       | 0.0006 |
| CYBB         | 0.0006 |
| LOC100506012 | 0.0006 |
| TRIM64       | 0.0006 |
| TFAP2C       | 0.0006 |
| TCEA1        | 0.0006 |
| HOXA9        | 0.0006 |
| LOC100499466 | 0.0006 |
| RPL32        | 0.0006 |
| CLDND1       | 0.0006 |
| PLSCR3       | 0.0006 |
| SND1         | 0.0006 |
| TOB2P1       | 0.0006 |
| BAD          | 0.0006 |
| LOC100287166 | 0.0006 |
| OBFC1        | 0.0006 |
| VPS37B       | 0.0006 |
| PCDHGB2      | 0.0006 |
| RNASE2       | 0.0006 |
| NFATC2       | 0.0006 |
| AQP11        | 0.0006 |
| NPEPL1       | 0.0006 |
| LINC00162    | 0.0006 |
| HPSE2        | 0.0006 |
| NUP133       | 0.0006 |
| KLF9         | 0.0006 |
| TRIM48       | 0.0006 |
| LOC282997    | 0.0006 |
| PMP22        | 0.0006 |
| APOOL        | 0.0006 |
| GNLY         | 0.0006 |

|              |        |
|--------------|--------|
| POM121L12    | 0.0006 |
| CDKN1A       | 0.0006 |
| LSM7         | 0.0006 |
| FILIP1L      | 0.0006 |
| FAM72D       | 0.0006 |
| SOCS4        | 0.0006 |
| NXNL2        | 0.0006 |
| UBN2         | 0.0006 |
| LOC642236    | 0.0006 |
| OSGEP        | 0.0006 |
| PCGF5        | 0.0006 |
| ABCB6        | 0.0006 |
| SH3PXD2A     | 0.0006 |
| WDR37        | 0.0006 |
| DOK5         | 0.0006 |
| EID2         | 0.0006 |
| C1QTNF6      | 0.0006 |
| RGPD6        | 0.0006 |
| RAB28        | 0.0006 |
| FXR1         | 0.0006 |
| SLC13A5      | 0.0006 |
| HTR1A        | 0.0006 |
| TNS4         | 0.0006 |
| QPCTL        | 0.0006 |
| FLOT2        | 0.0006 |
| H1F0         | 0.0006 |
| B9D2         | 0.0006 |
| TRERF1       | 0.0006 |
| PURB         | 0.0006 |
| ATF2         | 0.0006 |
| NDUFS2       | 0.0006 |
| HIST1H2AA    | 0.0006 |
| DDX6         | 0.0006 |
| LINC00338    | 0.0006 |
| MYO18B       | 0.0006 |
| LOC100507605 | 0.0006 |
| ARG2         | 0.0006 |
| OR2S2        | 0.0006 |
| TMEM209      | 0.0006 |
| FMN1         | 0.0006 |
| MBOAT7       | 0.0006 |
| GAS1         | 0.0006 |
| MUC17        | 0.0006 |
| KCND1        | 0.0006 |
| ETV3L        | 0.0006 |
| ACACA        | 0.0006 |

|                |        |
|----------------|--------|
| SGK3           | 0.0006 |
| FCER1G         | 0.0006 |
| C15orf38-AP3S2 | 0.0006 |
| ACTL9          | 0.0006 |
| ARHGEF26       | 0.0006 |
| C4orf39        | 0.0006 |
| C5orf24        | 0.0006 |
| LOC440934      | 0.0006 |
| ENDOG          | 0.0006 |
| TESK1          | 0.0006 |
| MSH4           | 0.0006 |
| KIF26B         | 0.0006 |
| KIAA0930       | 0.0006 |
| KRT19P2        | 0.0006 |
| OR56B1         | 0.0006 |
| GPR180         | 0.0006 |
| SLC4A3         | 0.0006 |
| NAF1           | 0.0006 |
| RAB5B          | 0.0006 |
| GUCA1B         | 0.0006 |
| BEGAIN         | 0.0006 |
| BBS12          | 0.0006 |
| SLC35B4        | 0.0006 |
| VAMP3          | 0.0006 |
| TRIM8          | 0.0006 |
| ARHGAP39       | 0.0006 |
| FAM176B        | 0.0006 |
| GABRA2         | 0.0006 |
| TYROBP         | 0.0006 |
| ZNF580         | 0.0006 |
| KATNB1         | 0.0006 |
| ENPP6          | 0.0006 |
| TOMM7          | 0.0006 |
| HTR2B          | 0.0006 |
| RPS6KC1        | 0.0006 |
| MTF2           | 0.0006 |
| ROPN1          | 0.0006 |
| GRIA4          | 0.0006 |
| GFI1B          | 0.0006 |
| EN2            | 0.0006 |
| LOC100128139   | 0.0006 |
| CILP2          | 0.0006 |
| ZNRF2          | 0.0006 |
| RPL19          | 0.0006 |
| NOVA1          | 0.0006 |
| ADAMTSL5       | 0.0006 |

|              |        |
|--------------|--------|
| SNRPE        | 0.0006 |
| TMCC2        | 0.0006 |
| ST8SIA4      | 0.0006 |
| RAB12        | 0.0006 |
| TBX18        | 0.0006 |
| GPD1L        | 0.0006 |
| ARNTL2       | 0.0006 |
| NCOA3        | 0.0006 |
| MYL2         | 0.0006 |
| DPY19L3      | 0.0006 |
| GSC2         | 0.0006 |
| LOC100287482 | 0.0006 |
| STYXL1       | 0.0006 |
| CUL7         | 0.0006 |
| LOC284454    | 0.0006 |
| DNAJC14      | 0.0006 |
| PRR15L       | 0.0006 |
| USP43        | 0.0006 |
| SPG7         | 0.0006 |
| C5orf47      | 0.0006 |
| GAL3ST1      | 0.0006 |
| ATP6V0E1     | 0.0006 |
| PDHA2        | 0.0006 |
| FOXP4        | 0.0006 |
| IQGAP2       | 0.0006 |
| DEFB1        | 0.0006 |
| REG3G        | 0.0006 |
| PLSCR2       | 0.0006 |
| GAS5         | 0.0006 |
| CDKN2D       | 0.0006 |
| GFRA2        | 0.0006 |
| LOC100506421 | 0.0006 |
| ATG7         | 0.0006 |
| KIF24        | 0.0006 |
| BTNL8        | 0.0006 |
| LOC648987    | 0.0006 |
| ISG15        | 0.0006 |
| TLX3         | 0.0006 |
| RPS28        | 0.0006 |
| FAM185A      | 0.0006 |
| PUS3         | 0.0006 |
| EPHX1        | 0.0006 |
| ZNF770       | 0.0006 |
| LOC100507530 | 0.0006 |
| PLA2R1       | 0.0006 |
| ITIH1        | 0.0006 |



|              |        |
|--------------|--------|
| ORAI2        | 0.0006 |
| ZCCHC14      | 0.0006 |
| ZNF713       | 0.0006 |
| CASP2        | 0.0006 |
| RENBP        | 0.0006 |
| ZNF354B      | 0.0006 |
| HAPLN2       | 0.0006 |
| PFDN2        | 0.0006 |
| TNFSF15      | 0.0006 |
| OR1A2        | 0.0006 |
| SH3GLB2      | 0.0006 |
| BSN-AS2      | 0.0006 |
| PDE4DIP      | 0.0006 |
| CDK18        | 0.0006 |
| BOD1         | 0.0006 |
| CAMK2N2      | 0.0006 |
| LOC100129781 | 0.0006 |
| IL6ST        | 0.0006 |
| MRPL13       | 0.0006 |
| SNX29        | 0.0006 |
| HOXD3        | 0.0006 |
| ARSG         | 0.0006 |
| DDC          | 0.0006 |
| GPHA2        | 0.0006 |
| NDUFB8       | 0.0006 |
| SPAG8        | 0.0006 |
| PSMC1        | 0.0006 |
| CRYBA2       | 0.0006 |
| OCRL         | 0.0006 |
| PRR5         | 0.0006 |
| PSMD13       | 0.0006 |
| CCDC116      | 0.0006 |
| HIST1H1E     | 0.0006 |
| ANKRD13A     | 0.0006 |
| C15orf38     | 0.0006 |
| C17orf101    | 0.0006 |
| LOC647589    | 0.0006 |
| OR2A9P       | 0.0006 |
| WDR63        | 0.0006 |
| GPAT2        | 0.0006 |
| RIN2         | 0.0006 |
| CRTAM        | 0.0006 |
| SSX4B        | 0.0006 |
| MOSPD3       | 0.0006 |
| C1QTNF9      | 0.0006 |
| TSC1         | 0.0006 |

|           |        |
|-----------|--------|
| OR4C46    | 0.0006 |
| CRCP      | 0.0006 |
| C11orf36  | 0.0006 |
| CTAGE3P   | 0.0006 |
| DENND1C   | 0.0006 |
| MATN3     | 0.0006 |
| PAGE2     | 0.0006 |
| PARP11    | 0.0006 |
| GALNT12   | 0.0006 |
| CTNND1    | 0.0006 |
| LOC400604 | 0.0006 |
| HLA-DMA   | 0.0006 |
| MAFB      | 0.0006 |
| PDZK1     | 0.0006 |
| RPL30     | 0.0006 |
| MEMO1     | 0.0006 |
| SRRM4     | 0.0006 |
| NAV1      | 0.0006 |
| IKZF2     | 0.0006 |
| RPH3A     | 0.0006 |
| NUP214    | 0.0006 |
| PSG1      | 0.0006 |
| APOA5     | 0.0006 |
| TMEM48    | 0.0006 |
| ZNF746    | 0.0006 |
| RAX       | 0.0006 |
| TEK       | 0.0006 |
| ACTN1     | 0.0006 |
| PCYOX1    | 0.0006 |
| KCNIP4    | 0.0006 |
| MMP12     | 0.0006 |
| DAZAP2    | 0.0006 |
| ZCCHC5    | 0.0006 |
| PPP2R2C   | 0.0006 |
| NCF1      | 0.0006 |
| PHGDH     | 0.0006 |
| FAM199X   | 0.0006 |
| VPS37A    | 0.0006 |
| RHBDL3    | 0.0006 |
| LMX1B     | 0.0006 |
| GNA11     | 0.0006 |
| RPS4Y1    | 0.0006 |
| IQCF3     | 0.0006 |
| SLC25A17  | 0.0006 |
| SLC1A6    | 0.0006 |
| HAS3      | 0.0006 |

|              |        |
|--------------|--------|
| FUT6         | 0.0006 |
| LOC100506124 | 0.0006 |
| TESC         | 0.0006 |
| PARS2        | 0.0006 |
| CDC23        | 0.0006 |
| ARMC9        | 0.0006 |
| FTCD         | 0.0006 |
| LOC100507419 | 0.0006 |
| C21orf54     | 0.0006 |
| DPYSL5       | 0.0006 |
| ZP4          | 0.0006 |
| PTPRT        | 0.0006 |
| FBXO46       | 0.0006 |
| TIMM23       | 0.0006 |
| ZNF532       | 0.0006 |
| CCL17        | 0.0006 |
| KDM5D        | 0.0006 |
| MLLT10       | 0.0006 |
| CD83         | 0.0006 |
| CARNS1       | 0.0006 |
| LOC439951    | 0.0006 |
| LOC100506328 | 0.0006 |
| EPM2A        | 0.0006 |
| N6AMT1       | 0.0006 |
| HSD11B1      | 0.0006 |
| PLEKHA4      | 0.0006 |
| CLIC6        | 0.0006 |
| C17orf96     | 0.0006 |
| LOC100132273 | 0.0006 |
| UBE2F        | 0.0006 |
| MCF2L        | 0.0006 |
| TMC7         | 0.0006 |
| PRKG2        | 0.0006 |
| IRGC         | 0.0006 |
| NOP14        | 0.0006 |
| KIRREL2      | 0.0006 |
| LPPR1        | 0.0006 |
| SEC22A       | 0.0006 |
| SOX9         | 0.0006 |
| CALCR        | 0.0006 |
| IRF2         | 0.0006 |
| MPV17        | 0.0006 |
| APBA2        | 0.0006 |
| TXLNG2P      | 0.0005 |
| GLIPR1L2     | 0.0005 |
| RABAC1       | 0.0005 |

|              |        |
|--------------|--------|
| SECTM1       | 0.0005 |
| CXADR        | 0.0005 |
| PRR14L       | 0.0005 |
| FSHB         | 0.0005 |
| FANCG        | 0.0005 |
| SYNPO2       | 0.0005 |
| ODZ2         | 0.0005 |
| LOC100288077 | 0.0005 |
| C9orf57      | 0.0005 |
| CBLN4        | 0.0005 |
| ABI2         | 0.0005 |
| FOSL2        | 0.0005 |
| LRRC4        | 0.0005 |
| GBP1         | 0.0005 |
| CDRT1        | 0.0005 |
| LOC393078    | 0.0005 |
| EFHD1        | 0.0005 |
| C12orf50     | 0.0005 |
| TKTL1        | 0.0005 |
| TAAR1        | 0.0005 |
| LOC100653515 | 0.0005 |
| CYBA         | 0.0005 |
| ZNF442       | 0.0005 |
| CHAC2        | 0.0005 |
| FLJ35024     | 0.0005 |
| PEX19        | 0.0005 |
| C8orf71      | 0.0005 |
| KRTCAP3      | 0.0005 |
| STAT4        | 0.0005 |
| PAK2         | 0.0005 |
| LOC100505806 | 0.0005 |
| ANKRD39      | 0.0005 |
| BCL2L14      | 0.0005 |
| LOC644192    | 0.0005 |
| SYCP2L       | 0.0005 |
| TXNDC3       | 0.0005 |
| TSPAN9       | 0.0005 |
| FBXO6        | 0.0005 |
| NDUFA4L2     | 0.0005 |
| COL5A2       | 0.0005 |
| TIMM22       | 0.0005 |
| LOC643837    | 0.0005 |
| FGD3         | 0.0005 |
| AMZ1         | 0.0005 |
| SNX24        | 0.0005 |
| RAB11FIP4    | 0.0005 |

|              |        |
|--------------|--------|
| COPB2        | 0.0005 |
| ATG3         | 0.0005 |
| BNIP1        | 0.0005 |
| STXBP5L      | 0.0005 |
| FCGRT        | 0.0005 |
| C14orf182    | 0.0005 |
| LOC100507096 | 0.0005 |
| KYNU         | 0.0005 |
| RTN3         | 0.0005 |
| AS3MT        | 0.0005 |
| FNTA         | 0.0005 |
| C8orf58      | 0.0005 |
| FAM45A       | 0.0005 |
| MXD3         | 0.0005 |
| 2-Mar        | 0.0005 |
| EGR2         | 0.0005 |
| PCDHA11      | 0.0005 |
| EDN3         | 0.0005 |
| SLC39A11     | 0.0005 |
| SPATA12      | 0.0005 |
| PRKY         | 0.0005 |
| PKHD1        | 0.0005 |
| LRCH3        | 0.0005 |
| SLC5A1       | 0.0005 |
| O3FAR1       | 0.0005 |
| RASA4        | 0.0005 |
| GPR155       | 0.0005 |
| NCF2         | 0.0005 |
| DAO          | 0.0005 |
| S100A6       | 0.0005 |
| RHOA         | 0.0005 |
| NUP210L      | 0.0005 |
| SRPK1        | 0.0005 |
| GOLGA6L6     | 0.0005 |
| LOC100132832 | 0.0005 |
| FGD4         | 0.0005 |
| WNT11        | 0.0005 |
| SKI          | 0.0005 |
| TLR2         | 0.0005 |
| TRAF3IP2     | 0.0005 |
| CDKN1B       | 0.0005 |
| PLXNA2       | 0.0005 |
| ETV6         | 0.0005 |
| CISH         | 0.0005 |
| RGPD2        | 0.0005 |
| PLXNA1       | 0.0005 |

|              |        |
|--------------|--------|
| CALM3        | 0.0005 |
| 8-Sep        | 0.0005 |
| TMED8        | 0.0005 |
| LIMD2        | 0.0005 |
| C2orf81      | 0.0005 |
| NPVF         | 0.0005 |
| LOC387723    | 0.0005 |
| KRTAP1-1     | 0.0005 |
| TAF12        | 0.0005 |
| ZBP1         | 0.0005 |
| GRIN2D       | 0.0005 |
| EGFL8        | 0.0005 |
| SPIB         | 0.0005 |
| QRICH2       | 0.0005 |
| BLOC1S1      | 0.0005 |
| STT3A        | 0.0005 |
| KL           | 0.0005 |
| OLFML1       | 0.0005 |
| METTL14      | 0.0005 |
| ALDH1B1      | 0.0005 |
| USP7         | 0.0005 |
| GABRG1       | 0.0005 |
| FHL1         | 0.0005 |
| FAM136A      | 0.0005 |
| TSNAXIP1     | 0.0005 |
| WRNIP1       | 0.0005 |
| ZBTB8OS      | 0.0005 |
| HNF4A        | 0.0005 |
| EIF1AY       | 0.0005 |
| IER5         | 0.0005 |
| SREBF1       | 0.0005 |
| MDM2         | 0.0005 |
| AIF1L        | 0.0005 |
| FAM84B       | 0.0005 |
| GGT7         | 0.0005 |
| LOC100506409 | 0.0005 |
| GATA2        | 0.0005 |
| RILP         | 0.0005 |
| DSCAM-AS1    | 0.0005 |
| CARD8        | 0.0005 |
| PPP1R2P9     | 0.0005 |
| MFSD6        | 0.0005 |
| TST          | 0.0005 |
| PPTC7        | 0.0005 |
| EXOSC8       | 0.0005 |
| ZBTB46       | 0.0005 |

|              |        |
|--------------|--------|
| THOC1        | 0.0005 |
| CDH3         | 0.0005 |
| STX5         | 0.0005 |
| TNFSF10      | 0.0005 |
| PPY          | 0.0005 |
| BTG2         | 0.0005 |
| SOX2         | 0.0005 |
| LOC100507127 | 0.0005 |
| RBM6         | 0.0005 |
| SDK2         | 0.0005 |
| BRP44        | 0.0005 |
| ALAS2        | 0.0005 |
| ARMC3        | 0.0005 |
| OPRM1        | 0.0005 |
| PHF2         | 0.0005 |
| CEP192       | 0.0005 |
| PARP15       | 0.0005 |
| CCDC27       | 0.0005 |
| KRIT1        | 0.0005 |
| GABRR1       | 0.0005 |
| CUEDC1       | 0.0005 |
| MMP11        | 0.0005 |
| ZNF81        | 0.0005 |
| LOC285957    | 0.0005 |
| BSCL2        | 0.0005 |
| BAAT         | 0.0005 |
| SEC24D       | 0.0005 |
| TBC1D4       | 0.0005 |
| EIF4H        | 0.0005 |
| ELK3         | 0.0005 |
| GOT1         | 0.0005 |
| TAB1         | 0.0005 |
| RALYL        | 0.0005 |
| NACA2        | 0.0005 |
| FGF16        | 0.0005 |
| MGST1        | 0.0005 |
| SS18L2       | 0.0005 |
| GAA          | 0.0005 |
| S100A2       | 0.0005 |
| OPHN1        | 0.0005 |
| CLEC3B       | 0.0005 |
| C1S          | 0.0005 |
| SPATA5L1     | 0.0005 |
| ZNF253       | 0.0005 |
| MIP          | 0.0005 |
| TMEM129      | 0.0005 |

|              |        |
|--------------|--------|
| POLR2D       | 0.0005 |
| LDHA         | 0.0005 |
| ARID3B       | 0.0005 |
| TSC22D4      | 0.0005 |
| ABCC5        | 0.0005 |
| FAH          | 0.0005 |
| ZNF175       | 0.0005 |
| THAP2        | 0.0005 |
| COX18        | 0.0005 |
| TRIM14       | 0.0005 |
| ANKRD65      | 0.0005 |
| RPL22L1      | 0.0005 |
| RBKS         | 0.0005 |
| FRAT2        | 0.0005 |
| ZNF619       | 0.0005 |
| REXO1L1      | 0.0005 |
| ALS2CR12     | 0.0005 |
| MYOC         | 0.0005 |
| NPIPL3       | 0.0005 |
| B3GALT6      | 0.0005 |
| TP53AIP1     | 0.0005 |
| LOC100506113 | 0.0005 |
| LOC646626    | 0.0005 |
| TAS2R13      | 0.0005 |
| ADD2         | 0.0005 |
| SIGLEC8      | 0.0005 |
| WBSCR28      | 0.0005 |
| FAM160A1     | 0.0005 |
| LOC493754    | 0.0005 |
| AP3B1        | 0.0005 |
| ZNF382       | 0.0005 |
| TTY11        | 0.0005 |
| LONRF3       | 0.0005 |
| DRAM1        | 0.0005 |
| MRPL48       | 0.0005 |
| WHSC1L1      | 0.0005 |
| KLHDC4       | 0.0005 |
| FAM101B      | 0.0005 |
| EID1         | 0.0005 |
| OR10A2       | 0.0005 |
| C19orf60     | 0.0005 |
| C1orf93      | 0.0005 |
| CCDC81       | 0.0005 |
| ZBED4        | 0.0005 |
| NFIB         | 0.0005 |
| PRSS35       | 0.0005 |



|              |        |
|--------------|--------|
| EHBP1        | 0.0005 |
| CCL23        | 0.0005 |
| MARS         | 0.0005 |
| GREB1L       | 0.0005 |
| SPG20        | 0.0005 |
| RRS1         | 0.0005 |
| FRMD6        | 0.0005 |
| SCG3         | 0.0005 |
| SRSF5        | 0.0005 |
| MGC16121     | 0.0005 |
| KBTBD10      | 0.0005 |
| TMEM98       | 0.0005 |
| MEIS3P1      | 0.0005 |
| CCDC79       | 0.0005 |
| LANCL3       | 0.0005 |
| HCN4         | 0.0005 |
| GMFG         | 0.0005 |
| IL36B        | 0.0005 |
| FAM47A       | 0.0005 |
| STXBP1       | 0.0005 |
| KLHL32       | 0.0005 |
| CELF1        | 0.0005 |
| C19orf47     | 0.0005 |
| C20orf194    | 0.0005 |
| CCDC85A      | 0.0005 |
| LOC730755    | 0.0005 |
| SPATA8       | 0.0005 |
| EREG         | 0.0005 |
| FAM41C       | 0.0005 |
| KIAA1644     | 0.0005 |
| DOHH         | 0.0005 |
| LOC284440    | 0.0005 |
| C10orf90     | 0.0005 |
| SF3B5        | 0.0005 |
| KDR          | 0.0005 |
| MOGAT1       | 0.0005 |
| LOC100652730 | 0.0005 |
| RIPK2        | 0.0005 |
| SFTA1P       | 0.0005 |
| TATDN3       | 0.0005 |
| ITGA2        | 0.0005 |
| LSM12        | 0.0005 |
| PAM16        | 0.0005 |
| TAGLN        | 0.0005 |
| LOC100505813 | 0.0005 |
| GCAT         | 0.0005 |

|              |        |
|--------------|--------|
| TMEM40       | 0.0005 |
| DEFB103B     | 0.0005 |
| FAM32A       | 0.0005 |
| PSMA1        | 0.0005 |
| GIMAP2       | 0.0005 |
| CSNK1A1      | 0.0005 |
| SH2D1A       | 0.0005 |
| CCDC127      | 0.0005 |
| RPS11        | 0.0005 |
| ALDH4A1      | 0.0005 |
| FST          | 0.0005 |
| NPBWR1       | 0.0005 |
| ARPC4-TTLL3  | 0.0005 |
| PDHB         | 0.0005 |
| NEDD4L       | 0.0005 |
| LOC100190938 | 0.0005 |
| MMP14        | 0.0005 |
| SERPINB2     | 0.0005 |
| HIST1H4J     | 0.0005 |
| NGRN         | 0.0005 |
| CHCHD2       | 0.0005 |
| ADCK4        | 0.0005 |
| AMY1C        | 0.0005 |
| PLK1         | 0.0005 |
| NEO1         | 0.0005 |
| HERC2P4      | 0.0005 |
| ESAM         | 0.0005 |
| TDRKH        | 0.0005 |
| LHX2         | 0.0005 |
| GLOD4        | 0.0005 |
| KLB          | 0.0005 |
| SNTA1        | 0.0005 |
| MBNL1        | 0.0005 |
| LOC644656    | 0.0005 |
| LOC100130433 | 0.0005 |
| GMPR         | 0.0005 |
| TMED10       | 0.0005 |
| PRDX5        | 0.0005 |
| GAL3ST3      | 0.0005 |
| IFT172       | 0.0005 |
| KCNK2        | 0.0005 |
| LOC100287616 | 0.0005 |
| NOTCH2       | 0.0005 |
| KBTBD5       | 0.0005 |
| CCDC121      | 0.0005 |
| ACTR3BP2     | 0.0005 |

|           |        |
|-----------|--------|
| CAMKK2    | 0.0005 |
| LGALS9    | 0.0005 |
| SEC14L1   | 0.0005 |
| ZMYM6NB   | 0.0005 |
| SERINC4   | 0.0005 |
| FTSJ3     | 0.0005 |
| OR4S1     | 0.0005 |
| DLEU7     | 0.0005 |
| TSN       | 0.0005 |
| RCAN2     | 0.0005 |
| ALX4      | 0.0005 |
| C3orf19   | 0.0005 |
| GMEB1     | 0.0005 |
| TCP10L2   | 0.0005 |
| STK10     | 0.0005 |
| TRIM27    | 0.0005 |
| OIP5      | 0.0005 |
| GDF15     | 0.0005 |
| ELAC1     | 0.0005 |
| SOS2      | 0.0005 |
| LOC730101 | 0.0005 |
| GABPB1    | 0.0005 |
| HHLA2     | 0.0005 |
| TMEM140   | 0.0005 |
| STRA13    | 0.0005 |
| FKBP9     | 0.0005 |
| RPL11     | 0.0005 |
| SMPD3     | 0.0005 |
| DSG4      | 0.0005 |
| CLPP      | 0.0005 |
| CDSN      | 0.0005 |
| KIAA0182  | 0.0005 |
| DAZL      | 0.0005 |
| LOC283701 | 0.0005 |
| NANP      | 0.0005 |
| CLDN12    | 0.0005 |
| GABRD     | 0.0005 |
| USP2      | 0.0005 |
| UBR1      | 0.0005 |
| RPL14     | 0.0005 |
| RAC1      | 0.0005 |
| MAPK14    | 0.0005 |
| SEMA4C    | 0.0005 |
| PARK7     | 0.0005 |
| ANKRD17   | 0.0005 |
| COX1      | 0.0005 |

|           |        |
|-----------|--------|
| C1orf145  | 0.0005 |
| COL4A4    | 0.0005 |
| FAM170A   | 0.0005 |
| ERCC6L    | 0.0005 |
| JUN       | 0.0005 |
| CDO1      | 0.0005 |
| SLC30A2   | 0.0005 |
| IDO1      | 0.0005 |
| ZNRD1     | 0.0005 |
| RPS9      | 0.0005 |
| TMEM165   | 0.0005 |
| LINC00189 | 0.0005 |
| C14orf119 | 0.0005 |
| LOC727916 | 0.0005 |
| HPX-2     | 0.0005 |
| HMGXB4    | 0.0005 |
| PBX4      | 0.0005 |
| FAM117A   | 0.0005 |
| C15orf34  | 0.0005 |
| KRT16P2   | 0.0005 |
| CD5L      | 0.0005 |
| SMAD6     | 0.0005 |
| C6orf81   | 0.0005 |
| FAT1      | 0.0005 |
| C5orf55   | 0.0005 |
| VSIG10    | 0.0005 |
| HDLBP     | 0.0005 |
| MGST2     | 0.0005 |
| CUL5      | 0.0005 |
| C14orf149 | 0.0005 |
| DDX17     | 0.0005 |
| PPP1R12B  | 0.0005 |
| MTRNR2L6  | 0.0005 |
| CD3EAP    | 0.0005 |
| ITSN2     | 0.0005 |
| KIF5C     | 0.0005 |
| C1orf52   | 0.0005 |
| MZT2A     | 0.0005 |
| YSK4      | 0.0005 |
| OR5T2     | 0.0005 |
| OR7A17    | 0.0005 |
| CMKLR1    | 0.0005 |
| GPR174    | 0.0005 |
| PARP6     | 0.0005 |
| PDZD2     | 0.0005 |
| HAVCR1    | 0.0005 |

|              |        |
|--------------|--------|
| C6orf26      | 0.0005 |
| AGAP8        | 0.0005 |
| PNMT         | 0.0005 |
| LOC283143    | 0.0005 |
| CNIH3        | 0.0005 |
| GIN1         | 0.0005 |
| TG           | 0.0005 |
| SNRPA        | 0.0005 |
| FAM134C      | 0.0005 |
| VPS72        | 0.0005 |
| ADRA1A       | 0.0005 |
| RNU12        | 0.0005 |
| PRDM10       | 0.0005 |
| LOC100506546 | 0.0005 |
| MYOM3        | 0.0005 |
| C9orf167     | 0.0005 |
| C21orf56     | 0.0005 |
| TCEAL4       | 0.0005 |
| ADK          | 0.0005 |
| PCP2         | 0.0005 |
| SNAP91       | 0.0005 |
| TNF          | 0.0005 |
| ZNF419       | 0.0005 |
| LOC100134091 | 0.0005 |
| NOTCH3       | 0.0005 |
| PGLYRP3      | 0.0005 |
| PRODH2       | 0.0005 |
| APBB2        | 0.0005 |
| CCDC130      | 0.0005 |
| MYL5         | 0.0005 |
| RPS12        | 0.0005 |
| OR2J2        | 0.0005 |
| PRR7         | 0.0005 |
| FOXQ1        | 0.0005 |
| CFC1         | 0.0005 |
| ATP5O        | 0.0005 |
| ZBTB7C       | 0.0005 |
| MAD2L2       | 0.0005 |
| LOC100127983 | 0.0005 |
| FDXR         | 0.0005 |
| SLC25A20     | 0.0005 |
| EXPH5        | 0.0005 |
| GAFA3        | 0.0005 |
| AQP7         | 0.0005 |
| APP          | 0.0005 |
| SH2B3        | 0.0005 |

|            |        |
|------------|--------|
| DIO3       | 0.0005 |
| C18orf18   | 0.0005 |
| ADCY10     | 0.0005 |
| LCE1D      | 0.0005 |
| C17orf89   | 0.0005 |
| KIF1C      | 0.0005 |
| KCTD13     | 0.0005 |
| RAPGEFL1   | 0.0005 |
| C14orf159  | 0.0005 |
| NDP        | 0.0005 |
| RNF26      | 0.0005 |
| MAB21L2    | 0.0005 |
| NMT2       | 0.0005 |
| FAM64A     | 0.0005 |
| TNNT2      | 0.0005 |
| OTOGL      | 0.0005 |
| DALRD3     | 0.0005 |
| ZFP2       | 0.0005 |
| LPPR3      | 0.0005 |
| FRMPD2     | 0.0005 |
| SPHAR      | 0.0005 |
| C19orf56   | 0.0005 |
| LOC387895  | 0.0005 |
| LOC286149  | 0.0005 |
| MT1H       | 0.0005 |
| METTL4     | 0.0005 |
| ANKRD9     | 0.0005 |
| TUBA4A     | 0.0005 |
| MAP3K12    | 0.0005 |
| FZD10      | 0.0005 |
| CDHR2      | 0.0005 |
| LOC401098  | 0.0005 |
| C11orf86   | 0.0005 |
| MYH15      | 0.0005 |
| TMEM80     | 0.0005 |
| PRICKLE4   | 0.0005 |
| C6orf57    | 0.0005 |
| WWP1       | 0.0005 |
| MED17      | 0.0005 |
| TRPM6      | 0.0005 |
| PPARGC1A   | 0.0005 |
| NCRNA00185 | 0.0005 |
| CYP7A1     | 0.0005 |
| SCAF11     | 0.0005 |
| CNNM4      | 0.0005 |
| MVP        | 0.0005 |

|               |        |
|---------------|--------|
| KIAA1210      | 0.0005 |
| SNHG11        | 0.0005 |
| VPS4A         | 0.0005 |
| SDHAP1        | 0.0005 |
| CCDC167       | 0.0005 |
| HBBP1         | 0.0005 |
| MYCNOS        | 0.0005 |
| WDR72         | 0.0005 |
| LINC00340     | 0.0005 |
| HTR1D         | 0.0005 |
| NKG7          | 0.0005 |
| DICER1        | 0.0005 |
| PSME3         | 0.0005 |
| GCC2          | 0.0005 |
| SPRED1        | 0.0005 |
| EIF5A2        | 0.0005 |
| PCSK1         | 0.0005 |
| VWDE          | 0.0005 |
| ZBTB1         | 0.0005 |
| FAM18B2-CDRT4 | 0.0005 |
| HCP5B         | 0.0005 |
| MAN1B1        | 0.0005 |
| PHYH          | 0.0005 |
| C3orf18       | 0.0005 |
| LOC100506686  | 0.0005 |
| LRRC17        | 0.0005 |
| CAPN13        | 0.0005 |
| NDUFB4        | 0.0005 |
| TIPARP        | 0.0005 |
| EMBP1         | 0.0005 |
| FPR2          | 0.0005 |
| TUSC3         | 0.0005 |
| LOC440354     | 0.0005 |
| CCDC102B      | 0.0005 |
| FTH1          | 0.0005 |
| RPS10         | 0.0005 |
| OAS1          | 0.0005 |
| VN1R2         | 0.0005 |
| DCUN1D5       | 0.0005 |
| TAF8          | 0.0005 |
| CSPG4         | 0.0005 |
| BSN           | 0.0005 |
| C8orf42       | 0.0005 |
| TOR1AIP2      | 0.0005 |
| KDELC1        | 0.0005 |
| NR2F2         | 0.0005 |

|              |        |
|--------------|--------|
| RPL10        | 0.0005 |
| SDS          | 0.0005 |
| AURKB        | 0.0005 |
| PABPC1L2B    | 0.0005 |
| SERPINF2     | 0.0005 |
| HSPB1        | 0.0005 |
| AMICA1       | 0.0005 |
| PLEKHA2      | 0.0005 |
| PSTPIP2      | 0.0005 |
| LYRM5        | 0.0005 |
| SCCPDH       | 0.0005 |
| C13orf30     | 0.0005 |
| ING4         | 0.0005 |
| LOC100293516 | 0.0005 |
| DEFB106B     | 0.0005 |
| B4GALT5      | 0.0005 |
| TRPT1        | 0.0005 |
| SPATA13      | 0.0005 |
| INSM1        | 0.0005 |
| MYF5         | 0.0005 |
| PPP1R35      | 0.0005 |
| GPT2         | 0.0005 |
| SEPN1        | 0.0005 |
| OR7G3        | 0.0005 |
| PPM1B        | 0.0005 |
| DZANK1       | 0.0005 |
| B3GALTL      | 0.0005 |
| CBWD5        | 0.0005 |
| HBD          | 0.0005 |
| EIF4A1       | 0.0005 |
| LCT          | 0.0005 |
| PYGB         | 0.0005 |
| LOC100509780 | 0.0005 |
| TMEM45B      | 0.0005 |
| TRAPPC2      | 0.0005 |
| TP53         | 0.0005 |
| LOC554206    | 0.0005 |
| CC2D1B       | 0.0005 |
| ZNF160       | 0.0005 |
| GBA          | 0.0005 |
| LOC100505870 | 0.0005 |
| EMD          | 0.0005 |
| AFM          | 0.0005 |
| TCEANC       | 0.0005 |
| BIN2         | 0.0005 |
| GM2A         | 0.0005 |



|                 |        |
|-----------------|--------|
| LOC642620       | 0.0005 |
| BTBD8           | 0.0005 |
| HTR3E           | 0.0005 |
| TTLL7           | 0.0005 |
| FAM193A         | 0.0005 |
| C1orf229        | 0.0005 |
| TNIP3           | 0.0005 |
| ATP13A3         | 0.0005 |
| VAV3            | 0.0005 |
| LPAR3           | 0.0005 |
| C12orf56        | 0.0005 |
| IRAK1BP1        | 0.0005 |
| CALY            | 0.0005 |
| PHOSPHO2-KLHL23 | 0.0005 |
| TGIF2LY         | 0.0005 |
| ACY1            | 0.0005 |
| HP              | 0.0005 |
| FAM135A         | 0.0005 |
| EDEM2           | 0.0005 |
| ACAA2           | 0.0005 |
| TRIM38          | 0.0005 |
| LOC728739       | 0.0005 |
| GLMN            | 0.0005 |
| SMA5            | 0.0005 |
| C8orf48         | 0.0005 |
| LSAMP           | 0.0005 |
| FMR1            | 0.0005 |
| FAM95B1         | 0.0005 |
| LOC100129884    | 0.0005 |
| MRPL23          | 0.0005 |
| IPO11           | 0.0005 |
| CXCL2           | 0.0005 |
| LOC728716       | 0.0005 |
| CCDC19          | 0.0005 |
| CENPJ           | 0.0005 |
| CCL5            | 0.0005 |
| POMC            | 0.0005 |
| PGK2            | 0.0005 |
| C1orf190        | 0.0005 |
| WARS2           | 0.0005 |
| PYGM            | 0.0005 |
| PLEKHG4         | 0.0005 |
| BIVM            | 0.0005 |
| VPS13D          | 0.0005 |
| EPN2            | 0.0005 |
| DBH             | 0.0005 |

|              |        |
|--------------|--------|
| C10orf128    | 0.0005 |
| HARS2        | 0.0005 |
| WDR34        | 0.0005 |
| VAC14        | 0.0005 |
| CPT1A        | 0.0005 |
| STAT1        | 0.0005 |
| EVI2B        | 0.0005 |
| ESYT3        | 0.0005 |
| HBE1         | 0.0005 |
| TMEM55A      | 0.0005 |
| HCAR3        | 0.0005 |
| PUSL1        | 0.0005 |
| HIST1H1D     | 0.0005 |
| C17orf100    | 0.0005 |
| SIK2         | 0.0005 |
| TMPRSS9      | 0.0005 |
| WWOX         | 0.0005 |
| SORD         | 0.0005 |
| RAB39        | 0.0005 |
| SLC36A2      | 0.0005 |
| MRPL39       | 0.0005 |
| TAF15        | 0.0005 |
| ZC3H7A       | 0.0005 |
| ORAOV1       | 0.0005 |
| VAV2         | 0.0005 |
| SPG11        | 0.0005 |
| ZNF518A      | 0.0005 |
| HIST3H2A     | 0.0005 |
| SERPINB1     | 0.0005 |
| CHAT         | 0.0005 |
| SPACA7       | 0.0005 |
| SMG1         | 0.0005 |
| CCT6P1       | 0.0005 |
| ARHGEF5      | 0.0005 |
| CYP4V2       | 0.0005 |
| LOC100507507 | 0.0005 |
| LY6G6F       | 0.0005 |
| PECR         | 0.0005 |
| GCM1         | 0.0005 |
| TTY6         | 0.0005 |
| UBASH3B      | 0.0005 |
| YIPF7        | 0.0005 |
| TNNT1        | 0.0005 |
| TRIP10       | 0.0005 |
| CACNB1       | 0.0005 |
| CD84         | 0.0005 |

|          |        |
|----------|--------|
| CBR3     | 0.0005 |
| ZFP28    | 0.0005 |
| DTYMK    | 0.0005 |
| PTTG2    | 0.0005 |
| OR7A10   | 0.0005 |
| ZNF132   | 0.0005 |
| ATXN7    | 0.0005 |
| DCUN1D3  | 0.0005 |
| TUBB2A   | 0.0005 |
| GPR26    | 0.0005 |
| UGT2B7   | 0.0005 |
| ATP11A   | 0.0005 |
| GPR114   | 0.0005 |
| COX2     | 0.0005 |
| CDRT15   | 0.0005 |
| C5orf58  | 0.0005 |
| KRT7     | 0.0005 |
| ZPLD1    | 0.0005 |
| UBOX5    | 0.0005 |
| GNPTAB   | 0.0005 |
| C19orf48 | 0.0005 |
| ZBTB20   | 0.0005 |
| SNORA78  | 0.0005 |
| PART1    | 0.0005 |
| AOX1     | 0.0005 |
| LHFP     | 0.0005 |
| BCL11A   | 0.0005 |
| HSPA2    | 0.0005 |
| EXOC6    | 0.0005 |
| HIST1H4I | 0.0005 |
| ANKRD57  | 0.0005 |
| TSPYL1   | 0.0005 |
| KIAA1456 | 0.0005 |
| PRPF18   | 0.0005 |
| ODC1     | 0.0005 |
| SLFN11   | 0.0005 |
| SERPINB7 | 0.0005 |
| IL36RN   | 0.0004 |
| RFTN1    | 0.0004 |
| TMEM208  | 0.0004 |
| CDC42BPA | 0.0004 |
| ZNF131   | 0.0004 |
| DNAJB7   | 0.0004 |
| SEC24A   | 0.0004 |
| STARD5   | 0.0004 |
| POLR2H   | 0.0004 |

|              |        |
|--------------|--------|
| HBG1         | 0.0004 |
| TMOD1        | 0.0004 |
| ZSCAN16      | 0.0004 |
| CNOT4        | 0.0004 |
| ADNP         | 0.0004 |
| PPBPL2       | 0.0004 |
| OXGR1        | 0.0004 |
| ACOXL        | 0.0004 |
| LYZ          | 0.0004 |
| C17orf108    | 0.0004 |
| PPP2R1B      | 0.0004 |
| ZFP41        | 0.0004 |
| OR1F1        | 0.0004 |
| OR10A5       | 0.0004 |
| KIAA1524     | 0.0004 |
| LOC100652917 | 0.0004 |
| AHCTF1       | 0.0004 |
| TMPRSS5      | 0.0004 |
| TCL1A        | 0.0004 |
| TTY10        | 0.0004 |
| ATP5G2       | 0.0004 |
| ASB10        | 0.0004 |
| COLEC11      | 0.0004 |
| PRKDC        | 0.0004 |
| LOC100505711 | 0.0004 |
| HILS1        | 0.0004 |
| CDHR1        | 0.0004 |
| BPIFA4P      | 0.0004 |
| STARD13      | 0.0004 |
| FERMT1       | 0.0004 |
| SERPINB11    | 0.0004 |
| IL11         | 0.0004 |
| LOC100133039 | 0.0004 |
| PRR16        | 0.0004 |
| KCNJ8        | 0.0004 |
| HEXDC        | 0.0004 |
| PRKCZ        | 0.0004 |
| LOC100507008 | 0.0004 |
| GNG2         | 0.0004 |
| SLC45A4      | 0.0004 |
| NRG1         | 0.0004 |
| CDK20        | 0.0004 |
| SOX5         | 0.0004 |
| MASTL        | 0.0004 |
| TBC1D3F      | 0.0004 |
| GKN1         | 0.0004 |

|          |        |
|----------|--------|
| TOP2B    | 0.0004 |
| ARC      | 0.0004 |
| HLA-L    | 0.0004 |
| HPR      | 0.0004 |
| CMTM5    | 0.0004 |
| SLC29A1  | 0.0004 |
| MYOCD    | 0.0004 |
| RAB24    | 0.0004 |
| PPP2R3C  | 0.0004 |
| ADCY5    | 0.0004 |
| FAM174A  | 0.0004 |
| OR13C4   | 0.0004 |
| NDUFB2   | 0.0004 |
| CHST8    | 0.0004 |
| SLC35G3  | 0.0004 |
| C19orf77 | 0.0004 |
| SERPINA1 | 0.0004 |
| AASS     | 0.0004 |
| PPIG     | 0.0004 |
| STOX2    | 0.0004 |
| SNRK     | 0.0004 |
| PRSS30P  | 0.0004 |
| FAM83E   | 0.0004 |
| OLFML2B  | 0.0004 |
| TMEM179  | 0.0004 |
| WNT2B    | 0.0004 |
| CCDC48   | 0.0004 |
| SNX5     | 0.0004 |
| AHSG     | 0.0004 |
| JAKMIP2  | 0.0004 |
| WDR31    | 0.0004 |
| EFCAB6   | 0.0004 |
| SLC39A5  | 0.0004 |
| KIAA1009 | 0.0004 |
| SNRNP35  | 0.0004 |
| CYB5D1   | 0.0004 |
| RAI14    | 0.0004 |
| TP53I3   | 0.0004 |
| NR5A1    | 0.0004 |
| TEC      | 0.0004 |
| MRRF     | 0.0004 |
| C6orf25  | 0.0004 |
| KIF2C    | 0.0004 |
| IRAK2    | 0.0004 |
| LRRC8C   | 0.0004 |
| H3F3B    | 0.0004 |

|              |        |
|--------------|--------|
| FAM78B       | 0.0004 |
| TPBG         | 0.0004 |
| CDK11B       | 0.0004 |
| GSTTP1       | 0.0004 |
| G0S2         | 0.0004 |
| C1orf228     | 0.0004 |
| ZKSCAN1      | 0.0004 |
| DUSP6        | 0.0004 |
| HEATR2       | 0.0004 |
| TULP3        | 0.0004 |
| RNF157       | 0.0004 |
| SVIL         | 0.0004 |
| RC3H2        | 0.0004 |
| PRMT8        | 0.0004 |
| PROX1        | 0.0004 |
| MICAL3       | 0.0004 |
| ARIH2        | 0.0004 |
| FLNB         | 0.0004 |
| SCML2        | 0.0004 |
| PTAFR        | 0.0004 |
| LOC643201    | 0.0004 |
| C1orf204     | 0.0004 |
| TMEM229A     | 0.0004 |
| VSX1         | 0.0004 |
| KIF13B       | 0.0004 |
| PIP          | 0.0004 |
| LINC00052    | 0.0004 |
| RFC3         | 0.0004 |
| TMEM219      | 0.0004 |
| OR2C3        | 0.0004 |
| LOC100505622 | 0.0004 |
| LOC728875    | 0.0004 |
| WISP3        | 0.0004 |
| GALNTL5      | 0.0004 |
| LOC100128288 | 0.0004 |
| OR5AP2       | 0.0004 |
| LOC341056    | 0.0004 |
| SLC27A6      | 0.0004 |
| PTCHD2       | 0.0004 |
| SPINK6       | 0.0004 |
| EHHADH       | 0.0004 |
| TAMM41       | 0.0004 |
| ABCE1        | 0.0004 |
| ASPA         | 0.0004 |
| ADAMTS15     | 0.0004 |
| LOC100506050 | 0.0004 |

|              |        |
|--------------|--------|
| ASB14        | 0.0004 |
| LOC100288594 | 0.0004 |
| CD209        | 0.0004 |
| L3MBTL1      | 0.0004 |
| WDR18        | 0.0004 |
| TCEAL8       | 0.0004 |
| 1-Sep        | 0.0004 |
| TM4SF1       | 0.0004 |
| ZNRF4        | 0.0004 |
| LSM14A       | 0.0004 |
| TRIP4        | 0.0004 |
| MB21D1       | 0.0004 |
| C6orf15      | 0.0004 |
| MATN1        | 0.0004 |
| PAK3         | 0.0004 |
| ABCB5        | 0.0004 |
| SERP1        | 0.0004 |
| ZNF193       | 0.0004 |
| GJB6         | 0.0004 |
| PDZRN3       | 0.0004 |
| GRM3         | 0.0004 |
| ADAT3        | 0.0004 |
| GPR128       | 0.0004 |
| HBEGF        | 0.0004 |
| HERPUD2      | 0.0004 |
| LOC151300    | 0.0004 |
| SH3TC2       | 0.0004 |
| STATH        | 0.0004 |
| FLT3         | 0.0004 |
| MTUS2        | 0.0004 |
| C1RL         | 0.0004 |
| PLCB4        | 0.0004 |
| ORC6         | 0.0004 |
| MRPS16       | 0.0004 |
| IMMP2L       | 0.0004 |
| ARHGAP9      | 0.0004 |
| OGFR         | 0.0004 |
| CTSK         | 0.0004 |
| PCK1         | 0.0004 |
| C1orf144     | 0.0004 |
| DAP3         | 0.0004 |
| ADAMTS5      | 0.0004 |
| GPR173       | 0.0004 |
| PUM2         | 0.0004 |
| LOC100505566 | 0.0004 |
| FBXW2        | 0.0004 |

|              |        |
|--------------|--------|
| NLRP2        | 0.0004 |
| LOC284244    | 0.0004 |
| C20orf112    | 0.0004 |
| SLBP         | 0.0004 |
| KRTAP4-7     | 0.0004 |
| SRSF4        | 0.0004 |
| UNC5B        | 0.0004 |
| DPF1         | 0.0004 |
| LOC441177    | 0.0004 |
| FAM149A      | 0.0004 |
| EHBP1L1      | 0.0004 |
| FILIP1       | 0.0004 |
| GEMIN2       | 0.0004 |
| WDR19        | 0.0004 |
| C5orf25      | 0.0004 |
| CCDC72       | 0.0004 |
| OTUB1        | 0.0004 |
| ALKBH8       | 0.0004 |
| CALCOCO2     | 0.0004 |
| NRIP2        | 0.0004 |
| USP27X       | 0.0004 |
| ARHGAP4      | 0.0004 |
| CDK13        | 0.0004 |
| ADAM19       | 0.0004 |
| PIDD         | 0.0004 |
| SYNPO2L      | 0.0004 |
| IRF4         | 0.0004 |
| LOC440292    | 0.0004 |
| LOC100131176 | 0.0004 |
| MGC16075     | 0.0004 |
| HAGHL        | 0.0004 |
| COL8A2       | 0.0004 |
| CCR3         | 0.0004 |
| ARHGAP20     | 0.0004 |
| DNALI1       | 0.0004 |
| PMCH         | 0.0004 |
| SIAE         | 0.0004 |
| MMP13        | 0.0004 |
| METTL10      | 0.0004 |
| GAD1         | 0.0004 |
| HMX1         | 0.0004 |
| SRRM1        | 0.0004 |
| DHX58        | 0.0004 |
| LOC100131195 | 0.0004 |
| AAGAB        | 0.0004 |
| SIRPB2       | 0.0004 |



|              |        |
|--------------|--------|
| CDCP2        | 0.0004 |
| NLRP8        | 0.0004 |
| PRRC2B       | 0.0004 |
| HPX          | 0.0004 |
| VMO1         | 0.0004 |
| CRISP1       | 0.0004 |
| H2AFX        | 0.0004 |
| ZNF35        | 0.0004 |
| SLC12A4      | 0.0004 |
| C2orf55      | 0.0004 |
| SOD3         | 0.0004 |
| OR51D1       | 0.0004 |
| TGM3         | 0.0004 |
| C2orf73      | 0.0004 |
| CCDC92       | 0.0004 |
| HHAT         | 0.0004 |
| SAFB2        | 0.0004 |
| DDX3X        | 0.0004 |
| BMP10        | 0.0004 |
| CD38         | 0.0004 |
| ADAMTSL3     | 0.0004 |
| BUB3         | 0.0004 |
| UIMC1        | 0.0004 |
| SH3BGRL      | 0.0004 |
| FLG          | 0.0004 |
| LOC100507475 | 0.0004 |
| OR2M2        | 0.0004 |
| BPIFB3       | 0.0004 |
| LOC729059    | 0.0004 |
| C10orf91     | 0.0004 |
| NUP50        | 0.0004 |
| LOC440335    | 0.0004 |
| SLURP1       | 0.0004 |
| GABRQ        | 0.0004 |
| PSD3         | 0.0004 |
| C12orf45     | 0.0004 |
| C18orf34     | 0.0004 |
| FRG1         | 0.0004 |
| ZNF649       | 0.0004 |
| RNF38        | 0.0004 |
| LITAF        | 0.0004 |
| PAFAH1B3     | 0.0004 |
| TOP2A        | 0.0004 |
| DKK4         | 0.0004 |
| TBC1D16      | 0.0004 |
| RALA         | 0.0004 |

|           |        |
|-----------|--------|
| BCL2L15   | 0.0004 |
| AQP8      | 0.0004 |
| CYB5R2    | 0.0004 |
| EME2      | 0.0004 |
| ITLN2     | 0.0004 |
| RNF150    | 0.0004 |
| GTF3A     | 0.0004 |
| TRIM66    | 0.0004 |
| KRT86     | 0.0004 |
| ARMCX4    | 0.0004 |
| TAS2R50   | 0.0004 |
| DIAPH1    | 0.0004 |
| CAMP      | 0.0004 |
| ZC3H6     | 0.0004 |
| PICK1     | 0.0004 |
| RNF141    | 0.0004 |
| SUPV3L1   | 0.0004 |
| TP53TG5   | 0.0004 |
| GARS      | 0.0004 |
| NPR1      | 0.0004 |
| DNMT3B    | 0.0004 |
| WBSCR27   | 0.0004 |
| TRPV6     | 0.0004 |
| HSD17B7   | 0.0004 |
| SLC23A2   | 0.0004 |
| OBFC2A    | 0.0004 |
| COL6A6    | 0.0004 |
| HIST1H2BD | 0.0004 |
| FBXL8     | 0.0004 |
| PURG      | 0.0004 |
| INO80C    | 0.0004 |
| BECN1     | 0.0004 |
| LOC96610  | 0.0004 |
| AKT2      | 0.0004 |
| ADRBK1    | 0.0004 |
| CPNE1     | 0.0004 |
| DFNB31    | 0.0004 |
| NSUN5P2   | 0.0004 |
| RDH12     | 0.0004 |
| ATP6V1C1  | 0.0004 |
| SPACA5    | 0.0004 |
| LMLN      | 0.0004 |
| FAM129B   | 0.0004 |
| HIST1H4E  | 0.0004 |
| SOHLH2    | 0.0004 |
| RPL26     | 0.0004 |

|              |        |
|--------------|--------|
| IQSEC2       | 0.0004 |
| GPSM2        | 0.0004 |
| TXNDC17      | 0.0004 |
| KLF11        | 0.0004 |
| C18orf21     | 0.0004 |
| BCAP31       | 0.0004 |
| ZNF286A      | 0.0004 |
| FCAR         | 0.0004 |
| CLDN7        | 0.0004 |
| FAM101A      | 0.0004 |
| CA7          | 0.0004 |
| C14orf183    | 0.0004 |
| ADSSL1       | 0.0004 |
| THNSL2       | 0.0004 |
| C17orf69     | 0.0004 |
| SALL1        | 0.0004 |
| SSBP2        | 0.0004 |
| TNKS         | 0.0004 |
| LRR1         | 0.0004 |
| LOC100287221 | 0.0004 |
| IL23R        | 0.0004 |
| FLRT3        | 0.0004 |
| NCK1         | 0.0004 |
| SNORD22      | 0.0004 |
| KIF20B       | 0.0004 |
| STAP2        | 0.0004 |
| DPYSL3       | 0.0004 |
| S100A11      | 0.0004 |
| RIT2         | 0.0004 |
| ADARB1       | 0.0004 |
| SLC44A1      | 0.0004 |
| CX3CR1       | 0.0004 |
| CXCR3        | 0.0004 |
| CORIN        | 0.0004 |
| MPL          | 0.0004 |
| LSM10        | 0.0004 |
| DEFA3        | 0.0004 |
| SDC2         | 0.0004 |
| MTRF1L       | 0.0004 |
| PI4KA        | 0.0004 |
| UBD          | 0.0004 |
| COL16A1      | 0.0004 |
| POP5         | 0.0004 |
| NSRP1        | 0.0004 |
| PRDM6        | 0.0004 |
| PER3         | 0.0004 |

|              |        |
|--------------|--------|
| PTPRD        | 0.0004 |
| CLMN         | 0.0004 |
| HRH4         | 0.0004 |
| VPS28        | 0.0004 |
| SLC45A3      | 0.0004 |
| CPB2         | 0.0004 |
| BVES         | 0.0004 |
| RLTPR        | 0.0004 |
| LOC284648    | 0.0004 |
| LOC100507494 | 0.0004 |
| DDX3Y        | 0.0004 |
| MRPL33       | 0.0004 |
| TCF15        | 0.0004 |
| GEMIN5       | 0.0004 |
| FLI1         | 0.0004 |
| FAM168B      | 0.0004 |
| UBAP2        | 0.0004 |
| KIAA0090     | 0.0004 |
| MT1X         | 0.0004 |
| LOC100132006 | 0.0004 |
| LTK          | 0.0004 |
| UGGT2        | 0.0004 |
| TMEM213      | 0.0004 |
| VASN         | 0.0004 |
| FAM22A       | 0.0004 |
| LOC100652876 | 0.0004 |
| ZIC3         | 0.0004 |
| C6orf223     | 0.0004 |
| C3orf14      | 0.0004 |
| TRUB1        | 0.0004 |
| PRPF19       | 0.0004 |
| BMPR2        | 0.0004 |
| RGS16        | 0.0004 |
| DUSP26       | 0.0004 |
| ENDOU        | 0.0004 |
| UBE2N        | 0.0004 |
| ASXL3        | 0.0004 |
| SOX10        | 0.0004 |
| FCHO1        | 0.0004 |
| CALML6       | 0.0004 |
| FRMD8        | 0.0004 |
| BAHD1        | 0.0004 |
| C10orf81     | 0.0004 |
| HLA-H        | 0.0004 |
| MPZ          | 0.0004 |
| LOC100505932 | 0.0004 |

|              |        |
|--------------|--------|
| FAM122C      | 0.0004 |
| DES          | 0.0004 |
| CYP2C18      | 0.0004 |
| C21orf59     | 0.0004 |
| TTL6         | 0.0004 |
| ZNF318       | 0.0004 |
| PIWIL2       | 0.0004 |
| VIPR2        | 0.0004 |
| GRN          | 0.0004 |
| C17orf49     | 0.0004 |
| EPB41L4A     | 0.0004 |
| METTL21B     | 0.0004 |
| PCNX         | 0.0004 |
| ZNF438       | 0.0004 |
| C18orf45     | 0.0004 |
| ATMIN        | 0.0004 |
| CERCAM       | 0.0004 |
| GGCX         | 0.0004 |
| LMNB2        | 0.0004 |
| LINC00256B   | 0.0004 |
| IFI27        | 0.0004 |
| LOC100128098 | 0.0004 |
| GNL1         | 0.0004 |
| PTPN5        | 0.0004 |
| CRK          | 0.0004 |
| NDN          | 0.0004 |
| FAM13C       | 0.0004 |
| SAT1         | 0.0004 |
| PIK3CG       | 0.0004 |
| DSCR6        | 0.0004 |
| ITPR1        | 0.0004 |
| MRAP2        | 0.0004 |
| GSG1         | 0.0004 |
| TRMT5        | 0.0004 |
| ZNF2         | 0.0004 |
| PABPC3       | 0.0004 |
| CHRA1        | 0.0004 |
| ELF3         | 0.0004 |
| DET1         | 0.0004 |
| GGT5         | 0.0004 |
| SLC34A2      | 0.0004 |
| C11orf71     | 0.0004 |
| HOXA5        | 0.0004 |
| NEUROD6      | 0.0004 |
| CNTN4        | 0.0004 |
| C19orf57     | 0.0004 |

|            |        |
|------------|--------|
| DPP4       | 0.0004 |
| GATA3      | 0.0004 |
| DYRK2      | 0.0004 |
| DBIL5P     | 0.0004 |
| LOC400684  | 0.0004 |
| DDIT4L     | 0.0004 |
| SPEN       | 0.0004 |
| WDR96      | 0.0004 |
| TMEM50A    | 0.0004 |
| SLC4A8     | 0.0004 |
| FMO2       | 0.0004 |
| EXOSC1     | 0.0004 |
| NEFL       | 0.0004 |
| PIGT       | 0.0004 |
| CDH23      | 0.0004 |
| SYTL5      | 0.0004 |
| TTY22      | 0.0004 |
| TMEM92     | 0.0004 |
| RAB11FIP3  | 0.0004 |
| CCDC75     | 0.0004 |
| MYL3       | 0.0004 |
| SSTR1      | 0.0004 |
| ADAMTS2    | 0.0004 |
| TIMM13     | 0.0004 |
| ZDHHC5     | 0.0004 |
| MAGEB10    | 0.0004 |
| CDK5R1     | 0.0004 |
| RBM22      | 0.0004 |
| FDPSL2A    | 0.0004 |
| ZNF778     | 0.0004 |
| ATF7IP     | 0.0004 |
| DIXDC1     | 0.0004 |
| SPRR2C     | 0.0004 |
| ZNF747     | 0.0004 |
| SMAD9      | 0.0004 |
| CCDC42B    | 0.0004 |
| HIST2H2AA4 | 0.0004 |
| GTPBP4     | 0.0004 |
| DMPK       | 0.0004 |
| UGGT1      | 0.0004 |
| FTL        | 0.0004 |
| LCORL      | 0.0004 |
| PSME2      | 0.0004 |
| PHTF2      | 0.0004 |
| RACGAP1    | 0.0004 |
| LOC339240  | 0.0004 |

|           |        |
|-----------|--------|
| SGPL1     | 0.0004 |
| ALKBH7    | 0.0004 |
| C5orf27   | 0.0004 |
| ANKRD42   | 0.0004 |
| MCM4      | 0.0004 |
| CBWD2     | 0.0004 |
| MOCS3     | 0.0004 |
| CBX2      | 0.0004 |
| LOC84856  | 0.0004 |
| EVC       | 0.0004 |
| IRF9      | 0.0004 |
| LRRC49    | 0.0004 |
| ETFDH     | 0.0004 |
| DNAJC9    | 0.0004 |
| CPEB1     | 0.0004 |
| SLC25A39  | 0.0004 |
| DCP1B     | 0.0004 |
| LOC151174 | 0.0004 |
| PROSER1   | 0.0004 |
| CSMD1     | 0.0004 |
| STK35     | 0.0004 |
| BTN3A1    | 0.0004 |
| DENND5A   | 0.0004 |
| ZNF200    | 0.0004 |
| SLAIN1    | 0.0004 |
| SERF1B    | 0.0004 |
| POLR2B    | 0.0004 |
| FOXA3     | 0.0004 |
| ARHGAP23  | 0.0004 |
| ZNF707    | 0.0004 |
| TULP1     | 0.0004 |
| AMMECR1L  | 0.0004 |
| ZNF93     | 0.0004 |
| FBXO45    | 0.0004 |
| ATP2C1    | 0.0004 |
| USP41     | 0.0004 |
| FAM47B    | 0.0004 |
| PSMB5     | 0.0004 |
| CNNM3     | 0.0004 |
| ARHGEF38  | 0.0004 |
| LOC729737 | 0.0004 |
| SERPINA3  | 0.0004 |
| C5orf50   | 0.0004 |
| FAM198B   | 0.0004 |
| TACR1     | 0.0004 |
| CLDN6     | 0.0004 |

|              |        |
|--------------|--------|
| KLHL9        | 0.0004 |
| FAM57A       | 0.0004 |
| CRYBB2P1     | 0.0004 |
| MRPL45       | 0.0004 |
| A1BG         | 0.0004 |
| SPDYE8P      | 0.0004 |
| AK8          | 0.0004 |
| LRFN4        | 0.0004 |
| OR1N2        | 0.0004 |
| EIF3L        | 0.0004 |
| UQCRC2       | 0.0004 |
| NOXA1        | 0.0004 |
| ERCC2        | 0.0004 |
| MUT          | 0.0004 |
| LOC100506922 | 0.0004 |
| ALDH3B2      | 0.0004 |
| IDI1         | 0.0004 |
| MYH1         | 0.0004 |
| HOXB5        | 0.0004 |
| LINC00115    | 0.0004 |
| FOLH1        | 0.0004 |
| DENND2C      | 0.0004 |
| LOC100505701 | 0.0004 |
| LOC100507460 | 0.0004 |
| MPP4         | 0.0004 |
| BTG1         | 0.0004 |
| PLA2G2D      | 0.0004 |
| IQCF1        | 0.0004 |
| WNT3         | 0.0004 |
| LY86         | 0.0004 |
| MYBPC1       | 0.0004 |
| FDFT1        | 0.0004 |
| FAM206A      | 0.0004 |
| HSD17B12     | 0.0004 |
| STAR         | 0.0004 |
| VDAC2        | 0.0004 |
| FUT5         | 0.0004 |
| KNR1         | 0.0004 |
| TRIM43       | 0.0004 |
| ZNF503-AS1   | 0.0004 |
| MAS1L        | 0.0004 |
| HLA-DQB1     | 0.0004 |
| DAXX         | 0.0004 |
| TM9SF1       | 0.0004 |
| C2CD3        | 0.0004 |
| XPOT         | 0.0004 |



|              |        |
|--------------|--------|
| HTT          | 0.0004 |
| LOC728485    | 0.0004 |
| NT5E         | 0.0004 |
| ND2          | 0.0004 |
| WFDC13       | 0.0004 |
| JARID2       | 0.0004 |
| DUOX1        | 0.0004 |
| MAMDC4       | 0.0004 |
| PLK3         | 0.0004 |
| ZNF516       | 0.0004 |
| SGCD         | 0.0004 |
| LOC157860    | 0.0004 |
| SULF2        | 0.0004 |
| GNAO1        | 0.0004 |
| HTRA3        | 0.0004 |
| RGS13        | 0.0004 |
| FLJ36000     | 0.0004 |
| MNDA         | 0.0004 |
| GPR52        | 0.0004 |
| VPS29        | 0.0004 |
| TOMM5        | 0.0004 |
| SUPT16H      | 0.0004 |
| CYP2U1       | 0.0004 |
| APLP1        | 0.0004 |
| GALNT7       | 0.0004 |
| LOC441052    | 0.0004 |
| FLJ25328     | 0.0004 |
| PQLC2        | 0.0004 |
| LINC00301    | 0.0004 |
| APOC2        | 0.0004 |
| KRTAP15-1    | 0.0004 |
| MEN1         | 0.0004 |
| HS6ST2       | 0.0004 |
| RIMS2        | 0.0004 |
| NEK4         | 0.0004 |
| PLEK         | 0.0004 |
| OR7D4        | 0.0004 |
| RGS10        | 0.0004 |
| TM9SF4       | 0.0004 |
| GLRA4        | 0.0004 |
| MT1L         | 0.0004 |
| SH3BGRL3     | 0.0004 |
| FKBP6        | 0.0004 |
| LOC100270680 | 0.0004 |
| CLDN2        | 0.0004 |
| PSMD9        | 0.0004 |

|              |        |
|--------------|--------|
| CCS          | 0.0004 |
| SPNS3        | 0.0004 |
| BASP1        | 0.0004 |
| CAPS         | 0.0004 |
| LBP          | 0.0004 |
| XCL2         | 0.0004 |
| FLJ38379     | 0.0004 |
| UTP3         | 0.0004 |
| C7           | 0.0004 |
| RAG1         | 0.0004 |
| PTGS2        | 0.0004 |
| PRSS33       | 0.0004 |
| ATP10A       | 0.0004 |
| GADD45B      | 0.0004 |
| ATP9A        | 0.0004 |
| TNFSF4       | 0.0004 |
| LOC100505783 | 0.0004 |
| PPP1R42      | 0.0004 |
| SCRIB        | 0.0004 |
| LOC643988    | 0.0004 |
| LOC100506540 | 0.0004 |
| CCNB1        | 0.0004 |
| RNF31        | 0.0004 |
| UBA2         | 0.0004 |
| GRIN3A       | 0.0004 |
| CDR1         | 0.0004 |
| MPPE1        | 0.0004 |
| IFFO1        | 0.0004 |
| TGFB1I1      | 0.0004 |
| YY1          | 0.0004 |
| ATP5H        | 0.0004 |
| NR4A1        | 0.0004 |
| LOC100288198 | 0.0004 |
| ZFYVE20      | 0.0004 |
| LOC100128361 | 0.0004 |
| REPIN1       | 0.0004 |
| CNDP1        | 0.0004 |
| PLEK2        | 0.0004 |
| C22orf29     | 0.0004 |
| CUX1         | 0.0004 |
| C19orf69     | 0.0004 |
| MCF2         | 0.0004 |
| PKMYT1       | 0.0004 |
| ACTB         | 0.0004 |
| C3orf54      | 0.0004 |
| ARSB         | 0.0004 |

|              |        |
|--------------|--------|
| FBXL7        | 0.0004 |
| UBQLN4       | 0.0004 |
| CACNG8       | 0.0004 |
| ZNF385B      | 0.0004 |
| DHX34        | 0.0004 |
| SLC26A4      | 0.0004 |
| DUOX2        | 0.0004 |
| OPCML        | 0.0004 |
| NLN          | 0.0004 |
| LOC100505619 | 0.0004 |
| SLC22A8      | 0.0004 |
| CNBP         | 0.0004 |
| PAIP2B       | 0.0004 |
| SNX9         | 0.0004 |
| TMSB15B      | 0.0004 |
| LOC100289255 | 0.0004 |
| NXF2         | 0.0004 |
| PLIN2        | 0.0004 |
| CENPM        | 0.0004 |
| LSS          | 0.0004 |
| PTP4A1       | 0.0004 |
| CALHM1       | 0.0004 |
| FBXO15       | 0.0004 |
| RAB3IP       | 0.0004 |
| DEPDC5       | 0.0004 |
| SPAG6        | 0.0004 |
| DKFZP434H168 | 0.0004 |
| ADAMTS1      | 0.0004 |
| UPP2         | 0.0004 |
| PPIL2        | 0.0004 |
| ZNF697       | 0.0004 |
| IGSF3        | 0.0004 |
| CENPF        | 0.0004 |
| TSPYL2       | 0.0004 |
| MRPS25       | 0.0004 |
| HARS         | 0.0004 |
| TMEM217      | 0.0004 |
| CXorf65      | 0.0004 |
| DSEL         | 0.0004 |
| AMDHD1       | 0.0004 |
| RS1          | 0.0004 |
| C3orf49      | 0.0004 |
| SULT1C4      | 0.0004 |
| FLJ40606     | 0.0004 |
| CCDC37       | 0.0004 |
| ETV1         | 0.0004 |

|              |        |
|--------------|--------|
| ST6GALNAC1   | 0.0004 |
| ZNF772       | 0.0004 |
| SYT8         | 0.0004 |
| GBA3         | 0.0004 |
| EXOC6B       | 0.0004 |
| NFE2         | 0.0004 |
| CSDE1        | 0.0004 |
| C20orf30     | 0.0004 |
| REPS1        | 0.0004 |
| LOC283174    | 0.0004 |
| PRKAR2A      | 0.0004 |
| TUBA1B       | 0.0004 |
| FAM159A      | 0.0004 |
| TRUB2        | 0.0004 |
| MITF         | 0.0004 |
| FLJ90757     | 0.0004 |
| SPAG17       | 0.0004 |
| NUSAP1       | 0.0004 |
| OSR2         | 0.0004 |
| PPP1R13L     | 0.0004 |
| NUDCD2       | 0.0004 |
| FAAH         | 0.0004 |
| IL36A        | 0.0004 |
| CROCCP3      | 0.0004 |
| BEND4        | 0.0004 |
| ETF1         | 0.0004 |
| HCP5         | 0.0004 |
| LOC646808    | 0.0004 |
| FOXN4        | 0.0004 |
| AKIP1        | 0.0004 |
| LOC100130193 | 0.0004 |
| PLXNB3       | 0.0004 |
| C8orf12      | 0.0004 |
| FAM3A        | 0.0004 |
| DSG1         | 0.0004 |
| DAPP1        | 0.0004 |
| HIST1H2AD    | 0.0004 |
| TBX5         | 0.0004 |
| NAGK         | 0.0004 |
| FGF1         | 0.0004 |
| FOLR4        | 0.0004 |
| RPS2P32      | 0.0004 |
| ING2         | 0.0004 |
| FLJ31356     | 0.0004 |
| TMEM231      | 0.0004 |
| DEFA1        | 0.0004 |

|              |        |
|--------------|--------|
| AIM2         | 0.0004 |
| ROCK1P1      | 0.0004 |
| IFITM5       | 0.0004 |
| KCTD3        | 0.0004 |
| GSTM1        | 0.0004 |
| RBMY2FP      | 0.0004 |
| RPTOR        | 0.0004 |
| AMIGO3       | 0.0004 |
| PRC1         | 0.0004 |
| SART3        | 0.0004 |
| PTK2         | 0.0004 |
| ZNF566       | 0.0004 |
| SYP          | 0.0004 |
| GGA3         | 0.0004 |
| LTB          | 0.0004 |
| CDKN2AIP     | 0.0004 |
| TGFB3        | 0.0004 |
| LGALS1       | 0.0004 |
| C6orf10      | 0.0004 |
| C2orf72      | 0.0004 |
| TMEM136      | 0.0004 |
| OTOA         | 0.0004 |
| KCNA6        | 0.0004 |
| HPS4         | 0.0004 |
| PRDM9        | 0.0004 |
| SSBP1        | 0.0004 |
| UPF3B        | 0.0004 |
| HK2          | 0.0004 |
| LOC100506253 | 0.0004 |
| PLEKHO1      | 0.0004 |
| HMGB3P1      | 0.0004 |
| IL4R         | 0.0004 |
| FLJ23867     | 0.0004 |
| TMEM69       | 0.0004 |
| ATP1B4       | 0.0004 |
| RAMP3        | 0.0004 |
| CALM1        | 0.0004 |
| SPIN1        | 0.0004 |
| DNAJB6       | 0.0004 |
| ZSCAN1       | 0.0004 |
| SLC27A4      | 0.0004 |
| UCN          | 0.0004 |
| CSNK2A1      | 0.0004 |
| PRRG1        | 0.0004 |
| ABCA6        | 0.0004 |
| ZBTB7B       | 0.0004 |

|              |        |
|--------------|--------|
| SCG2         | 0.0004 |
| GJC3         | 0.0004 |
| LOC439914    | 0.0004 |
| FBXL20       | 0.0004 |
| LOC727849    | 0.0004 |
| RPS23        | 0.0004 |
| KREMEN2      | 0.0004 |
| TMEM53       | 0.0004 |
| MYT1         | 0.0004 |
| RASA1        | 0.0004 |
| SELK         | 0.0004 |
| ProSAPiP1    | 0.0004 |
| DRD4         | 0.0004 |
| GDAP1L1      | 0.0004 |
| LRRC37BP1    | 0.0004 |
| DNAJC28      | 0.0004 |
| LOC100133050 | 0.0004 |
| SPATA4       | 0.0004 |
| PWWP2A       | 0.0004 |
| BTNL9        | 0.0004 |
| METTL15      | 0.0004 |
| COPZ2        | 0.0004 |
| TMEM185A     | 0.0004 |
| PRELID2      | 0.0004 |
| PRKD3        | 0.0004 |
| RAMP1        | 0.0004 |
| LIPT2        | 0.0004 |
| STAB2        | 0.0004 |
| RAB3C        | 0.0004 |
| LUC7L2       | 0.0004 |
| PPAN-P2RY11  | 0.0004 |
| FOXP1        | 0.0004 |
| HAVCR2       | 0.0004 |
| C1orf170     | 0.0004 |
| GLRX3        | 0.0004 |
| FAM129C      | 0.0004 |
| HIST1H3B     | 0.0004 |
| DDX18        | 0.0004 |
| GSTA4        | 0.0004 |
| SLC45A2      | 0.0004 |
| NPNT         | 0.0004 |
| KIF20A       | 0.0004 |
| LOC153546    | 0.0004 |
| ZNF830       | 0.0004 |
| RCBTB1       | 0.0004 |
| EPO          | 0.0004 |

|              |        |
|--------------|--------|
| MAPRE2       | 0.0004 |
| CYP4F22      | 0.0004 |
| TBL1X        | 0.0004 |
| MAP9         | 0.0004 |
| FLRT1        | 0.0004 |
| CACNG1       | 0.0004 |
| SLC3A2       | 0.0004 |
| TLX1         | 0.0004 |
| C12orf39     | 0.0004 |
| DAZ2         | 0.0004 |
| ATAD2        | 0.0004 |
| GPR35        | 0.0004 |
| SGCG         | 0.0004 |
| CXCR4        | 0.0004 |
| ARL6         | 0.0004 |
| LRP2BP       | 0.0004 |
| HIST1H4G     | 0.0004 |
| MTMR2        | 0.0004 |
| SH3YL1       | 0.0004 |
| PTTG1        | 0.0004 |
| LOC730091    | 0.0004 |
| SSX5         | 0.0004 |
| FAM24B       | 0.0004 |
| VTI1A        | 0.0004 |
| GIN51        | 0.0004 |
| TCF7L1       | 0.0004 |
| TGFBRAP1     | 0.0004 |
| TMEM19       | 0.0004 |
| NPRL2        | 0.0004 |
| EXOC3L2      | 0.0004 |
| RIPK1        | 0.0004 |
| ANKRD37      | 0.0004 |
| TMEM198      | 0.0004 |
| DOM3Z        | 0.0004 |
| C5orf20      | 0.0004 |
| C17orf72     | 0.0004 |
| UGT2B28      | 0.0004 |
| DEFA4        | 0.0004 |
| SMUG1        | 0.0004 |
| CYP2E1       | 0.0004 |
| C2orf40      | 0.0004 |
| CUL9         | 0.0004 |
| AVL9         | 0.0004 |
| C7orf26      | 0.0004 |
| NCAPD3       | 0.0004 |
| LOC100129361 | 0.0004 |

|              |        |
|--------------|--------|
| COL4A6       | 0.0004 |
| RPL35A       | 0.0004 |
| TP73         | 0.0004 |
| ITPKA        | 0.0004 |
| PDE9A        | 0.0004 |
| PKIB         | 0.0004 |
| ANXA2P1      | 0.0004 |
| ALG12        | 0.0004 |
| MKL1         | 0.0004 |
| ING5         | 0.0004 |
| ITGA10       | 0.0004 |
| PDCD1        | 0.0004 |
| TMEM8B       | 0.0004 |
| NHLRC3       | 0.0004 |
| DLEU1        | 0.0004 |
| CCT4         | 0.0004 |
| LOC100507948 | 0.0004 |
| RWDD3        | 0.0004 |
| PRDX2        | 0.0004 |
| DSTN         | 0.0004 |
| RPS26        | 0.0004 |
| USP22        | 0.0004 |
| LDHB         | 0.0004 |
| LPHN1        | 0.0004 |
| AMDHD2       | 0.0004 |
| CXCL11       | 0.0004 |
| DOCK7        | 0.0004 |
| MLXIPL       | 0.0004 |
| CDCA2        | 0.0004 |
| METAP1D      | 0.0004 |
| GPATCH4      | 0.0004 |
| C19orf6      | 0.0004 |
| KAT6A        | 0.0004 |
| TMPRSS11F    | 0.0004 |
| MTMR9        | 0.0004 |
| BHMT2        | 0.0004 |
| HOTTIP       | 0.0004 |
| LCA5L        | 0.0004 |
| RHBDF2       | 0.0004 |
| TAAR6        | 0.0004 |
| ROBO1        | 0.0004 |
| DHCR24       | 0.0004 |
| LOC100507066 | 0.0004 |
| LOC641298    | 0.0004 |
| CNPPD1       | 0.0004 |
| RASAL3       | 0.0004 |



|              |        |
|--------------|--------|
| ZNF683       | 0.0004 |
| EPB41L4A-AS1 | 0.0004 |
| IRF7         | 0.0004 |
| TMEM68       | 0.0004 |
| PCDHB1       | 0.0004 |
| SLC27A2      | 0.0004 |
| STON1        | 0.0004 |
| TPK1         | 0.0004 |
| MYO5A        | 0.0004 |
| LOC100506473 | 0.0004 |
| VNN2         | 0.0004 |
| NINL         | 0.0004 |
| FBLN7        | 0.0004 |
| EDC3         | 0.0004 |
| OR2A7        | 0.0004 |
| ABCD4        | 0.0004 |
| SOX3         | 0.0004 |
| CD160        | 0.0004 |
| FBXO38       | 0.0004 |
| ZBTB2        | 0.0004 |
| GPR34        | 0.0004 |
| ONECUT1      | 0.0004 |
| ANXA13       | 0.0004 |
| NSD1         | 0.0004 |
| SHKBP1       | 0.0004 |
| ADRB3        | 0.0004 |
| RNF19B       | 0.0004 |
| DUSP5P       | 0.0004 |
| XPO1         | 0.0004 |
| GRM2         | 0.0004 |
| C10orf54     | 0.0004 |
| CD52         | 0.0004 |
| PCDHGA3      | 0.0004 |
| PCDH9        | 0.0004 |
| BCRP2        | 0.0004 |
| DDX60        | 0.0004 |
| LOC646976    | 0.0004 |
| WBP2NL       | 0.0004 |
| C10orf25     | 0.0004 |
| SQSTM1       | 0.0004 |
| RPL6         | 0.0004 |
| ANKUB1       | 0.0004 |
| BCAS4        | 0.0004 |
| CSNK1G2      | 0.0004 |
| C11orf75     | 0.0004 |
| MST1         | 0.0004 |

|          |        |
|----------|--------|
| ILKAP    | 0.0004 |
| PYROXD2  | 0.0004 |
| SLC5A10  | 0.0004 |
| HPGDS    | 0.0004 |
| POLR1B   | 0.0004 |
| IL1RL1   | 0.0004 |
| SMCR7L   | 0.0004 |
| CTTN     | 0.0004 |
| KRTAP9-2 | 0.0004 |
| REXO1    | 0.0004 |
| PAPPA    | 0.0004 |
| PTF1A    | 0.0004 |
| HEATR5B  | 0.0004 |
| C2orf80  | 0.0004 |
| ZNF557   | 0.0004 |
| IRAK1    | 0.0004 |
| CLEC2L   | 0.0004 |
| CPA6     | 0.0004 |
| MLN      | 0.0004 |
| CCDC149  | 0.0004 |
| ABCC3    | 0.0004 |
| EPHB1    | 0.0004 |
| NDUFA6   | 0.0004 |
| LPCAT4   | 0.0004 |
| MID1IP1  | 0.0004 |
| MAGIX    | 0.0004 |
| CHP2     | 0.0004 |
| AK7      | 0.0004 |
| TMEM110  | 0.0004 |
| KIAA0141 | 0.0004 |
| LIPA     | 0.0004 |
| FLJ32742 | 0.0004 |
| TXN      | 0.0004 |
| CYP4A11  | 0.0004 |
| SMPD2    | 0.0004 |
| WBSCR16  | 0.0004 |
| MRPL47   | 0.0004 |
| TUBA1C   | 0.0004 |
| AJAP1    | 0.0004 |
| WNK4     | 0.0004 |
| TINF2    | 0.0004 |
| CDK7     | 0.0004 |
| FAN1     | 0.0004 |
| PF4      | 0.0004 |
| FLJ35946 | 0.0004 |
| LRRK2    | 0.0004 |

|              |        |
|--------------|--------|
| FDXACB1      | 0.0004 |
| PPP6C        | 0.0004 |
| LSP1         | 0.0004 |
| SSBP4        | 0.0004 |
| DYNLT1       | 0.0004 |
| FAAH2        | 0.0004 |
| USP31        | 0.0004 |
| MECOM        | 0.0004 |
| PBXIP1       | 0.0004 |
| NPM2         | 0.0004 |
| RPL13        | 0.0004 |
| TMEM194A     | 0.0004 |
| NCOA5        | 0.0004 |
| PMEPA1       | 0.0004 |
| PLXNA3       | 0.0004 |
| TAS2R19      | 0.0004 |
| APCS         | 0.0004 |
| LYN          | 0.0004 |
| MLC1         | 0.0004 |
| KLK15        | 0.0004 |
| GTSF1        | 0.0004 |
| SH3BP4       | 0.0004 |
| TBL2         | 0.0004 |
| MANF         | 0.0004 |
| PAX9         | 0.0004 |
| ZNF326       | 0.0004 |
| IL24         | 0.0004 |
| RASIP1       | 0.0004 |
| C3orf20      | 0.0004 |
| DYRK1A       | 0.0004 |
| PRKAB2       | 0.0004 |
| STRA8        | 0.0004 |
| ACVR2B       | 0.0004 |
| C17orf90     | 0.0004 |
| C4orf26      | 0.0004 |
| CPA4         | 0.0004 |
| TRIM42       | 0.0004 |
| LOC100129397 | 0.0004 |
| RBM28        | 0.0004 |
| LHFPL3       | 0.0004 |
| TMEM132D     | 0.0004 |
| ASPN         | 0.0004 |
| H3F3A        | 0.0004 |
| PPP1R3C      | 0.0004 |
| STMN1        | 0.0004 |
| ATP2B3       | 0.0004 |

|              |        |
|--------------|--------|
| UFM1         | 0.0004 |
| ZNF274       | 0.0004 |
| CPT1C        | 0.0004 |
| SAT2         | 0.0004 |
| CHMP2B       | 0.0004 |
| CHST2        | 0.0004 |
| LOC100507360 | 0.0004 |
| RHOF         | 0.0004 |
| SPESP1       | 0.0004 |
| SNRPD1       | 0.0004 |
| SP2          | 0.0004 |
| PDZD4        | 0.0004 |
| ANKRD2       | 0.0004 |
| AGPS         | 0.0004 |
| FCHSD2       | 0.0004 |
| LOC645676    | 0.0004 |
| TSPEAR       | 0.0004 |
| DDX10        | 0.0004 |
| LOC100125556 | 0.0004 |
| C5orf35      | 0.0004 |
| SOX11        | 0.0004 |
| CCL18        | 0.0004 |
| DMRTA1       | 0.0004 |
| PSMB8        | 0.0004 |
| MC4R         | 0.0004 |
| TREML3       | 0.0004 |
| LOC648771    | 0.0004 |
| ADAMTS9      | 0.0004 |
| ECHDC1       | 0.0004 |
| ADCY7        | 0.0004 |
| TMBIM6       | 0.0004 |
| MAGEA1       | 0.0004 |
| SYNE1        | 0.0004 |
| GCG          | 0.0004 |
| GXYLT2       | 0.0004 |
| FRMPD4       | 0.0004 |
| LINC00317    | 0.0004 |
| HERC1        | 0.0004 |
| HDC          | 0.0004 |
| CPA1         | 0.0004 |
| REEP3        | 0.0004 |
| TNFSF18      | 0.0004 |
| LOC100133106 | 0.0004 |
| TMEM70       | 0.0004 |
| ARHGDIA      | 0.0004 |
| ZSCAN22      | 0.0004 |

|              |        |
|--------------|--------|
| PPRC1        | 0.0004 |
| B3GALT4      | 0.0004 |
| UBE2D1       | 0.0004 |
| EMID2        | 0.0004 |
| TSKU         | 0.0004 |
| LOC100506955 | 0.0004 |
| ITGB3BP      | 0.0003 |
| KIAA1683     | 0.0003 |
| RGS8         | 0.0003 |
| HMG2         | 0.0003 |
| PRRT3        | 0.0003 |
| KIAA1908     | 0.0003 |
| ZNF394       | 0.0003 |
| DMKN         | 0.0003 |
| LOC100509490 | 0.0003 |
| FAM20C       | 0.0003 |
| DIDO1        | 0.0003 |
| CLEC18A      | 0.0003 |
| KIAA0485     | 0.0003 |
| SNX32        | 0.0003 |
| TNNI3K       | 0.0003 |
| CRISP2       | 0.0003 |
| HIST3H3      | 0.0003 |
| F13A1        | 0.0003 |
| CTSD         | 0.0003 |
| ACO2         | 0.0003 |
| GIN5         | 0.0003 |
| PPME1        | 0.0003 |
| ZRANB3       | 0.0003 |
| GJA4         | 0.0003 |
| PPBP         | 0.0003 |
| C9orf23      | 0.0003 |
| ZNF335       | 0.0003 |
| ITGB4        | 0.0003 |
| FAM125B      | 0.0003 |
| ING1         | 0.0003 |
| LOC255177    | 0.0003 |
| LOC100128239 | 0.0003 |
| C3orf80      | 0.0003 |
| UBQLNL       | 0.0003 |
| TBC1D30      | 0.0003 |
| RNASE3       | 0.0003 |
| ANXA9        | 0.0003 |
| KIT          | 0.0003 |
| FBXL5        | 0.0003 |
| HECTD2       | 0.0003 |

|            |        |
|------------|--------|
| C18orf15   | 0.0003 |
| ACOX2      | 0.0003 |
| MFGE8      | 0.0003 |
| LMBRD2     | 0.0003 |
| RNASE7     | 0.0003 |
| PPP1R14C   | 0.0003 |
| KIAA0040   | 0.0003 |
| BFAR       | 0.0003 |
| CORO2A     | 0.0003 |
| COX4I1     | 0.0003 |
| SF3A2      | 0.0003 |
| C11orf44   | 0.0003 |
| HK3        | 0.0003 |
| QDPR       | 0.0003 |
| BTN1A1     | 0.0003 |
| HRASLS     | 0.0003 |
| CCNI       | 0.0003 |
| TMEM81     | 0.0003 |
| POLR2M     | 0.0003 |
| TSEN34     | 0.0003 |
| S100A4     | 0.0003 |
| TBC1D12    | 0.0003 |
| PARP8      | 0.0003 |
| PRDM1      | 0.0003 |
| C9orf64    | 0.0003 |
| LRP10      | 0.0003 |
| GSTO1      | 0.0003 |
| SLC15A3    | 0.0003 |
| CKMT1A     | 0.0003 |
| HAX1       | 0.0003 |
| HECW2      | 0.0003 |
| ARNTL      | 0.0003 |
| DSCC1      | 0.0003 |
| NLGN2      | 0.0003 |
| ARL11      | 0.0003 |
| SEPSECS    | 0.0003 |
| CXCL12     | 0.0003 |
| TUBAL3     | 0.0003 |
| COX16      | 0.0003 |
| MSL2       | 0.0003 |
| TOX        | 0.0003 |
| MYLK       | 0.0003 |
| C1orf180   | 0.0003 |
| IMPAD1     | 0.0003 |
| ERVMER34-1 | 0.0003 |
| PSORS1C1   | 0.0003 |

|              |        |
|--------------|--------|
| MAN1C1       | 0.0003 |
| TMEM125      | 0.0003 |
| FADS1        | 0.0003 |
| QKI          | 0.0003 |
| LILRA4       | 0.0003 |
| BIN1         | 0.0003 |
| ABCC13       | 0.0003 |
| PRKG1        | 0.0003 |
| ZNF676       | 0.0003 |
| MEST         | 0.0003 |
| ZEB1         | 0.0003 |
| SMOX         | 0.0003 |
| MED8         | 0.0003 |
| MRGPRX2      | 0.0003 |
| APOL1        | 0.0003 |
| ITGB6        | 0.0003 |
| OR7E91P      | 0.0003 |
| PAM          | 0.0003 |
| ULBP2        | 0.0003 |
| DENND1A      | 0.0003 |
| C17orf42     | 0.0003 |
| TBC1D2B      | 0.0003 |
| SUPT6H       | 0.0003 |
| ST6GAL2      | 0.0003 |
| HIST1H3E     | 0.0003 |
| HIST2H2BC    | 0.0003 |
| LOC100509498 | 0.0003 |
| LOC100507303 | 0.0003 |
| ITFG2        | 0.0003 |
| ABCF3        | 0.0003 |
| KCNJ9        | 0.0003 |
| C8orf66      | 0.0003 |
| BCL9         | 0.0003 |
| KRT16        | 0.0003 |
| IDH1         | 0.0003 |
| SPPL3        | 0.0003 |
| NIPBL        | 0.0003 |
| RTKN         | 0.0003 |
| BZW2         | 0.0003 |
| MICU1        | 0.0003 |
| ESM1         | 0.0003 |
| SEC13        | 0.0003 |
| NPC1         | 0.0003 |
| CEP76        | 0.0003 |
| LOC100507186 | 0.0003 |
| KCNJ10       | 0.0003 |

|              |        |
|--------------|--------|
| LIPH         | 0.0003 |
| NUDT11       | 0.0003 |
| CAST         | 0.0003 |
| LOC284260    | 0.0003 |
| DNAJC8       | 0.0003 |
| MYO9A        | 0.0003 |
| SIGLEC1      | 0.0003 |
| FNIP1        | 0.0003 |
| ATXN2        | 0.0003 |
| CTTNBP2NL    | 0.0003 |
| KIAA0232     | 0.0003 |
| HGD          | 0.0003 |
| DMBX1        | 0.0003 |
| STRADB       | 0.0003 |
| DNAJB3       | 0.0003 |
| MGRN1        | 0.0003 |
| RAB25        | 0.0003 |
| C11orf57     | 0.0003 |
| LINC00152    | 0.0003 |
| TNPO3        | 0.0003 |
| C1orf111     | 0.0003 |
| SPAG1        | 0.0003 |
| CCDC56       | 0.0003 |
| ZNF585A      | 0.0003 |
| GLCC1        | 0.0003 |
| CHRNA1       | 0.0003 |
| FAM160A2     | 0.0003 |
| HRASLS5      | 0.0003 |
| NPTX1        | 0.0003 |
| CAHM         | 0.0003 |
| TMEM216      | 0.0003 |
| DDAH2        | 0.0003 |
| CYSLTR1      | 0.0003 |
| SLC25A30     | 0.0003 |
| ATF7         | 0.0003 |
| LOC100507431 | 0.0003 |
| ARX          | 0.0003 |
| FLJ33360     | 0.0003 |
| MICB         | 0.0003 |
| TRIB3        | 0.0003 |
| FLJ27352     | 0.0003 |
| FAM150B      | 0.0003 |
| ICMT         | 0.0003 |
| NACC1        | 0.0003 |
| CDHR5        | 0.0003 |
| TRHR         | 0.0003 |



|              |        |
|--------------|--------|
| LOC100130744 | 0.0003 |
| ZNF295       | 0.0003 |
| FAM71F1      | 0.0003 |
| RAB23        | 0.0003 |
| TBCEL        | 0.0003 |
| RPL41        | 0.0003 |
| ACSF2        | 0.0003 |
| FGF11        | 0.0003 |
| TANC1        | 0.0003 |
| SLC9A3       | 0.0003 |
| OTC          | 0.0003 |
| GPR63        | 0.0003 |
| CD63         | 0.0003 |
| TAPT1        | 0.0003 |
| WFDC9        | 0.0003 |
| INHA         | 0.0003 |
| EIF1         | 0.0003 |
| TPST1        | 0.0003 |
| SLC27A5      | 0.0003 |
| FLJ33996     | 0.0003 |
| STARD10      | 0.0003 |
| RPF1         | 0.0003 |
| FKSG43       | 0.0003 |
| C12orf4      | 0.0003 |
| CCDC153      | 0.0003 |
| NANOS3       | 0.0003 |
| HTATSF1P2    | 0.0003 |
| SHE          | 0.0003 |
| SLC8A2       | 0.0003 |
| AGAP10       | 0.0003 |
| TRPC5        | 0.0003 |
| GLYAT        | 0.0003 |
| GCHFR        | 0.0003 |
| SCN11A       | 0.0003 |
| DPY30        | 0.0003 |
| GZMM         | 0.0003 |
| PRB1         | 0.0003 |
| DCHS1        | 0.0003 |
| MRPL4        | 0.0003 |
| CPSF4        | 0.0003 |
| PLEKHG3      | 0.0003 |
| 5-Mar        | 0.0003 |
| C1orf88      | 0.0003 |
| PTPRC        | 0.0003 |
| WNT7B        | 0.0003 |
| LRPPRC       | 0.0003 |

|              |        |
|--------------|--------|
| NDUFS1       | 0.0003 |
| MDH1B        | 0.0003 |
| PRSS54       | 0.0003 |
| LYVE1        | 0.0003 |
| LOC100169752 | 0.0003 |
| TMED6        | 0.0003 |
| CCNYL1       | 0.0003 |
| FADS2        | 0.0003 |
| LOC401320    | 0.0003 |
| PER1         | 0.0003 |
| FLJ25694     | 0.0003 |
| SP8          | 0.0003 |
| C17orf76-AS1 | 0.0003 |
| KCNE1        | 0.0003 |
| FKBP14       | 0.0003 |
| C8orf22      | 0.0003 |
| PTPLA        | 0.0003 |
| TDRD12       | 0.0003 |
| DIO1         | 0.0003 |
| NFAM1        | 0.0003 |
| BCL6B        | 0.0003 |
| PHB2         | 0.0003 |
| GPX8         | 0.0003 |
| SNX1         | 0.0003 |
| METTL12      | 0.0003 |
| CX3CL1       | 0.0003 |
| CCL13        | 0.0003 |
| UCKL1        | 0.0003 |
| ADAMTS18     | 0.0003 |
| GUCA1C       | 0.0003 |
| CNNM1        | 0.0003 |
| ADCYAP1R1    | 0.0003 |
| FAM154A      | 0.0003 |
| SPACA3       | 0.0003 |
| SERPINC1     | 0.0003 |
| ELFN2        | 0.0003 |
| KLHL30       | 0.0003 |
| CD1B         | 0.0003 |
| LOC441204    | 0.0003 |
| C10orf122    | 0.0003 |
| CCDC59       | 0.0003 |
| XRCC1        | 0.0003 |
| FEZ1         | 0.0003 |
| ZNF571       | 0.0003 |
| SOX4         | 0.0003 |
| MARCKSL1     | 0.0003 |

|              |        |
|--------------|--------|
| LOC100507398 | 0.0003 |
| VCP          | 0.0003 |
| ANKRD32      | 0.0003 |
| NCAPD2       | 0.0003 |
| BRWD1        | 0.0003 |
| FLJ21408     | 0.0003 |
| CAMK2N1      | 0.0003 |
| KCNN2        | 0.0003 |
| TMEM237      | 0.0003 |
| HSPB3        | 0.0003 |
| NRG4         | 0.0003 |
| TNFSF14      | 0.0003 |
| LOC100289396 | 0.0003 |
| ABCA7        | 0.0003 |
| ZNF681       | 0.0003 |
| LY6G5B       | 0.0003 |
| ABCB4        | 0.0003 |
| FXYD7        | 0.0003 |
| PCDH7        | 0.0003 |
| STX17        | 0.0003 |
| HMG3         | 0.0003 |
| TLL2         | 0.0003 |
| PDE1A        | 0.0003 |
| OR2A14       | 0.0003 |
| FLJ37035     | 0.0003 |
| DGKB         | 0.0003 |
| RPP38        | 0.0003 |
| PDSS1        | 0.0003 |
| LYPD6B       | 0.0003 |
| KCNK4        | 0.0003 |
| KNCN         | 0.0003 |
| UNC50        | 0.0003 |
| RGS3         | 0.0003 |
| CXCL6        | 0.0003 |
| RNF19A       | 0.0003 |
| RAD54L2      | 0.0003 |
| GRPEL1       | 0.0003 |
| SCN1A        | 0.0003 |
| LAMA1        | 0.0003 |
| DEFB126      | 0.0003 |
| WDR27        | 0.0003 |
| BPIFA3       | 0.0003 |
| ALDOC        | 0.0003 |
| DDX27        | 0.0003 |
| CYTB         | 0.0003 |
| RAP1B        | 0.0003 |

|              |        |
|--------------|--------|
| PGBD2        | 0.0003 |
| FSD1         | 0.0003 |
| SCMH1        | 0.0003 |
| HIATL1       | 0.0003 |
| LOC100505933 | 0.0003 |
| ALG5         | 0.0003 |
| GPR172A      | 0.0003 |
| LOC285696    | 0.0003 |
| EPG5         | 0.0003 |
| ETHE1        | 0.0003 |
| EI24         | 0.0003 |
| RHBDF1       | 0.0003 |
| PRR13        | 0.0003 |
| EPHA1        | 0.0003 |
| SWAP70       | 0.0003 |
| SBNO2        | 0.0003 |
| C17orf75     | 0.0003 |
| ETV7         | 0.0003 |
| MFSD11       | 0.0003 |
| AQP10        | 0.0003 |
| NAP1L5       | 0.0003 |
| NKX3-1       | 0.0003 |
| GTPBP10      | 0.0003 |
| ACADVL       | 0.0003 |
| NR5A2        | 0.0003 |
| VSIG4        | 0.0003 |
| SLC7A14      | 0.0003 |
| SIX2         | 0.0003 |
| RPS13        | 0.0003 |
| OR2W1        | 0.0003 |
| GDA          | 0.0003 |
| LANCL1       | 0.0003 |
| CEACAM21     | 0.0003 |
| ALDH6A1      | 0.0003 |
| HIST1H2BJ    | 0.0003 |
| C9orf80      | 0.0003 |
| PCOLCE2      | 0.0003 |
| PRKX         | 0.0003 |
| FAM200B      | 0.0003 |
| ASB8         | 0.0003 |
| C17orf87     | 0.0003 |
| GFOD1        | 0.0003 |
| MAGEC2       | 0.0003 |
| CES2         | 0.0003 |
| HLA-DRB4     | 0.0003 |
| SPRY2        | 0.0003 |

|           |        |
|-----------|--------|
| NFIC      | 0.0003 |
| CD68      | 0.0003 |
| ZNHIT6    | 0.0003 |
| NPFFR2    | 0.0003 |
| GRIN3B    | 0.0003 |
| NGB       | 0.0003 |
| GLI4      | 0.0003 |
| GNAI2     | 0.0003 |
| URM1      | 0.0003 |
| HOXB8     | 0.0003 |
| NRN1      | 0.0003 |
| RAD17     | 0.0003 |
| CD163     | 0.0003 |
| DHRS13    | 0.0003 |
| SMARCD1   | 0.0003 |
| HSPA6     | 0.0003 |
| ACOX1     | 0.0003 |
| PEX7      | 0.0003 |
| HJURP     | 0.0003 |
| KLRF1     | 0.0003 |
| ALPI      | 0.0003 |
| CTGF      | 0.0003 |
| PAK6      | 0.0003 |
| VIM       | 0.0003 |
| PKD2L1    | 0.0003 |
| RCBTB2    | 0.0003 |
| FAM110C   | 0.0003 |
| FHIT      | 0.0003 |
| BMP4      | 0.0003 |
| FOXI3     | 0.0003 |
| GSTO2     | 0.0003 |
| SPECC1L   | 0.0003 |
| DUSP21    | 0.0003 |
| WDR61     | 0.0003 |
| TEKT4P2   | 0.0003 |
| HIST1H2BG | 0.0003 |
| CDKL2     | 0.0003 |
| NXF1      | 0.0003 |
| MCART2    | 0.0003 |
| DNASE1    | 0.0003 |
| DMD       | 0.0003 |
| FBXO2     | 0.0003 |
| TMEM65    | 0.0003 |
| KCNJ15    | 0.0003 |
| ARMCX6    | 0.0003 |
| AATK      | 0.0003 |

|              |        |
|--------------|--------|
| C7orf50      | 0.0003 |
| JAK1         | 0.0003 |
| BTN3A3       | 0.0003 |
| ISOC1        | 0.0003 |
| ABI3         | 0.0003 |
| SH2B1        | 0.0003 |
| GCM2         | 0.0003 |
| NRXN3        | 0.0003 |
| ANKMY1       | 0.0003 |
| FLJ22184     | 0.0003 |
| RUNX1        | 0.0003 |
| TMEM5        | 0.0003 |
| C10orf96     | 0.0003 |
| LMAN1L       | 0.0003 |
| ARHGAP35     | 0.0003 |
| TATDN1       | 0.0003 |
| ABCD2        | 0.0003 |
| OR1L3        | 0.0003 |
| LOC150622    | 0.0003 |
| MFN2         | 0.0003 |
| LOC100652818 | 0.0003 |
| KLHL18       | 0.0003 |
| ANGPT1       | 0.0003 |
| MELK         | 0.0003 |
| C2orf89      | 0.0003 |
| MON2         | 0.0003 |
| ARHGEF1      | 0.0003 |
| CEBPE        | 0.0003 |
| ATP5B        | 0.0003 |
| NENF         | 0.0003 |
| CLCN4        | 0.0003 |
| PFKFB1       | 0.0003 |
| TMEM35       | 0.0003 |
| LOC729680    | 0.0003 |
| SHBG         | 0.0003 |
| SMAD7        | 0.0003 |
| LSM3         | 0.0003 |
| SETD6        | 0.0003 |
| ZG16         | 0.0003 |
| RAB11FIP5    | 0.0003 |
| COX6C        | 0.0003 |
| LYRM7        | 0.0003 |
| OR52K3P      | 0.0003 |
| DUSP23       | 0.0003 |
| PAICS        | 0.0003 |
| C10orf136    | 0.0003 |

|              |        |
|--------------|--------|
| LOX          | 0.0003 |
| MYH6         | 0.0003 |
| AKAP12       | 0.0003 |
| TCEAL1       | 0.0003 |
| INSRR        | 0.0003 |
| ZFC3H1       | 0.0003 |
| FLJ13224     | 0.0003 |
| THRAP3       | 0.0003 |
| MED29        | 0.0003 |
| GDPD5        | 0.0003 |
| OR6Y1        | 0.0003 |
| ZNF473       | 0.0003 |
| NAGLU        | 0.0003 |
| NR0B2        | 0.0003 |
| LOC100271840 | 0.0003 |
| EPHA6        | 0.0003 |
| PCYOX1L      | 0.0003 |
| RPS25        | 0.0003 |
| TBC1D17      | 0.0003 |
| LOC100506710 | 0.0003 |
| MRPS27       | 0.0003 |
| OLFM1        | 0.0003 |
| USP32P1      | 0.0003 |
| RPL17        | 0.0003 |
| SPTY2D1      | 0.0003 |
| LOC100653245 | 0.0003 |
| IL10         | 0.0003 |
| KRT20        | 0.0003 |
| FBXO7        | 0.0003 |
| GNRHR2       | 0.0003 |
| TMEM222      | 0.0003 |
| CCDC7        | 0.0003 |
| RNF39        | 0.0003 |
| ADCYAP1      | 0.0003 |
| ADAMTS14     | 0.0003 |
| TSSK6        | 0.0003 |
| HIGD1B       | 0.0003 |
| EXOC1        | 0.0003 |
| NKTR         | 0.0003 |
| SLC1A1       | 0.0003 |
| LOC100653058 | 0.0003 |
| PPP3R2       | 0.0003 |
| ADAMTSL4     | 0.0003 |
| HIST1H2BN    | 0.0003 |
| SARS2        | 0.0003 |
| NPTXR        | 0.0003 |

|              |        |
|--------------|--------|
| ATIC         | 0.0003 |
| CTR9         | 0.0003 |
| ADHFE1       | 0.0003 |
| STX12        | 0.0003 |
| CST9         | 0.0003 |
| CHRM3        | 0.0003 |
| ZNF407       | 0.0003 |
| UGCG         | 0.0003 |
| GPR137C      | 0.0003 |
| CMTM6        | 0.0003 |
| LOC100506130 | 0.0003 |
| BIRC6        | 0.0003 |
| C19orf12     | 0.0003 |
| TK1          | 0.0003 |
| MST1R        | 0.0003 |
| LOC100507317 | 0.0003 |
| ATG13        | 0.0003 |
| KLHDC8A      | 0.0003 |
| FP588        | 0.0003 |
| C19orf24     | 0.0003 |
| NCOA1        | 0.0003 |
| GAST         | 0.0003 |
| FBXL2        | 0.0003 |
| CDC42SE2     | 0.0003 |
| PPARA        | 0.0003 |
| ECHDC2       | 0.0003 |
| OSBP         | 0.0003 |
| ITGAD        | 0.0003 |
| IRX5         | 0.0003 |
| PSMA2        | 0.0003 |
| SLC25A28     | 0.0003 |
| EIF4E2       | 0.0003 |
| FMO9P        | 0.0003 |
| ATP8B4       | 0.0003 |
| RNFT1        | 0.0003 |
| LOC286467    | 0.0003 |
| SCRT1        | 0.0003 |
| 8-Mar        | 0.0003 |
| GUCA2A       | 0.0003 |
| ZNF197       | 0.0003 |
| SAP130       | 0.0003 |
| HSBP1        | 0.0003 |
| SLC12A8      | 0.0003 |
| GRAMD1B      | 0.0003 |
| PPCS         | 0.0003 |
| FLJ40536     | 0.0003 |



|              |        |
|--------------|--------|
| SLITRK1      | 0.0003 |
| FAM178B      | 0.0003 |
| FLJ39653     | 0.0003 |
| LOC648740    | 0.0003 |
| DAAM1        | 0.0003 |
| RIOK1        | 0.0003 |
| HTR3C        | 0.0003 |
| LEMD2        | 0.0003 |
| BARHL1       | 0.0003 |
| SELRC1       | 0.0003 |
| C6orf225     | 0.0003 |
| NLRP14       | 0.0003 |
| DOLK         | 0.0003 |
| FCGR2B       | 0.0003 |
| LIFR         | 0.0003 |
| C14orf49     | 0.0003 |
| CAPNS1       | 0.0003 |
| USP15        | 0.0003 |
| TMEM45A      | 0.0003 |
| RASL12       | 0.0003 |
| IRF5         | 0.0003 |
| RALGPS1      | 0.0003 |
| PARD3        | 0.0003 |
| CYB5R3       | 0.0003 |
| PISD         | 0.0003 |
| OAZ2         | 0.0003 |
| PAX3         | 0.0003 |
| APBA1        | 0.0003 |
| GDF7         | 0.0003 |
| PFKM         | 0.0003 |
| IFT80        | 0.0003 |
| PPP1R1A      | 0.0003 |
| DAPK1        | 0.0003 |
| DEFB114      | 0.0003 |
| LOC100507508 | 0.0003 |
| TRIB1        | 0.0003 |
| PLA2G15      | 0.0003 |
| RPS24        | 0.0003 |
| HSBP1L1      | 0.0003 |
| RNF10        | 0.0003 |
| GUK1         | 0.0003 |
| PKD2         | 0.0003 |
| OR51B5       | 0.0003 |
| C2orf42      | 0.0003 |
| KIAA1279     | 0.0003 |
| TFDP2        | 0.0003 |

|           |        |
|-----------|--------|
| NKX2-8    | 0.0003 |
| EPHB3     | 0.0003 |
| KCNT1     | 0.0003 |
| CCDC42    | 0.0003 |
| CD109     | 0.0003 |
| SCGB1D1   | 0.0003 |
| PAPSS1    | 0.0003 |
| ANKMY2    | 0.0003 |
| IGSF22    | 0.0003 |
| SPIC      | 0.0003 |
| HIST1H2BB | 0.0003 |
| OASL      | 0.0003 |
| KCTD9     | 0.0003 |
| PREX2     | 0.0003 |
| TMEM62    | 0.0003 |
| DPCR1     | 0.0003 |
| OSM       | 0.0003 |
| TTC26     | 0.0003 |
| FLJ32955  | 0.0003 |
| PEBP4     | 0.0003 |
| ABR       | 0.0003 |
| SYT14L    | 0.0003 |
| PRPF40A   | 0.0003 |
| LRRC70    | 0.0003 |
| TRIO      | 0.0003 |
| HSF5      | 0.0003 |
| CRP       | 0.0003 |
| HDDC2     | 0.0003 |
| ZNF85     | 0.0003 |
| SOS1      | 0.0003 |
| TRRAP     | 0.0003 |
| TREM2     | 0.0003 |
| AP1G1     | 0.0003 |
| WASH2P    | 0.0003 |
| MARVELD3  | 0.0003 |
| MAP3K6    | 0.0003 |
| ESRP1     | 0.0003 |
| SPRR4     | 0.0003 |
| KLHL3     | 0.0003 |
| EPC2      | 0.0003 |
| CD244     | 0.0003 |
| INTS8     | 0.0003 |
| IRX6      | 0.0003 |
| CLDN8     | 0.0003 |
| RAB6B     | 0.0003 |
| AP1M2     | 0.0003 |

|           |        |
|-----------|--------|
| PPIAL4A   | 0.0003 |
| HNRNPH1   | 0.0003 |
| RANBP17   | 0.0003 |
| TSC22D2   | 0.0003 |
| LOC729164 | 0.0003 |
| MTMR14    | 0.0003 |
| NEK6      | 0.0003 |
| KIAA1161  | 0.0003 |
| IGFBP3    | 0.0003 |
| ITPKB     | 0.0003 |
| PCP4L1    | 0.0003 |
| MARK3     | 0.0003 |
| BCL10     | 0.0003 |
| TGOLN2    | 0.0003 |
| CCDC138   | 0.0003 |
| ZNF467    | 0.0003 |
| MYO1B     | 0.0003 |
| EDA2R     | 0.0003 |
| C16orf57  | 0.0003 |
| ZNF740    | 0.0003 |
| KIAA2013  | 0.0003 |
| ACSM1     | 0.0003 |
| MUTED     | 0.0003 |
| COPS2     | 0.0003 |
| ZSWIM3    | 0.0003 |
| PRR24     | 0.0003 |
| THAP7-AS1 | 0.0003 |
| CHMP5     | 0.0003 |
| CNR2      | 0.0003 |
| PSMA5     | 0.0003 |
| AGR3      | 0.0003 |
| LOC255480 | 0.0003 |
| PRPF8     | 0.0003 |
| LNPEP     | 0.0003 |
| CHP       | 0.0003 |
| LOC150568 | 0.0003 |
| GYS1      | 0.0003 |
| UBAC1     | 0.0003 |
| PTPN7     | 0.0003 |
| TIMM8B    | 0.0003 |
| EIF3F     | 0.0003 |
| PRUNE2    | 0.0003 |
| C20orf79  | 0.0003 |
| SDR9C7    | 0.0003 |
| ZDBF2     | 0.0003 |
| MOG       | 0.0003 |

|               |        |
|---------------|--------|
| C17orf51      | 0.0003 |
| INMT          | 0.0003 |
| PC            | 0.0003 |
| VPS11         | 0.0003 |
| LOC100131581  | 0.0003 |
| C14orf177     | 0.0003 |
| CETN2         | 0.0003 |
| NSF           | 0.0003 |
| FAM13B        | 0.0003 |
| DKFZP586I1420 | 0.0003 |
| MSC           | 0.0003 |
| ZNF74         | 0.0003 |
| LOC728392     | 0.0003 |
| RNF123        | 0.0003 |
| ZNF429        | 0.0003 |
| RUVBL1        | 0.0003 |
| MAGOH         | 0.0003 |
| GAL3ST2       | 0.0003 |
| DOPEY1        | 0.0003 |
| HIPK4         | 0.0003 |
| FRRS1         | 0.0003 |
| NEURL2        | 0.0003 |
| STX11         | 0.0003 |
| VPS36         | 0.0003 |
| POFUT2        | 0.0003 |
| PRNT          | 0.0003 |
| AFAP1         | 0.0003 |
| TFAP4         | 0.0003 |
| RAPGEF1       | 0.0003 |
| ZMPSTE24      | 0.0003 |
| LTBR          | 0.0003 |
| LOC100132319  | 0.0003 |
| C6orf203      | 0.0003 |
| NME3          | 0.0003 |
| RHBDL1        | 0.0003 |
| ZNF333        | 0.0003 |
| NRP1          | 0.0003 |
| MBOAT4        | 0.0003 |
| POU3F2        | 0.0003 |
| NAT14         | 0.0003 |
| GPRC6A        | 0.0003 |
| DPP6          | 0.0003 |
| REG1A         | 0.0003 |
| PRDX6         | 0.0003 |
| KCNB2         | 0.0003 |
| PPM1L         | 0.0003 |

|              |        |
|--------------|--------|
| ADAM12       | 0.0003 |
| CACNA1I      | 0.0003 |
| WBP11        | 0.0003 |
| GABARAPL3    | 0.0003 |
| LOC727820    | 0.0003 |
| NEGR1        | 0.0003 |
| CHD1         | 0.0003 |
| LOC100130700 | 0.0003 |
| FAM201A      | 0.0003 |
| C9orf93      | 0.0003 |
| LOC100506034 | 0.0003 |
| CLEC18B      | 0.0003 |
| NAA11        | 0.0003 |
| KDM6B        | 0.0003 |
| RELT         | 0.0003 |
| FGFR2        | 0.0003 |
| TSEN15       | 0.0003 |
| CXorf69      | 0.0003 |
| ZFAND4       | 0.0003 |
| LBX1         | 0.0003 |
| CCNA2        | 0.0003 |
| GNRH1        | 0.0003 |
| RASA4P       | 0.0003 |
| MAP1B        | 0.0003 |
| TRPV4        | 0.0003 |
| PPIA         | 0.0003 |
| CACHD1       | 0.0003 |
| SLC2A10      | 0.0003 |
| NPAS1        | 0.0003 |
| A2M          | 0.0003 |
| CGGBP1       | 0.0003 |
| TMEM167A     | 0.0003 |
| ZNF75A       | 0.0003 |
| LOC100506898 | 0.0003 |
| EXTL2        | 0.0003 |
| MMP7         | 0.0003 |
| CCDC54       | 0.0003 |
| ZNF630       | 0.0003 |
| OTUD6A       | 0.0003 |
| DPEP3        | 0.0003 |
| FAU          | 0.0003 |
| LOC645321    | 0.0003 |
| FOXM1        | 0.0003 |
| RXFP4        | 0.0003 |
| SLC16A2      | 0.0003 |
| ELAVL3       | 0.0003 |

|            |        |
|------------|--------|
| IER2       | 0.0003 |
| ZNF558     | 0.0003 |
| TWIST1     | 0.0003 |
| POLD3      | 0.0003 |
| PTGER3     | 0.0003 |
| CXCL16     | 0.0003 |
| KLC1       | 0.0003 |
| CCR7       | 0.0003 |
| LINC00302  | 0.0003 |
| RBX1       | 0.0003 |
| NCK2       | 0.0003 |
| AFAP1-AS1  | 0.0003 |
| PFDN6      | 0.0003 |
| DR1        | 0.0003 |
| S1PR4      | 0.0003 |
| DDIT3      | 0.0003 |
| CXCR5      | 0.0003 |
| TRPV5      | 0.0003 |
| UQCR10     | 0.0003 |
| PFN1P2     | 0.0003 |
| FBF1       | 0.0003 |
| ZMYM5      | 0.0003 |
| JAM3       | 0.0003 |
| F2R        | 0.0003 |
| ANKRD20A9P | 0.0003 |
| GARNL3     | 0.0003 |
| ANO2       | 0.0003 |
| CEP350     | 0.0003 |
| BCL2L13    | 0.0003 |
| RHEB       | 0.0003 |
| NETO2      | 0.0003 |
| G6PD       | 0.0003 |
| PPP1R13B   | 0.0003 |
| TTC8       | 0.0003 |
| MS4A15     | 0.0003 |
| LCP1       | 0.0003 |
| TXNL4A     | 0.0003 |
| PARP12     | 0.0003 |
| TMEM85     | 0.0003 |
| TNFSF11    | 0.0003 |
| B3GNT4     | 0.0003 |
| XKR4       | 0.0003 |
| SHC3       | 0.0003 |
| FHOD1      | 0.0003 |
| MAGEA5     | 0.0003 |
| CAPRIN2    | 0.0003 |

|           |        |
|-----------|--------|
| DPY19L2P2 | 0.0003 |
| NDUFA4    | 0.0003 |
| ZNF646    | 0.0003 |
| VGLL1     | 0.0003 |
| C8orf75   | 0.0003 |
| NDUFB9    | 0.0003 |
| FNDC4     | 0.0003 |
| ACSBG1    | 0.0003 |
| CD2       | 0.0003 |
| TPTE2P3   | 0.0003 |
| PP12719   | 0.0003 |
| C6orf164  | 0.0003 |
| KIF3C     | 0.0003 |
| TRO       | 0.0003 |
| ZNF480    | 0.0003 |
| MUCL1     | 0.0003 |
| LCE1E     | 0.0003 |
| TIMD4     | 0.0003 |
| C1D       | 0.0003 |
| BTRC      | 0.0003 |
| ATP1A1    | 0.0003 |
| SSR2      | 0.0003 |
| GKN2      | 0.0003 |
| CSTF1     | 0.0003 |
| TRAPPC4   | 0.0003 |
| C5orf64   | 0.0003 |
| KCNA3     | 0.0003 |
| MC5R      | 0.0003 |
| ECE1      | 0.0003 |
| OGFOD2    | 0.0003 |
| RNF170    | 0.0003 |
| LCE2C     | 0.0003 |
| TADA2A    | 0.0003 |
| ORM1      | 0.0003 |
| CCL3L3    | 0.0003 |
| G6PC      | 0.0003 |
| NXN       | 0.0003 |
| LSM2      | 0.0003 |
| MVK       | 0.0003 |
| LEPREL2   | 0.0003 |
| ARL6IP1   | 0.0003 |
| GK        | 0.0003 |
| ICAM3     | 0.0003 |
| NYNRIN    | 0.0003 |
| PQLC3     | 0.0003 |
| UCHL1     | 0.0003 |

|              |        |
|--------------|--------|
| DCTN2        | 0.0003 |
| ACOT13       | 0.0003 |
| ANKRD62      | 0.0003 |
| MIB2         | 0.0003 |
| FOXD3        | 0.0003 |
| MAPT         | 0.0003 |
| SFPQ         | 0.0003 |
| C20orf132    | 0.0003 |
| GOLGA2P2Y    | 0.0003 |
| XIRP2        | 0.0003 |
| CCDC94       | 0.0003 |
| LOC100505683 | 0.0003 |
| C2orf19      | 0.0003 |
| SLC35E2      | 0.0003 |
| OR2L13       | 0.0003 |
| CCDC88A      | 0.0003 |
| DENR         | 0.0003 |
| BLCAP        | 0.0003 |
| CAPN9        | 0.0003 |
| ATG4D        | 0.0003 |
| HS3ST5       | 0.0003 |
| PLB1         | 0.0003 |
| SPANXN3      | 0.0003 |
| ENTPD7       | 0.0003 |
| JUND         | 0.0003 |
| LOC145757    | 0.0003 |
| BTBD6        | 0.0003 |
| INO80        | 0.0003 |
| ERCC1        | 0.0003 |
| NGEF         | 0.0003 |
| BCAM         | 0.0003 |
| ARID1A       | 0.0003 |
| UPP1         | 0.0003 |
| GPR132       | 0.0003 |
| PLA2G12A     | 0.0003 |
| ARHGAP17     | 0.0003 |
| MGC16142     | 0.0003 |
| SLC25A27     | 0.0003 |
| GAS2L2       | 0.0003 |
| CHI3L2       | 0.0003 |
| VGLL2        | 0.0003 |
| CYP2C9       | 0.0003 |
| AP3B2        | 0.0003 |
| ZNF273       | 0.0003 |
| EYS          | 0.0003 |
| KIAA0556     | 0.0003 |



|              |        |
|--------------|--------|
| NPR3         | 0.0003 |
| NODAL        | 0.0003 |
| NAG20        | 0.0003 |
| MBD6         | 0.0003 |
| RFK          | 0.0003 |
| FAM169A      | 0.0003 |
| LILRA2       | 0.0003 |
| S100A7       | 0.0003 |
| USP24        | 0.0003 |
| GLTSCR1      | 0.0003 |
| RPL36        | 0.0003 |
| DCAF6        | 0.0003 |
| LOC100268168 | 0.0003 |
| AMBN         | 0.0003 |
| ZFPL1        | 0.0003 |
| VAR5         | 0.0003 |
| PPP2R5C      | 0.0003 |
| FAM190A      | 0.0003 |
| TOP1MT       | 0.0003 |
| HOXC12       | 0.0003 |
| ANG          | 0.0003 |
| ARID5A       | 0.0003 |
| FOXN3        | 0.0003 |
| ZNF461       | 0.0003 |
| FBXO10       | 0.0003 |
| CNN2         | 0.0003 |
| FTSJD2       | 0.0003 |
| GAD2         | 0.0003 |
| LARGE        | 0.0003 |
| SERPINB9     | 0.0003 |
| CHI3L1       | 0.0003 |
| KCNA2        | 0.0003 |
| HEATR3       | 0.0003 |
| C16orf46     | 0.0003 |
| TGDS         | 0.0003 |
| LOC100505746 | 0.0003 |
| PATZ1        | 0.0003 |
| REEP2        | 0.0003 |
| KRT4         | 0.0003 |
| LINC00266-1  | 0.0003 |
| TREM1        | 0.0003 |
| TECTA        | 0.0003 |
| RASGRF2      | 0.0003 |
| HES1         | 0.0003 |
| HNRNPH2      | 0.0003 |
| SEZ6L        | 0.0003 |

|              |        |
|--------------|--------|
| EMILIN2      | 0.0003 |
| NRIP1        | 0.0003 |
| SNW1         | 0.0003 |
| GABRG2       | 0.0003 |
| RAD1         | 0.0003 |
| RPS20        | 0.0003 |
| RPL24        | 0.0003 |
| TMLHE        | 0.0003 |
| SLC22A31     | 0.0003 |
| LOC441124    | 0.0003 |
| HOMER1       | 0.0003 |
| CALHM3       | 0.0003 |
| NGFRAP1      | 0.0003 |
| TMEM9        | 0.0003 |
| HEBP1        | 0.0003 |
| VMAC         | 0.0003 |
| NAPG         | 0.0003 |
| HIST1H2AB    | 0.0003 |
| WRN          | 0.0003 |
| CADM4        | 0.0003 |
| C3orf71      | 0.0003 |
| HOXB1        | 0.0003 |
| SLCO1B3      | 0.0003 |
| GAGE1        | 0.0003 |
| ZNF577       | 0.0003 |
| SLC6A9       | 0.0003 |
| DECR1        | 0.0003 |
| HIST1H2BK    | 0.0003 |
| RPS19BP1     | 0.0003 |
| THEG         | 0.0003 |
| MATN4        | 0.0003 |
| FAM120B      | 0.0003 |
| RYBP         | 0.0003 |
| GLIS3-AS1    | 0.0003 |
| KRT19        | 0.0003 |
| LILRB1       | 0.0003 |
| GPAM         | 0.0003 |
| GRIP1        | 0.0003 |
| C20orf203    | 0.0003 |
| LOC100130713 | 0.0003 |
| RNF114       | 0.0003 |
| TCF7L2       | 0.0003 |
| RC3H1        | 0.0003 |
| WDR69        | 0.0003 |
| FAM115C      | 0.0003 |
| RPL7L1       | 0.0003 |

|              |        |
|--------------|--------|
| RUNX1T1      | 0.0003 |
| MTIF3        | 0.0003 |
| AMPD1        | 0.0003 |
| KRTAP13-1    | 0.0003 |
| DNAI2        | 0.0003 |
| LOC389634    | 0.0003 |
| SLC35D2      | 0.0003 |
| CACNG5       | 0.0003 |
| RNF135       | 0.0003 |
| PSG9         | 0.0003 |
| LOC401588    | 0.0003 |
| LOC732275    | 0.0003 |
| LOC100128343 | 0.0003 |
| PDCD4        | 0.0003 |
| DENND2A      | 0.0003 |
| ALDH2        | 0.0003 |
| GALR3        | 0.0003 |
| ZNF385D      | 0.0003 |
| ACE          | 0.0003 |
| CASS4        | 0.0003 |
| FAM63B       | 0.0003 |
| CACNA1S      | 0.0003 |
| MYO3A        | 0.0003 |
| IFNA16       | 0.0003 |
| MYBL2        | 0.0003 |
| SMYD5        | 0.0003 |
| STIL         | 0.0003 |
| LOC338579    | 0.0003 |
| ABHD12B      | 0.0003 |
| EYA2         | 0.0003 |
| MOS          | 0.0003 |
| CHRNE        | 0.0003 |
| KCTD18       | 0.0003 |
| PTPRG        | 0.0003 |
| CLEC1B       | 0.0003 |
| PDPR         | 0.0003 |
| SPG21        | 0.0003 |
| KLF17        | 0.0003 |
| ARPC3        | 0.0003 |
| ENPP1        | 0.0003 |
| EIF4G3       | 0.0003 |
| FLJ36644     | 0.0003 |
| LRRC25       | 0.0003 |
| ASMTL        | 0.0003 |
| RUNDC2C      | 0.0003 |
| CPXM2        | 0.0003 |

|              |        |
|--------------|--------|
| CDH1         | 0.0003 |
| IL3RA        | 0.0003 |
| OTOP1        | 0.0003 |
| BRIP1        | 0.0003 |
| WRAP53       | 0.0003 |
| MTNR1A       | 0.0003 |
| CIB4         | 0.0003 |
| PRSS50       | 0.0003 |
| LOC100507619 | 0.0003 |
| DSC3         | 0.0003 |
| RBFOX1       | 0.0003 |
| BRI3         | 0.0003 |
| METTL17      | 0.0003 |
| LIM2         | 0.0003 |
| CITED1       | 0.0003 |
| TIAL1        | 0.0003 |
| FAM189A2     | 0.0003 |
| CFL1         | 0.0003 |
| REST         | 0.0003 |
| FHAD1        | 0.0003 |
| ALOX5        | 0.0003 |
| CITED2       | 0.0003 |
| CCDC47       | 0.0003 |
| POM121L4P    | 0.0003 |
| EPDR1        | 0.0003 |
| B4GALT7      | 0.0003 |
| CCT3         | 0.0003 |
| FBXW7        | 0.0003 |
| ALDH1L2      | 0.0003 |
| FNIP2        | 0.0003 |
| NEFM         | 0.0003 |
| FAM24A       | 0.0003 |
| LOC646627    | 0.0003 |
| LGI3         | 0.0003 |
| VPS13C       | 0.0003 |
| SPIN2B       | 0.0003 |
| PAX1         | 0.0003 |
| CREB1        | 0.0003 |
| IQCK         | 0.0003 |
| MYO9B        | 0.0003 |
| SLC6A17      | 0.0003 |
| SOX7         | 0.0003 |
| DPEP2        | 0.0003 |
| LOC407835    | 0.0003 |
| ARHGEF7      | 0.0003 |
| PPP1R2       | 0.0003 |

|              |        |
|--------------|--------|
| ZNF674       | 0.0003 |
| C2orf3       | 0.0003 |
| TNFAIP8L1    | 0.0003 |
| MRPL21       | 0.0003 |
| SLC7A1       | 0.0003 |
| SORL1        | 0.0003 |
| CYFIP1       | 0.0003 |
| ECRP         | 0.0003 |
| POU3F4       | 0.0003 |
| LOC100131496 | 0.0003 |
| ME2          | 0.0003 |
| GFI1         | 0.0003 |
| TAS2R16      | 0.0003 |
| DRG2         | 0.0003 |
| LOC729121    | 0.0003 |
| KRT6C        | 0.0003 |
| CNST         | 0.0003 |
| TCL6         | 0.0003 |
| RRAS         | 0.0003 |
| SMG7         | 0.0003 |
| SLC1A4       | 0.0003 |
| SRCIN1       | 0.0003 |
| ZNF621       | 0.0003 |
| CSNK1D       | 0.0003 |
| FGF7         | 0.0003 |
| IL27         | 0.0003 |
| CCNDBP1      | 0.0003 |
| CCND2        | 0.0003 |
| CTNND2       | 0.0003 |
| CDC27        | 0.0003 |
| FGFBP1       | 0.0003 |
| MAPK3        | 0.0003 |
| TMEM126A     | 0.0003 |
| DGCR2        | 0.0003 |
| C22orf43     | 0.0003 |
| RPA4         | 0.0003 |
| MT1B         | 0.0003 |
| NOC4L        | 0.0003 |
| C6orf72      | 0.0003 |
| UROD         | 0.0003 |
| KHDRBS1      | 0.0003 |
| OR2F1        | 0.0003 |
| AGAP7        | 0.0003 |
| LIMS2        | 0.0003 |
| LOC650293    | 0.0003 |
| RFT1         | 0.0003 |

|              |        |
|--------------|--------|
| TMEM133      | 0.0003 |
| ARRDC4       | 0.0003 |
| NPIP         | 0.0003 |
| CAMKMT       | 0.0003 |
| DPM3         | 0.0003 |
| PLGLB1       | 0.0003 |
| CKAP2L       | 0.0003 |
| CPSF3L       | 0.0003 |
| FAM127B      | 0.0003 |
| OMP          | 0.0003 |
| CRX          | 0.0003 |
| FAM74A1      | 0.0003 |
| LOC100507654 | 0.0003 |
| RSL1D1       | 0.0003 |
| L3MBTL2      | 0.0003 |
| CAT          | 0.0003 |
| RPL27A       | 0.0003 |
| BLMH         | 0.0003 |
| FBXO39       | 0.0003 |
| TBCA         | 0.0003 |
| NOS1         | 0.0003 |
| SLC16A9      | 0.0003 |
| SNRPC        | 0.0003 |
| HIAT1        | 0.0003 |
| MRAP         | 0.0003 |
| C19orf46     | 0.0003 |
| MLST8        | 0.0003 |
| IBA57        | 0.0003 |
| TMEM71       | 0.0003 |
| FUT8         | 0.0003 |
| HS2ST1       | 0.0003 |
| POP1         | 0.0003 |
| KCNJ5        | 0.0003 |
| RAP1GAP      | 0.0003 |
| LMBRD1       | 0.0003 |
| MAPRE3       | 0.0003 |
| TRIM33       | 0.0003 |
| ZDHHC6       | 0.0003 |
| LOC100652765 | 0.0003 |
| RPL29        | 0.0003 |
| MGC39545     | 0.0003 |
| ARHGAP29     | 0.0003 |
| PLEKHA7      | 0.0003 |
| TDRG1        | 0.0003 |
| PDGFA        | 0.0003 |
| CD80         | 0.0003 |

|              |        |
|--------------|--------|
| OTOP3        | 0.0003 |
| FAM166B      | 0.0003 |
| GOLGA6L9     | 0.0003 |
| ATP10B       | 0.0003 |
| SQLE         | 0.0003 |
| C3orf24      | 0.0003 |
| ZNF546       | 0.0003 |
| C17orf66     | 0.0003 |
| SLC15A4      | 0.0003 |
| GNB2         | 0.0003 |
| IFNE         | 0.0003 |
| TRPM4        | 0.0003 |
| SMA4         | 0.0003 |
| C1orf49      | 0.0003 |
| PTGER1       | 0.0003 |
| PEPD         | 0.0003 |
| RIMS3        | 0.0003 |
| CDA          | 0.0003 |
| KALRN        | 0.0003 |
| LOC100170939 | 0.0003 |
| DHX8         | 0.0003 |
| SENP3        | 0.0003 |
| AMIGO1       | 0.0003 |
| CXorf56      | 0.0003 |
| PIGW         | 0.0003 |
| HCLS1        | 0.0003 |
| LIMK2        | 0.0003 |
| GP1BA        | 0.0003 |
| HAUS1        | 0.0003 |
| C16orf72     | 0.0003 |
| NEXN         | 0.0003 |
| C10orf28     | 0.0003 |
| C9orf150     | 0.0003 |
| GP9          | 0.0003 |
| C14orf21     | 0.0003 |
| ACSF3        | 0.0003 |
| SLC39A12     | 0.0003 |
| RERG         | 0.0003 |
| PTPN9        | 0.0003 |
| HTR7P1       | 0.0003 |
| SLC22A15     | 0.0003 |
| NADK         | 0.0003 |
| PCDHA5       | 0.0003 |
| ACPP         | 0.0003 |
| HOXD12       | 0.0003 |
| ZFYVE1       | 0.0003 |

|              |        |
|--------------|--------|
| UBTD2        | 0.0003 |
| TRADD        | 0.0003 |
| LOC100132593 | 0.0003 |
| SFMBT2       | 0.0003 |
| GSTCD        | 0.0003 |
| SCEL         | 0.0003 |
| OR52K2       | 0.0003 |
| HEATR6       | 0.0003 |
| FCN1         | 0.0003 |
| ATRNL1       | 0.0003 |
| DKFZP434A062 | 0.0003 |
| ARL4A        | 0.0003 |
| FAM194B      | 0.0003 |
| BRS3         | 0.0003 |
| WDFY4        | 0.0003 |
| RIBC2        | 0.0003 |
| ADAMTS3      | 0.0003 |
| FSIP1        | 0.0003 |
| CDH17        | 0.0003 |
| LYST         | 0.0003 |
| ERVFRD-1     | 0.0003 |
| CDKL3        | 0.0003 |
| TTC38        | 0.0003 |
| C14orf178    | 0.0003 |
| SRSF11       | 0.0003 |
| METRNL       | 0.0003 |
| MAFG         | 0.0003 |
| DMRT2        | 0.0003 |
| HLA-DPB1     | 0.0003 |
| TCTN1        | 0.0003 |
| NFKBIB       | 0.0003 |
| ARFGEF2      | 0.0003 |
| FLJ43826     | 0.0003 |
| ZNF729       | 0.0003 |
| WDR75        | 0.0003 |
| CD8A         | 0.0003 |
| ENOPH1       | 0.0003 |
| ATP13A1      | 0.0003 |
| LOXHD1       | 0.0003 |
| C7orf45      | 0.0003 |
| STIM1        | 0.0003 |
| CRYBB3       | 0.0003 |
| YWHAG        | 0.0003 |
| MORC2-AS1    | 0.0003 |
| NR2C2        | 0.0003 |
| RGS7BP       | 0.0003 |



|              |        |
|--------------|--------|
| ACBD5        | 0.0003 |
| LOC340508    | 0.0003 |
| ZNF208       | 0.0003 |
| SYNPR        | 0.0003 |
| ALCAM        | 0.0003 |
| TBCD         | 0.0003 |
| GJA8         | 0.0003 |
| ROM1         | 0.0003 |
| LOC220729    | 0.0003 |
| KCTD15       | 0.0003 |
| EFHC1        | 0.0003 |
| HERC2P7      | 0.0003 |
| FANCA        | 0.0003 |
| ABHD1        | 0.0003 |
| KLK13        | 0.0003 |
| KRTAP9-8     | 0.0003 |
| HES6         | 0.0003 |
| ETV4         | 0.0003 |
| LOC100289341 | 0.0003 |
| CNTNAP2      | 0.0003 |
| TAS2R39      | 0.0003 |
| RBCK1        | 0.0003 |
| RPS8         | 0.0003 |
| COPS3        | 0.0003 |
| TTC23L       | 0.0003 |
| RSG1         | 0.0003 |
| TSTD1        | 0.0003 |
| KDM6A        | 0.0003 |
| SNX2         | 0.0003 |
| CMTM1        | 0.0003 |
| ZBTB10       | 0.0003 |
| MTMR7        | 0.0003 |
| PHTF1        | 0.0003 |
| INPP4B       | 0.0003 |
| WDR6         | 0.0003 |
| C9orf89      | 0.0003 |
| GSDMA        | 0.0003 |
| OSBPL11      | 0.0003 |
| RBM8A        | 0.0003 |
| APPL1        | 0.0003 |
| ZNF718       | 0.0003 |
| C1orf110     | 0.0003 |
| MTFR1        | 0.0003 |
| RUNX3        | 0.0003 |
| CCNF         | 0.0003 |
| GPBR         | 0.0003 |

|              |        |
|--------------|--------|
| MAGEC1       | 0.0003 |
| USP13        | 0.0003 |
| SERPINA11    | 0.0003 |
| SOCS3        | 0.0003 |
| TSG101       | 0.0003 |
| 15-Sep       | 0.0003 |
| HDAC11       | 0.0003 |
| HCST         | 0.0003 |
| LOC100506348 | 0.0003 |
| LOC113230    | 0.0003 |
| CSRNP2       | 0.0003 |
| LOC100288675 | 0.0003 |
| H2AFB2       | 0.0003 |
| OR8B8        | 0.0003 |
| PALM3        | 0.0003 |
| DMRT3        | 0.0003 |
| KBTBD8       | 0.0003 |
| 3-Mar        | 0.0003 |
| LOC645431    | 0.0003 |
| PTGFR        | 0.0003 |
| ICA1         | 0.0003 |
| UROC1        | 0.0003 |
| TMCC3        | 0.0003 |
| ACAT1        | 0.0003 |
| PDCL3        | 0.0003 |
| ARMC4        | 0.0003 |
| MTX2         | 0.0003 |
| BMPRI1B      | 0.0003 |
| FBXL6        | 0.0003 |
| HPSE         | 0.0003 |
| TCTN3        | 0.0003 |
| CMTM7        | 0.0003 |
| CAMSAP1      | 0.0003 |
| OK/SW-CL.36  | 0.0003 |
| C1QTNF2      | 0.0003 |
| ARSD         | 0.0003 |
| STX1B        | 0.0003 |
| ZADH2        | 0.0003 |
| CD72         | 0.0003 |
| TNFRSF10B    | 0.0003 |
| EXOGE        | 0.0003 |
| CARS2        | 0.0003 |
| MPP3         | 0.0003 |
| UFC1         | 0.0003 |
| COL20A1      | 0.0003 |
| GBP5         | 0.0003 |

|            |        |
|------------|--------|
| MMP25      | 0.0003 |
| P2RX1      | 0.0003 |
| TBC1D10C   | 0.0003 |
| C1R        | 0.0003 |
| LOC253039  | 0.0003 |
| AIG1       | 0.0003 |
| CYR61      | 0.0003 |
| NSUN7      | 0.0003 |
| CLSTN2     | 0.0003 |
| LRFN3      | 0.0003 |
| TAS2R1     | 0.0003 |
| ZNF607     | 0.0003 |
| LGR6       | 0.0003 |
| CEP164     | 0.0003 |
| ZACN       | 0.0003 |
| CRAMP1L    | 0.0003 |
| PDZK1IP1   | 0.0003 |
| PILRB      | 0.0003 |
| LOC541467  | 0.0003 |
| USP30      | 0.0003 |
| IGDCC3     | 0.0003 |
| PPIL6      | 0.0003 |
| LGALSL     | 0.0003 |
| PRELID1    | 0.0003 |
| REN        | 0.0003 |
| PARM1      | 0.0003 |
| ZNF692     | 0.0003 |
| ABCA8      | 0.0003 |
| FAM65B     | 0.0003 |
| PYHIN1     | 0.0003 |
| PSMB7      | 0.0003 |
| DBI        | 0.0003 |
| ANP32A-IT1 | 0.0003 |
| HFE2       | 0.0003 |
| GRIK4      | 0.0003 |
| C7orf74    | 0.0003 |
| KCNG1      | 0.0003 |
| PNLIPRP2   | 0.0003 |
| COX7B      | 0.0003 |
| RPLP0      | 0.0003 |
| MCHR1      | 0.0003 |
| LINC00483  | 0.0003 |
| MFRP       | 0.0003 |
| AEBP2      | 0.0003 |
| SLC22A5    | 0.0003 |
| PIGO       | 0.0003 |

|              |        |
|--------------|--------|
| NET1         | 0.0003 |
| ZSCAN20      | 0.0003 |
| C14orf28     | 0.0003 |
| GRRP1        | 0.0003 |
| LAMTOR2      | 0.0003 |
| LOC780529    | 0.0003 |
| CNGB3        | 0.0003 |
| SNX18        | 0.0003 |
| KEAP1        | 0.0003 |
| RIC8A        | 0.0003 |
| GJA1         | 0.0003 |
| CPSF2        | 0.0003 |
| ZNF33B       | 0.0003 |
| KCTD12       | 0.0003 |
| LOC100506031 | 0.0003 |
| CADPS2       | 0.0003 |
| GPR162       | 0.0003 |
| ZNF711       | 0.0003 |
| MRPL16       | 0.0003 |
| C11orf2      | 0.0003 |
| GTDC1        | 0.0003 |
| CTNNBL1      | 0.0003 |
| CCDC146      | 0.0003 |
| GOLGA8F      | 0.0003 |
| FAM171A1     | 0.0003 |
| MEPCE        | 0.0003 |
| LOC284926    | 0.0003 |
| C11orf63     | 0.0003 |
| CXorf48      | 0.0003 |
| TEF          | 0.0003 |
| PIP5K1B      | 0.0003 |
| CA5BP1       | 0.0003 |
| KCNQ2        | 0.0003 |
| PAK1IP1      | 0.0003 |
| MRP63        | 0.0003 |
| LINC00256A   | 0.0003 |
| C9orf79      | 0.0003 |
| SPAG11B      | 0.0003 |
| SLC4A11      | 0.0003 |
| TMEM146      | 0.0003 |
| PPT2         | 0.0003 |
| C16orf54     | 0.0003 |
| U2AF1L4      | 0.0003 |
| IFT57        | 0.0003 |
| ITIH4        | 0.0003 |
| HMGB3        | 0.0003 |

|              |        |
|--------------|--------|
| CYB5R1       | 0.0003 |
| SORBS2       | 0.0003 |
| PTPRA        | 0.0003 |
| ARHGEF35     | 0.0003 |
| LOC100509968 | 0.0003 |
| CCT8L2       | 0.0003 |
| AURKAIP1     | 0.0003 |
| LRIF1        | 0.0003 |
| C11orf31     | 0.0003 |
| SLC30A8      | 0.0003 |
| HLA-DOB      | 0.0003 |
| C2orf29      | 0.0003 |
| NHP2         | 0.0003 |
| DOCK6        | 0.0003 |
| USP39        | 0.0003 |
| TNFAIP2      | 0.0003 |
| GNA14        | 0.0003 |
| PI4KB        | 0.0003 |
| DKFZP564C196 | 0.0003 |
| EYA3         | 0.0003 |
| C19orf20     | 0.0003 |
| COMMD2       | 0.0003 |
| PMP2         | 0.0003 |
| LOC100499194 | 0.0003 |
| SNCB         | 0.0003 |
| TNFAIP6      | 0.0003 |
| OCM2         | 0.0003 |
| RASL11A      | 0.0003 |
| RAD9A        | 0.0003 |
| AGPAT9       | 0.0003 |
| TBC1D9B      | 0.0003 |
| NEU4         | 0.0003 |
| PPP1R18      | 0.0003 |
| CLINT1       | 0.0003 |
| GGT1         | 0.0003 |
| ANKRD36BP1   | 0.0003 |
| STMN4        | 0.0003 |
| SLU7         | 0.0003 |
| PNMAL2       | 0.0003 |
| CRYBB1       | 0.0003 |
| SIRPB1       | 0.0003 |
| RRP1B        | 0.0003 |
| SCARA5       | 0.0003 |
| DLL3         | 0.0003 |
| POMT2        | 0.0003 |
| ATXN7L1      | 0.0003 |

|              |        |
|--------------|--------|
| BMP3         | 0.0003 |
| C19orf76     | 0.0003 |
| COBLL1       | 0.0003 |
| AARSD1       | 0.0003 |
| MED23        | 0.0003 |
| LOC100130456 | 0.0003 |
| THBD         | 0.0003 |
| GPR124       | 0.0003 |
| FSIP2        | 0.0003 |
| TTL          | 0.0003 |
| MICALCL      | 0.0003 |
| SERP2        | 0.0003 |
| GOLPH3L      | 0.0003 |
| PPP1R3E      | 0.0003 |
| OSTC         | 0.0003 |
| EXOC7        | 0.0003 |
| TTY15        | 0.0003 |
| DBP          | 0.0003 |
| AVPR2        | 0.0003 |
| SPTLC3       | 0.0003 |
| MYL10        | 0.0003 |
| TARBP1       | 0.0003 |
| CATSPER1     | 0.0003 |
| GLB1L2       | 0.0003 |
| ARHGEF15     | 0.0003 |
| NCBP2        | 0.0003 |
| HCG4         | 0.0003 |
| BAG4         | 0.0003 |
| KIAA0195     | 0.0003 |
| RFX4         | 0.0003 |
| ZNRF1        | 0.0003 |
| MRC2         | 0.0003 |
| ACAP2        | 0.0003 |
| GLUD1        | 0.0003 |
| CATSPERG     | 0.0003 |
| RBM4         | 0.0003 |
| SFTA2        | 0.0003 |
| ACSM5        | 0.0003 |
| TPD52L3      | 0.0003 |
| AP4S1        | 0.0003 |
| SEC22B       | 0.0003 |
| ALOX15       | 0.0003 |
| C22orf46     | 0.0003 |
| 10-Sep       | 0.0003 |
| RUSC1        | 0.0003 |
| C6orf162     | 0.0003 |

|           |        |
|-----------|--------|
| ITGB3     | 0.0003 |
| ZIK1      | 0.0003 |
| TTL5      | 0.0003 |
| PTCH2     | 0.0003 |
| CHRNA2    | 0.0003 |
| STC2      | 0.0003 |
| DSCR9     | 0.0003 |
| TMEM54    | 0.0003 |
| TSPAN7    | 0.0003 |
| POU2F1    | 0.0003 |
| GPSM3     | 0.0003 |
| LRRC59    | 0.0003 |
| TNFAIP1   | 0.0003 |
| COG7      | 0.0003 |
| P2RY6     | 0.0003 |
| TM4SF19   | 0.0003 |
| CCDC41    | 0.0003 |
| TFEB      | 0.0003 |
| TAOK1     | 0.0003 |
| XK        | 0.0003 |
| FBXW11    | 0.0003 |
| RAB6A     | 0.0003 |
| C20orf96  | 0.0003 |
| PIM3      | 0.0003 |
| OXSRI     | 0.0003 |
| CALU      | 0.0003 |
| RNF145    | 0.0003 |
| SFT2D2    | 0.0003 |
| TREML2    | 0.0003 |
| ZBP1      | 0.0003 |
| ZNF876P   | 0.0003 |
| TRAFD1    | 0.0003 |
| E2F2      | 0.0003 |
| C17orf61  | 0.0003 |
| MEG3      | 0.0003 |
| MIER3     | 0.0003 |
| ZNF311    | 0.0003 |
| RASA2     | 0.0003 |
| FIBP      | 0.0003 |
| FITM2     | 0.0003 |
| PITPNM1   | 0.0003 |
| C9orf117  | 0.0003 |
| C9orf66   | 0.0003 |
| NPTX2     | 0.0003 |
| LOC645212 | 0.0003 |
| DCP1A     | 0.0003 |

|              |        |
|--------------|--------|
| RPL7         | 0.0003 |
| VSTM2L       | 0.0003 |
| C20orf85     | 0.0003 |
| PRKAA2       | 0.0003 |
| LOC100132014 | 0.0003 |
| GPM6A        | 0.0003 |
| LOC100132815 | 0.0003 |
| ZNF503       | 0.0003 |
| SECISBP2     | 0.0003 |
| FLJ30064     | 0.0003 |
| C5orf41      | 0.0003 |
| CCT5         | 0.0003 |
| HSH2D        | 0.0003 |
| FAM69C       | 0.0003 |
| LOC100009676 | 0.0003 |
| PXT1         | 0.0003 |
| GTF2IRD1     | 0.0003 |
| SPINK5       | 0.0003 |
| TMEM186      | 0.0003 |
| GC           | 0.0003 |
| DNM3         | 0.0003 |
| WDR81        | 0.0003 |
| ZNF507       | 0.0003 |
| PSMD1        | 0.0003 |
| GPR111       | 0.0003 |
| IDH3B        | 0.0003 |
| SDHB         | 0.0003 |
| GSG2         | 0.0003 |
| DKFZp547J222 | 0.0003 |
| DNAJC24      | 0.0003 |
| CETP         | 0.0003 |
| EPHA10       | 0.0003 |
| UTY          | 0.0003 |
| LOC572558    | 0.0003 |
| AIMP1        | 0.0003 |
| ANGPT2       | 0.0003 |
| TMEFF1       | 0.0003 |
| TPX2         | 0.0003 |
| TNC          | 0.0003 |
| HADH         | 0.0003 |
| OGDH         | 0.0003 |
| SPCS2        | 0.0003 |
| ZNF606       | 0.0003 |
| MASP2        | 0.0003 |
| YIPF2        | 0.0003 |
| TDGF1        | 0.0003 |



|           |        |
|-----------|--------|
| C20orf160 | 0.0003 |
| RIMKLB    | 0.0003 |
| KIAA0528  | 0.0003 |
| SPATS2    | 0.0003 |
| BST2      | 0.0003 |
| NHLH2     | 0.0003 |
| NAIP      | 0.0003 |
| TRIM45    | 0.0003 |
| TREH      | 0.0003 |
| PITRM1    | 0.0003 |
| DEPTOR    | 0.0003 |
| DPY19L2   | 0.0003 |
| TPPP      | 0.0003 |
| ZMAT2     | 0.0003 |
| GLYATL2   | 0.0003 |
| AHNAK     | 0.0003 |
| CDC123    | 0.0003 |
| LOC257396 | 0.0003 |
| MAP2      | 0.0003 |
| ANKK1     | 0.0003 |
| SPRR2D    | 0.0003 |
| SEC14L4   | 0.0003 |
| C17orf74  | 0.0003 |
| KCNB1     | 0.0003 |
| ZNF16     | 0.0003 |
| LOC389791 | 0.0003 |
| CDK14     | 0.0003 |
| PAN3      | 0.0003 |
| ZNF780B   | 0.0003 |
| SFTPD     | 0.0003 |
| SLC44A3   | 0.0003 |
| KDM5C     | 0.0003 |
| UBXN8     | 0.0003 |
| TTY23     | 0.0003 |
| C2orf50   | 0.0003 |
| PREX1     | 0.0003 |
| NLRC4     | 0.0003 |
| POLB      | 0.0003 |
| TRIP13    | 0.0003 |
| PIGA      | 0.0003 |
| LOC729915 | 0.0003 |
| MSX2P1    | 0.0003 |
| USH2A     | 0.0003 |
| WIF1      | 0.0003 |
| TIMP2     | 0.0003 |
| BAHCC1    | 0.0003 |

|              |        |
|--------------|--------|
| UBR2         | 0.0003 |
| PDXK         | 0.0003 |
| CCDC8        | 0.0003 |
| GNB3         | 0.0003 |
| LOC440461    | 0.0003 |
| CCNO         | 0.0003 |
| KRT5         | 0.0003 |
| TPCN2        | 0.0003 |
| PSMD2        | 0.0003 |
| GALNT11      | 0.0003 |
| NDFIP1       | 0.0003 |
| PHF20L1      | 0.0003 |
| ARVCF        | 0.0003 |
| ALKBH2       | 0.0003 |
| TFEC         | 0.0003 |
| FAM70B       | 0.0003 |
| ECHS1        | 0.0003 |
| CDH7         | 0.0003 |
| EPHA3        | 0.0003 |
| DLG2         | 0.0003 |
| CAB39L       | 0.0003 |
| TMEM174      | 0.0003 |
| RAB40AL      | 0.0003 |
| PPM1F        | 0.0003 |
| C1QTNF7      | 0.0003 |
| AGBL1        | 0.0003 |
| POLD4        | 0.0003 |
| YBX1         | 0.0003 |
| LOC158960    | 0.0003 |
| UBE4A        | 0.0003 |
| PLAGL2       | 0.0003 |
| TRH          | 0.0003 |
| FANK1        | 0.0003 |
| FLJ40453     | 0.0003 |
| RPA1         | 0.0003 |
| C20orf106    | 0.0003 |
| SHFM1        | 0.0003 |
| LOC541473    | 0.0003 |
| SLC22A3      | 0.0003 |
| ANGPTL4      | 0.0003 |
| ARL17B       | 0.0003 |
| MAPK7        | 0.0003 |
| AIRE         | 0.0003 |
| LOC100507140 | 0.0003 |
| PDE4A        | 0.0003 |
| CYFIP2       | 0.0003 |

|              |        |
|--------------|--------|
| ADAMTS16     | 0.0003 |
| CEACAM7      | 0.0003 |
| AMOTL1       | 0.0003 |
| MRPL55       | 0.0003 |
| ZNF879       | 0.0003 |
| TM7SF4       | 0.0003 |
| HN1          | 0.0003 |
| TMEM44       | 0.0003 |
| EGFL6        | 0.0003 |
| LMCD1        | 0.0003 |
| USP25        | 0.0003 |
| ADM          | 0.0003 |
| CYP1B1       | 0.0003 |
| GPLD1        | 0.0003 |
| CNTN2        | 0.0003 |
| RAB7B        | 0.0003 |
| NTNG1        | 0.0003 |
| C1orf85      | 0.0003 |
| RASSF7       | 0.0003 |
| DMRTC1       | 0.0003 |
| R3HDML       | 0.0003 |
| TAS2R45      | 0.0003 |
| FMO3         | 0.0003 |
| SYNM         | 0.0003 |
| UBE2D4       | 0.0003 |
| FASTKD3      | 0.0003 |
| LOC100128176 | 0.0003 |
| CLTCL1       | 0.0003 |
| SLC4A5       | 0.0003 |
| FOXA1        | 0.0003 |
| ZNF624       | 0.0003 |
| TK2          | 0.0003 |
| CYP39A1      | 0.0003 |
| PVRL1        | 0.0003 |
| FLJ37644     | 0.0003 |
| CDH20        | 0.0003 |
| SMN1         | 0.0003 |
| CPA3         | 0.0003 |
| MRPS28       | 0.0003 |
| UBE2DNL      | 0.0003 |
| LOC100507377 | 0.0003 |
| ZNF257       | 0.0003 |
| HR44         | 0.0003 |
| TBC1D10A     | 0.0003 |
| LOC645984    | 0.0003 |
| IL10RB       | 0.0003 |

|           |        |
|-----------|--------|
| GFAP      | 0.0003 |
| CCL2      | 0.0003 |
| ALKBH6    | 0.0003 |
| DUSP10    | 0.0003 |
| LRRC3C    | 0.0003 |
| TUBA1A    | 0.0003 |
| CILP      | 0.0003 |
| ZCCHC18   | 0.0003 |
| UROS      | 0.0003 |
| DOK6      | 0.0003 |
| RSPH6A    | 0.0003 |
| OR8U1     | 0.0003 |
| NAT1      | 0.0003 |
| RNF112    | 0.0003 |
| PLBD1     | 0.0003 |
| FXC1      | 0.0003 |
| NDST1     | 0.0003 |
| MUC15     | 0.0003 |
| C1QC      | 0.0003 |
| SLC9A3R2  | 0.0003 |
| LRRC37A4  | 0.0003 |
| LRSAM1    | 0.0003 |
| OPA1      | 0.0003 |
| NECAB2    | 0.0003 |
| POM121L8P | 0.0003 |
| GPR65     | 0.0003 |
| UBFD1     | 0.0003 |
| BCL7B     | 0.0003 |
| MEF2A     | 0.0003 |
| VPREB3    | 0.0003 |
| CEACAM19  | 0.0003 |
| MEGF8     | 0.0003 |
| REEP5     | 0.0003 |
| FBLN1     | 0.0003 |
| ELOVL5    | 0.0003 |
| RPL27     | 0.0003 |
| PHOX2B    | 0.0003 |
| OLFML3    | 0.0003 |
| COL21A1   | 0.0003 |
| TULP2     | 0.0003 |
| AASDH     | 0.0003 |
| SLC25A35  | 0.0003 |
| FAM171B   | 0.0003 |
| GAS2      | 0.0003 |
| ABCC9     | 0.0003 |
| PSKH2     | 0.0003 |

|           |        |
|-----------|--------|
| SLC25A10  | 0.0003 |
| SMARCA5   | 0.0003 |
| NOL8      | 0.0003 |
| OR2A25    | 0.0003 |
| HRAS      | 0.0003 |
| GPR56     | 0.0003 |
| CCDC84    | 0.0003 |
| FREM1     | 0.0003 |
| SH3PXD2B  | 0.0003 |
| LINC00506 | 0.0003 |
| TOMM34    | 0.0003 |
| SOAT1     | 0.0003 |
| GPR143    | 0.0003 |
| SLC17A7   | 0.0003 |
| NT5C1A    | 0.0003 |
| TMEM50B   | 0.0003 |
| ASAP2     | 0.0003 |
| CST1      | 0.0003 |
| SRM       | 0.0003 |
| HNMT      | 0.0003 |
| BPIFC     | 0.0003 |
| KRBA1     | 0.0003 |
| AHNAK2    | 0.0003 |
| ZNF654    | 0.0003 |
| MDGA1     | 0.0003 |
| POLR3E    | 0.0003 |
| C13orf15  | 0.0003 |
| LOC646903 | 0.0003 |
| ZNF347    | 0.0003 |
| C7orf46   | 0.0003 |
| CYP2B7P1  | 0.0003 |
| ZNF491    | 0.0003 |
| NBPF22P   | 0.0003 |
| CSF1R     | 0.0003 |
| PDCL      | 0.0003 |
| RHOJ      | 0.0003 |
| CAMK2G    | 0.0003 |
| DUS3L     | 0.0003 |
| HLA-DPA1  | 0.0003 |
| MEIG1     | 0.0003 |
| SLC33A1   | 0.0003 |
| GAGE3     | 0.0003 |
| TSEN2     | 0.0003 |
| HARBI1    | 0.0003 |
| LINC00261 | 0.0003 |
| NT5C      | 0.0003 |

|              |        |
|--------------|--------|
| CNTROB       | 0.0003 |
| ELMOD1       | 0.0003 |
| MARCO        | 0.0003 |
| DHRS12       | 0.0003 |
| CDH24        | 0.0003 |
| TCAP         | 0.0003 |
| ARHGEF19     | 0.0003 |
| FNBP1L       | 0.0003 |
| MARK1        | 0.0003 |
| RABGEF1      | 0.0003 |
| CHRM5        | 0.0003 |
| TMED7        | 0.0003 |
| LOC729234    | 0.0003 |
| CD300E       | 0.0003 |
| PHLDA3       | 0.0003 |
| HOXB2        | 0.0003 |
| STAG3L1      | 0.0003 |
| NR4A3        | 0.0003 |
| DEFB105B     | 0.0003 |
| RNF13        | 0.0003 |
| PID1         | 0.0003 |
| SRR          | 0.0003 |
| SLC6A13      | 0.0003 |
| CSPG5        | 0.0003 |
| SMAD4        | 0.0003 |
| EFCAB3       | 0.0003 |
| SLC10A4      | 0.0003 |
| PLD2         | 0.0003 |
| PRAP1        | 0.0003 |
| EDNRB        | 0.0003 |
| CLN8         | 0.0003 |
| LOC100129447 | 0.0003 |
| PLN          | 0.0003 |
| PRLHR        | 0.0003 |
| LTBP3        | 0.0003 |
| ST3GAL1      | 0.0003 |
| TNFRSF10C    | 0.0003 |
| MUSK         | 0.0003 |
| HMOX2        | 0.0003 |
| LTF          | 0.0003 |
| PDE1B        | 0.0003 |
| C14orf79     | 0.0003 |
| PAPD7        | 0.0003 |
| SKP2         | 0.0003 |
| TIMMDC1      | 0.0003 |
| BAIAP2L2     | 0.0003 |

|              |        |
|--------------|--------|
| ST6GALNAC5   | 0.0003 |
| CLK1         | 0.0003 |
| RNLS         | 0.0003 |
| MCC          | 0.0003 |
| LRRC8A       | 0.0003 |
| IL4I1        | 0.0003 |
| LOC344887    | 0.0003 |
| PDGFRA       | 0.0003 |
| C1orf38      | 0.0003 |
| IKZF5        | 0.0003 |
| LOC100505854 | 0.0003 |
| IGFBP6       | 0.0003 |
| SWI5         | 0.0003 |
| CYP2C19      | 0.0003 |
| SNF8         | 0.0003 |
| PLD3         | 0.0003 |
| TIPRL        | 0.0003 |
| SHOC2        | 0.0003 |
| CTSG         | 0.0003 |
| MEA1         | 0.0003 |
| EDDM3A       | 0.0003 |
| MGC45800     | 0.0003 |
| TOPORS       | 0.0003 |
| S100A12      | 0.0003 |
| C20orf27     | 0.0003 |
| DGCR6        | 0.0003 |
| UGT2B15      | 0.0003 |
| PSEN2        | 0.0003 |
| EPHX2        | 0.0003 |
| GAS6         | 0.0003 |
| 6-Mar        | 0.0003 |
| MTA3         | 0.0003 |
| COL8A1       | 0.0003 |
| DUSP1        | 0.0003 |
| MMADHC       | 0.0003 |
| GALNT5       | 0.0003 |
| MORC3        | 0.0003 |
| LEPREL4      | 0.0003 |
| NPY          | 0.0003 |
| RHOQ         | 0.0003 |
| PVRL2        | 0.0003 |
| PROM2        | 0.0003 |
| MT1M         | 0.0003 |
| RPL26L1      | 0.0003 |
| RASEF        | 0.0003 |
| CCDC22       | 0.0003 |

|              |        |
|--------------|--------|
| WDR65        | 0.0003 |
| HDGFRP3      | 0.0003 |
| JDP2         | 0.0003 |
| CECR1        | 0.0003 |
| PTGR2        | 0.0003 |
| PROC         | 0.0003 |
| PARP10       | 0.0003 |
| C19orf43     | 0.0003 |
| EPB41L5      | 0.0003 |
| KIF15        | 0.0003 |
| KCNK1        | 0.0003 |
| APTX         | 0.0003 |
| ARPM1        | 0.0003 |
| LGI4         | 0.0003 |
| LOC100507629 | 0.0003 |
| CEP70        | 0.0003 |
| FAM182A      | 0.0003 |
| KPNA4        | 0.0003 |
| EML2         | 0.0003 |
| ZNF224       | 0.0003 |
| TRIM52       | 0.0003 |
| LOC728855    | 0.0003 |
| NLRP12       | 0.0003 |
| RSF1         | 0.0003 |
| TAAR9        | 0.0003 |
| UTP11L       | 0.0003 |
| BMP8B        | 0.0003 |
| HMG5         | 0.0003 |
| TAS2R20      | 0.0003 |
| ANKRD18B     | 0.0003 |
| RPGRIP1L     | 0.0003 |
| KIAA0408     | 0.0003 |
| PTGER4       | 0.0003 |
| CFI          | 0.0003 |
| ACVR1C       | 0.0003 |
| MAGED4B      | 0.0003 |
| ZNF177       | 0.0003 |
| HIGD1A       | 0.0003 |
| SPEG         | 0.0003 |
| CNR1         | 0.0003 |
| ZNF880       | 0.0003 |
| C14orf33     | 0.0003 |
| NCDN         | 0.0003 |
| C19orf40     | 0.0003 |
| FLJ35700     | 0.0003 |
| SPDYE3       | 0.0003 |



|              |        |
|--------------|--------|
| PEX5L-AS2    | 0.0003 |
| ZNF764       | 0.0003 |
| BARHL2       | 0.0003 |
| CD33         | 0.0003 |
| LOC442459    | 0.0003 |
| IRX2         | 0.0003 |
| PIK3R2       | 0.0003 |
| DLGAP4       | 0.0003 |
| GEMIN8       | 0.0003 |
| NECAB3       | 0.0003 |
| TMEM159      | 0.0003 |
| PIK3CA       | 0.0003 |
| SBF1         | 0.0003 |
| MYO1F        | 0.0003 |
| ZNF484       | 0.0003 |
| STARD8       | 0.0003 |
| EPCAM        | 0.0003 |
| MAP7D1       | 0.0003 |
| CDT1         | 0.0003 |
| PPAPDC1B     | 0.0003 |
| C17orf28     | 0.0003 |
| LPAR5        | 0.0003 |
| XPO7         | 0.0003 |
| EMR1         | 0.0003 |
| DLGAP2       | 0.0003 |
| ERC1         | 0.0003 |
| TAF9         | 0.0003 |
| RFPL2        | 0.0003 |
| CHRNA        | 0.0003 |
| TTY12        | 0.0003 |
| ATP6AP1      | 0.0003 |
| TRIM40       | 0.0003 |
| SYN1         | 0.0003 |
| PAX6         | 0.0003 |
| GRTP1        | 0.0003 |
| C7orf55      | 0.0003 |
| LINC00202    | 0.0002 |
| STX1A        | 0.0002 |
| BCAS1        | 0.0002 |
| LOC100129138 | 0.0002 |
| GAL3ST4      | 0.0002 |
| KIF19        | 0.0002 |
| KHSRP        | 0.0002 |
| PSMB9        | 0.0002 |
| TMED1        | 0.0002 |
| MIR100HG     | 0.0002 |

|              |        |
|--------------|--------|
| SERPINI2     | 0.0002 |
| ARF1         | 0.0002 |
| MBP          | 0.0002 |
| LOC100506630 | 0.0002 |
| GLA          | 0.0002 |
| ACTL8        | 0.0002 |
| ABHD5        | 0.0002 |
| RPL22        | 0.0002 |
| TSKS         | 0.0002 |
| WDFY2        | 0.0002 |
| CCL14        | 0.0002 |
| ETS2         | 0.0002 |
| C3orf39      | 0.0002 |
| YKT6         | 0.0002 |
| TMEM79       | 0.0002 |
| MCOLN3       | 0.0002 |
| ANKRD23      | 0.0002 |
| EFCAB4B      | 0.0002 |
| ZNF320       | 0.0002 |
| SAP30BP      | 0.0002 |
| RASAL2       | 0.0002 |
| XAB2         | 0.0002 |
| SPAG5        | 0.0002 |
| RFESD        | 0.0002 |
| RIPPLY1      | 0.0002 |
| ZNF691       | 0.0002 |
| LOC100506262 | 0.0002 |
| BTBD19       | 0.0002 |
| ANKRD28      | 0.0002 |
| ACTR3C       | 0.0002 |
| C4orf32      | 0.0002 |
| SYT5         | 0.0002 |
| C13orf33     | 0.0002 |
| LRRC29       | 0.0002 |
| ST13         | 0.0002 |
| PXN          | 0.0002 |
| ME3          | 0.0002 |
| EBI3         | 0.0002 |
| ACSS2        | 0.0002 |
| BGLAP        | 0.0002 |
| DTWD2        | 0.0002 |
| ZNF768       | 0.0002 |
| SNRPA1       | 0.0002 |
| ARL4C        | 0.0002 |
| PDS5A        | 0.0002 |
| SPERT        | 0.0002 |

|              |        |
|--------------|--------|
| KRT8P41      | 0.0002 |
| PALMD        | 0.0002 |
| CIC          | 0.0002 |
| MAF          | 0.0002 |
| SNN          | 0.0002 |
| LOC348840    | 0.0002 |
| TRIML2       | 0.0002 |
| CD200        | 0.0002 |
| SLAMF8       | 0.0002 |
| PPAN         | 0.0002 |
| MYD88        | 0.0002 |
| FLJ31958     | 0.0002 |
| LY75         | 0.0002 |
| C1orf43      | 0.0002 |
| TAF1B        | 0.0002 |
| MMP8         | 0.0002 |
| COMMD4       | 0.0002 |
| FAM105B      | 0.0002 |
| KIR2DL2      | 0.0002 |
| MCTP2        | 0.0002 |
| ZCCHC2       | 0.0002 |
| RASSF8       | 0.0002 |
| PPT1         | 0.0002 |
| HSD3B2       | 0.0002 |
| MCL1         | 0.0002 |
| PSMB10       | 0.0002 |
| LOC100128035 | 0.0002 |
| C8orf51      | 0.0002 |
| HMBOX1       | 0.0002 |
| CRELD1       | 0.0002 |
| CCRN4L       | 0.0002 |
| DIRAS2       | 0.0002 |
| CBR4         | 0.0002 |
| DPP10        | 0.0002 |
| FZD2         | 0.0002 |
| IKBKAP       | 0.0002 |
| SNAPC2       | 0.0002 |
| ND1          | 0.0002 |
| MGC16025     | 0.0002 |
| NFS1         | 0.0002 |
| ERMP1        | 0.0002 |
| NKAIN4       | 0.0002 |
| ZIC2         | 0.0002 |
| FAM169B      | 0.0002 |
| RFPL3-AS1    | 0.0002 |
| HIST2H4B     | 0.0002 |

|              |        |
|--------------|--------|
| LOC100133311 | 0.0002 |
| PPAP2B       | 0.0002 |
| ADARB2       | 0.0002 |
| UBE2K        | 0.0002 |
| NT5DC2       | 0.0002 |
| C21orf90     | 0.0002 |
| CDC42EP1     | 0.0002 |
| TLK2         | 0.0002 |
| RYR1         | 0.0002 |
| ST6GALNAC3   | 0.0002 |
| KLHL28       | 0.0002 |
| FAM164C      | 0.0002 |
| ARID5B       | 0.0002 |
| NTN4         | 0.0002 |
| TMEM14A      | 0.0002 |
| ZNF594       | 0.0002 |
| ZWINT        | 0.0002 |
| GBX2         | 0.0002 |
| METRNL       | 0.0002 |
| MUC1         | 0.0002 |
| CHAF1B       | 0.0002 |
| ZNF581       | 0.0002 |
| PRRC2A       | 0.0002 |
| C1orf127     | 0.0002 |
| C16orf58     | 0.0002 |
| MRGPRX1      | 0.0002 |
| SLC35F3      | 0.0002 |
| MACF1        | 0.0002 |
| HUS1B        | 0.0002 |
| HCAR1        | 0.0002 |
| FOXRED2      | 0.0002 |
| UFSP2        | 0.0002 |
| LOXL4        | 0.0002 |
| SMG9         | 0.0002 |
| NOMO1        | 0.0002 |
| ZNF517       | 0.0002 |
| CHRNA5       | 0.0002 |
| MYL12A       | 0.0002 |
| ITM2B        | 0.0002 |
| GPR39        | 0.0002 |
| C8orf39      | 0.0002 |
| GPRC5D       | 0.0002 |
| HTRA2        | 0.0002 |
| N4BP3        | 0.0002 |
| DNAJC6       | 0.0002 |
| RNH1         | 0.0002 |

|              |        |
|--------------|--------|
| CHCHD7       | 0.0002 |
| ZNF784       | 0.0002 |
| RSAD2        | 0.0002 |
| ZSWIM7       | 0.0002 |
| CD164        | 0.0002 |
| DACT1        | 0.0002 |
| PFKL         | 0.0002 |
| BROX         | 0.0002 |
| PLP2         | 0.0002 |
| RRBP1        | 0.0002 |
| CCDC77       | 0.0002 |
| PIP4K2B      | 0.0002 |
| KLHL6        | 0.0002 |
| PELI2        | 0.0002 |
| CGA          | 0.0002 |
| CRIP1        | 0.0002 |
| NEURL1B      | 0.0002 |
| RNF4         | 0.0002 |
| QPCT         | 0.0002 |
| GAN          | 0.0002 |
| CWH43        | 0.0002 |
| ZNF655       | 0.0002 |
| PLOD2        | 0.0002 |
| YPLR6490     | 0.0002 |
| CCP110       | 0.0002 |
| FLJ43860     | 0.0002 |
| BLZF1        | 0.0002 |
| FOXR1        | 0.0002 |
| ZNF736       | 0.0002 |
| LOC100130428 | 0.0002 |
| C1orf122     | 0.0002 |
| LPIN1        | 0.0002 |
| LOC388588    | 0.0002 |
| HCG27        | 0.0002 |
| CACNG6       | 0.0002 |
| MDM1         | 0.0002 |
| HIF1A        | 0.0002 |
| SERPINB6     | 0.0002 |
| SPZ1         | 0.0002 |
| ABAT         | 0.0002 |
| CLIP1        | 0.0002 |
| LEO1         | 0.0002 |
| MZF1         | 0.0002 |
| VAV1         | 0.0002 |
| ZNF616       | 0.0002 |
| CXXC4        | 0.0002 |

|              |        |
|--------------|--------|
| DNAJB2       | 0.0002 |
| ABT1         | 0.0002 |
| ZNF148       | 0.0002 |
| TBC1D1       | 0.0002 |
| C18orf54     | 0.0002 |
| POLN         | 0.0002 |
| TCF25        | 0.0002 |
| NTN5         | 0.0002 |
| FAM75B       | 0.0002 |
| PON1         | 0.0002 |
| PRPF3        | 0.0002 |
| LOC100653325 | 0.0002 |
| TXLNA        | 0.0002 |
| DHRX         | 0.0002 |
| HAUS4        | 0.0002 |
| PTK6         | 0.0002 |
| TTC4         | 0.0002 |
| SMARCA1      | 0.0002 |
| RTN2         | 0.0002 |
| HIST1H2BF    | 0.0002 |
| TH           | 0.0002 |
| MARS2        | 0.0002 |
| SLC25A15     | 0.0002 |
| SEC11A       | 0.0002 |
| HOXA6        | 0.0002 |
| HMGCL        | 0.0002 |
| LARS         | 0.0002 |
| C15orf26     | 0.0002 |
| MT4          | 0.0002 |
| KIF23        | 0.0002 |
| MEIS2        | 0.0002 |
| ZNF271       | 0.0002 |
| CCDC70       | 0.0002 |
| SPRYD7       | 0.0002 |
| C19orf44     | 0.0002 |
| FKBP15       | 0.0002 |
| GRID1        | 0.0002 |
| ENTHD1       | 0.0002 |
| SDK1         | 0.0002 |
| NDUFV3       | 0.0002 |
| DHX33        | 0.0002 |
| CPT2         | 0.0002 |
| LIN28A       | 0.0002 |
| CLEC4E       | 0.0002 |
| NPM3         | 0.0002 |
| PIAS3        | 0.0002 |

|              |        |
|--------------|--------|
| SH3D21       | 0.0002 |
| CAMSAP3      | 0.0002 |
| ZNF669       | 0.0002 |
| MTHFR        | 0.0002 |
| C11orf83     | 0.0002 |
| MCTP1        | 0.0002 |
| ADRB1        | 0.0002 |
| NKIRAS1      | 0.0002 |
| CASP8        | 0.0002 |
| CYB561       | 0.0002 |
| ABO          | 0.0002 |
| CA8          | 0.0002 |
| ZFAND2B      | 0.0002 |
| PSMC5        | 0.0002 |
| TUB          | 0.0002 |
| ZNF643       | 0.0002 |
| C6orf192     | 0.0002 |
| LYPLA1       | 0.0002 |
| LOC389607    | 0.0002 |
| CNGA4        | 0.0002 |
| GALNT10      | 0.0002 |
| DEDD         | 0.0002 |
| ACTR8        | 0.0002 |
| CLEC4M       | 0.0002 |
| C21orf67     | 0.0002 |
| ABCC10       | 0.0002 |
| SCN2A        | 0.0002 |
| SGCB         | 0.0002 |
| LOC100132363 | 0.0002 |
| UTS2R        | 0.0002 |
| RPA3         | 0.0002 |
| EMR2         | 0.0002 |
| DENND5B      | 0.0002 |
| TIMP4        | 0.0002 |
| NRN1L        | 0.0002 |
| ATP6         | 0.0002 |
| SHC2         | 0.0002 |
| ZFP90        | 0.0002 |
| RPL36A       | 0.0002 |
| TNFSF12      | 0.0002 |
| GABRA5       | 0.0002 |
| CATR1        | 0.0002 |
| OR10H1       | 0.0002 |
| NOP58        | 0.0002 |
| CEBPG        | 0.0002 |
| EGFEM1P      | 0.0002 |

|              |        |
|--------------|--------|
| USP12        | 0.0002 |
| ZNF468       | 0.0002 |
| FBXO42       | 0.0002 |
| PLK1S1       | 0.0002 |
| LCE2A        | 0.0002 |
| CIRBP        | 0.0002 |
| ELP4         | 0.0002 |
| RARS         | 0.0002 |
| EOMES        | 0.0002 |
| LAPTM4B      | 0.0002 |
| LMOD3        | 0.0002 |
| LOC100509814 | 0.0002 |
| FAR1         | 0.0002 |
| SOX15        | 0.0002 |
| PPAPDC2      | 0.0002 |
| OLIG1        | 0.0002 |
| HSDL2        | 0.0002 |
| SDC3         | 0.0002 |
| SNRNP70      | 0.0002 |
| USP16        | 0.0002 |
| LHFPL4       | 0.0002 |
| ZNF276       | 0.0002 |
| MIR133A1     | 0.0002 |
| GLTSCR2      | 0.0002 |
| TMEM158      | 0.0002 |
| CXCL14       | 0.0002 |
| SAMD1        | 0.0002 |
| ANGEL1       | 0.0002 |
| C6orf226     | 0.0002 |
| C21orf63     | 0.0002 |
| FAM133B      | 0.0002 |
| ZNF135       | 0.0002 |
| PTPLB        | 0.0002 |
| ST7          | 0.0002 |
| MAP7D2       | 0.0002 |
| GPR22        | 0.0002 |
| LOC100506930 | 0.0002 |
| HBXIP        | 0.0002 |
| HEPACAM      | 0.0002 |
| SERTAD1      | 0.0002 |
| RASSF10      | 0.0002 |
| CEP78        | 0.0002 |
| LRRC40       | 0.0002 |
| FICD         | 0.0002 |
| HOXA7        | 0.0002 |
| RPA2         | 0.0002 |



|              |        |
|--------------|--------|
| STK38L       | 0.0002 |
| POLE4        | 0.0002 |
| ZBTB12       | 0.0002 |
| CARD6        | 0.0002 |
| ANKRD52      | 0.0002 |
| C1orf53      | 0.0002 |
| TMEM239      | 0.0002 |
| POU1F1       | 0.0002 |
| GALNT8       | 0.0002 |
| RNF126       | 0.0002 |
| CCDC53       | 0.0002 |
| SLC5A4       | 0.0002 |
| ZNF133       | 0.0002 |
| ANXA8L2      | 0.0002 |
| HHIPL2       | 0.0002 |
| C15orf59     | 0.0002 |
| THOC5        | 0.0002 |
| MEGF10       | 0.0002 |
| C15orf61     | 0.0002 |
| LOC100130890 | 0.0002 |
| STRC         | 0.0002 |
| PTGIR        | 0.0002 |
| PHF15        | 0.0002 |
| GPRC5A       | 0.0002 |
| GRXCR1       | 0.0002 |
| RFWD2        | 0.0002 |
| MECR         | 0.0002 |
| AKR1E2       | 0.0002 |
| KIAA1407     | 0.0002 |
| ST3GAL4      | 0.0002 |
| ZNF565       | 0.0002 |
| C2orf82      | 0.0002 |
| BLVRA        | 0.0002 |
| USP32        | 0.0002 |
| NCKAP5       | 0.0002 |
| TNNI1        | 0.0002 |
| CHPF         | 0.0002 |
| CISD2        | 0.0002 |
| IDS          | 0.0002 |
| CYP24A1      | 0.0002 |
| OAS3         | 0.0002 |
| C12orf40     | 0.0002 |
| LRRTM3       | 0.0002 |
| AKAP3        | 0.0002 |
| IGJ          | 0.0002 |
| UPK3A        | 0.0002 |

|              |        |
|--------------|--------|
| ATP5S        | 0.0002 |
| LOC100192378 | 0.0002 |
| GRIK1        | 0.0002 |
| LOC100507429 | 0.0002 |
| METTL16      | 0.0002 |
| FOXF2        | 0.0002 |
| LOC441461    | 0.0002 |
| TMEM87A      | 0.0002 |
| NOSTRIN      | 0.0002 |
| BTBD16       | 0.0002 |
| SAR1B        | 0.0002 |
| FLJ20712     | 0.0002 |
| ADRA2C       | 0.0002 |
| RPAP2        | 0.0002 |
| PRSS38       | 0.0002 |
| EXOC3L4      | 0.0002 |
| INCENP       | 0.0002 |
| BRD3         | 0.0002 |
| C9orf85      | 0.0002 |
| IFT81        | 0.0002 |
| MED15        | 0.0002 |
| GRIA1        | 0.0002 |
| GLIPR1       | 0.0002 |
| LOC100133131 | 0.0002 |
| XIAP         | 0.0002 |
| LOC100506458 | 0.0002 |
| B3GALT1      | 0.0002 |
| ALDH1A2      | 0.0002 |
| CSNK1G3      | 0.0002 |
| ZNF862       | 0.0002 |
| ZNF709       | 0.0002 |
| DEPDC7       | 0.0002 |
| UBE2C        | 0.0002 |
| MMRN1        | 0.0002 |
| LYSMD2       | 0.0002 |
| ATP4B        | 0.0002 |
| SAMD13       | 0.0002 |
| LOC100653006 | 0.0002 |
| XRCC4        | 0.0002 |
| PHKA1        | 0.0002 |
| KANK2        | 0.0002 |
| RGPD5        | 0.0002 |
| CYP4F3       | 0.0002 |
| C10orf46     | 0.0002 |
| LOC100133161 | 0.0002 |
| YBX2         | 0.0002 |

|              |        |
|--------------|--------|
| KBTBD2       | 0.0002 |
| KIAA0391     | 0.0002 |
| KLF4         | 0.0002 |
| C3orf58      | 0.0002 |
| TP53BP2      | 0.0002 |
| POLG         | 0.0002 |
| TMEM120B     | 0.0002 |
| RIPK3        | 0.0002 |
| CD93         | 0.0002 |
| CEP55        | 0.0002 |
| SYMPK        | 0.0002 |
| ALMS1P       | 0.0002 |
| PMS2L2       | 0.0002 |
| LIN52        | 0.0002 |
| MLH3         | 0.0002 |
| MIOS         | 0.0002 |
| THSD7A       | 0.0002 |
| FLJ10661     | 0.0002 |
| C1GALT1C1    | 0.0002 |
| MYCBPAP      | 0.0002 |
| ZNF440       | 0.0002 |
| HIST1H3A     | 0.0002 |
| LOC100507651 | 0.0002 |
| KIF11        | 0.0002 |
| LOC389906    | 0.0002 |
| NOP16        | 0.0002 |
| C22orf32     | 0.0002 |
| NELL1        | 0.0002 |
| HIP1R        | 0.0002 |
| PAWR         | 0.0002 |
| MAPK8IP2     | 0.0002 |
| CDK17        | 0.0002 |
| GDPD3        | 0.0002 |
| FASTKD5      | 0.0002 |
| IL17RD       | 0.0002 |
| SCGB2A1      | 0.0002 |
| DNASE2       | 0.0002 |
| SHOX         | 0.0002 |
| ALS2CR11     | 0.0002 |
| RPL4         | 0.0002 |
| RALBP1       | 0.0002 |
| GSR          | 0.0002 |
| C6orf168     | 0.0002 |
| ND5          | 0.0002 |
| CASP14L      | 0.0002 |
| LOC100131289 | 0.0002 |

|           |        |
|-----------|--------|
| C8orf38   | 0.0002 |
| GLS2      | 0.0002 |
| ODAM      | 0.0002 |
| SERHL2    | 0.0002 |
| GYG2      | 0.0002 |
| SLC22A14  | 0.0002 |
| SLAMF7    | 0.0002 |
| OSBPL8    | 0.0002 |
| CLK3      | 0.0002 |
| MUSTN1    | 0.0002 |
| ANKRD40   | 0.0002 |
| LOC440040 | 0.0002 |
| JAG2      | 0.0002 |
| UBTD1     | 0.0002 |
| LOC650226 | 0.0002 |
| MUM1L1    | 0.0002 |
| SLC35E3   | 0.0002 |
| MEIS3     | 0.0002 |
| FAM86EP   | 0.0002 |
| CNOT3     | 0.0002 |
| GZF1      | 0.0002 |
| ANO8      | 0.0002 |
| MRI1      | 0.0002 |
| ZBTB45    | 0.0002 |
| CNTFR     | 0.0002 |
| FAM86C1   | 0.0002 |
| AGMAT     | 0.0002 |
| KLK2      | 0.0002 |
| APOL5     | 0.0002 |
| NAV2      | 0.0002 |
| TLN1      | 0.0002 |
| LOC645195 | 0.0002 |
| ATP2B2    | 0.0002 |
| ZNF250    | 0.0002 |
| KCNK10    | 0.0002 |
| ESPL1     | 0.0002 |
| IGFBP1    | 0.0002 |
| SLC12A3   | 0.0002 |
| NDUFS7    | 0.0002 |
| RANBP1    | 0.0002 |
| ZNF618    | 0.0002 |
| PNMA3     | 0.0002 |
| PDIA2     | 0.0002 |
| LCE1C     | 0.0002 |
| LOC93622  | 0.0002 |
| HAB1      | 0.0002 |

|           |        |
|-----------|--------|
| BBS5      | 0.0002 |
| PPEF1     | 0.0002 |
| SLC7A10   | 0.0002 |
| GUCY2F    | 0.0002 |
| NAT6      | 0.0002 |
| TRIM7     | 0.0002 |
| ATP5J2    | 0.0002 |
| MAK       | 0.0002 |
| THBS2     | 0.0002 |
| C18orf57  | 0.0002 |
| LOC157562 | 0.0002 |
| RP2       | 0.0002 |
| DDB1      | 0.0002 |
| EXT2      | 0.0002 |
| EPB41L2   | 0.0002 |
| VENTXP1   | 0.0002 |
| GDPD4     | 0.0002 |
| MRPL52    | 0.0002 |
| LOC729970 | 0.0002 |
| PSD2      | 0.0002 |
| SATB1     | 0.0002 |
| METTL8    | 0.0002 |
| LDB1      | 0.0002 |
| P2RY4     | 0.0002 |
| OAZ3      | 0.0002 |
| TMEM106A  | 0.0002 |
| ESR1      | 0.0002 |
| FCER2     | 0.0002 |
| KLK6      | 0.0002 |
| HOXC8     | 0.0002 |
| GPR142    | 0.0002 |
| LHX6      | 0.0002 |
| RBM10     | 0.0002 |
| ZNF268    | 0.0002 |
| TXLNG     | 0.0002 |
| FAM155B   | 0.0002 |
| HHLA3     | 0.0002 |
| FAM118B   | 0.0002 |
| TGFBR1    | 0.0002 |
| HENMT1    | 0.0002 |
| C17orf70  | 0.0002 |
| MET       | 0.0002 |
| MIER2     | 0.0002 |
| KCNK3     | 0.0002 |
| SETD2     | 0.0002 |
| VSIG10L   | 0.0002 |

|              |        |
|--------------|--------|
| RARB         | 0.0002 |
| LIMCH1       | 0.0002 |
| WAPAL        | 0.0002 |
| CRNDE        | 0.0002 |
| GCN1L1       | 0.0002 |
| C9           | 0.0002 |
| OR5F1        | 0.0002 |
| ARHGAP12     | 0.0002 |
| KCTD14       | 0.0002 |
| IQSEC3       | 0.0002 |
| LOC80054     | 0.0002 |
| NR1D1        | 0.0002 |
| ZNF213       | 0.0002 |
| POLR3C       | 0.0002 |
| CASC2        | 0.0002 |
| SBF2         | 0.0002 |
| COL6A3       | 0.0002 |
| FAT2         | 0.0002 |
| NLRP3        | 0.0002 |
| TRPC3        | 0.0002 |
| TMEM105      | 0.0002 |
| NRAP         | 0.0002 |
| BANF2        | 0.0002 |
| LPP          | 0.0002 |
| ZNF3         | 0.0002 |
| SNRNP48      | 0.0002 |
| ZNF818P      | 0.0002 |
| XRRA1        | 0.0002 |
| TMSB4X       | 0.0002 |
| FSD2         | 0.0002 |
| ITCH         | 0.0002 |
| HCCS         | 0.0002 |
| CABIN1       | 0.0002 |
| C18orf23     | 0.0002 |
| FAM207A      | 0.0002 |
| KCNIP3       | 0.0002 |
| LOC100507266 | 0.0002 |
| TTC12        | 0.0002 |
| SIKE1        | 0.0002 |
| IER3IP1      | 0.0002 |
| RAB11FIP2    | 0.0002 |
| FUCA1        | 0.0002 |
| SLC38A7      | 0.0002 |
| ACBD6        | 0.0002 |
| KRT36        | 0.0002 |
| LOC730227    | 0.0002 |

|              |        |
|--------------|--------|
| LOC100507599 | 0.0002 |
| TRAF6        | 0.0002 |
| ART4         | 0.0002 |
| MSI2         | 0.0002 |
| C5orf32      | 0.0002 |
| FTHL17       | 0.0002 |
| ZFP64        | 0.0002 |
| DRD1         | 0.0002 |
| LOC57399     | 0.0002 |
| LOC100506234 | 0.0002 |
| SLC43A2      | 0.0002 |
| LOC100505890 | 0.0002 |
| ARGLU1       | 0.0002 |
| C5orf62      | 0.0002 |
| AOC4         | 0.0002 |
| CCDC108      | 0.0002 |
| CCK          | 0.0002 |
| THRSP        | 0.0002 |
| NAGPA        | 0.0002 |
| TNFRSF6B     | 0.0002 |
| PLAT         | 0.0002 |
| C9orf68      | 0.0002 |
| CCDC86       | 0.0002 |
| TGFB2        | 0.0002 |
| FAM183A      | 0.0002 |
| LOC100652739 | 0.0002 |
| CTC1         | 0.0002 |
| HRK          | 0.0002 |
| ZNF673       | 0.0002 |
| C6orf64      | 0.0002 |
| LOC92249     | 0.0002 |
| DTD1         | 0.0002 |
| BCL6         | 0.0002 |
| ZNF853       | 0.0002 |
| GNMT         | 0.0002 |
| LENG8        | 0.0002 |
| NHSL1        | 0.0002 |
| CYTIP        | 0.0002 |
| KIAA1486     | 0.0002 |
| COBL         | 0.0002 |
| LCE1B        | 0.0002 |
| CHID1        | 0.0002 |
| GPRC5C       | 0.0002 |
| SNX3         | 0.0002 |
| SLC4A4       | 0.0002 |
| CD4          | 0.0002 |

|              |        |
|--------------|--------|
| PPP2R3A      | 0.0002 |
| TIFA         | 0.0002 |
| C1QL1        | 0.0002 |
| CBLC         | 0.0002 |
| LOC100128922 | 0.0002 |
| SDR39U1      | 0.0002 |
| FAM123B      | 0.0002 |
| SCARB2       | 0.0002 |
| NSUN3        | 0.0002 |
| SEMA6A       | 0.0002 |
| CLCA4        | 0.0002 |
| ARHGAP32     | 0.0002 |
| NUDT14       | 0.0002 |
| NDUFB10      | 0.0002 |
| LOC100129196 | 0.0002 |
| TM7SF3       | 0.0002 |
| GSTT2        | 0.0002 |
| SMARCD3      | 0.0002 |
| AKAP10       | 0.0002 |
| FA2H         | 0.0002 |
| ERRFI1       | 0.0002 |
| SIK3         | 0.0002 |
| PAQR6        | 0.0002 |
| NANS         | 0.0002 |
| SPINK2       | 0.0002 |
| C4BPA        | 0.0002 |
| PHLDA1       | 0.0002 |
| FAM114A1     | 0.0002 |
| SZT2         | 0.0002 |
| SLC2A11      | 0.0002 |
| LONRF2       | 0.0002 |
| PKP3         | 0.0002 |
| IFIT1        | 0.0002 |
| MTBP         | 0.0002 |
| LOC100507254 | 0.0002 |
| KATNAL2      | 0.0002 |
| LOC643733    | 0.0002 |
| KTI12        | 0.0002 |
| MIDN         | 0.0002 |
| TIMM17B      | 0.0002 |
| TKTL2        | 0.0002 |
| PGPEP1       | 0.0002 |
| TMEM185B     | 0.0002 |
| POMP         | 0.0002 |
| ZDHHC14      | 0.0002 |
| C2orf63      | 0.0002 |



|               |        |
|---------------|--------|
| SMPX          | 0.0002 |
| ITIH5         | 0.0002 |
| UBE2Z         | 0.0002 |
| LOC285548     | 0.0002 |
| RBM23         | 0.0002 |
| OTOF          | 0.0002 |
| CD302         | 0.0002 |
| C15orf52      | 0.0002 |
| P2RX4         | 0.0002 |
| TBX21         | 0.0002 |
| PIK3R3        | 0.0002 |
| DCN           | 0.0002 |
| UNC45A        | 0.0002 |
| LOC100131532  | 0.0002 |
| SCAND2        | 0.0002 |
| GHRHR         | 0.0002 |
| STON1-GTF2A1L | 0.0002 |
| SLC2A14       | 0.0002 |
| SNX6          | 0.0002 |
| LOC100288432  | 0.0002 |
| B3GNT2        | 0.0002 |
| PSG6          | 0.0002 |
| KIF21A        | 0.0002 |
| TMEM169       | 0.0002 |
| CLC           | 0.0002 |
| ACD           | 0.0002 |
| HMGN2P46      | 0.0002 |
| NCS1          | 0.0002 |
| SPINK1        | 0.0002 |
| REPS2         | 0.0002 |
| NEK8          | 0.0002 |
| CXorf41       | 0.0002 |
| GLTP          | 0.0002 |
| RAB40B        | 0.0002 |
| F2RL3         | 0.0002 |
| LOC100507630  | 0.0002 |
| RASSF5        | 0.0002 |
| SNAI1         | 0.0002 |
| ABCG5         | 0.0002 |
| C1orf194      | 0.0002 |
| SRD5A3        | 0.0002 |
| TYW3          | 0.0002 |
| ALOXE3        | 0.0002 |
| GLB1L3        | 0.0002 |
| OXER1         | 0.0002 |
| ATP8A2        | 0.0002 |

|          |        |
|----------|--------|
| STARD3   | 0.0002 |
| MAPK12   | 0.0002 |
| MAZ      | 0.0002 |
| NFKBIZ   | 0.0002 |
| OVGP1    | 0.0002 |
| FBXO9    | 0.0002 |
| BAIAP2   | 0.0002 |
| LOC90246 | 0.0002 |
| GAL      | 0.0002 |
| CIB2     | 0.0002 |
| PDCD5    | 0.0002 |
| ATM      | 0.0002 |
| GDF1     | 0.0002 |
| IQCD     | 0.0002 |
| CREB3L4  | 0.0002 |
| IL16     | 0.0002 |
| NRBP2    | 0.0002 |
| ZNF174   | 0.0002 |
| WDR90    | 0.0002 |
| ABL2     | 0.0002 |
| PPP2R4   | 0.0002 |
| HINT3    | 0.0002 |
| ACSS1    | 0.0002 |
| RXFP2    | 0.0002 |
| RTP4     | 0.0002 |
| TUBE1    | 0.0002 |
| PSIP1    | 0.0002 |
| FAM89B   | 0.0002 |
| CRYGD    | 0.0002 |
| IGSF11   | 0.0002 |
| ATF3     | 0.0002 |
| COQ3     | 0.0002 |
| FRG2     | 0.0002 |
| AURKC    | 0.0002 |
| FAM90A1  | 0.0002 |
| DHX36    | 0.0002 |
| ASPRV1   | 0.0002 |
| FGFR1    | 0.0002 |
| FUBP1    | 0.0002 |
| PRSS58   | 0.0002 |
| C3orf32  | 0.0002 |
| FLT3LG   | 0.0002 |
| GSC      | 0.0002 |
| FONG     | 0.0002 |
| UBP1     | 0.0002 |
| SIRT1    | 0.0002 |

|              |        |
|--------------|--------|
| MAEL         | 0.0002 |
| AADAT        | 0.0002 |
| CENPT        | 0.0002 |
| LPL          | 0.0002 |
| SLC25A24     | 0.0002 |
| FBXL18       | 0.0002 |
| C9orf153     | 0.0002 |
| MED13L       | 0.0002 |
| COQ10B       | 0.0002 |
| AKT1         | 0.0002 |
| GPR141       | 0.0002 |
| LRRFIP2      | 0.0002 |
| IQGAP1       | 0.0002 |
| LOC100506046 | 0.0002 |
| LOC100652972 | 0.0002 |
| GNG5         | 0.0002 |
| TYW1         | 0.0002 |
| ZNF671       | 0.0002 |
| BTBD7        | 0.0002 |
| DCAF13       | 0.0002 |
| P2RY10       | 0.0002 |
| PRKCE        | 0.0002 |
| TRAPPC9      | 0.0002 |
| PLOD1        | 0.0002 |
| GNB1L        | 0.0002 |
| TNFRSF18     | 0.0002 |
| NEDD8        | 0.0002 |
| TINAG        | 0.0002 |
| IFNAR1       | 0.0002 |
| MAS1         | 0.0002 |
| KLHL34       | 0.0002 |
| ACTL7B       | 0.0002 |
| LOH12CR2     | 0.0002 |
| TMEM232      | 0.0002 |
| TCF19        | 0.0002 |
| NDUFA3       | 0.0002 |
| C20orf196    | 0.0002 |
| TTC28        | 0.0002 |
| FXYD3        | 0.0002 |
| LOC100287216 | 0.0002 |
| MFS1         | 0.0002 |
| FAM151A      | 0.0002 |
| TDRD9        | 0.0002 |
| CROCCP2      | 0.0002 |
| USP45        | 0.0002 |
| SH3TC1       | 0.0002 |

|              |        |
|--------------|--------|
| PTPN4        | 0.0002 |
| ATP6V1E2     | 0.0002 |
| LINC00313    | 0.0002 |
| RAB35        | 0.0002 |
| NAPRT1       | 0.0002 |
| FAM26F       | 0.0002 |
| PLXNB1       | 0.0002 |
| TMEM170A     | 0.0002 |
| GATM         | 0.0002 |
| HMGA1        | 0.0002 |
| HLA-DQA1     | 0.0002 |
| ZNF215       | 0.0002 |
| ZNFX1        | 0.0002 |
| GPS2         | 0.0002 |
| EFHA2        | 0.0002 |
| RTTN         | 0.0002 |
| AHR          | 0.0002 |
| POT1         | 0.0002 |
| C17orf62     | 0.0002 |
| DHX35        | 0.0002 |
| MUC2         | 0.0002 |
| SNAPC5       | 0.0002 |
| PNPLA8       | 0.0002 |
| KLF2         | 0.0002 |
| HHEX         | 0.0002 |
| GRK6         | 0.0002 |
| KCTD5        | 0.0002 |
| CST7         | 0.0002 |
| RWDD2B       | 0.0002 |
| RNF128       | 0.0002 |
| NSUN6        | 0.0002 |
| NFXL1        | 0.0002 |
| CD300LG      | 0.0002 |
| TMEM8A       | 0.0002 |
| ARL14        | 0.0002 |
| COMMD5       | 0.0002 |
| MGLL         | 0.0002 |
| SLC26A8      | 0.0002 |
| ANKAR        | 0.0002 |
| FAM21C       | 0.0002 |
| LOC100288721 | 0.0002 |
| SESTD1       | 0.0002 |
| RRM2B        | 0.0002 |
| C9orf43      | 0.0002 |
| COX3         | 0.0002 |
| IFI44L       | 0.0002 |

|              |        |
|--------------|--------|
| MYF6         | 0.0002 |
| LOC100129620 | 0.0002 |
| PPAP2A       | 0.0002 |
| C20orf24     | 0.0002 |
| TFAM         | 0.0002 |
| AKAP17A      | 0.0002 |
| PRMT3        | 0.0002 |
| LPCAT2       | 0.0002 |
| C21orf62     | 0.0002 |
| PIGM         | 0.0002 |
| GSTM5        | 0.0002 |
| TRAF4        | 0.0002 |
| HSPB8        | 0.0002 |
| EIF3D        | 0.0002 |
| PLXDC1       | 0.0002 |
| TMEM138      | 0.0002 |
| DNAJC27      | 0.0002 |
| FBXL13       | 0.0002 |
| ZBTB24       | 0.0002 |
| LOC100130507 | 0.0002 |
| MGAT5        | 0.0002 |
| PIGF         | 0.0002 |
| RPUSD3       | 0.0002 |
| PPP1R1C      | 0.0002 |
| ZNF319       | 0.0002 |
| LPPR5        | 0.0002 |
| NACAP1       | 0.0002 |
| ZBTB38       | 0.0002 |
| GNG3         | 0.0002 |
| STAG3        | 0.0002 |
| LOC100506779 | 0.0002 |
| SMC4         | 0.0002 |
| LYPLA2       | 0.0002 |
| TNFSF13      | 0.0002 |
| LOC100130264 | 0.0002 |
| FAM149B1     | 0.0002 |
| METTL7A      | 0.0002 |
| ADAM32       | 0.0002 |
| MDK          | 0.0002 |
| CRLF2        | 0.0002 |
| HIST1H2BI    | 0.0002 |
| UPF1         | 0.0002 |
| FEM1C        | 0.0002 |
| TMEM190      | 0.0002 |
| SGSH         | 0.0002 |
| KIF6         | 0.0002 |

|          |        |
|----------|--------|
| TRIM39   | 0.0002 |
| ZNF596   | 0.0002 |
| SYT13    | 0.0002 |
| TEX14    | 0.0002 |
| DSCR10   | 0.0002 |
| TBC1D29  | 0.0002 |
| LMOD2    | 0.0002 |
| ANKRD24  | 0.0002 |
| GAFA1    | 0.0002 |
| TMEM161A | 0.0002 |
| LRRC42   | 0.0002 |
| TNMD     | 0.0002 |
| RPL36AL  | 0.0002 |
| S1PR2    | 0.0002 |
| ZNF528   | 0.0002 |
| DAPK3    | 0.0002 |
| FAM19A3  | 0.0002 |
| SMC1A    | 0.0002 |
| SYT16    | 0.0002 |
| HOOK1    | 0.0002 |
| BAZ1B    | 0.0002 |
| FOXO1    | 0.0002 |
| CTDSPL   | 0.0002 |
| UQCRFS1  | 0.0002 |
| VAMP5    | 0.0002 |
| TM4SF18  | 0.0002 |
| CDK15    | 0.0002 |
| SLC25A13 | 0.0002 |
| HMHB1    | 0.0002 |
| GPHN     | 0.0002 |
| PRRT2    | 0.0002 |
| ILF2     | 0.0002 |
| RRAGC    | 0.0002 |
| LRP3     | 0.0002 |
| NEK2     | 0.0002 |
| RAD21L1  | 0.0002 |
| PSMA8    | 0.0002 |
| C1orf96  | 0.0002 |
| H2AFV    | 0.0002 |
| CHRM1    | 0.0002 |
| UCHL5    | 0.0002 |
| XCL1     | 0.0002 |
| RNF175   | 0.0002 |
| EEF1E1   | 0.0002 |
| ADH1A    | 0.0002 |
| SYCP2    | 0.0002 |

|               |        |
|---------------|--------|
| ELOVL1        | 0.0002 |
| SPAG16        | 0.0002 |
| TMEM126B      | 0.0002 |
| WDR62         | 0.0002 |
| ATG5          | 0.0002 |
| MPO           | 0.0002 |
| SEMA3G        | 0.0002 |
| TAC3          | 0.0002 |
| HERC6         | 0.0002 |
| KCNK9         | 0.0002 |
| PLCE1         | 0.0002 |
| PPM1D         | 0.0002 |
| PMS2P1        | 0.0002 |
| MBLAC1        | 0.0002 |
| LOC100506165  | 0.0002 |
| HAS2          | 0.0002 |
| DYNLL1        | 0.0002 |
| DKFZP434I0714 | 0.0002 |
| C8G           | 0.0002 |
| CASP9         | 0.0002 |
| ABCC11        | 0.0002 |
| CARTPT        | 0.0002 |
| ZFPM1         | 0.0002 |
| COX5B         | 0.0002 |
| RXFP1         | 0.0002 |
| LOC100270746  | 0.0002 |
| ZHX1          | 0.0002 |
| MTIF2         | 0.0002 |
| ITGA11        | 0.0002 |
| WDR66         | 0.0002 |
| TAF7          | 0.0002 |
| ADAM8         | 0.0002 |
| ENSA          | 0.0002 |
| PDZD8         | 0.0002 |
| TUSC1         | 0.0002 |
| ZNF138        | 0.0002 |
| TBXA2R        | 0.0002 |
| MMP10         | 0.0002 |
| CMYA5         | 0.0002 |
| CECR5         | 0.0002 |
| UGDH          | 0.0002 |
| CEP19         | 0.0002 |
| ASS1          | 0.0002 |
| GSTM2P1       | 0.0002 |
| GEM           | 0.0002 |
| MAN2A1        | 0.0002 |

|           |        |
|-----------|--------|
| ODZ1      | 0.0002 |
| CCDC83    | 0.0002 |
| LIPE      | 0.0002 |
| KDELC2    | 0.0002 |
| OR2T5     | 0.0002 |
| AP1M1     | 0.0002 |
| UACA      | 0.0002 |
| ATCAY     | 0.0002 |
| KDELR3    | 0.0002 |
| FRAT1     | 0.0002 |
| EFNA3     | 0.0002 |
| CCDC122   | 0.0002 |
| DAD1      | 0.0002 |
| OPN5      | 0.0002 |
| EPN1      | 0.0002 |
| DCBLD1    | 0.0002 |
| HLA-DRB1  | 0.0002 |
| ADAMTS10  | 0.0002 |
| TUBB1     | 0.0002 |
| IBSP      | 0.0002 |
| TMX4      | 0.0002 |
| SLC39A13  | 0.0002 |
| FCRL5     | 0.0002 |
| AXIN2     | 0.0002 |
| PRICKLE2  | 0.0002 |
| ANKRD36   | 0.0002 |
| C1orf198  | 0.0002 |
| COL4A2    | 0.0002 |
| SP140     | 0.0002 |
| GRAMD1A   | 0.0002 |
| FAM83A    | 0.0002 |
| RAI1      | 0.0002 |
| C2orf76   | 0.0002 |
| LOC158696 | 0.0002 |
| JAG1      | 0.0002 |
| HTR1E     | 0.0002 |
| EWSR1     | 0.0002 |
| TRAK1     | 0.0002 |
| ADAT2     | 0.0002 |
| ZNF219    | 0.0002 |
| C4orf33   | 0.0002 |
| ISOC2     | 0.0002 |
| PRAMEF3   | 0.0002 |
| SLC2A4RG  | 0.0002 |
| TYSND1    | 0.0002 |
| PDCD2L    | 0.0002 |



|              |        |
|--------------|--------|
| ELF2         | 0.0002 |
| SH2D1B       | 0.0002 |
| LOC100652824 | 0.0002 |
| SCO2         | 0.0002 |
| EFTUD2       | 0.0002 |
| FAM19A2      | 0.0002 |
| TCIRG1       | 0.0002 |
| C6orf136     | 0.0002 |
| SLC26A9      | 0.0002 |
| MYO15A       | 0.0002 |
| FAM114A2     | 0.0002 |
| DNAJA1       | 0.0002 |
| TSGA10       | 0.0002 |
| FAM74A3      | 0.0002 |
| HSF2         | 0.0002 |
| GJA9         | 0.0002 |
| DEAF1        | 0.0002 |
| CRADD        | 0.0002 |
| SLC22A11     | 0.0002 |
| SP100        | 0.0002 |
| MYO10        | 0.0002 |
| AUP1         | 0.0002 |
| OCA2         | 0.0002 |
| ADAM17       | 0.0002 |
| DBNL         | 0.0002 |
| RSBN1L       | 0.0002 |
| ABHD2        | 0.0002 |
| PRKCB        | 0.0002 |
| DKK1         | 0.0002 |
| LELP1        | 0.0002 |
| C1orf123     | 0.0002 |
| GIPC3        | 0.0002 |
| CIDEA        | 0.0002 |
| SMC6         | 0.0002 |
| HLA-E        | 0.0002 |
| DLEU2        | 0.0002 |
| NEK11        | 0.0002 |
| SERPINF1     | 0.0002 |
| FAM86B2      | 0.0002 |
| SLC39A1      | 0.0002 |
| FFAR3        | 0.0002 |
| STX8         | 0.0002 |
| SYNGR2       | 0.0002 |
| MYNN         | 0.0002 |
| RGS9BP       | 0.0002 |
| CENPQ        | 0.0002 |

|              |        |
|--------------|--------|
| PLA2G3       | 0.0002 |
| FAM111A      | 0.0002 |
| BAIAP2L1     | 0.0002 |
| XAGE1A       | 0.0002 |
| ARRB2        | 0.0002 |
| LOC151658    | 0.0002 |
| LOC100505478 | 0.0002 |
| GTF2B        | 0.0002 |
| PABPN1       | 0.0002 |
| GOLGA2P5     | 0.0002 |
| ANAPC1       | 0.0002 |
| LOC100506769 | 0.0002 |
| LGALS2       | 0.0002 |
| PDE6H        | 0.0002 |
| PLCH1        | 0.0002 |
| SLC29A4      | 0.0002 |
| SMO          | 0.0002 |
| KDM3B        | 0.0002 |
| TRIM74       | 0.0002 |
| TGIF1        | 0.0002 |
| FANCL        | 0.0002 |
| TOP1P2       | 0.0002 |
| CDS1         | 0.0002 |
| PALLD        | 0.0002 |
| PTGS1        | 0.0002 |
| TSPAN11      | 0.0002 |
| ALG11        | 0.0002 |
| GMCL1        | 0.0002 |
| USP28        | 0.0002 |
| NUFIP2       | 0.0002 |
| SHROOM4      | 0.0002 |
| LRRC27       | 0.0002 |
| DDX58        | 0.0002 |
| ARMC10       | 0.0002 |
| VAMP8        | 0.0002 |
| FSTL1        | 0.0002 |
| OR10G8       | 0.0002 |
| FAM25A       | 0.0002 |
| ZSCAN12      | 0.0002 |
| STH          | 0.0002 |
| ADAL         | 0.0002 |
| EIF3A        | 0.0002 |
| POC1A        | 0.0002 |
| ATP1A3       | 0.0002 |
| DDX28        | 0.0002 |
| HNRNPK       | 0.0002 |

|              |        |
|--------------|--------|
| LOC645249    | 0.0002 |
| OR10J5       | 0.0002 |
| RBM27        | 0.0002 |
| ZFP3         | 0.0002 |
| LOC152586    | 0.0002 |
| OR8J1        | 0.0002 |
| GNB1         | 0.0002 |
| ARF5         | 0.0002 |
| ZNF99        | 0.0002 |
| MCART3P      | 0.0002 |
| IL12RB1      | 0.0002 |
| CPXM1        | 0.0002 |
| TBCB         | 0.0002 |
| PTCRA        | 0.0002 |
| HSDL1        | 0.0002 |
| FAM197Y2P    | 0.0002 |
| BCAT2        | 0.0002 |
| NPY1R        | 0.0002 |
| FABP4        | 0.0002 |
| A4GNT        | 0.0002 |
| KIAA1462     | 0.0002 |
| ACOT11       | 0.0002 |
| ENAH         | 0.0002 |
| LOC283454    | 0.0002 |
| ZNF541       | 0.0002 |
| TTBK1        | 0.0002 |
| TTY9A        | 0.0002 |
| SERINC5      | 0.0002 |
| SIPA1L1      | 0.0002 |
| MYB          | 0.0002 |
| LOC100507468 | 0.0002 |
| SLC16A12     | 0.0002 |
| SPAG7        | 0.0002 |
| C19orf22     | 0.0002 |
| RFTN2        | 0.0002 |
| SOX8         | 0.0002 |
| PIWIL4       | 0.0002 |
| SLITRK4      | 0.0002 |
| NOA1         | 0.0002 |
| N4BP1        | 0.0002 |
| PLCZ1        | 0.0002 |
| ARHGEF12     | 0.0002 |
| WASF2        | 0.0002 |
| BCHE         | 0.0002 |
| TBX3         | 0.0002 |
| SLC22A13     | 0.0002 |

|              |        |
|--------------|--------|
| RDM1         | 0.0002 |
| HYAL1        | 0.0002 |
| RPL23AP53    | 0.0002 |
| DEFB4A       | 0.0002 |
| OR8K3        | 0.0002 |
| HDAC7        | 0.0002 |
| DIP2A        | 0.0002 |
| ZFP30        | 0.0002 |
| FAM109A      | 0.0002 |
| CLEC7A       | 0.0002 |
| ATP6AP2      | 0.0002 |
| FAM13A       | 0.0002 |
| VPS39        | 0.0002 |
| C6           | 0.0002 |
| CCDC13       | 0.0002 |
| LAX1         | 0.0002 |
| CST11        | 0.0002 |
| CAMLG        | 0.0002 |
| TLCD2        | 0.0002 |
| RPS14        | 0.0002 |
| ARHGAP24     | 0.0002 |
| PPP1R14A     | 0.0002 |
| NLRC3        | 0.0002 |
| MEFV         | 0.0002 |
| PCDHB15      | 0.0002 |
| MGEA5        | 0.0002 |
| NDUFAF3      | 0.0002 |
| C20orf195    | 0.0002 |
| PTTG3P       | 0.0002 |
| LOC100505702 | 0.0002 |
| ZNF32        | 0.0002 |
| SRA1         | 0.0002 |
| GSTM3        | 0.0002 |
| ALOX15B      | 0.0002 |
| TMPRSS13     | 0.0002 |
| GUSBP4       | 0.0002 |
| ZNF366       | 0.0002 |
| KLHL10       | 0.0002 |
| BCLAF1       | 0.0002 |
| KLRC3        | 0.0002 |
| PYCARD       | 0.0002 |
| PFN2         | 0.0002 |
| LDLR         | 0.0002 |
| KIAA1530     | 0.0002 |
| C16orf87     | 0.0002 |
| NOL6         | 0.0002 |

|              |        |
|--------------|--------|
| MFSD5        | 0.0002 |
| CCNB3        | 0.0002 |
| THAP10       | 0.0002 |
| NDC80        | 0.0002 |
| ITGB7        | 0.0002 |
| FAM82A2      | 0.0002 |
| CHRNA3       | 0.0002 |
| GLRB         | 0.0002 |
| TRIM37       | 0.0002 |
| SMARCA1      | 0.0002 |
| ZNF181       | 0.0002 |
| C6orf52      | 0.0002 |
| LOC100287704 | 0.0002 |
| NMUR1        | 0.0002 |
| BIRC2        | 0.0002 |
| C15orf56     | 0.0002 |
| BPIFB1       | 0.0002 |
| AKAP2        | 0.0002 |
| MPND         | 0.0002 |
| ARRB1        | 0.0002 |
| LOC100506236 | 0.0002 |
| CD276        | 0.0002 |
| RPS16        | 0.0002 |
| HERC5        | 0.0002 |
| MMP15        | 0.0002 |
| GDEP         | 0.0002 |
| TUBB8        | 0.0002 |
| C22orf26     | 0.0002 |
| PRPF31       | 0.0002 |
| HYAL4        | 0.0002 |
| MLPH         | 0.0002 |
| ATP5L        | 0.0002 |
| LOC647107    | 0.0002 |
| CRY2         | 0.0002 |
| LCE3D        | 0.0002 |
| MRPL27       | 0.0002 |
| MOB2         | 0.0002 |
| CYP4F8       | 0.0002 |
| PPFIA4       | 0.0002 |
| SMAP2        | 0.0002 |
| CADM1        | 0.0002 |
| PI4KAP2      | 0.0002 |
| CCDC151      | 0.0002 |
| KCNK12       | 0.0002 |
| LAMA3        | 0.0002 |
| ATAD3C       | 0.0002 |

|              |        |
|--------------|--------|
| LOC100506174 | 0.0002 |
| NKX6-1       | 0.0002 |
| LOC401052    | 0.0002 |
| MYT1L        | 0.0002 |
| SLC4A9       | 0.0002 |
| PCDHB12      | 0.0002 |
| EHD2         | 0.0002 |
| BAGE         | 0.0002 |
| PPAPDC1A     | 0.0002 |
| RG9MTD1      | 0.0002 |
| HHLA1        | 0.0002 |
| CBFB         | 0.0002 |
| NDUFB6       | 0.0002 |
| SMARCA4      | 0.0002 |
| COL11A1      | 0.0002 |
| LOC284837    | 0.0002 |
| BACH1        | 0.0002 |
| GPR3         | 0.0002 |
| ZSCAN29      | 0.0002 |
| ZNF519       | 0.0002 |
| HBS1L        | 0.0002 |
| LRRFIP1      | 0.0002 |
| FAM83D       | 0.0002 |
| DHODH        | 0.0002 |
| MAU2         | 0.0002 |
| FLNC         | 0.0002 |
| MAFF         | 0.0002 |
| CD300LF      | 0.0002 |
| PDGFC        | 0.0002 |
| CYP1A1       | 0.0002 |
| WNT8A        | 0.0002 |
| KIAA0894     | 0.0002 |
| LOC100653227 | 0.0002 |
| KIAA0564     | 0.0002 |
| SETD8        | 0.0002 |
| SNAP25       | 0.0002 |
| KCNJ13       | 0.0002 |
| LOC400550    | 0.0002 |
| GLT25D2      | 0.0002 |
| KCNH6        | 0.0002 |
| OR2H1        | 0.0002 |
| CDH13        | 0.0002 |
| DSG2         | 0.0002 |
| TGM1         | 0.0002 |
| MYO1E        | 0.0002 |
| ASTL         | 0.0002 |

|              |        |
|--------------|--------|
| CKAP4        | 0.0002 |
| P2RY13       | 0.0002 |
| CLMP         | 0.0002 |
| LOC645722    | 0.0002 |
| RASGEF1A     | 0.0002 |
| RLIM         | 0.0002 |
| ZBTB40       | 0.0002 |
| TMED2        | 0.0002 |
| LRRC14       | 0.0002 |
| PKDREJ       | 0.0002 |
| UPK2         | 0.0002 |
| CALN1        | 0.0002 |
| CA14         | 0.0002 |
| CLEC12A      | 0.0002 |
| RBM45        | 0.0002 |
| CPA2         | 0.0002 |
| ZNF295-AS1   | 0.0002 |
| LOC100505971 | 0.0002 |
| CYP2A7       | 0.0002 |
| FADD         | 0.0002 |
| PODXL2       | 0.0002 |
| LOC100506455 | 0.0002 |
| SIRT2        | 0.0002 |
| AKIRIN2      | 0.0002 |
| TWIST2       | 0.0002 |
| SHROOM2      | 0.0002 |
| LOC100422737 | 0.0002 |
| TMPRSS12     | 0.0002 |
| SLC6A7       | 0.0002 |
| RILPL2       | 0.0002 |
| PCGF1        | 0.0002 |
| GPATCH8      | 0.0002 |
| MAP3K10      | 0.0002 |
| PLAC2        | 0.0002 |
| AHDC1        | 0.0002 |
| ZNF444       | 0.0002 |
| SCGB1C1      | 0.0002 |
| TAL2         | 0.0002 |
| IQCC         | 0.0002 |
| RIOK2        | 0.0002 |
| TMEM117      | 0.0002 |
| PQBP1        | 0.0002 |
| TBCCD1       | 0.0002 |
| NEDD4        | 0.0002 |
| UXT          | 0.0002 |
| EPS8L1       | 0.0002 |

|           |        |
|-----------|--------|
| ST3GAL5   | 0.0002 |
| PXDNL     | 0.0002 |
| C9orf21   | 0.0002 |
| UBE2E2    | 0.0002 |
| OR8D1     | 0.0002 |
| PTDSS2    | 0.0002 |
| ITGA2B    | 0.0002 |
| FAM90A7   | 0.0002 |
| CENPBD1   | 0.0002 |
| NAV3      | 0.0002 |
| LINC00113 | 0.0002 |
| C5        | 0.0002 |
| GJB4      | 0.0002 |
| BOD1L     | 0.0002 |
| ODZ4      | 0.0002 |
| KCP       | 0.0002 |
| RPS6      | 0.0002 |
| ANP32D    | 0.0002 |
| MAST2     | 0.0002 |
| PTCH1     | 0.0002 |
| CCL27     | 0.0002 |
| MRPL43    | 0.0002 |
| C9orf9    | 0.0002 |
| LOC286161 | 0.0002 |
| PLEKHH3   | 0.0002 |
| AIPL1     | 0.0002 |
| FLJ21369  | 0.0002 |
| ZNF76     | 0.0002 |
| TPTE2P6   | 0.0002 |
| HR        | 0.0002 |
| FGG       | 0.0002 |
| LOC729887 | 0.0002 |
| KRT81     | 0.0002 |
| MMP21     | 0.0002 |
| MADD      | 0.0002 |
| TMEM39B   | 0.0002 |
| CAPN14    | 0.0002 |
| TPST2     | 0.0002 |
| MT1G      | 0.0002 |
| FTSJD1    | 0.0002 |
| C15orf40  | 0.0002 |
| SP140L    | 0.0002 |
| GLYCAM1   | 0.0002 |
| KCNC4     | 0.0002 |
| EMP1      | 0.0002 |
| DDX25     | 0.0002 |



|              |        |
|--------------|--------|
| FTSJ1        | 0.0002 |
| LOC154822    | 0.0002 |
| UCK2         | 0.0002 |
| ZNF543       | 0.0002 |
| STX18        | 0.0002 |
| LOC728537    | 0.0002 |
| BSDC1        | 0.0002 |
| C12orf59     | 0.0002 |
| ARF3         | 0.0002 |
| TEX13B       | 0.0002 |
| SLC9A7       | 0.0002 |
| CTSZ         | 0.0002 |
| CYP4F2       | 0.0002 |
| PCDHGC3      | 0.0002 |
| LOC100288144 | 0.0002 |
| PCDHB6       | 0.0002 |
| TMEM192      | 0.0002 |
| C2orf15      | 0.0002 |
| NASP         | 0.0002 |
| ATP5C1       | 0.0002 |
| ACSS3        | 0.0002 |
| ZNF71        | 0.0002 |
| CALR         | 0.0002 |
| SCLY         | 0.0002 |
| DBIL5P2      | 0.0002 |
| HSPA9        | 0.0002 |
| PDZD11       | 0.0002 |
| SMAD1        | 0.0002 |
| BMPR1A       | 0.0002 |
| C4orf34      | 0.0002 |
| PPP3CA       | 0.0002 |
| SPCS3        | 0.0002 |
| ZNF223       | 0.0002 |
| IRF2BP1      | 0.0002 |
| RPS4X        | 0.0002 |
| FLJ45445     | 0.0002 |
| GYPE         | 0.0002 |
| LOC642838    | 0.0002 |
| LOC146880    | 0.0002 |
| JTB          | 0.0002 |
| OR2T8        | 0.0002 |
| EFNA5        | 0.0002 |
| CPEB3        | 0.0002 |
| WISP1        | 0.0002 |
| RPL32P3      | 0.0002 |
| MAGEH1       | 0.0002 |

|              |        |
|--------------|--------|
| ROCK2        | 0.0002 |
| WDR26        | 0.0002 |
| EFNB1        | 0.0002 |
| LRTM1        | 0.0002 |
| ZNF608       | 0.0002 |
| GRINA        | 0.0002 |
| ZFP36L2      | 0.0002 |
| MAP4K1       | 0.0002 |
| GPR68        | 0.0002 |
| SELV         | 0.0002 |
| ALDH8A1      | 0.0002 |
| LOC440894    | 0.0002 |
| CHAF1A       | 0.0002 |
| DDN          | 0.0002 |
| ZNF576       | 0.0002 |
| MKKS         | 0.0002 |
| ZSCAN18      | 0.0002 |
| CASC4        | 0.0002 |
| LOC100128816 | 0.0002 |
| CPPED1       | 0.0002 |
| ZNF202       | 0.0002 |
| BTBD10       | 0.0002 |
| KCNE2        | 0.0002 |
| SPOCK3       | 0.0002 |
| STON2        | 0.0002 |
| SLAMF9       | 0.0002 |
| FAM175B      | 0.0002 |
| NCKAP1L      | 0.0002 |
| LOC100506159 | 0.0002 |
| TAP2         | 0.0002 |
| XPO4         | 0.0002 |
| UCN2         | 0.0002 |
| PCOLCE       | 0.0002 |
| MXD1         | 0.0002 |
| ISX          | 0.0002 |
| PBOV1        | 0.0002 |
| LOC100289090 | 0.0002 |
| HSD3B7       | 0.0002 |
| AFTPH        | 0.0002 |
| SPP1         | 0.0002 |
| LINC00324    | 0.0002 |
| ADIG         | 0.0002 |
| LOC100132790 | 0.0002 |
| APOBEC3G     | 0.0002 |
| LOC415056    | 0.0002 |
| INPP5B       | 0.0002 |

|              |        |
|--------------|--------|
| ALG1L        | 0.0002 |
| ESPN         | 0.0002 |
| CHST12       | 0.0002 |
| ST7L         | 0.0002 |
| TCF21        | 0.0002 |
| CXorf57      | 0.0002 |
| PLS3         | 0.0002 |
| SULT1A1      | 0.0002 |
| CWF19L2      | 0.0002 |
| CAPN5        | 0.0002 |
| LOC399900    | 0.0002 |
| SH3BGR       | 0.0002 |
| AIMP2        | 0.0002 |
| CCDC78       | 0.0002 |
| DHDH         | 0.0002 |
| MAGED2       | 0.0002 |
| UCHL3        | 0.0002 |
| WDFY3-AS2    | 0.0002 |
| TRIM15       | 0.0002 |
| KDM1A        | 0.0002 |
| REG3A        | 0.0002 |
| FMOD         | 0.0002 |
| LINC00307    | 0.0002 |
| MOXD1        | 0.0002 |
| CDON         | 0.0002 |
| PRSS53       | 0.0002 |
| GMIP         | 0.0002 |
| POMZP3       | 0.0002 |
| KIAA1274     | 0.0002 |
| C20orf197    | 0.0002 |
| LOC100506389 | 0.0002 |
| E2F5         | 0.0002 |
| CCL22        | 0.0002 |
| DNAJC5G      | 0.0002 |
| CEP152       | 0.0002 |
| SCAF4        | 0.0002 |
| PAGE1        | 0.0002 |
| SMR3B        | 0.0002 |
| TSSK1B       | 0.0002 |
| MB           | 0.0002 |
| HOXA11       | 0.0002 |
| C17orf48     | 0.0002 |
| CDR2L        | 0.0002 |
| MEX3D        | 0.0002 |
| C11orf96     | 0.0002 |
| LMF1         | 0.0002 |

|              |        |
|--------------|--------|
| ZNF259       | 0.0002 |
| TMEM116      | 0.0002 |
| RASGRP2      | 0.0002 |
| ASCC1        | 0.0002 |
| PSAPL1       | 0.0002 |
| SCN8A        | 0.0002 |
| DNAH12       | 0.0002 |
| DPPA5        | 0.0002 |
| NAP1L3       | 0.0002 |
| HERC3        | 0.0002 |
| APLF         | 0.0002 |
| ARSE         | 0.0002 |
| LOC100129312 | 0.0002 |
| MB21D2       | 0.0002 |
| ACTRT1       | 0.0002 |
| KRTAP11-1    | 0.0002 |
| DLX3         | 0.0002 |
| YWHAE        | 0.0002 |
| FKBP7        | 0.0002 |
| ACP6         | 0.0002 |
| SPATA19      | 0.0002 |
| RAB1A        | 0.0002 |
| DNTTIP1      | 0.0002 |
| MYO7A        | 0.0002 |
| NF1          | 0.0002 |
| FLYWCH2      | 0.0002 |
| EML4         | 0.0002 |
| GDF2         | 0.0002 |
| CD34         | 0.0002 |
| ZNHIT2       | 0.0002 |
| HPS1         | 0.0002 |
| IBTK         | 0.0002 |
| LOC728543    | 0.0002 |
| LOC100507415 | 0.0002 |
| KIAA1468     | 0.0002 |
| RAET1K       | 0.0002 |
| KLF6         | 0.0002 |
| ARL10        | 0.0002 |
| RPL8         | 0.0002 |
| PRKAG2       | 0.0002 |
| ANTXR2       | 0.0002 |
| TMEM175      | 0.0002 |
| PTPRU        | 0.0002 |
| GRPR         | 0.0002 |
| SNX8         | 0.0002 |
| AHCYL2       | 0.0002 |

|           |        |
|-----------|--------|
| PDE12     | 0.0002 |
| EHMT2     | 0.0002 |
| C19orf79  | 0.0002 |
| S100A1    | 0.0002 |
| OR1F2P    | 0.0002 |
| SLC5A3    | 0.0002 |
| CCDC28B   | 0.0002 |
| ZDHHC20   | 0.0002 |
| PHACTR4   | 0.0002 |
| SDHA      | 0.0002 |
| IGSF9     | 0.0002 |
| TNIP1     | 0.0002 |
| RUFY1     | 0.0002 |
| DSCR4     | 0.0002 |
| DDX39A    | 0.0002 |
| DDR2      | 0.0002 |
| SHROOM1   | 0.0002 |
| PRSS42    | 0.0002 |
| KIAA0247  | 0.0002 |
| GJD2      | 0.0002 |
| EEF1A2    | 0.0002 |
| MS4A8B    | 0.0002 |
| SAA1      | 0.0002 |
| ALKBH3    | 0.0002 |
| COQ4      | 0.0002 |
| CKAP5     | 0.0002 |
| LOC388387 | 0.0002 |
| TERF2IP   | 0.0002 |
| CYP1A2    | 0.0002 |
| WAC       | 0.0002 |
| REM2      | 0.0002 |
| ZNF549    | 0.0002 |
| LINC00478 | 0.0002 |
| NCOR2     | 0.0002 |
| NRL       | 0.0002 |
| FOLH1B    | 0.0002 |
| GAPDH     | 0.0002 |
| HSPA5     | 0.0002 |
| PRMT5     | 0.0002 |
| AKAP4     | 0.0002 |
| B4GALNT2  | 0.0002 |
| MED26     | 0.0002 |
| LAMP2     | 0.0002 |
| COPE      | 0.0002 |
| TTLL11    | 0.0002 |
| PCDHGA5   | 0.0002 |

|           |        |
|-----------|--------|
| TEX13A    | 0.0002 |
| TBX6      | 0.0002 |
| RNF125    | 0.0002 |
| C4orf46   | 0.0002 |
| ANKFY1    | 0.0002 |
| PPP1R16B  | 0.0002 |
| NNT       | 0.0002 |
| GLRX5     | 0.0002 |
| CDK16     | 0.0002 |
| TRGV7     | 0.0002 |
| SUPT7L    | 0.0002 |
| PTPRH     | 0.0002 |
| FAM86FP   | 0.0002 |
| TNFRSF17  | 0.0002 |
| RPGRIP1   | 0.0002 |
| IKZF4     | 0.0002 |
| MYO7B     | 0.0002 |
| PRSS2     | 0.0002 |
| GPRC5B    | 0.0002 |
| CHST10    | 0.0002 |
| SMARCD2   | 0.0002 |
| SPA17     | 0.0002 |
| SLC4A10   | 0.0002 |
| TCTEX1D1  | 0.0002 |
| CCDC15    | 0.0002 |
| LOC730961 | 0.0002 |
| G6PC2     | 0.0002 |
| FAM81A    | 0.0002 |
| FAM76A    | 0.0002 |
| SPATA24   | 0.0002 |
| GLDC      | 0.0002 |
| SYT7      | 0.0002 |
| OR10A4    | 0.0002 |
| TMEM104   | 0.0002 |
| COL9A1    | 0.0002 |
| CHRD1     | 0.0002 |
| FYN       | 0.0002 |
| GATAD2A   | 0.0002 |
| WSB1      | 0.0002 |
| ABHD4     | 0.0002 |
| ZNF513    | 0.0002 |
| IFI44     | 0.0002 |
| SRGAP2P1  | 0.0002 |
| NUDC      | 0.0002 |
| PPARG     | 0.0002 |
| PHLPP1    | 0.0002 |

|              |        |
|--------------|--------|
| MMD2         | 0.0002 |
| USP53        | 0.0002 |
| BMI1         | 0.0002 |
| PTPN23       | 0.0002 |
| RRAS2        | 0.0002 |
| FAM127A      | 0.0002 |
| E2F4         | 0.0002 |
| IFT46        | 0.0002 |
| LOC100507039 | 0.0002 |
| PWP2         | 0.0002 |
| FAM43B       | 0.0002 |
| C8A          | 0.0002 |
| ZNF497       | 0.0002 |
| P4HB         | 0.0002 |
| VEGFC        | 0.0002 |
| SSU72        | 0.0002 |
| NOL10        | 0.0002 |
| TES          | 0.0002 |
| BLNK         | 0.0002 |
| IQCA1        | 0.0002 |
| PIK3IP1      | 0.0002 |
| DEXI         | 0.0002 |
| NR4A2        | 0.0002 |
| BAG6         | 0.0002 |
| LYAR         | 0.0002 |
| TJP3         | 0.0002 |
| HP1BP3       | 0.0002 |
| LOC100131053 | 0.0002 |
| HINT2        | 0.0002 |
| FOXK2        | 0.0002 |
| HYI          | 0.0002 |
| ZNF234       | 0.0002 |
| VCPIP1       | 0.0002 |
| UGT8         | 0.0002 |
| API5         | 0.0002 |
| FARP1        | 0.0002 |
| HLA-F        | 0.0002 |
| ZNF777       | 0.0002 |
| SIRT7        | 0.0002 |
| FGF5         | 0.0002 |
| NACC2        | 0.0002 |
| PSPC1        | 0.0002 |
| FZD9         | 0.0002 |
| DHRS1        | 0.0002 |
| MRPL30       | 0.0002 |
| SLC28A1      | 0.0002 |

|              |        |
|--------------|--------|
| NOS1AP       | 0.0002 |
| PMCHL1       | 0.0002 |
| C22orf39     | 0.0002 |
| XBP1         | 0.0002 |
| TNFRSF1B     | 0.0002 |
| POU6F1       | 0.0002 |
| APH1A        | 0.0002 |
| TLE1         | 0.0002 |
| BBX          | 0.0002 |
| LOC153811    | 0.0002 |
| AK4          | 0.0002 |
| CLDN17       | 0.0002 |
| LOC100132831 | 0.0002 |
| MDP1         | 0.0002 |
| LOC550643    | 0.0002 |
| ASAP3        | 0.0002 |
| RPS6KA6      | 0.0002 |
| LIPG         | 0.0002 |
| RFC1         | 0.0002 |
| SPARCL1      | 0.0002 |
| POLDIP3      | 0.0002 |
| ZHX2         | 0.0002 |
| PNPO         | 0.0002 |
| DOK1         | 0.0002 |
| GPATCH2      | 0.0002 |
| CASZ1        | 0.0002 |
| SCML4        | 0.0002 |
| WDR43        | 0.0002 |
| OR1D5        | 0.0002 |
| EPGN         | 0.0002 |
| MED6         | 0.0002 |
| OR2B6        | 0.0002 |
| TDP1         | 0.0002 |
| SH2D4B       | 0.0002 |
| TUFM         | 0.0002 |
| FAM49B       | 0.0002 |
| SCAMP5       | 0.0002 |
| ASAH2        | 0.0002 |
| RMND1        | 0.0002 |
| C4orf42      | 0.0002 |
| TMED9        | 0.0002 |
| ZNF525       | 0.0002 |
| PPP1R14B     | 0.0002 |
| SLC35A2      | 0.0002 |
| C15orf37     | 0.0002 |
| TMEM176A     | 0.0002 |



|           |        |
|-----------|--------|
| CERS6     | 0.0002 |
| IL17RB    | 0.0002 |
| CDC20     | 0.0002 |
| MAD1L1    | 0.0002 |
| ZNF140    | 0.0002 |
| NOSIP     | 0.0002 |
| KIAA2022  | 0.0002 |
| ANKZF1    | 0.0002 |
| BTAF1     | 0.0002 |
| LOC400084 | 0.0002 |
| ADAM28    | 0.0002 |
| ACVR2A    | 0.0002 |
| NANOS1    | 0.0002 |
| GPRASP1   | 0.0002 |
| PHKG1     | 0.0002 |
| C1orf177  | 0.0002 |
| C6orf89   | 0.0002 |
| SLC44A5   | 0.0002 |
| SLC8A3    | 0.0002 |
| WNT10B    | 0.0002 |
| MANEA     | 0.0002 |
| UBE2G1    | 0.0002 |
| ETV5      | 0.0002 |
| PRKCG     | 0.0002 |
| WHAMM     | 0.0002 |
| C4orf49   | 0.0002 |
| SEC22C    | 0.0002 |
| ANO7      | 0.0002 |
| SNAPC3    | 0.0002 |
| DAP       | 0.0002 |
| CGRRF1    | 0.0002 |
| WIP1      | 0.0002 |
| CHMP2A    | 0.0002 |
| SAMD9     | 0.0002 |
| WDR44     | 0.0002 |
| PCYT1A    | 0.0002 |
| ALOX12    | 0.0002 |
| MMP16     | 0.0002 |
| SLC9A1    | 0.0002 |
| CSH2      | 0.0002 |
| CCDC3     | 0.0002 |
| C15orf48  | 0.0002 |
| GCC1      | 0.0002 |
| MGC12916  | 0.0002 |
| CEACAM4   | 0.0002 |
| PF4V1     | 0.0002 |

|                 |        |
|-----------------|--------|
| CYP11B2         | 0.0002 |
| CCDC68          | 0.0002 |
| ART3            | 0.0002 |
| AZU1            | 0.0002 |
| CLCC1           | 0.0002 |
| PDDC1           | 0.0002 |
| CCBE1           | 0.0002 |
| ADPRHL1         | 0.0002 |
| ASF1A           | 0.0002 |
| PRPS1           | 0.0002 |
| GJB7            | 0.0002 |
| LIMS3-LOC440895 | 0.0002 |
| LOC100506123    | 0.0002 |
| PMVK            | 0.0002 |
| CALML5          | 0.0002 |
| FASTK           | 0.0002 |
| ATP1A4          | 0.0002 |
| TTY5            | 0.0002 |
| TPI1            | 0.0002 |
| PGM5            | 0.0002 |
| HEATR5A         | 0.0002 |
| KIAA2026        | 0.0002 |
| RNPEPL1         | 0.0002 |
| LACC1           | 0.0002 |
| HIST1H2AE       | 0.0002 |
| CA5B            | 0.0002 |
| ZIM2            | 0.0002 |
| ZNF486          | 0.0002 |
| SF3A3           | 0.0002 |
| GALK1           | 0.0002 |
| SLMO1           | 0.0002 |
| PRCP            | 0.0002 |
| GOPC            | 0.0002 |
| TTC39B          | 0.0002 |
| PPP1R7          | 0.0002 |
| CDH22           | 0.0002 |
| SLC46A1         | 0.0002 |
| C1orf173        | 0.0002 |
| UTRN            | 0.0002 |
| C6orf124        | 0.0002 |
| DEFA6           | 0.0002 |
| POLM            | 0.0002 |
| NUCB2           | 0.0002 |
| C1orf106        | 0.0002 |
| PMPCA           | 0.0002 |
| ZMYM4           | 0.0002 |

|              |        |
|--------------|--------|
| MYL1         | 0.0002 |
| TMEM179B     | 0.0002 |
| CCDC120      | 0.0002 |
| ZNF354A      | 0.0002 |
| TNAP         | 0.0002 |
| TJP1         | 0.0002 |
| OSBPL1A      | 0.0002 |
| HHATL        | 0.0002 |
| ATG14        | 0.0002 |
| DNAH11       | 0.0002 |
| MS4A12       | 0.0002 |
| TTI1         | 0.0002 |
| ZBTB20-AS1   | 0.0002 |
| ZNF167       | 0.0002 |
| C10orf58     | 0.0002 |
| FRMD5        | 0.0002 |
| HOOK2        | 0.0002 |
| ADRA2B       | 0.0002 |
| MCHR2        | 0.0002 |
| DSE          | 0.0002 |
| TNFRSF21     | 0.0002 |
| ITGAL        | 0.0002 |
| CD22         | 0.0002 |
| MRPS17       | 0.0002 |
| ANGPTL3      | 0.0002 |
| RBM4B        | 0.0002 |
| GCGR         | 0.0002 |
| MEF2BNB      | 0.0002 |
| LOC100129476 | 0.0002 |
| BAK1         | 0.0002 |
| GNL3L        | 0.0002 |
| RNF7         | 0.0002 |
| C4orf6       | 0.0002 |
| ATXN10       | 0.0002 |
| C17orf79     | 0.0002 |
| LOC100507117 | 0.0002 |
| SETMAR       | 0.0002 |
| L3MBTL3      | 0.0002 |
| LAMC1        | 0.0002 |
| CSN1S2AP     | 0.0002 |
| CNTD2        | 0.0002 |
| MMS22L       | 0.0002 |
| SRSF12       | 0.0002 |
| LCK          | 0.0002 |
| INTS1        | 0.0002 |
| GGT8P        | 0.0002 |

|              |        |
|--------------|--------|
| RGS2         | 0.0002 |
| ZNF358       | 0.0002 |
| PPFIBP1      | 0.0002 |
| C17orf77     | 0.0002 |
| CABP5        | 0.0002 |
| SNX13        | 0.0002 |
| ACCN2        | 0.0002 |
| LOC100507458 | 0.0002 |
| FOXD4        | 0.0002 |
| ISL2         | 0.0002 |
| C8orf84      | 0.0002 |
| RNF185       | 0.0002 |
| CYP46A1      | 0.0002 |
| C12orf43     | 0.0002 |
| INTS9        | 0.0002 |
| TEX2         | 0.0002 |
| PGD          | 0.0002 |
| LAP3         | 0.0002 |
| CACNA1C      | 0.0002 |
| CTAG2        | 0.0002 |
| PSMD14       | 0.0002 |
| TBX1         | 0.0002 |
| DPEP1        | 0.0002 |
| CLEC11A      | 0.0002 |
| C3orf64      | 0.0002 |
| NAG18        | 0.0002 |
| GDPD1        | 0.0002 |
| STAG2        | 0.0002 |
| GUF1         | 0.0002 |
| MGC39372     | 0.0002 |
| SMEK3P       | 0.0002 |
| CDADC1       | 0.0002 |
| SLC7A9       | 0.0002 |
| C8orf73      | 0.0002 |
| GGN          | 0.0002 |
| OR7D2        | 0.0002 |
| SIX3         | 0.0002 |
| TXNL4B       | 0.0002 |
| MYH7B        | 0.0002 |
| TMEM106C     | 0.0002 |
| LYPD1        | 0.0002 |
| NPFFR1       | 0.0002 |
| LRRC4B       | 0.0002 |
| FAM113A      | 0.0002 |
| ADCY8        | 0.0002 |
| PTH2R        | 0.0002 |

|           |        |
|-----------|--------|
| RP9P      | 0.0002 |
| ARFGAP3   | 0.0002 |
| AOAH      | 0.0002 |
| CSNK1E    | 0.0002 |
| RGS14     | 0.0002 |
| ZSWIM5    | 0.0002 |
| PAQR9     | 0.0002 |
| PHACTR3   | 0.0002 |
| C1orf172  | 0.0002 |
| SOCS1     | 0.0002 |
| SPSB1     | 0.0002 |
| RPRM      | 0.0002 |
| SRGAP3    | 0.0002 |
| ANGPTL5   | 0.0002 |
| GNPDA2    | 0.0002 |
| HDX       | 0.0002 |
| SLIRP     | 0.0002 |
| COA5      | 0.0002 |
| HGS       | 0.0002 |
| MKRN1     | 0.0002 |
| SYF2      | 0.0002 |
| CSTL1     | 0.0002 |
| LOC344967 | 0.0002 |
| PTPN1     | 0.0002 |
| MGP       | 0.0002 |
| BOC       | 0.0002 |
| PRKD2     | 0.0002 |
| GSTZ1     | 0.0002 |
| RGS20     | 0.0002 |
| PALB2     | 0.0002 |
| SPATA2L   | 0.0002 |
| WBSCR22   | 0.0002 |
| LINC00402 | 0.0002 |
| SLC13A3   | 0.0002 |
| BTC       | 0.0002 |
| ZNF165    | 0.0002 |
| CASD1     | 0.0002 |
| KIF1A     | 0.0002 |
| KRT17     | 0.0002 |
| CNIH      | 0.0002 |
| ZNF23     | 0.0002 |
| DNAJB8    | 0.0002 |
| OSBPL7    | 0.0002 |
| ATG4C     | 0.0002 |
| GEN1      | 0.0002 |
| RHOB      | 0.0002 |

|              |        |
|--------------|--------|
| TREX1        | 0.0002 |
| ZNRF2P1      | 0.0002 |
| SLC10A1      | 0.0002 |
| ENGASE       | 0.0002 |
| SLAMF6       | 0.0002 |
| SDCCAG8      | 0.0002 |
| STAMBP       | 0.0002 |
| LOC100129463 | 0.0002 |
| ARVP6125     | 0.0002 |
| C22orf23     | 0.0002 |
| JKAMP        | 0.0002 |
| MYO15B       | 0.0002 |
| EIF3B        | 0.0002 |
| LINC00277    | 0.0002 |
| DCLK1        | 0.0002 |
| DHFRL1       | 0.0002 |
| C14orf93     | 0.0002 |
| TSR1         | 0.0002 |
| TRIM13       | 0.0002 |
| CAPNS2       | 0.0002 |
| GAGE7        | 0.0002 |
| IMP3         | 0.0002 |
| PDP2         | 0.0002 |
| PKD2L2       | 0.0002 |
| SPNS2        | 0.0002 |
| SRRM2        | 0.0002 |
| ATP6V0D1     | 0.0002 |
| C14orf126    | 0.0002 |
| KIAA1919     | 0.0002 |
| SDF2L1       | 0.0002 |
| SERPINI1     | 0.0002 |
| PHLDB3       | 0.0002 |
| LOC100505633 | 0.0002 |
| SLC26A11     | 0.0002 |
| DPP8         | 0.0002 |
| DOK3         | 0.0002 |
| ITIH2        | 0.0002 |
| CSF1         | 0.0002 |
| ALPK2        | 0.0002 |
| KRT34        | 0.0002 |
| HACE1        | 0.0002 |
| PPFIA2       | 0.0002 |
| TALDO1       | 0.0002 |
| ARL17A       | 0.0002 |
| TAS2R7       | 0.0002 |
| ATL2         | 0.0002 |

|              |        |
|--------------|--------|
| CREBZF       | 0.0002 |
| ADIPOQ       | 0.0002 |
| PSENEN       | 0.0002 |
| LOC100506507 | 0.0002 |
| XPNPEP3      | 0.0002 |
| HYAL3        | 0.0002 |
| FRMD4B       | 0.0002 |
| ATG2A        | 0.0002 |
| IL8          | 0.0002 |
| KANK4        | 0.0002 |
| ARPC2        | 0.0002 |
| C2orf67      | 0.0002 |
| WDR46        | 0.0002 |
| LOC497257    | 0.0002 |
| SURF4        | 0.0002 |
| C19orf67     | 0.0002 |
| GLB1L        | 0.0002 |
| FOXD1        | 0.0002 |
| LOC100652849 | 0.0002 |
| SURF1        | 0.0002 |
| SIRT6        | 0.0002 |
| BMP1         | 0.0002 |
| B3GNT8       | 0.0002 |
| PUS7         | 0.0002 |
| GCNT2        | 0.0002 |
| ALDH1A3      | 0.0002 |
| TECPR2       | 0.0002 |
| EBF3         | 0.0002 |
| SLC6A2       | 0.0002 |
| INGX         | 0.0002 |
| KCTD1        | 0.0002 |
| MDS2         | 0.0002 |
| FBLN2        | 0.0002 |
| SDCCAG3      | 0.0002 |
| C8orf68      | 0.0002 |
| C8orf4       | 0.0002 |
| FARP2        | 0.0002 |
| PRSS37       | 0.0002 |
| AMBP         | 0.0002 |
| PAQR8        | 0.0002 |
| SPRY3        | 0.0002 |
| PLXDC2       | 0.0002 |
| TRPM7        | 0.0002 |
| CYTH3        | 0.0002 |
| GRB7         | 0.0002 |
| PANK1        | 0.0002 |

|               |        |
|---------------|--------|
| C11orf52      | 0.0002 |
| ITM2A         | 0.0002 |
| CALM2         | 0.0002 |
| EDF1          | 0.0002 |
| LOC100505483  | 0.0002 |
| AFP           | 0.0002 |
| TMEM60        | 0.0002 |
| FAM189B       | 0.0002 |
| MEF2BNB-MEF2B | 0.0002 |
| RINT1         | 0.0002 |
| LOC100509541  | 0.0002 |
| STRN          | 0.0002 |
| NR1H3         | 0.0002 |
| CDHR3         | 0.0002 |
| MST1P2        | 0.0002 |
| RNF115        | 0.0002 |
| HNRNPA3       | 0.0002 |
| NPPC          | 0.0002 |
| SYDE2         | 0.0002 |
| IGF2          | 0.0002 |
| ASB4          | 0.0002 |
| CD36          | 0.0002 |
| FAM108C1      | 0.0002 |
| RBM26-AS1     | 0.0002 |
| LOC100130078  | 0.0002 |
| ZNF37A        | 0.0002 |
| LGALS7B       | 0.0002 |
| RBBP7         | 0.0002 |
| RNF186        | 0.0002 |
| ACIN1         | 0.0002 |
| ZZEF1         | 0.0002 |
| ATXN7L3B      | 0.0002 |
| HUNK          | 0.0002 |
| GALNTL4       | 0.0002 |
| PLEKHB1       | 0.0002 |
| GRM1          | 0.0002 |
| MIR7-3HG      | 0.0002 |
| LINC00116     | 0.0002 |
| PRICKLE3      | 0.0002 |
| BLVRB         | 0.0002 |
| RRP7A         | 0.0002 |
| EIF1AX        | 0.0002 |
| NUP155        | 0.0002 |
| C15orf29      | 0.0002 |
| NR2E3         | 0.0002 |
| TIMM10        | 0.0002 |



|              |        |
|--------------|--------|
| IL1A         | 0.0002 |
| KIAA1377     | 0.0002 |
| HTR1F        | 0.0002 |
| VSTM2B       | 0.0002 |
| ITGAX        | 0.0002 |
| ZFP36        | 0.0002 |
| IFT27        | 0.0002 |
| CYGB         | 0.0002 |
| LECT1        | 0.0002 |
| NES          | 0.0002 |
| ZGPAT        | 0.0002 |
| YAF2         | 0.0002 |
| TRIM72       | 0.0002 |
| C19orf28     | 0.0002 |
| HSD11B2      | 0.0002 |
| SLC17A4      | 0.0002 |
| ZNF415       | 0.0002 |
| C22orf36     | 0.0002 |
| KCNE4        | 0.0002 |
| CSMD2        | 0.0002 |
| BAALC        | 0.0002 |
| LOC100129034 | 0.0002 |
| ATP5J        | 0.0002 |
| GGA1         | 0.0002 |
| LMF2         | 0.0002 |
| NPHP3        | 0.0002 |
| MAGEA9       | 0.0002 |
| SLC25A33     | 0.0002 |
| NAALADL1     | 0.0002 |
| NQO1         | 0.0002 |
| NTSR1        | 0.0002 |
| C17orf110    | 0.0002 |
| IL2RG        | 0.0002 |
| NBPF15       | 0.0002 |
| ZNF548       | 0.0002 |
| MFSD3        | 0.0002 |
| TPRXL        | 0.0002 |
| ITSN1        | 0.0002 |
| ASTN1        | 0.0002 |
| RAB34        | 0.0002 |
| SLC38A11     | 0.0002 |
| RAP1GAP2     | 0.0002 |
| RPS2         | 0.0002 |
| PRKCA        | 0.0002 |
| DCX          | 0.0002 |
| CHCHD3       | 0.0002 |

|              |        |
|--------------|--------|
| TSPAN4       | 0.0002 |
| CUL4B        | 0.0002 |
| ZNF385A      | 0.0002 |
| ST7-AS1      | 0.0002 |
| 3-Sep        | 0.0002 |
| RCOR3        | 0.0002 |
| ZMAT1        | 0.0002 |
| LOXL3        | 0.0002 |
| NPSA         | 0.0002 |
| TRNP1        | 0.0002 |
| S100A9       | 0.0002 |
| DCAF16       | 0.0002 |
| GLYCTK       | 0.0002 |
| MS4A7        | 0.0002 |
| PXK          | 0.0002 |
| FOXJ1        | 0.0002 |
| LOC100240735 | 0.0002 |
| NDFIP2       | 0.0002 |
| CNTNAP3      | 0.0002 |
| PCDHGB7      | 0.0002 |
| KLF8         | 0.0002 |
| ELOVL6       | 0.0002 |
| EN1          | 0.0002 |
| EHMT1        | 0.0002 |
| CTAGE4       | 0.0002 |
| MT1JP        | 0.0002 |
| TMCO1        | 0.0002 |
| LOC100289079 | 0.0002 |
| UBE2D2       | 0.0002 |
| ELF4         | 0.0002 |
| RNASEK       | 0.0002 |
| CANX         | 0.0002 |
| MTX3         | 0.0002 |
| DSCAML1      | 0.0002 |
| CYBRD1       | 0.0002 |
| VGLL4        | 0.0002 |
| AMPD2        | 0.0002 |
| DCAF10       | 0.0002 |
| CLEC14A      | 0.0002 |
| PJA1         | 0.0002 |
| S100B        | 0.0002 |
| C21orf30     | 0.0002 |
| C9orf125     | 0.0002 |
| BCAP29       | 0.0002 |
| CDC5L        | 0.0002 |
| DEFB129      | 0.0002 |

|           |        |
|-----------|--------|
| TMEM59    | 0.0002 |
| PWWP2B    | 0.0002 |
| JMJD8     | 0.0002 |
| SELO      | 0.0002 |
| RRP1      | 0.0002 |
| EIF4EBP2  | 0.0002 |
| MED11     | 0.0002 |
| TMEM184C  | 0.0002 |
| APBA3     | 0.0002 |
| FLII      | 0.0002 |
| TYW5      | 0.0002 |
| TMC1      | 0.0002 |
| HEYL      | 0.0002 |
| YPEL5     | 0.0002 |
| PLK4      | 0.0002 |
| CES4A     | 0.0002 |
| MMP9      | 0.0002 |
| CABP7     | 0.0002 |
| PCDH17    | 0.0002 |
| VRK3      | 0.0002 |
| AK1       | 0.0002 |
| LOC389641 | 0.0002 |
| CAP2      | 0.0002 |
| CABP4     | 0.0002 |
| ANP32B    | 0.0002 |
| SYNGAP1   | 0.0002 |
| SH2D6     | 0.0002 |
| LRRC34    | 0.0002 |
| C8orf76   | 0.0002 |
| ARRDC2    | 0.0002 |
| CCDC62    | 0.0002 |
| C8orf37   | 0.0002 |
| EFTUD1    | 0.0002 |
| SERINC1   | 0.0002 |
| PICALM    | 0.0002 |
| TMEM132B  | 0.0002 |
| FAM7A1    | 0.0002 |
| GPR88     | 0.0002 |
| GSTM2     | 0.0002 |
| C5orf15   | 0.0002 |
| LINC00315 | 0.0002 |
| OMD       | 0.0002 |
| STAC2     | 0.0002 |
| CLDN9     | 0.0002 |
| NDUFA9    | 0.0002 |
| RNF14     | 0.0002 |

|          |        |
|----------|--------|
| HNRNPCL1 | 0.0002 |
| KCNA1    | 0.0002 |
| HTR3D    | 0.0002 |
| MIIP     | 0.0002 |
| GFPT2    | 0.0002 |
| ASL      | 0.0002 |
| ZNF217   | 0.0002 |
| SNX33    | 0.0002 |
| CHRNA9   | 0.0002 |
| OR1L4    | 0.0002 |
| PLEKHM1  | 0.0002 |
| HOXD10   | 0.0002 |
| RAD51D   | 0.0002 |
| TBR1     | 0.0002 |
| GOLGA4   | 0.0002 |
| HIVEP1   | 0.0002 |
| CHD9     | 0.0002 |
| TKT      | 0.0002 |
| RPP40    | 0.0002 |
| TNNC1    | 0.0002 |
| APOBEC1  | 0.0002 |
| CCBL2    | 0.0002 |
| ICAM5    | 0.0002 |
| GGNBP2   | 0.0002 |
| C16orf89 | 0.0002 |
| AICDA    | 0.0002 |
| CCDC126  | 0.0002 |
| ZDHHC2   | 0.0002 |
| MICAL2   | 0.0002 |
| DPF2     | 0.0002 |
| CITED4   | 0.0002 |
| XAGE3    | 0.0002 |
| NR1I2    | 0.0002 |
| HIST4H4  | 0.0002 |
| KCNH2    | 0.0002 |
| ZC3H10   | 0.0002 |
| YBEY     | 0.0002 |
| CCDC102A | 0.0002 |
| H2BFXP   | 0.0002 |
| PNPLA3   | 0.0002 |
| A4GALT   | 0.0002 |
| C3orf26  | 0.0002 |
| CDC25A   | 0.0002 |
| USP49    | 0.0002 |
| ZNF841   | 0.0002 |
| EBPL     | 0.0002 |

|           |        |
|-----------|--------|
| ART5      | 0.0002 |
| SLC9A2    | 0.0002 |
| EXOSC10   | 0.0002 |
| MRPS33    | 0.0002 |
| XYLT1     | 0.0002 |
| CXCL5     | 0.0002 |
| BHLHE22   | 0.0002 |
| LOC283481 | 0.0002 |
| C9orf131  | 0.0002 |
| SLMO2     | 0.0002 |
| ID4       | 0.0002 |
| NSUN4     | 0.0002 |
| PNMAL1    | 0.0002 |
| PCDH19    | 0.0002 |
| TMPRSS3   | 0.0002 |
| PEX11A    | 0.0002 |
| PFDN4     | 0.0002 |
| DCLRE1B   | 0.0002 |
| SNRPG     | 0.0002 |
| P2RX7     | 0.0002 |
| SLC16A8   | 0.0002 |
| DNAJA3    | 0.0002 |
| MAFA      | 0.0002 |
| NAT8      | 0.0002 |
| RARG      | 0.0002 |
| BAG5      | 0.0002 |
| SERPINA12 | 0.0002 |
| ANKRD13D  | 0.0002 |
| C1orf115  | 0.0002 |
| SLC14A2   | 0.0002 |
| ZDHHC12   | 0.0002 |
| POLR3K    | 0.0002 |
| PEX26     | 0.0002 |
| MTRR      | 0.0002 |
| POMGNT1   | 0.0002 |
| SPDYA     | 0.0002 |
| NDUFC1    | 0.0002 |
| MAP4K5    | 0.0002 |
| NCAN      | 0.0002 |
| NUPR1     | 0.0002 |
| RPL21P44  | 0.0002 |
| AVP       | 0.0002 |
| C13orf41  | 0.0002 |
| ZNF684    | 0.0002 |
| AMELY     | 0.0002 |
| FKSG83    | 0.0002 |

|              |        |
|--------------|--------|
| RBM34        | 0.0002 |
| TUFT1        | 0.0002 |
| LGALS8-AS1   | 0.0002 |
| DEFB127      | 0.0002 |
| HIRIP3       | 0.0002 |
| NEURL4       | 0.0002 |
| CNNM2        | 0.0002 |
| TTC30B       | 0.0002 |
| SUSD4        | 0.0002 |
| PRDM5        | 0.0002 |
| MGC24103     | 0.0002 |
| FOSL1        | 0.0002 |
| HIGD2A       | 0.0002 |
| LOC158572    | 0.0002 |
| TMEM150C     | 0.0002 |
| POLR2J2      | 0.0002 |
| RNF111       | 0.0002 |
| MLX          | 0.0002 |
| EHD1         | 0.0002 |
| DMC1         | 0.0002 |
| FBXO24       | 0.0002 |
| RGMA         | 0.0002 |
| BCL3         | 0.0002 |
| LOC100132247 | 0.0002 |
| LOC100147773 | 0.0002 |
| LOC729603    | 0.0002 |
| EPB42        | 0.0002 |
| SLC6A4       | 0.0002 |
| GTF3C2       | 0.0002 |
| PHF12        | 0.0002 |
| HN1L         | 0.0002 |
| CCDC11       | 0.0002 |
| KRTAP9-9     | 0.0002 |
| C7orf64      | 0.0002 |
| SIGLEC9      | 0.0002 |
| TMEM31       | 0.0002 |
| PLEKHF1      | 0.0002 |
| NDUFB5       | 0.0002 |
| FUT7         | 0.0002 |
| GBP4         | 0.0002 |
| SDCBP2       | 0.0002 |
| CYTH2        | 0.0002 |
| ST6GALNAC2   | 0.0002 |
| LAIR2        | 0.0002 |
| DNAJC12      | 0.0002 |
| PTPMT1       | 0.0002 |

|              |        |
|--------------|--------|
| CCNB1IP1     | 0.0002 |
| HOXD8        | 0.0002 |
| NAT2         | 0.0002 |
| CEP135       | 0.0002 |
| CADPS        | 0.0002 |
| NDUFA7       | 0.0002 |
| TNFRSF14     | 0.0002 |
| C10orf114    | 0.0002 |
| SPINT1       | 0.0002 |
| KRT85        | 0.0002 |
| DYNC1I2      | 0.0002 |
| LOC100507380 | 0.0002 |
| MS4A2        | 0.0002 |
| USP37        | 0.0002 |
| CCT6A        | 0.0002 |
| ZNF615       | 0.0002 |
| CPN1         | 0.0002 |
| C11orf10     | 0.0002 |
| C7orf42      | 0.0002 |
| LRP12        | 0.0002 |
| DOC2A        | 0.0002 |
| ABCB9        | 0.0002 |
| MGC14436     | 0.0002 |
| DOCK1        | 0.0002 |
| ELMOD3       | 0.0002 |
| GLS          | 0.0002 |
| IFRD2        | 0.0002 |
| FMNL3        | 0.0002 |
| THADA        | 0.0002 |
| ASCC3        | 0.0002 |
| THSD4        | 0.0002 |
| C1orf150     | 0.0002 |
| RBBP6        | 0.0002 |
| GSTK1        | 0.0002 |
| SENP6        | 0.0002 |
| LOC100507588 | 0.0002 |
| MVD          | 0.0002 |
| ADRA2A       | 0.0002 |
| NEBL         | 0.0002 |
| FUT11        | 0.0002 |
| S100Z        | 0.0002 |
| C2orf74      | 0.0002 |
| ABHD8        | 0.0002 |
| HAUS7        | 0.0002 |
| GYG1         | 0.0002 |
| LOC100509121 | 0.0002 |

|              |        |
|--------------|--------|
| RAPGEF4      | 0.0002 |
| CCR2         | 0.0002 |
| LOC645752    | 0.0002 |
| CD14         | 0.0002 |
| CFHR1        | 0.0002 |
| SAMD15       | 0.0002 |
| CACNA1G      | 0.0002 |
| SETD3        | 0.0002 |
| ARHGAP28     | 0.0002 |
| HSPA14       | 0.0002 |
| PTRH1        | 0.0002 |
| SLC22A18     | 0.0002 |
| DRD3         | 0.0002 |
| SLC35B3      | 0.0002 |
| CHST4        | 0.0002 |
| LOC649294    | 0.0002 |
| SRRD         | 0.0002 |
| ZBTB22       | 0.0002 |
| GJB3         | 0.0002 |
| TOMM40       | 0.0002 |
| RNF183       | 0.0002 |
| CCDC150      | 0.0002 |
| FAM70A       | 0.0002 |
| LOC100505784 | 0.0002 |
| CNGA1        | 0.0002 |
| H3F3C        | 0.0002 |
| PAPOLB       | 0.0002 |
| TOR2A        | 0.0002 |
| OOEP         | 0.0002 |
| C15orf63     | 0.0002 |
| ADORA1       | 0.0002 |
| LEPR         | 0.0002 |
| KAT7         | 0.0002 |
| C7orf73      | 0.0002 |
| ISM2         | 0.0002 |
| C5orf30      | 0.0002 |
| ALKBH5       | 0.0002 |
| TAC1         | 0.0002 |
| CARKD        | 0.0002 |
| EZH2         | 0.0002 |
| RB1          | 0.0002 |
| LOC100132356 | 0.0002 |
| MIR31HG      | 0.0002 |
| LOC100653030 | 0.0002 |
| LMO7         | 0.0002 |
| AKIRIN1      | 0.0002 |



|              |        |
|--------------|--------|
| NTN1         | 0.0002 |
| IGLL1        | 0.0002 |
| TAGLN3       | 0.0002 |
| SLCO4A1      | 0.0002 |
| CYP2F1       | 0.0002 |
| FBXW8        | 0.0002 |
| FAM75C2      | 0.0002 |
| RIMKLA       | 0.0002 |
| RIIAD1       | 0.0002 |
| LOC100505876 | 0.0002 |
| OR4X2        | 0.0002 |
| TRIM62       | 0.0002 |
| JMJD6        | 0.0002 |
| TANC2        | 0.0002 |
| NONO         | 0.0002 |
| EMR3         | 0.0002 |
| CCNY         | 0.0002 |
| DMXL2        | 0.0002 |
| XPR1         | 0.0002 |
| TPM3         | 0.0002 |
| ABCA5        | 0.0002 |
| IL27RA       | 0.0002 |
| NAA25        | 0.0002 |
| FLJ31715     | 0.0002 |
| SIGLEC12     | 0.0002 |
| RHBDD3       | 0.0002 |
| SPTSSB       | 0.0002 |
| C6orf146     | 0.0002 |
| PRPSAP1      | 0.0002 |
| LOC731789    | 0.0002 |
| KRT222       | 0.0002 |
| THNSL1       | 0.0002 |
| PTHLH        | 0.0002 |
| ZNF121       | 0.0002 |
| C17orf99     | 0.0002 |
| MON1B        | 0.0002 |
| CLASP2       | 0.0002 |
| 2-Mar        | 0.0002 |
| ST3GAL2      | 0.0002 |
| TMSB10       | 0.0002 |
| LOC100288911 | 0.0002 |
| NUP107       | 0.0002 |
| NCR1         | 0.0002 |
| OR7A5        | 0.0002 |
| PIF1         | 0.0002 |
| SMTNL2       | 0.0002 |

|              |        |
|--------------|--------|
| PRELP        | 0.0002 |
| PIGV         | 0.0002 |
| APRT         | 0.0002 |
| CBLB         | 0.0002 |
| DCDC2        | 0.0002 |
| GPI          | 0.0002 |
| PROL1        | 0.0002 |
| FOPNL        | 0.0002 |
| EDIL3        | 0.0002 |
| NME2P1       | 0.0002 |
| DHRS3        | 0.0002 |
| ZMYND17      | 0.0002 |
| KRTCAP2      | 0.0002 |
| BTLA         | 0.0002 |
| C6orf132     | 0.0002 |
| LOC100506485 | 0.0002 |
| NKAIN2       | 0.0002 |
| SPHK1        | 0.0002 |
| CTLA4        | 0.0002 |
| SIGLEC11     | 0.0002 |
| ADRA1B       | 0.0002 |
| ARF6         | 0.0002 |
| PIK3R4       | 0.0002 |
| C20orf4      | 0.0002 |
| CPM          | 0.0002 |
| ABCG4        | 0.0002 |
| HPDL         | 0.0002 |
| ALS2CL       | 0.0002 |
| TRAF3IP2-AS1 | 0.0002 |
| HSD17B6      | 0.0002 |
| C12orf74     | 0.0002 |
| PSMD5        | 0.0002 |
| MAP4K3       | 0.0002 |
| NUP62        | 0.0002 |
| P2RY12       | 0.0002 |
| RAB9A        | 0.0002 |
| IL34         | 0.0002 |
| C19orf34     | 0.0002 |
| MIF          | 0.0002 |
| MTCH1        | 0.0002 |
| LOC100507053 | 0.0002 |
| TRDMT1       | 0.0002 |
| DIRC2        | 0.0002 |
| URB1         | 0.0002 |
| CRTAP        | 0.0002 |
| LSMD1        | 0.0002 |

|              |        |
|--------------|--------|
| UMODL1       | 0.0002 |
| PRAMEF1      | 0.0002 |
| GNG11        | 0.0002 |
| KIAA1549     | 0.0002 |
| NUDT5        | 0.0002 |
| CHSY3        | 0.0002 |
| GPR82        | 0.0002 |
| LOC401010    | 0.0002 |
| LOC100506472 | 0.0002 |
| GLTPD1       | 0.0002 |
| ZNF185       | 0.0002 |
| ADAMTSL2     | 0.0002 |
| PHF16        | 0.0002 |
| TRIAP1       | 0.0002 |
| ZNHIT3       | 0.0002 |
| LOC100509091 | 0.0002 |
| ATXN3        | 0.0002 |
| CCL8         | 0.0002 |
| GULP1        | 0.0002 |
| UTP14C       | 0.0002 |
| PTBP2        | 0.0002 |
| TIGD4        | 0.0002 |
| SDAD1        | 0.0002 |
| BTD          | 0.0002 |
| PEX6         | 0.0002 |
| DOLPP1       | 0.0002 |
| COL6A5       | 0.0002 |
| SPEF1        | 0.0002 |
| C2orf27A     | 0.0002 |
| TRAF2        | 0.0002 |
| PEX16        | 0.0002 |
| KIAA1328     | 0.0002 |
| SSR4         | 0.0002 |
| GABRB2       | 0.0002 |
| CST9L        | 0.0002 |
| ROBO4        | 0.0002 |
| ELOVL2       | 0.0002 |
| C9orf84      | 0.0002 |
| CTU1         | 0.0002 |
| MARK4        | 0.0002 |
| GHRL         | 0.0002 |
| HDAC8        | 0.0002 |
| MBD3         | 0.0002 |
| PAGE4        | 0.0002 |
| APOO         | 0.0002 |
| ACVRL1       | 0.0002 |

|              |        |
|--------------|--------|
| ZSCAN10      | 0.0002 |
| ALAS1        | 0.0002 |
| TNK1         | 0.0002 |
| OLIG3        | 0.0002 |
| BICC1        | 0.0002 |
| FLJ40712     | 0.0002 |
| CT45A1       | 0.0002 |
| NDUFS3       | 0.0002 |
| LOC399744    | 0.0002 |
| TBC1D2       | 0.0002 |
| SLC26A7      | 0.0002 |
| GPR107       | 0.0002 |
| CCDC140      | 0.0002 |
| ZNF720       | 0.0002 |
| TMEM164      | 0.0002 |
| ARFGAP1      | 0.0002 |
| HNF1B        | 0.0002 |
| GP5          | 0.0002 |
| CRIPAK       | 0.0002 |
| LOC148413    | 0.0002 |
| CPNE4        | 0.0002 |
| LOC100506542 | 0.0002 |
| PACS2        | 0.0002 |
| NAPA         | 0.0002 |
| LOC100130256 | 0.0002 |
| WT1          | 0.0002 |
| SPIRE1       | 0.0002 |
| SMEK1        | 0.0002 |
| CCDC24       | 0.0002 |
| PRR5L        | 0.0002 |
| NMI          | 0.0002 |
| ALKBH4       | 0.0002 |
| GFM1         | 0.0002 |
| KLHL26       | 0.0002 |
| NDUFA11      | 0.0002 |
| OR7C2        | 0.0002 |
| CAPZA1       | 0.0002 |
| LINC00319    | 0.0002 |
| MAGEE2       | 0.0002 |
| IL20         | 0.0002 |
| ADAMDEC1     | 0.0002 |
| RAN          | 0.0002 |
| LOC100507520 | 0.0002 |
| OTX2         | 0.0002 |
| TCP11L1      | 0.0002 |
| MAPK1        | 0.0002 |

|              |        |
|--------------|--------|
| IGLON5       | 0.0002 |
| NIM1         | 0.0002 |
| FLJ36116     | 0.0002 |
| OGFRL1       | 0.0002 |
| KATNAL1      | 0.0002 |
| MKRN3        | 0.0002 |
| NDRG3        | 0.0002 |
| OR4C3        | 0.0002 |
| ENPEP        | 0.0002 |
| MMEL1        | 0.0002 |
| C2orf16      | 0.0002 |
| CALCOCO1     | 0.0002 |
| PRDM4        | 0.0002 |
| LOC728407    | 0.0002 |
| RSPH4A       | 0.0002 |
| HNF1A-AS1    | 0.0002 |
| FBXO16       | 0.0002 |
| LOC729313    | 0.0002 |
| WIPF2        | 0.0002 |
| SYTL4        | 0.0002 |
| FGFR4        | 0.0002 |
| PTK7         | 0.0002 |
| CSAG2        | 0.0002 |
| CPLX1        | 0.0002 |
| MEPE         | 0.0002 |
| ELOVL4       | 0.0002 |
| MYO1D        | 0.0002 |
| RCCD1        | 0.0002 |
| SAMD8        | 0.0002 |
| WRAP73       | 0.0002 |
| MYO1H        | 0.0002 |
| CDK5         | 0.0002 |
| CENPK        | 0.0002 |
| ZNF365       | 0.0002 |
| CCL15        | 0.0002 |
| SHOX2        | 0.0002 |
| ZFR2         | 0.0002 |
| LOC100505564 | 0.0002 |
| CCDC40       | 0.0002 |
| PRSS16       | 0.0002 |
| CBX5         | 0.0002 |
| DNAJC11      | 0.0002 |
| MNT          | 0.0002 |
| SYNJ2BP      | 0.0002 |
| WDR53        | 0.0002 |
| CASP5        | 0.0002 |

|              |        |
|--------------|--------|
| ADAMTS12     | 0.0002 |
| ENKUR        | 0.0002 |
| SRCRB4D      | 0.0002 |
| RPP14        | 0.0002 |
| SNHG7        | 0.0002 |
| HNRNPA1P27   | 0.0002 |
| PRPSAP2      | 0.0002 |
| LOC283278    | 0.0002 |
| FAM69B       | 0.0002 |
| FSCN2        | 0.0002 |
| ATP6V0B      | 0.0002 |
| RPL9         | 0.0002 |
| STK3         | 0.0002 |
| NT5C2        | 0.0002 |
| MBIP         | 0.0002 |
| PLBD2        | 0.0002 |
| CBFA2T2      | 0.0002 |
| C21orf37     | 0.0002 |
| SMAD5        | 0.0002 |
| VDAC1        | 0.0002 |
| LOC728613    | 0.0002 |
| LOC100506668 | 0.0002 |
| MOSPD2       | 0.0002 |
| TTC39C       | 0.0002 |
| LOC100652821 | 0.0002 |
| NFKBIL1      | 0.0002 |
| C3orf75      | 0.0002 |
| SNHG13       | 0.0002 |
| TPTE2        | 0.0002 |
| CDK8         | 0.0002 |
| ZNF192       | 0.0002 |
| SDC4         | 0.0002 |
| HOXA10       | 0.0002 |
| CES5A        | 0.0002 |
| FAM3D        | 0.0002 |
| SLC25A43     | 0.0002 |
| ZNF423       | 0.0002 |
| BRCA2        | 0.0002 |
| PRDM2        | 0.0002 |
| LOC100506659 | 0.0002 |
| HCG4B        | 0.0002 |
| KCNV1        | 0.0002 |
| LOC100131733 | 0.0002 |
| HECA         | 0.0002 |
| SLC30A4      | 0.0002 |
| GYS2         | 0.0002 |

|              |        |
|--------------|--------|
| ALOX5AP      | 0.0002 |
| KCND3        | 0.0002 |
| KIAA1107     | 0.0002 |
| DNAJA4       | 0.0002 |
| FEM1B        | 0.0002 |
| DTWD1        | 0.0002 |
| LOC100287590 | 0.0002 |
| FGL1         | 0.0002 |
| NOX5         | 0.0002 |
| WIP12        | 0.0002 |
| WISP2        | 0.0002 |
| NAE1         | 0.0002 |
| ZNF658       | 0.0002 |
| ATOX1        | 0.0002 |
| ROGDI        | 0.0002 |
| NMBR         | 0.0002 |
| CREG2        | 0.0002 |
| AGA          | 0.0002 |
| PLEKHF2      | 0.0002 |
| UNG          | 0.0002 |
| INTU         | 0.0002 |
| CACNA1B      | 0.0002 |
| PRDM16       | 0.0002 |
| RSPH3        | 0.0002 |
| SETD1B       | 0.0002 |
| NPC2         | 0.0002 |
| ARPC1B       | 0.0002 |
| ROR2         | 0.0002 |
| C7orf61      | 0.0002 |
| CCR2         | 0.0002 |
| PCYT1B       | 0.0002 |
| DNAJC5       | 0.0002 |
| RNASEL       | 0.0002 |
| ARFRP1       | 0.0002 |
| ZNF500       | 0.0002 |
| MSLNL        | 0.0002 |
| NMNAT1       | 0.0002 |
| FAM131A      | 0.0002 |
| TDG          | 0.0002 |
| SCAF1        | 0.0002 |
| QRICH1       | 0.0002 |
| SLC25A11     | 0.0002 |
| ARFIP1       | 0.0002 |
| C8orf31      | 0.0002 |
| GALNT6       | 0.0002 |
| FXR2         | 0.0002 |

|              |        |
|--------------|--------|
| CCDC164      | 0.0002 |
| TPRX1        | 0.0002 |
| TSHR         | 0.0002 |
| ITGAM        | 0.0002 |
| OSCAR        | 0.0002 |
| TAB3         | 0.0002 |
| DAND5        | 0.0002 |
| DDX23        | 0.0002 |
| GABRR2       | 0.0002 |
| SPATA3       | 0.0002 |
| BIN3         | 0.0002 |
| UBE2E1       | 0.0002 |
| CARD9        | 0.0002 |
| TNP1         | 0.0002 |
| LACRT        | 0.0002 |
| NPB          | 0.0002 |
| PPARGC1B     | 0.0002 |
| PGAP3        | 0.0002 |
| ABP1         | 0.0002 |
| ZFHX4        | 0.0002 |
| NMUR2        | 0.0002 |
| LOC727982    | 0.0002 |
| LOC100506853 | 0.0002 |
| TSPAN16      | 0.0002 |
| LOC100507100 | 0.0002 |
| CCDC17       | 0.0002 |
| CABYR        | 0.0002 |
| OBP2A        | 0.0002 |
| RORB         | 0.0002 |
| PCDHB18      | 0.0002 |
| RAI2         | 0.0002 |
| LOC100506125 | 0.0002 |
| PIAS1        | 0.0002 |
| IL28RA       | 0.0002 |
| ZBTB7A       | 0.0002 |
| ZNF12        | 0.0002 |
| OTUD3        | 0.0002 |
| GUSBP10      | 0.0002 |
| PTGDR        | 0.0002 |
| PPP3CB       | 0.0002 |
| SLC9A11      | 0.0002 |
| LINC00326    | 0.0002 |
| ZNF483       | 0.0002 |
| TTK          | 0.0002 |
| DCAF17       | 0.0002 |
| XKRY2        | 0.0002 |



|           |        |
|-----------|--------|
| RHOBTB2   | 0.0002 |
| SELM      | 0.0002 |
| RANGAP1   | 0.0002 |
| LINC00208 | 0.0002 |
| EDNRA     | 0.0002 |
| GABPB2    | 0.0002 |
| TSPAN19   | 0.0002 |
| C9orf135  | 0.0002 |
| MAL       | 0.0002 |
| ZNF850    | 0.0002 |
| PRRG2     | 0.0002 |
| TAF6L     | 0.0002 |
| LINC00482 | 0.0002 |
| SLC43A1   | 0.0002 |
| WDR5      | 0.0002 |
| AKNAD1    | 0.0002 |
| ZC3H12C   | 0.0002 |
| SON       | 0.0002 |
| GOLGA8IP  | 0.0002 |
| CYP4B1    | 0.0002 |
| GAPDHS    | 0.0002 |
| RPSAP52   | 0.0002 |
| WDR33     | 0.0002 |
| IMPA2     | 0.0002 |
| TPD52L1   | 0.0002 |
| FAM120A   | 0.0002 |
| KANK3     | 0.0002 |
| ADI1      | 0.0002 |
| RBMS2     | 0.0002 |
| IL18      | 0.0002 |
| PRO2852   | 0.0002 |
| RBP5      | 0.0002 |
| B3GNT7    | 0.0002 |
| DNTT      | 0.0002 |
| KLHL12    | 0.0002 |
| MNX1      | 0.0002 |
| OR4N4     | 0.0002 |
| DNASE2B   | 0.0002 |
| RAB10     | 0.0002 |
| LHCGR     | 0.0002 |
| PMS2P4    | 0.0002 |
| METTL20   | 0.0002 |
| PARVB     | 0.0002 |
| TOR3A     | 0.0002 |
| LOC439911 | 0.0002 |
| ZCCHC3    | 0.0002 |

|              |        |
|--------------|--------|
| LOC285740    | 0.0002 |
| SF3B14       | 0.0002 |
| DCST1        | 0.0002 |
| EFHA1        | 0.0002 |
| ECT2L        | 0.0002 |
| SIX5         | 0.0002 |
| ZNF574       | 0.0002 |
| SMAD5-AS1    | 0.0002 |
| MIR1245A     | 0.0002 |
| ANKRD49      | 0.0002 |
| SLC25A38     | 0.0002 |
| KCNJ1        | 0.0002 |
| PHF21A       | 0.0002 |
| IQSEC1       | 0.0002 |
| TCEAL3       | 0.0002 |
| SCAP         | 0.0002 |
| C3           | 0.0002 |
| ANAPC2       | 0.0002 |
| PITPNC1      | 0.0002 |
| LOC100506571 | 0.0002 |
| KIAA0922     | 0.0002 |
| NUDT6        | 0.0002 |
| DCLK3        | 0.0002 |
| ISM1         | 0.0002 |
| KLRAP1       | 0.0002 |
| SCAND3       | 0.0002 |
| SPAG5-AS1    | 0.0002 |
| LOC644662    | 0.0002 |
| ASF1B        | 0.0002 |
| ATAD5        | 0.0002 |
| RNF133       | 0.0002 |
| NADSYN1      | 0.0002 |
| YIPF4        | 0.0002 |
| DTX1         | 0.0002 |
| COLEC10      | 0.0002 |
| LOC642852    | 0.0002 |
| FGFR1OP2     | 0.0002 |
| RAD51AP1     | 0.0002 |
| SLC25A21     | 0.0002 |
| CCDC87       | 0.0002 |
| LOC100134229 | 0.0002 |
| MAGEF1       | 0.0002 |
| PSMD11       | 0.0002 |
| ATP6V0CP3    | 0.0002 |
| CNOT2        | 0.0002 |
| KIR3DL3      | 0.0002 |

|           |        |
|-----------|--------|
| GPR87     | 0.0002 |
| NOTCH1    | 0.0002 |
| CORO6     | 0.0002 |
| EPRS      | 0.0002 |
| FRYL      | 0.0002 |
| INPP5F    | 0.0002 |
| KIAA0748  | 0.0002 |
| LOC645166 | 0.0002 |
| FHL2      | 0.0002 |
| HSCB      | 0.0002 |
| C1QTNF4   | 0.0002 |
| RND1      | 0.0002 |
| DNAL1     | 0.0002 |
| NUDT16P1  | 0.0002 |
| SLC40A1   | 0.0002 |
| LOC729173 | 0.0002 |
| GAPVD1    | 0.0002 |
| MGAT5B    | 0.0002 |
| GIPC2     | 0.0002 |
| PWP1      | 0.0002 |
| C2orf77   | 0.0002 |
| CTXN1     | 0.0002 |
| RPL15     | 0.0002 |
| COPS4     | 0.0002 |
| RWDD2A    | 0.0002 |
| C21orf91  | 0.0002 |
| CHRD12    | 0.0002 |
| POU3F3    | 0.0002 |
| SIRT5     | 0.0002 |
| C17orf104 | 0.0002 |
| AMOT      | 0.0002 |
| PRAMEF10  | 0.0002 |
| CCDC51    | 0.0002 |
| PTPLAD1   | 0.0002 |
| TNFRSF13C | 0.0002 |
| NTRK2     | 0.0002 |
| ZNF664    | 0.0002 |
| LDB2      | 0.0002 |
| ESRRA     | 0.0002 |
| SV2B      | 0.0002 |
| MTSS1     | 0.0002 |
| FAM27L    | 0.0002 |
| TNFAIP3   | 0.0002 |
| MRPS26    | 0.0002 |
| NPPA      | 0.0002 |
| MYH14     | 0.0002 |

|              |        |
|--------------|--------|
| GPR37        | 0.0002 |
| PEF1         | 0.0002 |
| TLL1         | 0.0002 |
| CLIP3        | 0.0002 |
| GRP          | 0.0002 |
| SLMAP        | 0.0002 |
| ADORA2A      | 0.0002 |
| C8orf56      | 0.0002 |
| TEX15        | 0.0002 |
| DNM3OS       | 0.0002 |
| RABEPK       | 0.0002 |
| DPY19L1P1    | 0.0002 |
| CELA3B       | 0.0002 |
| NBEA         | 0.0002 |
| ZCCHC13      | 0.0002 |
| RNF220       | 0.0002 |
| RAPGEF3      | 0.0002 |
| NCAPG        | 0.0002 |
| APOC1        | 0.0002 |
| TC2N         | 0.0002 |
| PIGZ         | 0.0002 |
| LOC100132005 | 0.0002 |
| ANLN         | 0.0002 |
| POU4F1       | 0.0002 |
| LOC284570    | 0.0002 |
| C16orf92     | 0.0002 |
| MGAT4C       | 0.0002 |
| PSRC1        | 0.0002 |
| RARRES1      | 0.0002 |
| UAP1L1       | 0.0002 |
| KIAA1755     | 0.0002 |
| INTS6        | 0.0002 |
| CEP112       | 0.0002 |
| SUCLG2       | 0.0002 |
| S100A16      | 0.0002 |
| IQCF4        | 0.0002 |
| RPAP1        | 0.0002 |
| NPY2R        | 0.0002 |
| VRK2         | 0.0002 |
| ARL8B        | 0.0002 |
| E2F6         | 0.0002 |
| C20orf108    | 0.0002 |
| HLCS         | 0.0002 |
| LRMP         | 0.0002 |
| CORO1C       | 0.0002 |
| MYH9         | 0.0002 |

|              |        |
|--------------|--------|
| GPR97        | 0.0002 |
| TMEM56       | 0.0002 |
| DNAH5        | 0.0002 |
| GSTP1        | 0.0002 |
| LILRB2       | 0.0002 |
| HIC2         | 0.0002 |
| PPIB         | 0.0002 |
| USP26        | 0.0002 |
| ZNF527       | 0.0002 |
| DAOA         | 0.0002 |
| PRDM11       | 0.0002 |
| GLRX         | 0.0002 |
| ZNF259P1     | 0.0002 |
| NMRAL1       | 0.0002 |
| ERVV-1       | 0.0002 |
| FOLR3        | 0.0002 |
| CTDNEP1      | 0.0002 |
| S1PR5        | 0.0002 |
| ATP8B2       | 0.0002 |
| WFDC12       | 0.0002 |
| BIRC5        | 0.0002 |
| ALPL         | 0.0002 |
| CCDC9        | 0.0002 |
| ADAMTS13     | 0.0002 |
| CCIN         | 0.0002 |
| ACSL3        | 0.0002 |
| CCNE2        | 0.0002 |
| TBC1D25      | 0.0002 |
| MMP2         | 0.0002 |
| PENK         | 0.0002 |
| CLASP1       | 0.0002 |
| CTRC         | 0.0002 |
| LOC100505606 | 0.0002 |
| TBL3         | 0.0002 |
| RBM42        | 0.0002 |
| TRIM10       | 0.0002 |
| DYNC1I1      | 0.0002 |
| STK11IP      | 0.0002 |
| IGF2BP1      | 0.0002 |
| KDSR         | 0.0002 |
| COL9A2       | 0.0002 |
| PIK3R1OS     | 0.0002 |
| FERD3L       | 0.0002 |
| ZBTB49       | 0.0002 |
| SULT1B1      | 0.0002 |
| LONP1        | 0.0002 |

|              |        |
|--------------|--------|
| CLRN1        | 0.0002 |
| TBC1D14      | 0.0002 |
| ZBTB47       | 0.0002 |
| C12orf60     | 0.0002 |
| DLX4         | 0.0002 |
| PTPN14       | 0.0002 |
| GGTLC1       | 0.0002 |
| CCDC97       | 0.0002 |
| LOC100131138 | 0.0002 |
| ZAP70        | 0.0002 |
| TRIP11       | 0.0002 |
| UTP18        | 0.0002 |
| CXorf26      | 0.0002 |
| HECTD3       | 0.0002 |
| CASQ1        | 0.0002 |
| HIST2H3D     | 0.0002 |
| TTY4C        | 0.0002 |
| PNCK         | 0.0002 |
| SERPINB3     | 0.0002 |
| ARL13B       | 0.0002 |
| RASGRP4      | 0.0002 |
| MLNR         | 0.0002 |
| CYB561D1     | 0.0002 |
| C2orf84      | 0.0002 |
| FEN1         | 0.0002 |
| IGHD         | 0.0002 |
| ZNF536       | 0.0002 |
| RHCG         | 0.0002 |
| CCL19        | 0.0002 |
| BHLHE41      | 0.0002 |
| CDH6         | 0.0002 |
| GPR55        | 0.0002 |
| FLVCR1-AS1   | 0.0002 |
| REM1         | 0.0002 |
| CACNA1H      | 0.0002 |
| EHD3         | 0.0002 |
| DNLZ         | 0.0002 |
| RTKN2        | 0.0002 |
| 9-Sep        | 0.0002 |
| CD86         | 0.0002 |
| NEURL3       | 0.0002 |
| MAGEE1       | 0.0002 |
| PNPLA7       | 0.0002 |
| C1orf135     | 0.0002 |
| POP7         | 0.0002 |
| MGC4859      | 0.0002 |

|              |        |
|--------------|--------|
| SELENBP1     | 0.0002 |
| ZNF432       | 0.0002 |
| PI15         | 0.0002 |
| PKM2         | 0.0002 |
| XKRX         | 0.0002 |
| RAPGEF2      | 0.0002 |
| GRIK1-AS2    | 0.0002 |
| AGPAT4-IT1   | 0.0002 |
| LY6H         | 0.0002 |
| VPS37D       | 0.0002 |
| STAT3        | 0.0002 |
| ZMYND10      | 0.0002 |
| ABCA13       | 0.0002 |
| SORCS3       | 0.0002 |
| DHRS2        | 0.0002 |
| RPS20P27     | 0.0002 |
| IL26         | 0.0002 |
| CST8         | 0.0002 |
| LOC100506667 | 0.0002 |
| MND1         | 0.0002 |
| ZNF717       | 0.0002 |
| ADH6         | 0.0002 |
| PKD1L3       | 0.0002 |
| ZNF395       | 0.0002 |
| MAP4K2       | 0.0002 |
| TF           | 0.0002 |
| DENND4B      | 0.0002 |
| SLITRK5      | 0.0002 |
| LIG3         | 0.0002 |
| KLHL21       | 0.0002 |
| MYL12B       | 0.0002 |
| BEND7        | 0.0002 |
| HSP90B1      | 0.0002 |
| KAT2A        | 0.0002 |
| IL18BP       | 0.0002 |
| NUDT9P1      | 0.0002 |
| ZFHX3        | 0.0002 |
| TERF2        | 0.0002 |
| ZNF547       | 0.0002 |
| ARHGAP21     | 0.0002 |
| KIF18A       | 0.0002 |
| CEP68        | 0.0002 |
| FLJ39534     | 0.0002 |
| EMB          | 0.0002 |
| TRPM3        | 0.0002 |
| SYNGR1       | 0.0002 |

|              |        |
|--------------|--------|
| RHBDD1       | 0.0002 |
| LOC100652770 | 0.0002 |
| TCEANC2      | 0.0002 |
| LMO3         | 0.0002 |
| BIK          | 0.0002 |
| C2orf88      | 0.0002 |
| SLC10A2      | 0.0002 |
| MT1A         | 0.0002 |
| MID2         | 0.0002 |
| IGSF6        | 0.0002 |
| CUEDC2       | 0.0002 |
| TOX4         | 0.0002 |
| ASB13        | 0.0002 |
| PDHX         | 0.0002 |
| LENG9        | 0.0002 |
| GLT1D1       | 0.0002 |
| DFFA         | 0.0002 |
| ZNF331       | 0.0002 |
| ABCB8        | 0.0002 |
| SRPRB        | 0.0002 |
| COG2         | 0.0002 |
| SNAPC4       | 0.0002 |
| LY6G6C       | 0.0002 |
| FLJ43663     | 0.0002 |
| CCDC136      | 0.0002 |
| PGBD5        | 0.0002 |
| GPR112       | 0.0002 |
| NAIF1        | 0.0002 |
| SUPT5H       | 0.0002 |
| FAM124A      | 0.0002 |
| LGALS14      | 0.0002 |
| INPP5K       | 0.0002 |
| OR7E5P       | 0.0002 |
| DAZAP1       | 0.0002 |
| MST4         | 0.0002 |
| RILPL1       | 0.0002 |
| OR12D2       | 0.0002 |
| FTSJ2        | 0.0002 |
| LOC100507307 | 0.0002 |
| A1BG-AS1     | 0.0002 |
| LOC100132330 | 0.0002 |
| LDLRAP1      | 0.0002 |
| SLC14A1      | 0.0002 |
| KCNJ12       | 0.0002 |
| ZEB2         | 0.0002 |
| UBXN2A       | 0.0002 |



|              |        |
|--------------|--------|
| RNF144B      | 0.0002 |
| IL13         | 0.0002 |
| KRTAP10-10   | 0.0002 |
| TRIM73       | 0.0002 |
| MDH2         | 0.0002 |
| ZNF280A      | 0.0002 |
| FAM161A      | 0.0002 |
| C15orf41     | 0.0002 |
| C20orf202    | 0.0002 |
| TCP10L       | 0.0002 |
| RBP1         | 0.0002 |
| LY6D         | 0.0002 |
| C17orf39     | 0.0002 |
| TMX1         | 0.0002 |
| SCRG1        | 0.0002 |
| MRPL28       | 0.0002 |
| APOPT1       | 0.0002 |
| DPP9         | 0.0002 |
| LOC100129572 | 0.0002 |
| TMEM188      | 0.0002 |
| CCDC135      | 0.0002 |
| SGMS1        | 0.0002 |
| OXCT2        | 0.0002 |
| ACMSD        | 0.0002 |
| LOC100509100 | 0.0002 |
| USP5         | 0.0002 |
| C14orf39     | 0.0002 |
| CCDC67       | 0.0002 |
| ATP11C       | 0.0002 |
| USP44        | 0.0002 |
| C9orf116     | 0.0002 |
| AKR7A3       | 0.0002 |
| ARPC5        | 0.0002 |
| CHGB         | 0.0002 |
| SSH3         | 0.0002 |
| SCYL2        | 0.0002 |
| PYDC1        | 0.0002 |
| ZNF195       | 0.0002 |
| SPINT2       | 0.0002 |
| FLJ43681     | 0.0002 |
| LOC730183    | 0.0002 |
| CYP2J2       | 0.0002 |
| RSRC1        | 0.0002 |
| LOC100132240 | 0.0002 |
| FLJ40852     | 0.0002 |
| KIF1B        | 0.0002 |

|              |        |
|--------------|--------|
| CCDC125      | 0.0002 |
| TCF3         | 0.0002 |
| C19orf53     | 0.0002 |
| TNFRSF11B    | 0.0002 |
| RXRA         | 0.0002 |
| ZNF28        | 0.0002 |
| RPL3         | 0.0002 |
| ARHGAP6      | 0.0002 |
| TMEM37       | 0.0002 |
| GLE1         | 0.0002 |
| MCM3AP-AS1   | 0.0002 |
| MAML2        | 0.0002 |
| MFAP3        | 0.0002 |
| BARX1        | 0.0002 |
| FAM5B        | 0.0002 |
| GMFB         | 0.0002 |
| NME6         | 0.0002 |
| CCL20        | 0.0002 |
| TFR2         | 0.0002 |
| SCAI         | 0.0002 |
| GRIN1        | 0.0002 |
| LOC100507190 | 0.0002 |
| CORO1A       | 0.0002 |
| NOL12        | 0.0002 |
| COG5         | 0.0002 |
| ZNF384       | 0.0002 |
| RAD21        | 0.0002 |
| CAMKV        | 0.0002 |
| TP53I13      | 0.0002 |
| GCH1         | 0.0002 |
| FNTB         | 0.0002 |
| KIAA0319L    | 0.0002 |
| TMEM160      | 0.0002 |
| IGSF21       | 0.0002 |
| CLEC12B      | 0.0002 |
| LOC100506478 | 0.0002 |
| KAL1         | 0.0002 |
| LOC441495    | 0.0002 |
| C4orf48      | 0.0002 |
| ATP5G1       | 0.0002 |
| LOC100287628 | 0.0002 |
| INE1         | 0.0002 |
| MBLAC2       | 0.0002 |
| OAT          | 0.0002 |
| C1orf126     | 0.0002 |
| SNUPN        | 0.0002 |

|              |        |
|--------------|--------|
| PCBP2        | 0.0002 |
| HBZ          | 0.0002 |
| SERPINA4     | 0.0002 |
| CATSPER3     | 0.0002 |
| PTGES        | 0.0002 |
| ZNF44        | 0.0002 |
| HDDC3        | 0.0002 |
| IL17D        | 0.0002 |
| TYRO3        | 0.0002 |
| OPN1SW       | 0.0002 |
| ZNF41        | 0.0002 |
| TUBB2B       | 0.0002 |
| CCDC85B      | 0.0002 |
| DNPEP        | 0.0002 |
| PBLD         | 0.0002 |
| POLR2J4      | 0.0002 |
| MRO          | 0.0002 |
| LOC100329135 | 0.0002 |
| TSPAN14      | 0.0002 |
| HSFY2        | 0.0002 |
| DRP2         | 0.0002 |
| RAC3         | 0.0002 |
| DERL3        | 0.0002 |
| AIDA         | 0.0002 |
| LOC441666    | 0.0002 |
| C18orf49     | 0.0002 |
| PIP4K2A      | 0.0002 |
| PARP4        | 0.0002 |
| OR1D2        | 0.0002 |
| MTHFS        | 0.0002 |
| ZNF561       | 0.0002 |
| RCL1         | 0.0002 |
| GCNT1        | 0.0002 |
| UGT2B4       | 0.0002 |
| ZNF136       | 0.0002 |
| FGD2         | 0.0002 |
| KCNJ16       | 0.0002 |
| LOC100189589 | 0.0002 |
| RAB26        | 0.0002 |
| C2orf51      | 0.0002 |
| PABPC1       | 0.0002 |
| ANO1         | 0.0002 |
| KRR1         | 0.0002 |
| PRTN3        | 0.0002 |
| SGK1         | 0.0002 |
| SERAC1       | 0.0002 |

|              |        |
|--------------|--------|
| POU5F1P3     | 0.0002 |
| MPRIP        | 0.0002 |
| PI3          | 0.0002 |
| IMPA1        | 0.0002 |
| MYL6         | 0.0002 |
| CCDC60       | 0.0002 |
| ACOT8        | 0.0002 |
| AP3S2        | 0.0002 |
| NECAP2       | 0.0002 |
| ZDHHC23      | 0.0002 |
| RPE65        | 0.0002 |
| BMP7         | 0.0002 |
| IMP5         | 0.0002 |
| LINC00264    | 0.0002 |
| RNASET2      | 0.0002 |
| TMEM173      | 0.0002 |
| C19orf25     | 0.0002 |
| RANGRF       | 0.0002 |
| SKIV2L2      | 0.0002 |
| SRSF7        | 0.0002 |
| RNF5         | 0.0002 |
| CXCL10       | 0.0002 |
| LRRC41       | 0.0002 |
| BTN2A2       | 0.0002 |
| NKX2-2       | 0.0002 |
| ART1         | 0.0002 |
| HLA-DRB5     | 0.0002 |
| ATP6V0C      | 0.0002 |
| CNTNAP3B     | 0.0002 |
| KLK9         | 0.0002 |
| IRF1         | 0.0002 |
| LOC100130278 | 0.0002 |
| HCN1         | 0.0002 |
| FLVCR2       | 0.0002 |
| TWF1         | 0.0002 |
| KIAA0319     | 0.0002 |
| UBXN10       | 0.0002 |
| MAP4K4       | 0.0002 |
| FBXW5        | 0.0002 |
| NAT9         | 0.0002 |
| MED12        | 0.0002 |
| CDK2AP1      | 0.0002 |
| ZNF266       | 0.0002 |
| VTN          | 0.0002 |
| PARK2        | 0.0002 |
| RNF208       | 0.0002 |

|              |        |
|--------------|--------|
| EPHA5        | 0.0002 |
| VCAN         | 0.0002 |
| CLDN16       | 0.0002 |
| XIRP1        | 0.0002 |
| SSPO         | 0.0002 |
| HIST1H2BM    | 0.0002 |
| SLC25A2      | 0.0002 |
| LOC100652951 | 0.0002 |
| STAU1        | 0.0002 |
| CPLX3        | 0.0002 |
| EFHB         | 0.0002 |
| PPL          | 0.0002 |
| DMGDH        | 0.0002 |
| GBP3         | 0.0002 |
| LOC100506317 | 0.0002 |
| CHST1        | 0.0002 |
| MAP4         | 0.0002 |
| LOC100652774 | 0.0002 |
| AES          | 0.0002 |
| C2orf48      | 0.0002 |
| FUK          | 0.0002 |
| KIAA0415     | 0.0002 |
| TIAM2        | 0.0002 |
| TGFBI        | 0.0002 |
| GANAB        | 0.0002 |
| EIF2AK4      | 0.0002 |
| FAM135B      | 0.0002 |
| RPE          | 0.0002 |
| FBN2         | 0.0002 |
| OR51B4       | 0.0002 |
| HAPLN3       | 0.0002 |
| CFL1P1       | 0.0002 |
| C14orf81     | 0.0002 |
| PCDHB19P     | 0.0002 |
| MMD          | 0.0002 |
| GDF6         | 0.0002 |
| ANK2         | 0.0002 |
| HDHD3        | 0.0002 |
| ACACB        | 0.0002 |
| CASKIN1      | 0.0002 |
| DIS3L2       | 0.0002 |
| FAM126B      | 0.0002 |
| SPATA2       | 0.0002 |
| CSTF2T       | 0.0002 |
| CXorf61      | 0.0002 |
| RTN4IP1      | 0.0002 |

|           |        |
|-----------|--------|
| PCGF2     | 0.0002 |
| NKAIN3    | 0.0002 |
| LOC349160 | 0.0002 |
| SACM1L    | 0.0002 |
| DBX2      | 0.0002 |
| SYT10     | 0.0002 |
| RORC      | 0.0002 |
| ASCC2     | 0.0002 |
| ASTN2     | 0.0002 |
| DEFB125   | 0.0002 |
| INPP1     | 0.0002 |
| SNX19     | 0.0002 |
| FCRL1     | 0.0002 |
| ITGA9     | 0.0002 |
| ACP1      | 0.0002 |
| KIF18B    | 0.0002 |
| SNX22     | 0.0002 |
| ADAM18    | 0.0002 |
| BEND5     | 0.0002 |
| OTUD1     | 0.0002 |
| SLC16A10  | 0.0002 |
| DENND3    | 0.0002 |
| FRS3      | 0.0002 |
| WNT9A     | 0.0002 |
| ESX1      | 0.0002 |
| MRC1      | 0.0002 |
| PGAP2     | 0.0002 |
| C5orf52   | 0.0002 |
| LOC400099 | 0.0002 |
| FAM188A   | 0.0002 |
| AHRR      | 0.0002 |
| ASB17     | 0.0002 |
| APBB3     | 0.0001 |
| VN1R4     | 0.0001 |
| C2CD4B    | 0.0001 |
| GCOM1     | 0.0001 |
| VCX3A     | 0.0001 |
| IER3      | 0.0001 |
| C3P1      | 0.0001 |
| OR51E2    | 0.0001 |
| GPR4      | 0.0001 |
| ATP8A1    | 0.0001 |
| IRF2BP2   | 0.0001 |
| SLC7A5    | 0.0001 |
| KIAA0430  | 0.0001 |
| BEND3     | 0.0001 |

|              |        |
|--------------|--------|
| GRK7         | 0.0001 |
| EPM2AIP1     | 0.0001 |
| TBC1D19      | 0.0001 |
| LOC100506865 | 0.0001 |
| PDCD11       | 0.0001 |
| TTLL2        | 0.0001 |
| PSMD8        | 0.0001 |
| EXOSC7       | 0.0001 |
| STK17B       | 0.0001 |
| NAA15        | 0.0001 |
| LINGO4       | 0.0001 |
| PFN1         | 0.0001 |
| ABCC8        | 0.0001 |
| TSTA3        | 0.0001 |
| MRS2         | 0.0001 |
| ABLIM1       | 0.0001 |
| ST14         | 0.0001 |
| ATF4         | 0.0001 |
| KCNK16       | 0.0001 |
| PDCL2        | 0.0001 |
| C21orf49     | 0.0001 |
| TEAD1        | 0.0001 |
| ITIH6        | 0.0001 |
| CCL11        | 0.0001 |
| PPAP2C       | 0.0001 |
| LOC100506748 | 0.0001 |
| KRTAP4-5     | 0.0001 |
| ZNF323       | 0.0001 |
| LOC441601    | 0.0001 |
| WDR54        | 0.0001 |
| FOXE3        | 0.0001 |
| VIL1         | 0.0001 |
| ALOX12P2     | 0.0001 |
| GPHB5        | 0.0001 |
| PIP5KL1      | 0.0001 |
| MYZAP        | 0.0001 |
| SPOCK2       | 0.0001 |
| TIGD5        | 0.0001 |
| PTPRN        | 0.0001 |
| STARD7       | 0.0001 |
| GALM         | 0.0001 |
| PROM1        | 0.0001 |
| ZCCHC6       | 0.0001 |
| SPATA6       | 0.0001 |
| C11orf21     | 0.0001 |
| 12-Sep       | 0.0001 |

|           |        |
|-----------|--------|
| C2orf44   | 0.0001 |
| PPIC      | 0.0001 |
| LILRA5    | 0.0001 |
| CLIC1     | 0.0001 |
| LOC730102 | 0.0001 |
| SLC3A1    | 0.0001 |
| MAGEA12   | 0.0001 |
| TMEM167B  | 0.0001 |
| MFSD7     | 0.0001 |
| BAI2      | 0.0001 |
| ADCK3     | 0.0001 |
| MCRS1     | 0.0001 |
| C4orf17   | 0.0001 |
| LOC389199 | 0.0001 |
| AGPAT5    | 0.0001 |
| OR4C15    | 0.0001 |
| TRMU      | 0.0001 |
| ZNF469    | 0.0001 |
| SAR1A     | 0.0001 |
| DFFB      | 0.0001 |
| GLI1      | 0.0001 |
| PHOX2A    | 0.0001 |
| SLCO6A1   | 0.0001 |
| BCL2      | 0.0001 |
| CKMT2     | 0.0001 |
| NFIX      | 0.0001 |
| KCNC3     | 0.0001 |
| LRRC47    | 0.0001 |
| MT1F      | 0.0001 |
| PREP      | 0.0001 |
| ADD1      | 0.0001 |
| LCA5      | 0.0001 |
| C13orf26  | 0.0001 |
| LRRC72    | 0.0001 |
| WDR74     | 0.0001 |
| TTC23     | 0.0001 |
| EFCAB2    | 0.0001 |
| SLFN12    | 0.0001 |
| TAPBPL    | 0.0001 |
| AGER      | 0.0001 |
| GLP1R     | 0.0001 |
| ADAM7     | 0.0001 |
| MBNL3     | 0.0001 |
| ATP1B2    | 0.0001 |
| LPHN3     | 0.0001 |
| POLE3     | 0.0001 |



|           |        |
|-----------|--------|
| MKRN2     | 0.0001 |
| PPP1R26   | 0.0001 |
| SF3B3     | 0.0001 |
| FAM120AOS | 0.0001 |
| XRCC2     | 0.0001 |
| FLJ11710  | 0.0001 |
| IL4       | 0.0001 |
| PKD1L1    | 0.0001 |
| SLC30A5   | 0.0001 |
| APLP2     | 0.0001 |
| PET112    | 0.0001 |
| LTBP4     | 0.0001 |
| LDLRAD3   | 0.0001 |
| SERPINA2  | 0.0001 |
| C8orf33   | 0.0001 |
| DIRAS1    | 0.0001 |
| C10orf76  | 0.0001 |
| KIDINS220 | 0.0001 |
| LINC00472 | 0.0001 |
| CPE       | 0.0001 |
| PGR       | 0.0001 |
| CACNG7    | 0.0001 |
| PSMC3     | 0.0001 |
| ARPP19    | 0.0001 |
| ABL1      | 0.0001 |
| HK1       | 0.0001 |
| FAM3B     | 0.0001 |
| SKP1      | 0.0001 |
| ACCN3     | 0.0001 |
| RNF6      | 0.0001 |
| RAB8A     | 0.0001 |
| PGAM2     | 0.0001 |
| LOC340073 | 0.0001 |
| ZNF599    | 0.0001 |
| NT5C3     | 0.0001 |
| MRPL42P5  | 0.0001 |
| NEB       | 0.0001 |
| C9orf140  | 0.0001 |
| TRIM49    | 0.0001 |
| PAQR5     | 0.0001 |
| GGTLC2    | 0.0001 |
| MUS81     | 0.0001 |
| AVPI1     | 0.0001 |
| VWCE      | 0.0001 |
| LOC339316 | 0.0001 |
| TINAGL1   | 0.0001 |

|              |        |
|--------------|--------|
| HLA-DPB2     | 0.0001 |
| TIMM44       | 0.0001 |
| LOXL2        | 0.0001 |
| BTN2A1       | 0.0001 |
| ZNF799       | 0.0001 |
| C9orf139     | 0.0001 |
| RPS15A       | 0.0001 |
| DHRS4L1      | 0.0001 |
| ABCB1        | 0.0001 |
| OR2B2        | 0.0001 |
| SRP19        | 0.0001 |
| C17orf98     | 0.0001 |
| ZNF738       | 0.0001 |
| LRP11        | 0.0001 |
| RPS27A       | 0.0001 |
| NLRX1        | 0.0001 |
| PARD3B       | 0.0001 |
| C16orf78     | 0.0001 |
| ERAP2        | 0.0001 |
| LOC338620    | 0.0001 |
| ECEL1P2      | 0.0001 |
| KIF12        | 0.0001 |
| VTA1         | 0.0001 |
| GUCY1B2      | 0.0001 |
| MLLT3        | 0.0001 |
| RAD51        | 0.0001 |
| MMP19        | 0.0001 |
| C6orf174     | 0.0001 |
| LOC100127951 | 0.0001 |
| KRTAP2-4     | 0.0001 |
| CBX4         | 0.0001 |
| GTPBP8       | 0.0001 |
| TFPT         | 0.0001 |
| TMC8         | 0.0001 |
| MST1P9       | 0.0001 |
| FCRL2        | 0.0001 |
| PNLIP        | 0.0001 |
| RAB43        | 0.0001 |
| CEP63        | 0.0001 |
| TCL1B        | 0.0001 |
| FAM13A-AS1   | 0.0001 |
| LYG1         | 0.0001 |
| FAM35A       | 0.0001 |
| COL22A1      | 0.0001 |
| NAA30        | 0.0001 |
| GATAD1       | 0.0001 |

|              |        |
|--------------|--------|
| FLJ42875     | 0.0001 |
| BOD1P        | 0.0001 |
| LUZP1        | 0.0001 |
| LOC100131929 | 0.0001 |
| ATP5I        | 0.0001 |
| C2orf69      | 0.0001 |
| ZCCHC17      | 0.0001 |
| C9orf129     | 0.0001 |
| BHLHE23      | 0.0001 |
| ZNF667       | 0.0001 |
| KIAA0125     | 0.0001 |
| PDCD1LG2     | 0.0001 |
| OR1Q1        | 0.0001 |
| PPM1J        | 0.0001 |
| SAAL1        | 0.0001 |
| CLDN1        | 0.0001 |
| CCDC107      | 0.0001 |
| NDUFAF1      | 0.0001 |
| G3BP1        | 0.0001 |
| SLC45A1      | 0.0001 |
| DLGAP5       | 0.0001 |
| PRMT6        | 0.0001 |
| CDC16        | 0.0001 |
| ITGA8        | 0.0001 |
| LOC389831    | 0.0001 |
| GTF2A1       | 0.0001 |
| CALB2        | 0.0001 |
| DNAAF1       | 0.0001 |
| HOXD9        | 0.0001 |
| PCDHB8       | 0.0001 |
| SIVA1        | 0.0001 |
| UNC13A       | 0.0001 |
| ZNF766       | 0.0001 |
| DCLK2        | 0.0001 |
| NPR2         | 0.0001 |
| FABP1        | 0.0001 |
| FTMT         | 0.0001 |
| TMEM27       | 0.0001 |
| COMMD8       | 0.0001 |
| BTF3P11      | 0.0001 |
| CHMP4C       | 0.0001 |
| ICOSLG       | 0.0001 |
| LNX2         | 0.0001 |
| FSTL4        | 0.0001 |
| SASH1        | 0.0001 |
| AP4M1        | 0.0001 |

|              |        |
|--------------|--------|
| SCN5A        | 0.0001 |
| LIN54        | 0.0001 |
| FPGS         | 0.0001 |
| CAV2         | 0.0001 |
| EXOC3        | 0.0001 |
| LOC100652805 | 0.0001 |
| OFCC1        | 0.0001 |
| KLHL25       | 0.0001 |
| WDR12        | 0.0001 |
| VPS33A       | 0.0001 |
| LOC400756    | 0.0001 |
| CCDC110      | 0.0001 |
| GTF2IRD2     | 0.0001 |
| PLOD3        | 0.0001 |
| LOC100507022 | 0.0001 |
| GCK          | 0.0001 |
| NR2C1        | 0.0001 |
| HIST1H2BA    | 0.0001 |
| CFH          | 0.0001 |
| C20orf107    | 0.0001 |
| OR4A15       | 0.0001 |
| LCE3C        | 0.0001 |
| FGF21        | 0.0001 |
| PQLC1        | 0.0001 |
| TGM7         | 0.0001 |
| LOC100505841 | 0.0001 |
| EXOSC5       | 0.0001 |
| PCDHGA8      | 0.0001 |
| LOC100506795 | 0.0001 |
| ZNF479       | 0.0001 |
| LHX5         | 0.0001 |
| FAM164A      | 0.0001 |
| TIMM17A      | 0.0001 |
| LOC100272216 | 0.0001 |
| LINC00265    | 0.0001 |
| WDR11        | 0.0001 |
| SRD5A2       | 0.0001 |
| TCHP         | 0.0001 |
| ECSIT        | 0.0001 |
| PTGFRN       | 0.0001 |
| DOCK3        | 0.0001 |
| SLC5A8       | 0.0001 |
| FMN2         | 0.0001 |
| CCL3         | 0.0001 |
| ASPDH        | 0.0001 |
| SMNDC1       | 0.0001 |

|              |        |
|--------------|--------|
| SPTLC1       | 0.0001 |
| ARHGAP11A    | 0.0001 |
| ERVH-3       | 0.0001 |
| SLC20A1      | 0.0001 |
| BCAS3        | 0.0001 |
| ADARB2-AS1   | 0.0001 |
| JAM2         | 0.0001 |
| GPR18        | 0.0001 |
| FGF4         | 0.0001 |
| ATP2A2       | 0.0001 |
| TRPC2        | 0.0001 |
| SERPINB8     | 0.0001 |
| UBE2Q2       | 0.0001 |
| G6PC3        | 0.0001 |
| ZYX          | 0.0001 |
| MSN          | 0.0001 |
| CELSR1       | 0.0001 |
| C1orf74      | 0.0001 |
| OBSCN        | 0.0001 |
| MKX          | 0.0001 |
| PRPF4B       | 0.0001 |
| ZNF252       | 0.0001 |
| CCDC132      | 0.0001 |
| IL10RA       | 0.0001 |
| MAMLD1       | 0.0001 |
| CELF4        | 0.0001 |
| THAP6        | 0.0001 |
| RBM20        | 0.0001 |
| DDIT4        | 0.0001 |
| NOL3         | 0.0001 |
| POLR2J       | 0.0001 |
| F8A1         | 0.0001 |
| CACNB2       | 0.0001 |
| PPP1R10      | 0.0001 |
| LOC100129434 | 0.0001 |
| NSMCE1       | 0.0001 |
| AGRN         | 0.0001 |
| RBBP9        | 0.0001 |
| MEP1A        | 0.0001 |
| DEFB119      | 0.0001 |
| DMXL1        | 0.0001 |
| NHLRC2       | 0.0001 |
| SNORD114-3   | 0.0001 |
| KLC3         | 0.0001 |
| IGSF5        | 0.0001 |
| TAF6         | 0.0001 |

|              |        |
|--------------|--------|
| CFHR2        | 0.0001 |
| ZFP1         | 0.0001 |
| OPA3         | 0.0001 |
| SIPA1L3      | 0.0001 |
| SPTSSA       | 0.0001 |
| ZNF18        | 0.0001 |
| L1CAM        | 0.0001 |
| WLS          | 0.0001 |
| PANK2        | 0.0001 |
| TBC1D10B     | 0.0001 |
| ADC          | 0.0001 |
| CLEC4G       | 0.0001 |
| CSNK2B       | 0.0001 |
| ZMYND12      | 0.0001 |
| RECQL5       | 0.0001 |
| PLS1         | 0.0001 |
| POTED        | 0.0001 |
| ZNF84        | 0.0001 |
| C3orf27      | 0.0001 |
| ATL3         | 0.0001 |
| BMS1         | 0.0001 |
| SAMD4A       | 0.0001 |
| POLDIP2      | 0.0001 |
| PBK          | 0.0001 |
| MAP1A        | 0.0001 |
| CSGALNACT2   | 0.0001 |
| ZNF69        | 0.0001 |
| LOC100128843 | 0.0001 |
| CD226        | 0.0001 |
| TPP1         | 0.0001 |
| KLHDC8B      | 0.0001 |
| WHSC2        | 0.0001 |
| UBA5         | 0.0001 |
| COLQ         | 0.0001 |
| NPHS1        | 0.0001 |
| ZFAND2A      | 0.0001 |
| MLL5         | 0.0001 |
| MTFP1        | 0.0001 |
| OR2A20P      | 0.0001 |
| ABCD1        | 0.0001 |
| GSX1         | 0.0001 |
| SSX2IP       | 0.0001 |
| ABCG1        | 0.0001 |
| SP3          | 0.0001 |
| CLGN         | 0.0001 |
| C12orf53     | 0.0001 |

|              |        |
|--------------|--------|
| VASH2        | 0.0001 |
| PLEKHA5      | 0.0001 |
| CPNE6        | 0.0001 |
| ABHD16A      | 0.0001 |
| PRPS1L1      | 0.0001 |
| FOLR1        | 0.0001 |
| RPTN         | 0.0001 |
| ATP6V1H      | 0.0001 |
| HELQ         | 0.0001 |
| LOC200261    | 0.0001 |
| ZNF514       | 0.0001 |
| GIGYF1       | 0.0001 |
| TMEM200B     | 0.0001 |
| LOC283588    | 0.0001 |
| PLRG1        | 0.0001 |
| HEPN1        | 0.0001 |
| TCFL5        | 0.0001 |
| LRP1B        | 0.0001 |
| CDC42EP3     | 0.0001 |
| NSMCE2       | 0.0001 |
| ZCRB1        | 0.0001 |
| UBA52        | 0.0001 |
| KRT25        | 0.0001 |
| MYEF2        | 0.0001 |
| YWHAZ        | 0.0001 |
| SFMBT1       | 0.0001 |
| LOC100506066 | 0.0001 |
| BDNF         | 0.0001 |
| GHRLOS2      | 0.0001 |
| SLC6A3       | 0.0001 |
| LOC100506027 | 0.0001 |
| ACTL6A       | 0.0001 |
| WNT16        | 0.0001 |
| C5orf38      | 0.0001 |
| SORCS2       | 0.0001 |
| TMEM59L      | 0.0001 |
| ARHGEF10     | 0.0001 |
| TPTE2P1      | 0.0001 |
| COMMD1       | 0.0001 |
| ATP6V1A      | 0.0001 |
| CAV3         | 0.0001 |
| PLA2G2F      | 0.0001 |
| KBTBD3       | 0.0001 |
| ZNF428       | 0.0001 |
| H2AFJ        | 0.0001 |
| ZMAT3        | 0.0001 |

|           |        |
|-----------|--------|
| SH3BP5L   | 0.0001 |
| SSH2      | 0.0001 |
| GTF3C4    | 0.0001 |
| TNNI3     | 0.0001 |
| GAS2L1    | 0.0001 |
| SEMA3E    | 0.0001 |
| PLA2G4D   | 0.0001 |
| LOC145783 | 0.0001 |
| C3orf78   | 0.0001 |
| SLC30A7   | 0.0001 |
| IL18RAP   | 0.0001 |
| SCGN      | 0.0001 |
| ARL15     | 0.0001 |
| TMEM123   | 0.0001 |
| DDAH1     | 0.0001 |
| C6orf62   | 0.0001 |
| CBLN3     | 0.0001 |
| LHPP      | 0.0001 |
| TRMT112   | 0.0001 |
| HINT1     | 0.0001 |
| TRAPPC1   | 0.0001 |
| MAPK8IP3  | 0.0001 |
| TMSB15A   | 0.0001 |
| MMP1      | 0.0001 |
| CDC20B    | 0.0001 |
| N6AMT2    | 0.0001 |
| RALGAPA2  | 0.0001 |
| ORAI3     | 0.0001 |
| ST18      | 0.0001 |
| UTP23     | 0.0001 |
| SIRT4     | 0.0001 |
| SLC17A8   | 0.0001 |
| MAST4     | 0.0001 |
| SWT1      | 0.0001 |
| DCTN6     | 0.0001 |
| FAM84A    | 0.0001 |
| PLA2G12B  | 0.0001 |
| TXNDC16   | 0.0001 |
| SNAP29    | 0.0001 |
| PTGR1     | 0.0001 |
| SP110     | 0.0001 |
| CCL4      | 0.0001 |
| VNN3      | 0.0001 |
| C7orf70   | 0.0001 |
| IL1R2     | 0.0001 |
| DCLRE1C   | 0.0001 |



|              |        |
|--------------|--------|
| FAM173B      | 0.0001 |
| RPL5         | 0.0001 |
| NUDT13       | 0.0001 |
| MMP23B       | 0.0001 |
| LINC00161    | 0.0001 |
| NHP2L1       | 0.0001 |
| TTPA         | 0.0001 |
| PTS          | 0.0001 |
| SPACA4       | 0.0001 |
| GPSM1        | 0.0001 |
| IFNA10       | 0.0001 |
| BET1L        | 0.0001 |
| THOC4        | 0.0001 |
| TMEM203      | 0.0001 |
| MGC39584     | 0.0001 |
| ZNF434       | 0.0001 |
| C18orf1      | 0.0001 |
| OTOL1        | 0.0001 |
| UPK1A        | 0.0001 |
| UCA1         | 0.0001 |
| KAT6B        | 0.0001 |
| LILRA1       | 0.0001 |
| TCTE1        | 0.0001 |
| HLA-DRB3     | 0.0001 |
| CACNG2       | 0.0001 |
| FBXO32       | 0.0001 |
| OR8G2        | 0.0001 |
| SCARF1       | 0.0001 |
| FSD1L        | 0.0001 |
| TTYH2        | 0.0001 |
| TCN2         | 0.0001 |
| ARHGAP31     | 0.0001 |
| USP9Y        | 0.0001 |
| RANBP3       | 0.0001 |
| LOC100652886 | 0.0001 |
| CT47A11      | 0.0001 |
| PRSS12       | 0.0001 |
| SEH1L        | 0.0001 |
| SLC43A3      | 0.0001 |
| UBE4B        | 0.0001 |
| LOC284412    | 0.0001 |
| C9orf3       | 0.0001 |
| ENTPD1       | 0.0001 |
| TWF2         | 0.0001 |
| HESX1        | 0.0001 |
| DTHD1        | 0.0001 |

|              |        |
|--------------|--------|
| ANKH         | 0.0001 |
| LOC100289230 | 0.0001 |
| RAB37        | 0.0001 |
| LOC390940    | 0.0001 |
| EPB41L3      | 0.0001 |
| LINC00474    | 0.0001 |
| MRPS22       | 0.0001 |
| TRAF3IP1     | 0.0001 |
| METTL1       | 0.0001 |
| BCAN         | 0.0001 |
| GREM1        | 0.0001 |
| FANCI        | 0.0001 |
| NGDN         | 0.0001 |
| MPDZ         | 0.0001 |
| LILRP2       | 0.0001 |
| KHDC1        | 0.0001 |
| STEAP3       | 0.0001 |
| OXSM         | 0.0001 |
| ENG          | 0.0001 |
| PNPLA1       | 0.0001 |
| PYCR2        | 0.0001 |
| FKBP3        | 0.0001 |
| NT5M         | 0.0001 |
| KCNC2        | 0.0001 |
| AHI1         | 0.0001 |
| MLLT6        | 0.0001 |
| RGS17        | 0.0001 |
| CCDC71       | 0.0001 |
| COG3         | 0.0001 |
| OR6K2        | 0.0001 |
| OGT          | 0.0001 |
| LOC100129516 | 0.0001 |
| IGFBP5       | 0.0001 |
| SYNJ2        | 0.0001 |
| CTNS         | 0.0001 |
| ZNF451       | 0.0001 |
| TNFRSF8      | 0.0001 |
| ZBTB32       | 0.0001 |
| EPS8L3       | 0.0001 |
| C19orf38     | 0.0001 |
| ANKRD13C     | 0.0001 |
| KRTAP4-11    | 0.0001 |
| PDCD6IP      | 0.0001 |
| CASP7        | 0.0001 |
| C10orf11     | 0.0001 |
| HRC          | 0.0001 |

|           |        |
|-----------|--------|
| ABHD3     | 0.0001 |
| AKAP13    | 0.0001 |
| MIPOL1    | 0.0001 |
| PTH1R     | 0.0001 |
| PRX       | 0.0001 |
| LOC284998 | 0.0001 |
| PKHD1L1   | 0.0001 |
| DGKG      | 0.0001 |
| CTAGE6P   | 0.0001 |
| UBR4      | 0.0001 |
| AP3S1     | 0.0001 |
| CCDC90B   | 0.0001 |
| KRTDAP    | 0.0001 |
| MFSD8     | 0.0001 |
| ZBTB41    | 0.0001 |
| SEMA4B    | 0.0001 |
| GORAB     | 0.0001 |
| ZNF563    | 0.0001 |
| TMEM132A  | 0.0001 |
| VSIG1     | 0.0001 |
| ANO9      | 0.0001 |
| MMP20     | 0.0001 |
| ACCN4     | 0.0001 |
| LOC643355 | 0.0001 |
| NHS       | 0.0001 |
| CCL1      | 0.0001 |
| GTF2H3    | 0.0001 |
| DNAJC5B   | 0.0001 |
| MRPL44    | 0.0001 |
| RMND5B    | 0.0001 |
| ZNHIT1    | 0.0001 |
| ATP2B4    | 0.0001 |
| LINC00304 | 0.0001 |
| VNN1      | 0.0001 |
| GLT8D1    | 0.0001 |
| VKORC1L1  | 0.0001 |
| POLR1D    | 0.0001 |
| NDUFB11   | 0.0001 |
| PABPC1L   | 0.0001 |
| COL6A2    | 0.0001 |
| GAK       | 0.0001 |
| RBM43     | 0.0001 |
| ZBTB25    | 0.0001 |
| RP9       | 0.0001 |
| LOC90834  | 0.0001 |
| TBX20     | 0.0001 |

|              |        |
|--------------|--------|
| ARL5A        | 0.0001 |
| TIGD6        | 0.0001 |
| WDR78        | 0.0001 |
| GPR160       | 0.0001 |
| AP1AR        | 0.0001 |
| C6orf141     | 0.0001 |
| C6orf108     | 0.0001 |
| VPS54        | 0.0001 |
| HELLS        | 0.0001 |
| HIST1H4F     | 0.0001 |
| STOML1       | 0.0001 |
| LOC401847    | 0.0001 |
| PLCXD1       | 0.0001 |
| ALG14        | 0.0001 |
| CYP19A1      | 0.0001 |
| LOC100505648 | 0.0001 |
| WBSCR17      | 0.0001 |
| CYP27A1      | 0.0001 |
| MMAA         | 0.0001 |
| C2           | 0.0001 |
| AP1G2        | 0.0001 |
| GNAS         | 0.0001 |
| ZDHHC4       | 0.0001 |
| CYP4F12      | 0.0001 |
| TMEM147      | 0.0001 |
| C1QL3        | 0.0001 |
| SLC7A2       | 0.0001 |
| FHL3         | 0.0001 |
| TMEM38A      | 0.0001 |
| NTNG2        | 0.0001 |
| HRCT1        | 0.0001 |
| DBF4B        | 0.0001 |
| ZNF609       | 0.0001 |
| TSNARE1      | 0.0001 |
| C17orf58     | 0.0001 |
| MRPS24       | 0.0001 |
| SLC4A1AP     | 0.0001 |
| ZNF652       | 0.0001 |
| KCNN1        | 0.0001 |
| NNMT         | 0.0001 |
| CASC1        | 0.0001 |
| COL9A3       | 0.0001 |
| NR2E1        | 0.0001 |
| MLANA        | 0.0001 |
| FLJ31485     | 0.0001 |
| CAD          | 0.0001 |

|           |        |
|-----------|--------|
| TBC1D8B   | 0.0001 |
| ZNF786    | 0.0001 |
| C14orf34  | 0.0001 |
| INPPL1    | 0.0001 |
| SCFD1     | 0.0001 |
| CREB3L3   | 0.0001 |
| LRRC55    | 0.0001 |
| PPP1R9A   | 0.0001 |
| CRB3      | 0.0001 |
| FAM9C     | 0.0001 |
| LOC254100 | 0.0001 |
| FAM188B   | 0.0001 |
| SORBS3    | 0.0001 |
| DDI2      | 0.0001 |
| DHRS9     | 0.0001 |
| CLIC3     | 0.0001 |
| DBF4      | 0.0001 |
| KDELR1    | 0.0001 |
| KRTAP4-1  | 0.0001 |
| PPP4R1L   | 0.0001 |
| CC2D1A    | 0.0001 |
| ITK       | 0.0001 |
| FAM110A   | 0.0001 |
| PDE6B     | 0.0001 |
| C7orf40   | 0.0001 |
| MAGI2     | 0.0001 |
| TMEM88    | 0.0001 |
| KHNYN     | 0.0001 |
| NARS      | 0.0001 |
| CLEC5A    | 0.0001 |
| MUC6      | 0.0001 |
| FAM83H    | 0.0001 |
| GALNT4    | 0.0001 |
| MCM3AP    | 0.0001 |
| PGRMC1    | 0.0001 |
| CACNB3    | 0.0001 |
| CRISPLD2  | 0.0001 |
| NBPF9     | 0.0001 |
| FNDC9     | 0.0001 |
| SH3GL3    | 0.0001 |
| SMC5      | 0.0001 |
| DZIP1L    | 0.0001 |
| SRPX      | 0.0001 |
| KIAA1217  | 0.0001 |
| COL17A1   | 0.0001 |
| GON4L     | 0.0001 |

|              |        |
|--------------|--------|
| IGHA1        | 0.0001 |
| GIN3         | 0.0001 |
| MOV10        | 0.0001 |
| TRDN         | 0.0001 |
| CCR9         | 0.0001 |
| TIGIT        | 0.0001 |
| TGS1         | 0.0001 |
| LETM1        | 0.0001 |
| XPO6         | 0.0001 |
| CDC42BPB     | 0.0001 |
| PLEKHA1      | 0.0001 |
| ECE2         | 0.0001 |
| LOC100507486 | 0.0001 |
| FAM89A       | 0.0001 |
| OSGIN2       | 0.0001 |
| RBMY1B       | 0.0001 |
| BCL9L        | 0.0001 |
| C1orf100     | 0.0001 |
| STK16        | 0.0001 |
| YIPF6        | 0.0001 |
| CCNT2        | 0.0001 |
| IFT20        | 0.0001 |
| COMMD9       | 0.0001 |
| CDK5RAP1     | 0.0001 |
| DGKD         | 0.0001 |
| TEPP         | 0.0001 |
| ZNF34        | 0.0001 |
| KIFC1        | 0.0001 |
| ANKRD43      | 0.0001 |
| NKAIN1       | 0.0001 |
| MTHFD2L      | 0.0001 |
| HAUS2        | 0.0001 |
| ABHD14A      | 0.0001 |
| PGLYRP2      | 0.0001 |
| KRT23        | 0.0001 |
| RPS6KB1      | 0.0001 |
| FBXL21       | 0.0001 |
| PLEKHJ1      | 0.0001 |
| SYNGR3       | 0.0001 |
| LRBA         | 0.0001 |
| PIH1D1       | 0.0001 |
| CORT         | 0.0001 |
| OR10R2       | 0.0001 |
| TNKS2        | 0.0001 |
| TMTC1        | 0.0001 |
| UBN1         | 0.0001 |

|              |        |
|--------------|--------|
| C10orf82     | 0.0001 |
| ZFP57        | 0.0001 |
| KIAA0146     | 0.0001 |
| WDR55        | 0.0001 |
| KRTAP12-2    | 0.0001 |
| CD79B        | 0.0001 |
| LXN          | 0.0001 |
| TRIM23       | 0.0001 |
| CCDC63       | 0.0001 |
| LOC81691     | 0.0001 |
| HES5         | 0.0001 |
| MRPL17       | 0.0001 |
| TPT1         | 0.0001 |
| SPR          | 0.0001 |
| C2orf78      | 0.0001 |
| C6orf1       | 0.0001 |
| GPCPD1       | 0.0001 |
| LPPR2        | 0.0001 |
| RBM12        | 0.0001 |
| SLC25A23     | 0.0001 |
| DFNA5        | 0.0001 |
| TAZ          | 0.0001 |
| LOC100506528 | 0.0001 |
| PTPN20B      | 0.0001 |
| E2F1         | 0.0001 |
| POP4         | 0.0001 |
| LOC100507521 | 0.0001 |
| BRMS1L       | 0.0001 |
| INHBE        | 0.0001 |
| RAPGEF6      | 0.0001 |
| ZSCAN30      | 0.0001 |
| CAV1         | 0.0001 |
| IL2          | 0.0001 |
| AFF3         | 0.0001 |
| EMP3         | 0.0001 |
| COL1A1       | 0.0001 |
| STYK1        | 0.0001 |
| CST3         | 0.0001 |
| HOXB13       | 0.0001 |
| COL14A1      | 0.0001 |
| AXDND1       | 0.0001 |
| LOC100289094 | 0.0001 |
| ANAPC13      | 0.0001 |
| FUBP3        | 0.0001 |
| SOX1         | 0.0001 |
| FZD1         | 0.0001 |

|           |        |
|-----------|--------|
| KISS1R    | 0.0001 |
| CCDC28A   | 0.0001 |
| SERPINH1  | 0.0001 |
| SULT4A1   | 0.0001 |
| LOC254559 | 0.0001 |
| FAM22D    | 0.0001 |
| MIA       | 0.0001 |
| HIPK1     | 0.0001 |
| OR1C1     | 0.0001 |
| ZNF343    | 0.0001 |
| CXorf59   | 0.0001 |
| PLAC1     | 0.0001 |
| NKD2      | 0.0001 |
| DONSON    | 0.0001 |
| RHPN1     | 0.0001 |
| SNX17     | 0.0001 |
| DSC1      | 0.0001 |
| STK32A    | 0.0001 |
| SNX7      | 0.0001 |
| C3orf55   | 0.0001 |
| CD40      | 0.0001 |
| SRI       | 0.0001 |
| SETX      | 0.0001 |
| CHIT1     | 0.0001 |
| OXA1L     | 0.0001 |
| PI4K2B    | 0.0001 |
| ZBTB5     | 0.0001 |
| GUCY2GP   | 0.0001 |
| AKT3      | 0.0001 |
| HKDC1     | 0.0001 |
| SLC2A6    | 0.0001 |
| TEX11     | 0.0001 |
| FERMT2    | 0.0001 |
| HNRNPM    | 0.0001 |
| CHRNA1    | 0.0001 |
| GDE1      | 0.0001 |
| FAM181B   | 0.0001 |
| LOC285074 | 0.0001 |
| SULT1E1   | 0.0001 |
| CYB5R4    | 0.0001 |
| THAP4     | 0.0001 |
| PAPOLG    | 0.0001 |
| GSTT1     | 0.0001 |
| REV3L     | 0.0001 |
| KRTAP5-9  | 0.0001 |
| STK32C    | 0.0001 |



|           |        |
|-----------|--------|
| UQCRB     | 0.0001 |
| OR4K17    | 0.0001 |
| CDH18     | 0.0001 |
| AMH       | 0.0001 |
| DQX1      | 0.0001 |
| FAM46A    | 0.0001 |
| C6orf195  | 0.0001 |
| DNMBP     | 0.0001 |
| CREB3     | 0.0001 |
| MAP1S     | 0.0001 |
| KRT80     | 0.0001 |
| KCTD11    | 0.0001 |
| C5orf4    | 0.0001 |
| C10orf62  | 0.0001 |
| TDRD6     | 0.0001 |
| LOC654433 | 0.0001 |
| MYCBP2    | 0.0001 |
| COBRA1    | 0.0001 |
| C10orf118 | 0.0001 |
| SLC38A4   | 0.0001 |
| CHEK2     | 0.0001 |
| MEI1      | 0.0001 |
| C10orf26  | 0.0001 |
| ZNF813    | 0.0001 |
| USP38     | 0.0001 |
| DPYSL2    | 0.0001 |
| PARP1     | 0.0001 |
| CHCHD4    | 0.0001 |
| ELK4      | 0.0001 |
| OSGIN1    | 0.0001 |
| SMYD2     | 0.0001 |
| EFHC2     | 0.0001 |
| ABCC12    | 0.0001 |
| ZXDC      | 0.0001 |
| PHIP      | 0.0001 |
| FAM92A3   | 0.0001 |
| EIF6      | 0.0001 |
| SAE1      | 0.0001 |
| MUC8      | 0.0001 |
| C9orf24   | 0.0001 |
| TMOD4     | 0.0001 |
| HRG       | 0.0001 |
| GZMA      | 0.0001 |
| KCNK13    | 0.0001 |
| OMA1      | 0.0001 |
| CTRL      | 0.0001 |

|           |        |
|-----------|--------|
| SLC17A2   | 0.0001 |
| HSD17B11  | 0.0001 |
| SEPW1     | 0.0001 |
| TMSB4Y    | 0.0001 |
| CCDC64B   | 0.0001 |
| VAMP7     | 0.0001 |
| IFNA6     | 0.0001 |
| FAM205A   | 0.0001 |
| UNQ6494   | 0.0001 |
| CRMP1     | 0.0001 |
| CCND1     | 0.0001 |
| ZNF660    | 0.0001 |
| IPPK      | 0.0001 |
| WHAMMP3   | 0.0001 |
| EEFSEC    | 0.0001 |
| SAMM50    | 0.0001 |
| POLA2     | 0.0001 |
| BEST1     | 0.0001 |
| OSTF1     | 0.0001 |
| TMEM139   | 0.0001 |
| STK33     | 0.0001 |
| FLRT2     | 0.0001 |
| SGCZ      | 0.0001 |
| CHMP3     | 0.0001 |
| CCDC90A   | 0.0001 |
| LCE3A     | 0.0001 |
| NSL1      | 0.0001 |
| FNDC3A    | 0.0001 |
| FAM174B   | 0.0001 |
| GTF2H1    | 0.0001 |
| HSP90AA1  | 0.0001 |
| NBPF1     | 0.0001 |
| LOC389493 | 0.0001 |
| FASN      | 0.0001 |
| BNC2      | 0.0001 |
| SERPINB4  | 0.0001 |
| ADH1B     | 0.0001 |
| EPB41L4B  | 0.0001 |
| ERV3-2    | 0.0001 |
| PLD5      | 0.0001 |
| RARS2     | 0.0001 |
| BTN2A3P   | 0.0001 |
| ZRANB1    | 0.0001 |
| PARG      | 0.0001 |
| LZTS2     | 0.0001 |
| NUDT19    | 0.0001 |

|              |        |
|--------------|--------|
| GRIN2A       | 0.0001 |
| PSMC3IP      | 0.0001 |
| LOC100132147 | 0.0001 |
| RAD50        | 0.0001 |
| PRM2         | 0.0001 |
| TMEM182      | 0.0001 |
| NME5         | 0.0001 |
| ATPAF2       | 0.0001 |
| ACTR3B       | 0.0001 |
| SNX25        | 0.0001 |
| PMAIP1       | 0.0001 |
| UGT1A6       | 0.0001 |
| PDE7B        | 0.0001 |
| U2SURP       | 0.0001 |
| PLK2         | 0.0001 |
| LOC158402    | 0.0001 |
| VPS13A       | 0.0001 |
| LOC100130331 | 0.0001 |
| RCAN1        | 0.0001 |
| RPL18        | 0.0001 |
| BRP44L       | 0.0001 |
| FCHO2        | 0.0001 |
| DEF6         | 0.0001 |
| COG4         | 0.0001 |
| LAYN         | 0.0001 |
| VPS52        | 0.0001 |
| ANKRD35      | 0.0001 |
| LTA4H        | 0.0001 |
| CNP          | 0.0001 |
| EIF2B1       | 0.0001 |
| TRIT1        | 0.0001 |
| C17orf59     | 0.0001 |
| MED4         | 0.0001 |
| EDDM3B       | 0.0001 |
| MYLPF        | 0.0001 |
| SLC25A44     | 0.0001 |
| MAT1A        | 0.0001 |
| SLC1A5       | 0.0001 |
| ITFG3        | 0.0001 |
| GPBP1        | 0.0001 |
| FARS2        | 0.0001 |
| CASK         | 0.0001 |
| CASKIN2      | 0.0001 |
| LOC151009    | 0.0001 |
| LHX1         | 0.0001 |
| MAOA         | 0.0001 |

|              |        |
|--------------|--------|
| COX10        | 0.0001 |
| LOC100506229 | 0.0001 |
| NPW          | 0.0001 |
| PCDHAC2      | 0.0001 |
| SFTPB        | 0.0001 |
| LARP6        | 0.0001 |
| RPL35        | 0.0001 |
| ISL1         | 0.0001 |
| EIF4G1       | 0.0001 |
| ZFY          | 0.0001 |
| WDR59        | 0.0001 |
| OSBPL6       | 0.0001 |
| LOC100505592 | 0.0001 |
| TRIM54       | 0.0001 |
| LBH          | 0.0001 |
| PLAGL1       | 0.0001 |
| PLXNA4       | 0.0001 |
| ANK3         | 0.0001 |
| VSTM2A       | 0.0001 |
| CCDC14       | 0.0001 |
| TECPR1       | 0.0001 |
| ASB12        | 0.0001 |
| CNOT7        | 0.0001 |
| ABCA10       | 0.0001 |
| MID1         | 0.0001 |
| LOC100506161 | 0.0001 |
| PPIF         | 0.0001 |
| ABCG2        | 0.0001 |
| IGBP1        | 0.0001 |
| ESR2         | 0.0001 |
| MTERF        | 0.0001 |
| PDIA4        | 0.0001 |
| CRHBP        | 0.0001 |
| LRP2         | 0.0001 |
| FAM78A       | 0.0001 |
| CSRP3        | 0.0001 |
| TFAP2D       | 0.0001 |
| ESYT2        | 0.0001 |
| PCSK9        | 0.0001 |
| HSPD1        | 0.0001 |
| TXNL1        | 0.0001 |
| HNRNPC       | 0.0001 |
| SLC35D3      | 0.0001 |
| SLC5A11      | 0.0001 |
| INVS         | 0.0001 |
| METTTL21C    | 0.0001 |

|              |        |
|--------------|--------|
| ARHGEF25     | 0.0001 |
| FAM91A1      | 0.0001 |
| ADAMTS7      | 0.0001 |
| ACCS         | 0.0001 |
| PDE6D        | 0.0001 |
| MKL2         | 0.0001 |
| PCDHB7       | 0.0001 |
| C20orf20     | 0.0001 |
| LYRM2        | 0.0001 |
| PNMA5        | 0.0001 |
| PLCD3        | 0.0001 |
| SEMA6D       | 0.0001 |
| LOR          | 0.0001 |
| ST6GALNAC4   | 0.0001 |
| NEMF         | 0.0001 |
| CREM         | 0.0001 |
| INHBA        | 0.0001 |
| TBX4         | 0.0001 |
| BMS1P1       | 0.0001 |
| GPS1         | 0.0001 |
| FAM48A       | 0.0001 |
| HIST1H4C     | 0.0001 |
| ALMS1        | 0.0001 |
| TMEM218      | 0.0001 |
| ATP6V0D2     | 0.0001 |
| RAD51B       | 0.0001 |
| LIPI         | 0.0001 |
| MAD2L1       | 0.0001 |
| ZC3H14       | 0.0001 |
| ATP6V1G1     | 0.0001 |
| LOC100508233 | 0.0001 |
| ZNF665       | 0.0001 |
| TMIGD2       | 0.0001 |
| AGAP3        | 0.0001 |
| EFNA2        | 0.0001 |
| MPZL1        | 0.0001 |
| SIAH3        | 0.0001 |
| NEFH         | 0.0001 |
| MAST4-AS1    | 0.0001 |
| KIF2B        | 0.0001 |
| RUNDC3A      | 0.0001 |
| SOBP         | 0.0001 |
| SOCS7        | 0.0001 |
| TERF1        | 0.0001 |
| FREM3        | 0.0001 |
| IGKV1D-8     | 0.0001 |

|              |        |
|--------------|--------|
| PDE4B        | 0.0001 |
| CPO          | 0.0001 |
| SLC34A1      | 0.0001 |
| FAM104A      | 0.0001 |
| GAS2L3       | 0.0001 |
| A2LD1        | 0.0001 |
| EIF4EBP1     | 0.0001 |
| LOC100507033 | 0.0001 |
| CKLF-CMTM1   | 0.0001 |
| PDCD6        | 0.0001 |
| SEPX1        | 0.0001 |
| KIAA1109     | 0.0001 |
| SSFA2        | 0.0001 |
| MYCL1        | 0.0001 |
| TTR          | 0.0001 |
| INPP4A       | 0.0001 |
| TAF11        | 0.0001 |
| LOC100129250 | 0.0001 |
| HOXC10       | 0.0001 |
| SSB          | 0.0001 |
| HYOU1        | 0.0001 |
| ATOH8        | 0.0001 |
| FAM115A      | 0.0001 |
| ATP5D        | 0.0001 |
| PGLYRP1      | 0.0001 |
| TATDN2       | 0.0001 |
| NCOA2        | 0.0001 |
| LPO          | 0.0001 |
| SHC1         | 0.0001 |
| HSPA1A       | 0.0001 |
| PPP2CB       | 0.0001 |
| C19orf70     | 0.0001 |
| GALNT3       | 0.0001 |
| LOC100510011 | 0.0001 |
| C1QTNF1      | 0.0001 |
| OTOR         | 0.0001 |
| GUCY1A3      | 0.0001 |
| LOC286272    | 0.0001 |
| FBXO21       | 0.0001 |
| FAM5C        | 0.0001 |
| AHSP         | 0.0001 |
| MAPKAP1      | 0.0001 |
| CKB          | 0.0001 |
| USP3         | 0.0001 |
| SCP2         | 0.0001 |
| CHD1L        | 0.0001 |

|              |        |
|--------------|--------|
| ZNF264       | 0.0001 |
| BEX2         | 0.0001 |
| C6orf154     | 0.0001 |
| MTMR10       | 0.0001 |
| PDYN         | 0.0001 |
| JAK2         | 0.0001 |
| NIPA2        | 0.0001 |
| FLJ45248     | 0.0001 |
| RREB1        | 0.0001 |
| ATHL1        | 0.0001 |
| PRKCDBP      | 0.0001 |
| EDN2         | 0.0001 |
| PGAM5        | 0.0001 |
| FBXL4        | 0.0001 |
| C1orf35      | 0.0001 |
| MTA2         | 0.0001 |
| H2AFZ        | 0.0001 |
| YWHAH        | 0.0001 |
| SUMO1        | 0.0001 |
| MTO1         | 0.0001 |
| TSPO         | 0.0001 |
| LOC100505717 | 0.0001 |
| GTPBP2       | 0.0001 |
| AKR1C3       | 0.0001 |
| METAP1       | 0.0001 |
| CCT6B        | 0.0001 |
| TIGD1        | 0.0001 |
| SOX30        | 0.0001 |
| LRRIQ3       | 0.0001 |
| GGH          | 0.0001 |
| ZSCAN12P1    | 0.0001 |
| IPO8         | 0.0001 |
| NBN          | 0.0001 |
| SPATA17      | 0.0001 |
| LMAN1        | 0.0001 |
| AGXT2L1      | 0.0001 |
| ZNF506       | 0.0001 |
| OR4D5        | 0.0001 |
| NAA16        | 0.0001 |
| C11orf40     | 0.0001 |
| FAM189A1     | 0.0001 |
| PAX2         | 0.0001 |
| CLDN18       | 0.0001 |
| AVPR1A       | 0.0001 |
| RANBP9       | 0.0001 |
| RAB42        | 0.0001 |

|              |        |
|--------------|--------|
| MLLT11       | 0.0001 |
| LOC652276    | 0.0001 |
| VTCN1        | 0.0001 |
| POM121       | 0.0001 |
| ALDH1A1      | 0.0001 |
| TECRL        | 0.0001 |
| MLF1IP       | 0.0001 |
| SCLT1        | 0.0001 |
| ACO1         | 0.0001 |
| HABP4        | 0.0001 |
| GPR171       | 0.0001 |
| FAM161B      | 0.0001 |
| ZFX          | 0.0001 |
| SLC41A2      | 0.0001 |
| PRSS27       | 0.0001 |
| CLTB         | 0.0001 |
| RFX5         | 0.0001 |
| CARD16       | 0.0001 |
| PKD1P1       | 0.0001 |
| ZNF554       | 0.0001 |
| LOC100134167 | 0.0001 |
| LOC100289058 | 0.0001 |
| PNLIPRP1     | 0.0001 |
| HTATIP2      | 0.0001 |
| NR2C2AP      | 0.0001 |
| KRT18P55     | 0.0001 |
| CYP7B1       | 0.0001 |
| OSBPL2       | 0.0001 |
| BRD7         | 0.0001 |
| DNASE1L3     | 0.0001 |
| GPR37L1      | 0.0001 |
| TIPIN        | 0.0001 |
| TSPY26P      | 0.0001 |
| SLC25A6      | 0.0001 |
| JAZF1        | 0.0001 |
| CCDC39       | 0.0001 |
| EFNB2        | 0.0001 |
| MFSD9        | 0.0001 |
| PRKACB       | 0.0001 |
| DLK2         | 0.0001 |
| CBX8         | 0.0001 |
| FAM165B      | 0.0001 |
| FAM96A       | 0.0001 |
| TET3         | 0.0001 |
| PAN2         | 0.0001 |
| LOC440356    | 0.0001 |



|              |        |
|--------------|--------|
| ERVW-1       | 0.0001 |
| CCDC6        | 0.0001 |
| LGALS13      | 0.0001 |
| LOC440330    | 0.0001 |
| CLIC2        | 0.0001 |
| PVT1         | 0.0001 |
| R3HDM2       | 0.0001 |
| PLCB1        | 0.0001 |
| ANKRD30A     | 0.0001 |
| PAQR4        | 0.0001 |
| USP51        | 0.0001 |
| BFSP2        | 0.0001 |
| RALGDS       | 0.0001 |
| MED16        | 0.0001 |
| MYH3         | 0.0001 |
| SFT2D3       | 0.0001 |
| MOK          | 0.0001 |
| MCOLN2       | 0.0001 |
| C9orf95      | 0.0001 |
| C2orf56      | 0.0001 |
| PHF14        | 0.0001 |
| AQP4         | 0.0001 |
| FABP5        | 0.0001 |
| BCDIN3D      | 0.0001 |
| RBM18        | 0.0001 |
| PFDN1        | 0.0001 |
| EPPK1        | 0.0001 |
| USP18        | 0.0001 |
| UQCC         | 0.0001 |
| FSTL5        | 0.0001 |
| LOC100505915 | 0.0001 |
| TM9SF2       | 0.0001 |
| FAM65A       | 0.0001 |
| SLC24A6      | 0.0001 |
| NUAK2        | 0.0001 |
| C13orf27     | 0.0001 |
| KIAA1715     | 0.0001 |
| ZNF680       | 0.0001 |
| LCLAT1       | 0.0001 |
| MALT1        | 0.0001 |
| MAGEL2       | 0.0001 |
| RNF24        | 0.0001 |
| POLRMT       | 0.0001 |
| UTP14A       | 0.0001 |
| LOC388882    | 0.0001 |
| LHX4         | 0.0001 |

|             |        |
|-------------|--------|
| DZIP1       | 0.0001 |
| PIM2        | 0.0001 |
| ATXN7L3     | 0.0001 |
| CYLC1       | 0.0001 |
| PTPRS       | 0.0001 |
| SLC2A4      | 0.0001 |
| NDUFV1      | 0.0001 |
| TTC37       | 0.0001 |
| FCHSD1      | 0.0001 |
| KIAA1984    | 0.0001 |
| CDAN1       | 0.0001 |
| C8orf45     | 0.0001 |
| ZCCHC9      | 0.0001 |
| ZNF236      | 0.0001 |
| PGGT1B      | 0.0001 |
| HRSP12      | 0.0001 |
| TAF2        | 0.0001 |
| MRPS14      | 0.0001 |
| TACC2       | 0.0001 |
| LCE3B       | 0.0001 |
| FASLG       | 0.0001 |
| KIRREL3-AS3 | 0.0001 |
| CDC14B      | 0.0001 |
| DDX39B      | 0.0001 |
| UBR3        | 0.0001 |
| LDLRAD1     | 0.0001 |
| LOC653160   | 0.0001 |
| HIST1H4H    | 0.0001 |
| OR7E47P     | 0.0001 |
| OPRL1       | 0.0001 |
| CHMP7       | 0.0001 |
| BEAN1       | 0.0001 |
| LOC92659    | 0.0001 |
| GPR144      | 0.0001 |
| FAM183B     | 0.0001 |
| USP32P2     | 0.0001 |
| SRRT        | 0.0001 |
| AFG3L1P     | 0.0001 |
| ATPAF1-AS1  | 0.0001 |
| PLA2G4C     | 0.0001 |
| RNF182      | 0.0001 |
| BCOR        | 0.0001 |
| PLAU        | 0.0001 |
| PHACTR2     | 0.0001 |
| ZRSR2       | 0.0001 |
| NBPF3       | 0.0001 |

|              |        |
|--------------|--------|
| LOC100652840 | 0.0001 |
| AHSA1        | 0.0001 |
| CDK6         | 0.0001 |
| UBE2A        | 0.0001 |
| MFN1         | 0.0001 |
| REL          | 0.0001 |
| CXXC5        | 0.0001 |
| GDAP2        | 0.0001 |
| MC1R         | 0.0001 |
| LOC100653218 | 0.0001 |
| DUSP22       | 0.0001 |
| ITGA1        | 0.0001 |
| HDAC9        | 0.0001 |
| GJB5         | 0.0001 |
| DAPL1        | 0.0001 |
| IRS4         | 0.0001 |
| LOC100505940 | 0.0001 |
| DAG1         | 0.0001 |
| RLF          | 0.0001 |
| RRM1         | 0.0001 |
| TRMT61A      | 0.0001 |
| MAST1        | 0.0001 |
| MTPN         | 0.0001 |
| FAM190B      | 0.0001 |
| PCID2        | 0.0001 |
| GSX2         | 0.0001 |
| GPR50        | 0.0001 |
| PTPN11       | 0.0001 |
| CSPG4P1Y     | 0.0001 |
| BCAR1        | 0.0001 |
| FIG4         | 0.0001 |
| ST3GAL3      | 0.0001 |
| RAB5C        | 0.0001 |
| INO80B       | 0.0001 |
| FCF1         | 0.0001 |
| TUSC5        | 0.0001 |
| CASP14       | 0.0001 |
| RAB32        | 0.0001 |
| RIPK4        | 0.0001 |
| LINC00314    | 0.0001 |
| RSPO1        | 0.0001 |
| KLF10        | 0.0001 |
| LOC150197    | 0.0001 |
| RNF122       | 0.0001 |
| RHBDL2       | 0.0001 |
| IZUMO4       | 0.0001 |

|              |        |
|--------------|--------|
| STX3         | 0.0001 |
| RIOK3        | 0.0001 |
| SLC35C1      | 0.0001 |
| C4orf43      | 0.0001 |
| DNAH9        | 0.0001 |
| TPO          | 0.0001 |
| NCAPH        | 0.0001 |
| NEK9         | 0.0001 |
| TLR5         | 0.0001 |
| LINC00221    | 0.0001 |
| PIGR         | 0.0001 |
| NBEAL1       | 0.0001 |
| LARP1        | 0.0001 |
| ARHGEF18     | 0.0001 |
| PSME1        | 0.0001 |
| DTNBP1       | 0.0001 |
| IL17C        | 0.0001 |
| EIF2B2       | 0.0001 |
| SUMO1P3      | 0.0001 |
| GALR2        | 0.0001 |
| HSPE1        | 0.0001 |
| GABRR3       | 0.0001 |
| CPSF6        | 0.0001 |
| NME4         | 0.0001 |
| PROKR1       | 0.0001 |
| MYCBP        | 0.0001 |
| CMC1         | 0.0001 |
| FAM133A      | 0.0001 |
| PKP1         | 0.0001 |
| CDK2         | 0.0001 |
| SORBS1       | 0.0001 |
| SHISA4       | 0.0001 |
| MLEC         | 0.0001 |
| CSF3R        | 0.0001 |
| KCNMB4       | 0.0001 |
| PEG10        | 0.0001 |
| EIF2C2       | 0.0001 |
| LRRC32       | 0.0001 |
| ITPA         | 0.0001 |
| B2M          | 0.0001 |
| CH25H        | 0.0001 |
| CHM          | 0.0001 |
| FFAR1        | 0.0001 |
| LOC728705    | 0.0001 |
| BIRC7        | 0.0001 |
| LOC100505851 | 0.0001 |

|              |        |
|--------------|--------|
| KSR2         | 0.0001 |
| GAR1         | 0.0001 |
| PPP1R16A     | 0.0001 |
| USP33        | 0.0001 |
| LOC100506699 | 0.0001 |
| MEGF11       | 0.0001 |
| MKRN7P       | 0.0001 |
| FOXC1        | 0.0001 |
| ERP29        | 0.0001 |
| CD248        | 0.0001 |
| ZDHHC19      | 0.0001 |
| METTL23      | 0.0001 |
| SGMS2        | 0.0001 |
| MS4A6A       | 0.0001 |
| LINC00310    | 0.0001 |
| TCTA         | 0.0001 |
| HSF4         | 0.0001 |
| RNMT         | 0.0001 |
| MAGI3        | 0.0001 |
| EFEMP2       | 0.0001 |
| GIMAP5       | 0.0001 |
| KIAA1324L    | 0.0001 |
| CD163L1      | 0.0001 |
| SGSM1        | 0.0001 |
| HTR2C        | 0.0001 |
| PCNXL2       | 0.0001 |
| RBM11        | 0.0001 |
| AKAP9        | 0.0001 |
| LOC100653338 | 0.0001 |
| RASSF2       | 0.0001 |
| MRPS21       | 0.0001 |
| ANKRD33      | 0.0001 |
| HEBP2        | 0.0001 |
| GFM2         | 0.0001 |
| TMEM200A     | 0.0001 |
| PPP6R1       | 0.0001 |
| RPL10A       | 0.0001 |
| STAT6        | 0.0001 |
| ZNF790       | 0.0001 |
| KLC2         | 0.0001 |
| C6orf118     | 0.0001 |
| SOX17        | 0.0001 |
| FAM126A      | 0.0001 |
| MRPL10       | 0.0001 |
| GUCA1A       | 0.0001 |
| PODN         | 0.0001 |

|              |        |
|--------------|--------|
| C5AR1        | 0.0001 |
| PODXL        | 0.0001 |
| NPFF         | 0.0001 |
| MAGEA2B      | 0.0001 |
| UBASH3A      | 0.0001 |
| ZFYVE9       | 0.0001 |
| FGR          | 0.0001 |
| PATL1        | 0.0001 |
| ZNF610       | 0.0001 |
| CNKSR3       | 0.0001 |
| EME1         | 0.0001 |
| ZNF498       | 0.0001 |
| IFNA4        | 0.0001 |
| TMEM229B     | 0.0001 |
| FAM160B2     | 0.0001 |
| RNF169       | 0.0001 |
| IDUA         | 0.0001 |
| MYO3B        | 0.0001 |
| PKN2         | 0.0001 |
| DCTN3        | 0.0001 |
| DYNLRB1      | 0.0001 |
| SDR16C5      | 0.0001 |
| ZNF212       | 0.0001 |
| TPH1         | 0.0001 |
| SIDT1        | 0.0001 |
| ZMAT5        | 0.0001 |
| KIAA1656     | 0.0001 |
| PIN4         | 0.0001 |
| EIF2B4       | 0.0001 |
| C18orf12     | 0.0001 |
| ORC3         | 0.0001 |
| FBXO3        | 0.0001 |
| KIAA0226L    | 0.0001 |
| TRAF5        | 0.0001 |
| CAMK1        | 0.0001 |
| LOC100507153 | 0.0001 |
| ENPP7        | 0.0001 |
| MYC          | 0.0001 |
| LYZL6        | 0.0001 |
| TMBIM4       | 0.0001 |
| PAQR7        | 0.0001 |
| ZNF510       | 0.0001 |
| HMGCS1       | 0.0001 |
| RAB17        | 0.0001 |
| LOC100505909 | 0.0001 |
| TMPRSS11B    | 0.0001 |

|              |        |
|--------------|--------|
| RXRB         | 0.0001 |
| ADCY1        | 0.0001 |
| FAIM3        | 0.0001 |
| IZUMO2       | 0.0001 |
| SPIN3        | 0.0001 |
| KIAA0754     | 0.0001 |
| GAPT         | 0.0001 |
| AFF4         | 0.0001 |
| FAM184B      | 0.0001 |
| CSRNP1       | 0.0001 |
| BCAS2        | 0.0001 |
| TMEM187      | 0.0001 |
| PDGFRB       | 0.0001 |
| BHLHA15      | 0.0001 |
| LOC100506831 | 0.0001 |
| TSSC1        | 0.0001 |
| KCNK7        | 0.0001 |
| BEX5         | 0.0001 |
| ACTL7A       | 0.0001 |
| UBE2Q2P1     | 0.0001 |
| TRA2A        | 0.0001 |
| MAP1LC3A     | 0.0001 |
| PACSIN2      | 0.0001 |
| ZNF845       | 0.0001 |
| PRR3         | 0.0001 |
| LAMB4        | 0.0001 |
| MDM4         | 0.0001 |
| TXNDC11      | 0.0001 |
| LOC440792    | 0.0001 |
| MRPL35       | 0.0001 |
| FOXD2        | 0.0001 |
| C4B          | 0.0001 |
| FAM81B       | 0.0001 |
| C17orf80     | 0.0001 |
| C12orf75     | 0.0001 |
| PHRF1        | 0.0001 |
| LPHN2        | 0.0001 |
| LOC100128175 | 0.0001 |
| MYBPC3       | 0.0001 |
| TP53RK       | 0.0001 |
| MALAT1       | 0.0001 |
| C3orf36      | 0.0001 |
| OTUB2        | 0.0001 |
| CD1D         | 0.0001 |
| GPR157       | 0.0001 |
| MYPOP        | 0.0001 |

|              |        |
|--------------|--------|
| EIF3C        | 0.0001 |
| FCN3         | 0.0001 |
| NETO1        | 0.0001 |
| KRT79        | 0.0001 |
| ISY1         | 0.0001 |
| AFAP1L1      | 0.0001 |
| CAPN1        | 0.0001 |
| NPRL3        | 0.0001 |
| TTC39A       | 0.0001 |
| CLCA2        | 0.0001 |
| EVI5         | 0.0001 |
| ELANE        | 0.0001 |
| TXK          | 0.0001 |
| COX4NB       | 0.0001 |
| CADM2        | 0.0001 |
| PCBP3        | 0.0001 |
| TRIM60       | 0.0001 |
| VCY          | 0.0001 |
| KIF22        | 0.0001 |
| EPS8L2       | 0.0001 |
| IL7R         | 0.0001 |
| ARHGDIG      | 0.0001 |
| NCAM1        | 0.0001 |
| ROPN1L-AS1   | 0.0001 |
| PDK1         | 0.0001 |
| TMF1         | 0.0001 |
| ADCY3        | 0.0001 |
| DERL1        | 0.0001 |
| CCT7         | 0.0001 |
| YIF1A        | 0.0001 |
| NLGN3        | 0.0001 |
| NFYC         | 0.0001 |
| SMPDL3A      | 0.0001 |
| CCDC124      | 0.0001 |
| LOC100131262 | 0.0001 |
| UMPS         | 0.0001 |
| NLGN4X       | 0.0001 |
| UBR7         | 0.0001 |
| PDXDC2P      | 0.0001 |
| TREX2        | 0.0001 |
| CTSH         | 0.0001 |
| PPP2R1A      | 0.0001 |
| LOC100505573 | 0.0001 |
| RNPEP        | 0.0001 |
| PPP1CB       | 0.0001 |
| CLCN7        | 0.0001 |



|              |        |
|--------------|--------|
| IRAK3        | 0.0001 |
| SLC22A24     | 0.0001 |
| TTY21        | 0.0001 |
| LOC100507904 | 0.0001 |
| GPBAR1       | 0.0001 |
| CLEC1A       | 0.0001 |
| RBM12B       | 0.0001 |
| C16orf74     | 0.0001 |
| STK24        | 0.0001 |
| ARIH1        | 0.0001 |
| RSL24D1      | 0.0001 |
| PRKRIP1      | 0.0001 |
| FBXL19-AS1   | 0.0001 |
| HIRA         | 0.0001 |
| SEMA3F       | 0.0001 |
| AVIL         | 0.0001 |
| RIC3         | 0.0001 |
| NUDT16       | 0.0001 |
| STIP1        | 0.0001 |
| C15orf60     | 0.0001 |
| RARRES3      | 0.0001 |
| ZNF282       | 0.0001 |
| KCNN4        | 0.0001 |
| ZNF77        | 0.0001 |
| EPT1         | 0.0001 |
| MYO5C        | 0.0001 |
| GPRIN3       | 0.0001 |
| C2orf49      | 0.0001 |
| ADAMTS8      | 0.0001 |
| DDX55        | 0.0001 |
| FAM35B       | 0.0001 |
| TMEM30B      | 0.0001 |
| GSDMD        | 0.0001 |
| WNT5A        | 0.0001 |
| OR10C1       | 0.0001 |
| C14orf91     | 0.0001 |
| SUSD2        | 0.0001 |
| KLF14        | 0.0001 |
| KLF16        | 0.0001 |
| ASCL3        | 0.0001 |
| TRPC1        | 0.0001 |
| SRSF2        | 0.0001 |
| NTF4         | 0.0001 |
| ZC3H18       | 0.0001 |
| MEF2C        | 0.0001 |
| WDR91        | 0.0001 |

|              |        |
|--------------|--------|
| FECH         | 0.0001 |
| FAM162A      | 0.0001 |
| LOC100128682 | 0.0001 |
| BAG3         | 0.0001 |
| KLRD1        | 0.0001 |
| ABCF2        | 0.0001 |
| ZPBP2        | 0.0001 |
| CLSPN        | 0.0001 |
| UBE2V1       | 0.0001 |
| TTC33        | 0.0001 |
| TBCC         | 0.0001 |
| TMEM176B     | 0.0001 |
| USP1         | 0.0001 |
| KIAA1958     | 0.0001 |
| PEX10        | 0.0001 |
| FJX1         | 0.0001 |
| GRAMD4       | 0.0001 |
| SC5DL        | 0.0001 |
| ROPN1B       | 0.0001 |
| SLC29A3      | 0.0001 |
| ZNF502       | 0.0001 |
| FLJ34690     | 0.0001 |
| C7orf29      | 0.0001 |
| PLAC9        | 0.0001 |
| CD24         | 0.0001 |
| FLJ23865     | 0.0001 |
| DUSP5        | 0.0001 |
| MRGPRD       | 0.0001 |
| DNAJB5       | 0.0001 |
| SCRN2        | 0.0001 |
| FBXL14       | 0.0001 |
| ZYG11A       | 0.0001 |
| SERF1A       | 0.0001 |
| ZNF511       | 0.0001 |
| RAB3D        | 0.0001 |
| TCF23        | 0.0001 |
| C19orf59     | 0.0001 |
| CHKB         | 0.0001 |
| ZFP62        | 0.0001 |
| CHST5        | 0.0001 |
| ABCC2        | 0.0001 |
| PSMG2        | 0.0001 |
| CSTF2        | 0.0001 |
| RTN4RL1      | 0.0001 |
| POLE         | 0.0001 |
| GPRIN1       | 0.0001 |

|              |        |
|--------------|--------|
| RAB15        | 0.0001 |
| UHRF1BP1     | 0.0001 |
| BRD7P3       | 0.0001 |
| SHANK1       | 0.0001 |
| FN3KRP       | 0.0001 |
| LOC158863    | 0.0001 |
| KRT40        | 0.0001 |
| SLC15A2      | 0.0001 |
| NARG2        | 0.0001 |
| FAHD1        | 0.0001 |
| CELA2A       | 0.0001 |
| DHRS4        | 0.0001 |
| PRF1         | 0.0001 |
| WASF1        | 0.0001 |
| EFNA1        | 0.0001 |
| NVL          | 0.0001 |
| ZNF625       | 0.0001 |
| DNAJC4       | 0.0001 |
| TRAPPC2P1    | 0.0001 |
| GSS          | 0.0001 |
| HOXA11-AS1   | 0.0001 |
| SNRNP25      | 0.0001 |
| RSPO3        | 0.0001 |
| DUSP27       | 0.0001 |
| LOC100506029 | 0.0001 |
| EFR3B        | 0.0001 |
| ENO1         | 0.0001 |
| SLC25A5      | 0.0001 |
| RBMX         | 0.0001 |
| ODF3         | 0.0001 |
| TIE1         | 0.0001 |
| SLX4         | 0.0001 |
| RPS6KA5      | 0.0001 |
| LIN37        | 0.0001 |
| TGFBR2       | 0.0001 |
| LOC100290566 | 0.0001 |
| RNF166       | 0.0001 |
| RBM19        | 0.0001 |
| CCDC57       | 0.0001 |
| IL17B        | 0.0001 |
| PCDH11Y      | 0.0001 |
| CMTM8        | 0.0001 |
| B3GALT5      | 0.0001 |
| FZR1         | 0.0001 |
| STEAP2       | 0.0001 |
| ADCK1        | 0.0001 |

|              |        |
|--------------|--------|
| TM2D1        | 0.0001 |
| UCP1         | 0.0001 |
| CNOT6        | 0.0001 |
| MATR3        | 0.0001 |
| LOC100505880 | 0.0001 |
| KIR3DL2      | 0.0001 |
| MACC1        | 0.0001 |
| PPP3CC       | 0.0001 |
| RAB7A        | 0.0001 |
| C22orf40     | 0.0001 |
| CBWD6        | 0.0001 |
| C20orf94     | 0.0001 |
| DAB2IP       | 0.0001 |
| EARS2        | 0.0001 |
| SAMD14       | 0.0001 |
| C10orf32     | 0.0001 |
| CASC3        | 0.0001 |
| EIF3G        | 0.0001 |
| RAB7L1       | 0.0001 |
| PRO2214      | 0.0001 |
| C16orf42     | 0.0001 |
| POLD2        | 0.0001 |
| PCCB         | 0.0001 |
| LOC100506495 | 0.0001 |
| TMEM177      | 0.0001 |
| LARP4        | 0.0001 |
| NDUFS6       | 0.0001 |
| LOC100507160 | 0.0001 |
| NEIL2        | 0.0001 |
| TMEM201      | 0.0001 |
| P2RX6        | 0.0001 |
| SNCA         | 0.0001 |
| BIRC8        | 0.0001 |
| DUSP12       | 0.0001 |
| COX5A        | 0.0001 |
| POLQ         | 0.0001 |
| CDH12        | 0.0001 |
| ZDHHC21      | 0.0001 |
| CLIC5        | 0.0001 |
| CASP6        | 0.0001 |
| PRM3         | 0.0001 |
| PRR18        | 0.0001 |
| OR51G1       | 0.0001 |
| ERC2         | 0.0001 |
| REC8         | 0.0001 |
| ACE2         | 0.0001 |

|              |        |
|--------------|--------|
| HP07349      | 0.0001 |
| NKAP         | 0.0001 |
| MAN1A2       | 0.0001 |
| HLX          | 0.0001 |
| CPVL         | 0.0001 |
| CRIP3        | 0.0001 |
| MTMR8        | 0.0001 |
| LOC100506538 | 0.0001 |
| DIAPH2       | 0.0001 |
| MSX1         | 0.0001 |
| IPO5         | 0.0001 |
| RNF214       | 0.0001 |
| GPR6         | 0.0001 |
| SOD2         | 0.0001 |
| GTF3C6       | 0.0001 |
| DPP3         | 0.0001 |
| LOC283624    | 0.0001 |
| LRRC2        | 0.0001 |
| CS           | 0.0001 |
| UBE2U        | 0.0001 |
| LOC100130741 | 0.0001 |
| HPS6         | 0.0001 |
| SLCO5A1      | 0.0001 |
| LRRC8D       | 0.0001 |
| DNAH2        | 0.0001 |
| HOXD13       | 0.0001 |
| TSPAN5       | 0.0001 |
| BMX          | 0.0001 |
| SCN4B        | 0.0001 |
| LOC100507557 | 0.0001 |
| DPH5         | 0.0001 |
| KIAA0100     | 0.0001 |
| LEMD3        | 0.0001 |
| VASP         | 0.0001 |
| PUS7L        | 0.0001 |
| HOXB9        | 0.0001 |
| FARSB        | 0.0001 |
| RTBDN        | 0.0001 |
| LOC100133319 | 0.0001 |
| POC1B        | 0.0001 |
| MAP3K15      | 0.0001 |
| PPP2R2D      | 0.0001 |
| ZNF485       | 0.0001 |
| RHAG         | 0.0001 |
| LOC100507372 | 0.0001 |
| KIAA0284     | 0.0001 |

|              |        |
|--------------|--------|
| ZNF143       | 0.0001 |
| LOC100506983 | 0.0001 |
| SNHG1        | 0.0001 |
| EMX2         | 0.0001 |
| ACP5         | 0.0001 |
| FKSG29       | 0.0001 |
| UBE2J1       | 0.0001 |
| ATP6AP1L     | 0.0001 |
| MIRLET7BHG   | 0.0001 |
| CNKSR1       | 0.0001 |
| NDUFS5       | 0.0001 |
| LOC401127    | 0.0001 |
| CYP4Z1       | 0.0001 |
| NRG3         | 0.0001 |
| OR52A1       | 0.0001 |
| KRTAP3-2     | 0.0001 |
| WHSC1        | 0.0001 |
| SH2D3C       | 0.0001 |
| UBAP1        | 0.0001 |
| PVRL3        | 0.0001 |
| TACC3        | 0.0001 |
| IL17F        | 0.0001 |
| SLC6A14      | 0.0001 |
| TRIM9        | 0.0001 |
| PLP1         | 0.0001 |
| AAK1         | 0.0001 |
| UGT3A1       | 0.0001 |
| FBXO31       | 0.0001 |
| GALT         | 0.0001 |
| CSNK2A2      | 0.0001 |
| EEA1         | 0.0001 |
| RPL13A       | 0.0001 |
| CD53         | 0.0001 |
| TSPAN6       | 0.0001 |
| CYP2R1       | 0.0001 |
| EPHX3        | 0.0001 |
| ATP6V1D      | 0.0001 |
| CPSF1        | 0.0001 |
| LOC442421    | 0.0001 |
| METTL11A     | 0.0001 |
| COQ2         | 0.0001 |
| LOC100132735 | 0.0001 |
| ATF6         | 0.0001 |
| PITPNM2      | 0.0001 |
| RDH10        | 0.0001 |
| SMYD4        | 0.0001 |

|              |        |
|--------------|--------|
| UHRF1BP1L    | 0.0001 |
| HOXA2        | 0.0001 |
| COPZ1        | 0.0001 |
| SHCBP1       | 0.0001 |
| GNB5         | 0.0001 |
| AZIN1        | 0.0001 |
| ALDH3A1      | 0.0001 |
| DDX24        | 0.0001 |
| EIF3J        | 0.0001 |
| SLC6A16      | 0.0001 |
| SLC19A3      | 0.0001 |
| PADI1        | 0.0001 |
| RAB27A       | 0.0001 |
| SPRYD4       | 0.0001 |
| MAGEB6       | 0.0001 |
| SEC61A2      | 0.0001 |
| RBM5         | 0.0001 |
| PAX7         | 0.0001 |
| DUSP13       | 0.0001 |
| TNFRSF11A    | 0.0001 |
| CACNA1E      | 0.0001 |
| GIMAP7       | 0.0001 |
| MTHFD1L      | 0.0001 |
| ZNF695       | 0.0001 |
| WNT9B        | 0.0001 |
| ADAP1        | 0.0001 |
| SPAG4        | 0.0001 |
| ZNF582       | 0.0001 |
| TSSK2        | 0.0001 |
| AATF         | 0.0001 |
| RIMS4        | 0.0001 |
| LOC100133130 | 0.0001 |
| SEC14L3      | 0.0001 |
| SLC25A41     | 0.0001 |
| ALS2         | 0.0001 |
| TAL1         | 0.0001 |
| PFKP         | 0.0001 |
| ODF3L2       | 0.0001 |
| LOC100131298 | 0.0001 |
| LOC100507094 | 0.0001 |
| VEZT         | 0.0001 |
| OVOL2        | 0.0001 |
| TBX10        | 0.0001 |
| SLC9A5       | 0.0001 |
| SCAMPER      | 0.0001 |
| ZNF613       | 0.0001 |

|              |        |
|--------------|--------|
| BDH2         | 0.0001 |
| GRID2        | 0.0001 |
| KCNAB1       | 0.0001 |
| NUP43        | 0.0001 |
| RPS5         | 0.0001 |
| HDHD1        | 0.0001 |
| RACGAP1P     | 0.0001 |
| AGBL4        | 0.0001 |
| LRRC23       | 0.0001 |
| NPCDR1       | 0.0001 |
| BCL2A1       | 0.0001 |
| SRPK2        | 0.0001 |
| GVINP1       | 0.0001 |
| AP1S1        | 0.0001 |
| FAM71E1      | 0.0001 |
| ADAMTS6      | 0.0001 |
| SMU1         | 0.0001 |
| AGR2         | 0.0001 |
| CHRNA4       | 0.0001 |
| ZC3H12D      | 0.0001 |
| SFXN5        | 0.0001 |
| MUC4         | 0.0001 |
| PSG3         | 0.0001 |
| ZNF823       | 0.0001 |
| PKN1         | 0.0001 |
| CTNNA3       | 0.0001 |
| SLC38A1      | 0.0001 |
| RFWD3        | 0.0001 |
| XAGE5        | 0.0001 |
| LOC100130654 | 0.0001 |
| NAB2         | 0.0001 |
| SARNP        | 0.0001 |
| HINFP        | 0.0001 |
| PEX12        | 0.0001 |
| SLC4A1       | 0.0001 |
| TARDBP       | 0.0001 |
| PPP2R5A      | 0.0001 |
| MRPS10       | 0.0001 |
| LOC728763    | 0.0001 |
| ZC3H7B       | 0.0001 |
| HS3ST1       | 0.0001 |
| SHMT1        | 0.0001 |
| KLHL11       | 0.0001 |
| LOC440900    | 0.0001 |
| FBXW9        | 0.0001 |
| ZMYND8       | 0.0001 |



|              |        |
|--------------|--------|
| HIST1H3C     | 0.0001 |
| AKTIP        | 0.0001 |
| SQRDL        | 0.0001 |
| MIS18A       | 0.0001 |
| ARMC1        | 0.0001 |
| ZNF512       | 0.0001 |
| NRAS         | 0.0001 |
| RBM47        | 0.0001 |
| SOX18        | 0.0001 |
| ANKRD13B     | 0.0001 |
| KIAA1797     | 0.0001 |
| OCR1         | 0.0001 |
| KCNQ1        | 0.0001 |
| LCE1F        | 0.0001 |
| ITPR2        | 0.0001 |
| LOC283788    | 0.0001 |
| ZNF169       | 0.0001 |
| CASC5        | 0.0001 |
| MSL3         | 0.0001 |
| WDPCP        | 0.0001 |
| MAGEB1       | 0.0001 |
| SRPK3        | 0.0001 |
| RNASEH2B     | 0.0001 |
| WFDC10B      | 0.0001 |
| BPNT1        | 0.0001 |
| OR3A3        | 0.0001 |
| AMPH         | 0.0001 |
| C6orf130     | 0.0001 |
| FAM59A       | 0.0001 |
| SAP30        | 0.0001 |
| RHOU         | 0.0001 |
| LOC100126784 | 0.0001 |
| LY86-AS1     | 0.0001 |
| LRRN2        | 0.0001 |
| CXADRP3      | 0.0001 |
| LYG2         | 0.0001 |
| ASNA1        | 0.0001 |
| HCFC2        | 0.0001 |
| NPEPPS       | 0.0001 |
| NOX4         | 0.0001 |
| MGC4294      | 0.0001 |
| FAM198A      | 0.0001 |
| PPY2         | 0.0001 |
| NDUFS4       | 0.0001 |
| FGD1         | 0.0001 |
| RGS6         | 0.0001 |

|              |        |
|--------------|--------|
| ZNF233       | 0.0001 |
| LOC100130357 | 0.0001 |
| TOMM22       | 0.0001 |
| CRCT1        | 0.0001 |
| CFTR         | 0.0001 |
| ZDHHC16      | 0.0001 |
| ENTPD5       | 0.0001 |
| FLJ37798     | 0.0001 |
| FCRLA        | 0.0001 |
| RASGEF1B     | 0.0001 |
| LOC100132167 | 0.0001 |
| FLJ14186     | 0.0001 |
| LOC284561    | 0.0001 |
| ATP13A2      | 0.0001 |
| TNPO1        | 0.0001 |
| APOBEC3F     | 0.0001 |
| ZIC4         | 0.0001 |
| CLPTM1L      | 0.0001 |
| OR52B2       | 0.0001 |
| PLA2G4A      | 0.0001 |
| FADS6        | 0.0001 |
| RBMXL3       | 0.0001 |
| TFPI2        | 0.0001 |
| C5orf39      | 0.0001 |
| KCNV2        | 0.0001 |
| CC2D2A       | 0.0001 |
| LINC00320    | 0.0001 |
| SENP1        | 0.0001 |
| SPPL2B       | 0.0001 |
| COL18A1      | 0.0001 |
| TLR6         | 0.0001 |
| CLCNKA       | 0.0001 |
| KRT6B        | 0.0001 |
| C6orf170     | 0.0001 |
| TRA2B        | 0.0001 |
| PIP4K2C      | 0.0001 |
| LOC100128979 | 0.0001 |
| C15orf32     | 0.0001 |
| ZBTB33       | 0.0001 |
| TAF1C        | 0.0001 |
| LIF          | 0.0001 |
| TMEM196      | 0.0001 |
| CSH1         | 0.0001 |
| SIDT2        | 0.0001 |
| UXS1         | 0.0001 |
| APITD1       | 0.0001 |

|              |        |
|--------------|--------|
| RASL10A      | 0.0001 |
| C10orf47     | 0.0001 |
| EEF2K        | 0.0001 |
| LOC440905    | 0.0001 |
| ATL1         | 0.0001 |
| CST5         | 0.0001 |
| CPLX2        | 0.0001 |
| SCARB1       | 0.0001 |
| SURF2        | 0.0001 |
| PREB         | 0.0001 |
| SLC30A10     | 0.0001 |
| ARMC7        | 0.0001 |
| LOC100506305 | 0.0001 |
| MYADML2      | 0.0001 |
| C11orf41     | 0.0001 |
| GNE          | 0.0001 |
| MARVELD2     | 0.0001 |
| C22orf13     | 0.0001 |
| LIN9         | 0.0001 |
| CD59         | 0.0001 |
| FGB          | 0.0001 |
| WIPF1        | 0.0001 |
| TAS2R14      | 0.0001 |
| ZNF280C      | 0.0001 |
| DGKQ         | 0.0001 |
| RPUSD4       | 0.0001 |
| EFR3A        | 0.0001 |
| TTLL4        | 0.0001 |
| GTF2A2       | 0.0001 |
| ZFR          | 0.0001 |
| ASXL1        | 0.0001 |
| VHL          | 0.0001 |
| FAM154B      | 0.0001 |
| OR13D1       | 0.0001 |
| MFAP5        | 0.0001 |
| SLC2A1       | 0.0001 |
| KPNA6        | 0.0001 |
| CFHR5        | 0.0001 |
| DUS2L        | 0.0001 |
| RASAL1       | 0.0001 |
| ZNF678       | 0.0001 |
| DLG5         | 0.0001 |
| SPDYE1       | 0.0001 |
| FLJ33534     | 0.0001 |
| RPL28        | 0.0001 |
| ASIP         | 0.0001 |

|              |        |
|--------------|--------|
| ND3          | 0.0001 |
| CCT2         | 0.0001 |
| POLR2I       | 0.0001 |
| ATRX         | 0.0001 |
| NBPF11       | 0.0001 |
| CD8B         | 0.0001 |
| GPT          | 0.0001 |
| LOC100653189 | 0.0001 |
| ITGBL1       | 0.0001 |
| LOC646999    | 0.0001 |
| SCGB3A1      | 0.0001 |
| CCL24        | 0.0001 |
| ARHGAP30     | 0.0001 |
| ITPKC        | 0.0001 |
| SLC37A3      | 0.0001 |
| C5orf46      | 0.0001 |
| CAPN2        | 0.0001 |
| SFXN2        | 0.0001 |
| CYP20A1      | 0.0001 |
| TNP2         | 0.0001 |
| HIST1H3I     | 0.0001 |
| CKLF         | 0.0001 |
| IFI30        | 0.0001 |
| FAM27A       | 0.0001 |
| SLC35B1      | 0.0001 |
| BANF1        | 0.0001 |
| ZNF414       | 0.0001 |
| MEGF6        | 0.0001 |
| TOR1B        | 0.0001 |
| SPRYD3       | 0.0001 |
| COQ5         | 0.0001 |
| TLE2         | 0.0001 |
| FAM71E2      | 0.0001 |
| MAT2B        | 0.0001 |
| CD300LB      | 0.0001 |
| LOC221272    | 0.0001 |
| YY1AP1       | 0.0001 |
| MAP3K3       | 0.0001 |
| FMO4         | 0.0001 |
| C7orf54      | 0.0001 |
| HLA-DMB      | 0.0001 |
| C19orf50     | 0.0001 |
| BNIP1        | 0.0001 |
| CPT1B        | 0.0001 |
| LOC399851    | 0.0001 |
| KDM4C        | 0.0001 |

|                 |        |
|-----------------|--------|
| RDH5            | 0.0001 |
| ACTR2           | 0.0001 |
| FAM98B          | 0.0001 |
| C10orf2         | 0.0001 |
| RBMX2           | 0.0001 |
| RGS5            | 0.0001 |
| ANKHD1-EIF4EBP3 | 0.0001 |
| TTC30A          | 0.0001 |
| CNTLN           | 0.0001 |
| MYH11           | 0.0001 |
| PNMA2           | 0.0001 |
| C19orf71        | 0.0001 |
| C22orf24        | 0.0001 |
| CYP17A1         | 0.0001 |
| UBE2NL          | 0.0001 |
| SLC2A12         | 0.0001 |
| ND6             | 0.0001 |
| CD1C            | 0.0001 |
| ELAC2           | 0.0001 |
| MPHOSPH10       | 0.0001 |
| GPC5            | 0.0001 |
| ZDHHC18         | 0.0001 |
| ARL2BP          | 0.0001 |
| CLPX            | 0.0001 |
| DHRS7B          | 0.0001 |
| CLECL1          | 0.0001 |
| ZNF408          | 0.0001 |
| LOC100507568    | 0.0001 |
| LOC285141       | 0.0001 |
| ULK4            | 0.0001 |
| MPI             | 0.0001 |
| ZC3H12A         | 0.0001 |
| ITPRIP          | 0.0001 |
| MAP1LC3B        | 0.0001 |
| SLC19A2         | 0.0001 |
| C1orf192        | 0.0001 |
| VPS4B           | 0.0001 |
| ZNF629          | 0.0001 |
| AKR7L           | 0.0001 |
| GBAP1           | 0.0001 |
| HSP90AB3P       | 0.0001 |
| BNIP3           | 0.0001 |
| PSMF1           | 0.0001 |
| NRCAM           | 0.0001 |
| CXorf51A        | 0.0001 |
| GIF             | 0.0001 |

|           |        |
|-----------|--------|
| LOC645427 | 0.0001 |
| CIRH1A    | 0.0001 |
| MRPL34    | 0.0001 |
| PLVAP     | 0.0001 |
| ITPK1     | 0.0001 |
| LOC400620 | 0.0001 |
| MGC50722  | 0.0001 |
| DCP2      | 0.0001 |
| KITLG     | 0.0001 |
| PCDHGA9   | 0.0001 |
| CHN1      | 0.0001 |
| RASSF1    | 0.0001 |
| TPP2      | 0.0001 |
| RCN1      | 0.0001 |
| FAM20B    | 0.0001 |
| DUSP4     | 0.0001 |
| OGN       | 0.0001 |
| NID2      | 0.0001 |
| GAB1      | 0.0001 |
| BET3L     | 0.0001 |
| INO80D    | 0.0001 |
| NOL9      | 0.0001 |
| RAB3B     | 0.0001 |
| PIK3AP1   | 0.0001 |
| LAT       | 0.0001 |
| WNT8B     | 0.0001 |
| NCAPH2    | 0.0001 |
| COL4A5    | 0.0001 |
| PDLIM3    | 0.0001 |
| TGM2      | 0.0001 |
| FLOT1     | 0.0001 |
| NUDT3     | 0.0001 |
| SLC12A9   | 0.0001 |
| PLEKHG4B  | 0.0001 |
| C21orf88  | 0.0001 |
| RNASE4    | 0.0001 |
| PHF17     | 0.0001 |
| CEP128    | 0.0001 |
| LOC388946 | 0.0001 |
| GUSB      | 0.0001 |
| AHCYL1    | 0.0001 |
| PLEKHG5   | 0.0001 |
| CHRM4     | 0.0001 |
| TCEA3     | 0.0001 |
| COIL      | 0.0001 |
| KIAA1737  | 0.0001 |

|           |        |
|-----------|--------|
| FOXS1     | 0.0001 |
| KRTAP5-8  | 0.0001 |
| SCAND1    | 0.0001 |
| MED12L    | 0.0001 |
| PHF7      | 0.0001 |
| CHEK1     | 0.0001 |
| TUBA8     | 0.0001 |
| PIGG      | 0.0001 |
| SLC13A1   | 0.0001 |
| FAM178A   | 0.0001 |
| C19orf39  | 0.0001 |
| GBF1      | 0.0001 |
| PHYHD1    | 0.0001 |
| GHRH      | 0.0001 |
| HBA1      | 0.0001 |
| NRXN1     | 0.0001 |
| OAF       | 0.0001 |
| TMEM183B  | 0.0001 |
| XRCC5     | 0.0001 |
| ATG12     | 0.0001 |
| ABHD10    | 0.0001 |
| DFNB59    | 0.0001 |
| LMTK3     | 0.0001 |
| PROKR2    | 0.0001 |
| AKD1      | 0.0001 |
| CD3D      | 0.0001 |
| LOC728978 | 0.0001 |
| KRTAP19-1 | 0.0001 |
| FLJ45340  | 0.0001 |
| RPL23AP32 | 0.0001 |
| SLC2A5    | 0.0001 |
| LRRTM1    | 0.0001 |
| RBMS1     | 0.0001 |
| BMP5      | 0.0001 |
| LINC00114 | 0.0001 |
| LOC284344 | 0.0001 |
| AEBP1     | 0.0001 |
| C14orf128 | 0.0001 |
| IRF6      | 0.0001 |
| ZNF785    | 0.0001 |
| SUN2      | 0.0001 |
| TCOF1     | 0.0001 |
| C5orf51   | 0.0001 |
| PNPLA5    | 0.0001 |
| PUF60     | 0.0001 |
| CHRNA10   | 0.0001 |

|              |        |
|--------------|--------|
| PDZD7        | 0.0001 |
| CROCC        | 0.0001 |
| ZKSCAN2      | 0.0001 |
| HSPA12A      | 0.0001 |
| ECHDC3       | 0.0001 |
| FLJ11235     | 0.0001 |
| FAM21A       | 0.0001 |
| P2RX5        | 0.0001 |
| CBLL1        | 0.0001 |
| NUBPL        | 0.0001 |
| KCNIP2       | 0.0001 |
| VOPP1        | 0.0001 |
| PHF10        | 0.0001 |
| HS1BP3       | 0.0001 |
| MAP3K5       | 0.0001 |
| C9orf30      | 0.0001 |
| SPATA18      | 0.0001 |
| RELN         | 0.0001 |
| VCX          | 0.0001 |
| GMEB2        | 0.0001 |
| HMGCR        | 0.0001 |
| MSH2         | 0.0001 |
| FZD3         | 0.0001 |
| EIF2B3       | 0.0001 |
| SYNC         | 0.0001 |
| ZNF512B      | 0.0001 |
| TDH          | 0.0001 |
| SPC24        | 0.0001 |
| MMP3         | 0.0001 |
| ZNF280B      | 0.0001 |
| LOC100130171 | 0.0001 |
| TMPRSS6      | 0.0001 |
| PDK3         | 0.0001 |
| THTPA        | 0.0001 |
| LYPD5        | 0.0001 |
| LTB4R2       | 0.0001 |
| FANCB        | 0.0001 |
| BCL7A        | 0.0001 |
| XG           | 0.0001 |
| ATP8B5P      | 0.0001 |
| FAM179A      | 0.0001 |
| PRSS47       | 0.0001 |
| LOC645591    | 0.0001 |
| AADACL2      | 0.0001 |
| AVPR1B       | 0.0001 |
| PPP1CA       | 0.0001 |



|              |        |
|--------------|--------|
| ZNF501       | 0.0001 |
| C19orf29     | 0.0001 |
| HSP90AB6P    | 0.0001 |
| EIF4E        | 0.0001 |
| DLL1         | 0.0001 |
| TIGD3        | 0.0001 |
| UNKL         | 0.0001 |
| COMT         | 0.0001 |
| DYRK3        | 0.0001 |
| PCGF6        | 0.0001 |
| CLUAP1       | 0.0001 |
| SLC5A7       | 0.0001 |
| ZMYND11      | 0.0001 |
| EGR3         | 0.0001 |
| NEURL        | 0.0001 |
| ORMDL3       | 0.0001 |
| CYP2B6       | 0.0001 |
| GRIP2        | 0.0001 |
| CCNC         | 0.0001 |
| COQ9         | 0.0001 |
| CAMK4        | 0.0001 |
| DIMT1        | 0.0001 |
| COL4A3       | 0.0001 |
| DGKH         | 0.0001 |
| TAAR5        | 0.0001 |
| USO1         | 0.0001 |
| CNTN3        | 0.0001 |
| ABCB10       | 0.0001 |
| ZNF780A      | 0.0001 |
| GDPD2        | 0.0001 |
| RESP18       | 0.0001 |
| PRDM13       | 0.0001 |
| RPS3A        | 0.0001 |
| ISPD         | 0.0001 |
| C1orf31      | 0.0001 |
| SERPINA10    | 0.0001 |
| ESRRB        | 0.0001 |
| LOC100291323 | 0.0001 |
| GGT6         | 0.0001 |
| MUC22        | 0.0001 |
| ARHGAP19     | 0.0001 |
| TSPYL5       | 0.0001 |
| E2F3         | 0.0001 |
| P2RX6P       | 0.0001 |
| UGT1A8       | 0.0001 |
| CHPT1        | 0.0001 |

|              |        |
|--------------|--------|
| MLXIP        | 0.0001 |
| AIM1L        | 0.0001 |
| CCDC58       | 0.0001 |
| DIS3L        | 0.0001 |
| WDR5B        | 0.0001 |
| RING1        | 0.0001 |
| MYO19        | 0.0001 |
| LOC100131232 | 0.0001 |
| MAGEB2       | 0.0001 |
| ATP6V1C2     | 0.0001 |
| USP14        | 0.0001 |
| SLC5A9       | 0.0001 |
| SH2D3A       | 0.0001 |
| LPA          | 0.0001 |
| WDR47        | 0.0001 |
| BRAP         | 0.0001 |
| FCGR2A       | 0.0001 |
| E2F7         | 0.0001 |
| ZNF19        | 0.0001 |
| OR5AK2       | 0.0001 |
| BRIX1        | 0.0001 |
| CDKN1C       | 0.0001 |
| JMY          | 0.0001 |
| SYNE2        | 0.0001 |
| LOC100129775 | 0.0001 |
| RAD54B       | 0.0001 |
| LEPROTL1     | 0.0001 |
| C9orf16      | 0.0001 |
| DGAT1        | 0.0001 |
| ETFB         | 0.0001 |
| LOC100130815 | 0.0001 |
| THRB         | 0.0001 |
| SERTAD2      | 0.0001 |
| SGK223       | 0.0001 |
| SNTN         | 0.0001 |
| TAF1D        | 0.0001 |
| BRWD3        | 0.0001 |
| MS4A5        | 0.0001 |
| TRIM2        | 0.0001 |
| CSTA         | 0.0001 |
| BRD8         | 0.0001 |
| ZFYVE28      | 0.0001 |
| ROPN1L       | 0.0001 |
| ANKRD34A     | 0.0001 |
| FUNDC2P2     | 0.0001 |
| ISG20L2      | 0.0001 |

|          |        |
|----------|--------|
| COL5A1   | 0.0001 |
| CAND2    | 0.0001 |
| ACTR1A   | 0.0001 |
| ERAS     | 0.0001 |
| CPNE9    | 0.0001 |
| C11orf82 | 0.0001 |
| MAP6D1   | 0.0001 |
| FOXO4    | 0.0001 |
| MPP2     | 0.0001 |
| F3       | 0.0001 |
| DNAH1    | 0.0001 |
| HDAC3    | 0.0001 |
| MRPS2    | 0.0001 |
| LRRC8E   | 0.0001 |
| AFF1     | 0.0001 |
| ABHD15   | 0.0001 |
| PECAM1   | 0.0001 |
| USE1     | 0.0001 |
| GPR1     | 0.0001 |
| ARPC1A   | 0.0001 |
| THOP1    | 0.0001 |
| GOLGA8A  | 0.0001 |
| RB1CC1   | 0.0001 |
| CR1      | 0.0001 |
| UNC5CL   | 0.0001 |
| GNB4     | 0.0001 |
| VPS25    | 0.0001 |
| MGAT3    | 0.0001 |
| PVALB    | 0.0001 |
| VANGL1   | 0.0001 |
| C1orf226 | 0.0001 |
| DISP1    | 0.0001 |
| DYSF     | 0.0001 |
| CIDEC    | 0.0001 |
| HEATR7A  | 0.0001 |
| MED1     | 0.0001 |
| RIN1     | 0.0001 |
| RPS3     | 0.0001 |
| PLAUR    | 0.0001 |
| C16orf71 | 0.0001 |
| YWHAQ    | 0.0001 |
| CCT8     | 0.0001 |
| DAGLB    | 0.0001 |
| LIMD1    | 0.0001 |
| PRSS36   | 0.0001 |
| PGRMC2   | 0.0001 |

|              |        |
|--------------|--------|
| RNASEH1      | 0.0001 |
| PCDH8        | 0.0001 |
| PHLDB1       | 0.0001 |
| SLC9B2       | 0.0001 |
| TBRG4        | 0.0001 |
| ADCK5        | 0.0001 |
| EIF2D        | 0.0001 |
| RPL7A        | 0.0001 |
| FAM92A1      | 0.0001 |
| DKFZP434K028 | 0.0001 |
| PLEKHM2      | 0.0001 |
| CAP1         | 0.0001 |
| ANXA1        | 0.0001 |
| CXCL3        | 0.0001 |
| ROBO2        | 0.0001 |
| TTF2         | 0.0001 |
| ANAPC7       | 0.0001 |
| CRB1         | 0.0001 |
| SSTR5        | 0.0001 |
| ARL8A        | 0.0001 |
| RFFL         | 0.0001 |
| FAM173A      | 0.0001 |
| DDB2         | 0.0001 |
| MPP1         | 0.0001 |
| PEAK1        | 0.0001 |
| ZFP37        | 0.0001 |
| MAPK9        | 0.0001 |
| UBE2O        | 0.0001 |
| EXOSC4       | 0.0001 |
| C9orf96      | 0.0001 |
| LILRB5       | 0.0001 |
| ERV9-1       | 0.0001 |
| MAP2K3       | 0.0001 |
| FPGT         | 0.0001 |
| FEZ2         | 0.0001 |
| C4orf45      | 0.0001 |
| ATP6V1E1     | 0.0001 |
| PPIL4        | 0.0001 |
| IRX1         | 0.0001 |
| ZNF600       | 0.0001 |
| NFKBIE       | 0.0001 |
| HOTAIR       | 0.0001 |
| LOC100507487 | 0.0001 |
| EIF2S2       | 0.0001 |
| LASP1        | 0.0001 |
| NAP1L4       | 0.0001 |

|              |        |
|--------------|--------|
| CHD3         | 0.0001 |
| ITIH3        | 0.0001 |
| LEPREL1      | 0.0001 |
| TMEM220      | 0.0001 |
| CLEC16A      | 0.0001 |
| C12orf34     | 0.0001 |
| TAS2R42      | 0.0001 |
| CSHL1        | 0.0001 |
| ADAM5P       | 0.0001 |
| SV2C         | 0.0001 |
| LOC100134663 | 0.0001 |
| ACTG1        | 0.0001 |
| C18orf8      | 0.0001 |
| OXR1         | 0.0001 |
| CHD2         | 0.0001 |
| MAOB         | 0.0001 |
| MIS12        | 0.0001 |
| HSPB7        | 0.0001 |
| AGFG2        | 0.0001 |
| PLD4         | 0.0001 |
| SERPINB10    | 0.0001 |
| LPXN         | 0.0001 |
| LOC100505930 | 0.0001 |
| TIMP1        | 0.0001 |
| KCNF1        | 0.0001 |
| SLFNL1       | 0.0001 |
| AAMP         | 0.0001 |
| TNFAIP8L2    | 0.0001 |
| KIAA1652     | 0.0001 |
| PSAT1        | 0.0001 |
| C1orf95      | 0.0001 |
| GSPT2        | 0.0001 |
| CD300LD      | 0.0001 |
| ENDOV        | 0.0001 |
| ZFP14        | 0.0001 |
| SLC17A5      | 0.0001 |
| NCOA4        | 0.0001 |
| CATSPERB     | 0.0001 |
| SLC17A6      | 0.0001 |
| UCMA         | 0.0001 |
| OPN4         | 0.0001 |
| GTF2H4       | 0.0001 |
| SLC24A1      | 0.0001 |
| GOLPH3       | 0.0001 |
| LOC100129960 | 0.0001 |
| ITPR3        | 0.0001 |

|              |        |
|--------------|--------|
| C1QTNF3      | 0.0001 |
| SIGLEC6      | 0.0001 |
| AKR1B1       | 0.0001 |
| LINC00226    | 0.0001 |
| SLC32A1      | 0.0001 |
| LIPT1        | 0.0001 |
| DNASE1L2     | 0.0001 |
| CXADRP2      | 0.0001 |
| RER1         | 0.0001 |
| LRTOMT       | 0.0001 |
| NHLRC4       | 0.0001 |
| PCDHGC4      | 0.0001 |
| AGSK1        | 0.0001 |
| ESCO2        | 0.0001 |
| LOC100288846 | 0.0001 |
| PANX2        | 0.0001 |
| RNF130       | 0.0001 |
| LOC729678    | 0.0001 |
| FHL5         | 0.0001 |
| IGDCC4       | 0.0001 |
| PLEKHH1      | 0.0001 |
| SOCS5        | 0.0001 |
| GOSR1        | 0.0001 |
| GPR135       | 0.0001 |
| RPL10L       | 0.0001 |
| CCM2         | 0.0001 |
| TMEM134      | 0.0001 |
| TMEM127      | 0.0001 |
| NXPH2        | 0.0001 |
| DNAJB14      | 0.0001 |
| GPIHBP1      | 0.0001 |
| USH1C        | 0.0001 |
| FAM113B      | 0.0001 |
| PDE4D        | 0.0001 |
| ID3          | 0.0001 |
| FAM103A1     | 0.0001 |
| RAB6C        | 0.0001 |
| SLC35A4      | 0.0001 |
| DLL4         | 0.0001 |
| HDGFL1       | 0.0001 |
| FARSA        | 0.0001 |
| GPKOW        | 0.0001 |
| PRO1768      | 0.0001 |
| RYR2         | 0.0001 |
| PSMB6        | 0.0001 |
| GAP43        | 0.0001 |

|              |        |
|--------------|--------|
| PIIP5K2      | 0.0001 |
| OLFML2A      | 0.0001 |
| MMAB         | 0.0001 |
| CEP290       | 0.0001 |
| SEMA5A       | 0.0001 |
| TSPAN13      | 0.0001 |
| LMBR1L       | 0.0001 |
| SIRPG        | 0.0001 |
| LOC100131564 | 0.0001 |
| AP2S1        | 0.0001 |
| OSGEPL1      | 0.0001 |
| ITGAV        | 0.0001 |
| ZNF425       | 0.0001 |
| HSPB11       | 0.0001 |
| FLJ20021     | 0.0001 |
| TCERG1L      | 0.0001 |
| RAET1E       | 0.0001 |
| BPI          | 0.0001 |
| KIAA1654     | 0.0001 |
| ESCO1        | 0.0001 |
| KRTAP17-1    | 0.0001 |
| SYCE2        | 0.0001 |
| NR1H2        | 0.0001 |
| TCTN2        | 0.0001 |
| LIN7A        | 0.0001 |
| C11orf67     | 0.0001 |
| NOL7         | 0.0001 |
| FAM54B       | 0.0001 |
| PCDHB2       | 0.0001 |
| ARAF         | 0.0001 |
| CBY3         | 0.0001 |
| KDM5B        | 0.0001 |
| TSGA10IP     | 0.0001 |
| PIN1P1       | 0.0001 |
| GADD45A      | 0.0001 |
| SLPI         | 0.0001 |
| DIO2         | 0.0001 |
| RHOBTB3      | 0.0001 |
| SPECC1       | 0.0001 |
| GZMB         | 0.0001 |
| ASB5         | 0.0001 |
| DDX4         | 0.0001 |
| ECT2         | 0.0001 |
| TMCO6        | 0.0001 |
| FNDC8        | 0.0001 |
| ICK          | 0.0001 |

|              |        |
|--------------|--------|
| GUSBP11      | 0.0001 |
| IGF2BP2      | 0.0001 |
| LRRIQ1       | 0.0001 |
| MCFD2        | 0.0001 |
| SLC39A14     | 0.0001 |
| INTS5        | 0.0001 |
| QSOX1        | 0.0001 |
| JPH3         | 0.0001 |
| LYRM4        | 0.0001 |
| FAM194A      | 0.0001 |
| SEC11C       | 0.0001 |
| USP8         | 0.0001 |
| LOC100129935 | 0.0001 |
| RETSAT       | 0.0001 |
| GP2          | 0.0001 |
| GNL3         | 0.0001 |
| SHF          | 0.0001 |
| LOC100506470 | 0.0001 |
| PCP4         | 0.0001 |
| ANKRD11      | 0.0001 |
| RNASEH2C     | 0.0001 |
| LOC400657    | 0.0001 |
| TYMS         | 0.0001 |
| RAB13        | 0.0001 |
| C1orf210     | 0.0001 |
| CSNK1A1L     | 0.0001 |
| FGF18        | 0.0001 |
| ACTR1B       | 0.0001 |
| DOT1L        | 0.0001 |
| PLIN4        | 0.0001 |
| CCDC117      | 0.0001 |
| ZNF445       | 0.0001 |
| BTK          | 0.0001 |
| TRIM24       | 0.0001 |
| FH           | 0.0001 |
| TLR10        | 0.0001 |
| ICT1         | 0.0001 |
| CHAMP1       | 0.0001 |
| BBC3         | 0.0001 |
| C6orf99      | 0.0001 |
| MRGPRX3      | 0.0001 |
| FAM134A      | 0.0001 |
| LOC100286922 | 0.0001 |
| WEE1         | 0.0001 |
| B3GALNT2     | 0.0001 |
| COPS6        | 0.0001 |



|              |        |
|--------------|--------|
| NGF          | 0.0001 |
| CEP170       | 0.0001 |
| ADAMTS20     | 0.0001 |
| WDR70        | 0.0001 |
| LBX2         | 0.0001 |
| ATP12A       | 0.0001 |
| AKR1A1       | 0.0001 |
| LCN15        | 0.0001 |
| CP           | 0.0001 |
| MXD4         | 0.0001 |
| FAM180A      | 0.0001 |
| ZNF7         | 0.0001 |
| PITPNM3      | 0.0001 |
| CTNNA2       | 0.0001 |
| WDR38        | 0.0001 |
| TMEM121      | 0.0001 |
| PAF1         | 0.0001 |
| SLC35A5      | 0.0001 |
| CXorf40B     | 0.0001 |
| FAM162B      | 0.0001 |
| TCF7         | 0.0001 |
| DPH3P1       | 0.0001 |
| SLC8A1       | 0.0001 |
| TMEM100      | 0.0001 |
| DCPS         | 0.0001 |
| LOC401022    | 0.0001 |
| CD96         | 0.0001 |
| METTTL2B     | 0.0001 |
| PM20D2       | 0.0001 |
| KIAA1586     | 0.0001 |
| LOC100144602 | 0.0001 |
| LACTB2       | 0.0001 |
| MED28        | 0.0001 |
| SPATS2L      | 0.0001 |
| SPARC        | 0.0001 |
| DICER1-AS    | 0.0001 |
| TRNT1        | 0.0001 |
| KLHL5        | 0.0001 |
| CMTM2        | 0.0001 |
| ZNF804B      | 0.0001 |
| MED21        | 0.0001 |
| MYOT         | 0.0001 |
| LOC100506844 | 0.0001 |
| TMEM178      | 0.0001 |
| TBC1D15      | 0.0001 |
| CNN3         | 0.0001 |

|              |        |
|--------------|--------|
| MICA         | 0.0001 |
| PACSIN1      | 0.0001 |
| PRO2949      | 0.0001 |
| HAO1         | 0.0001 |
| PRND         | 0.0001 |
| COPS5        | 0.0001 |
| CASP8AP2     | 0.0001 |
| C17orf78     | 0.0001 |
| LIMS1        | 0.0001 |
| ARMC5        | 0.0001 |
| MANBAL       | 0.0001 |
| SLC39A4      | 0.0001 |
| BST1         | 0.0001 |
| INS          | 0.0001 |
| GOLGA6C      | 0.0001 |
| LOC100130705 | 0.0001 |
| CREBBP       | 0.0001 |
| SGCE         | 0.0001 |
| POLR3GL      | 0.0001 |
| COPS7A       | 0.0001 |
| ZCCHC10      | 0.0001 |
| BZRAP1       | 0.0001 |
| TSSC4        | 0.0001 |
| ING3         | 0.0001 |
| SIM1         | 0.0001 |
| ATG9B        | 0.0001 |
| CHST9        | 0.0001 |
| UBA7         | 0.0001 |
| SPRY4        | 0.0001 |
| CLYBL        | 0.0001 |
| S100A8       | 0.0001 |
| HIST1H2BO    | 0.0001 |
| C11orf9      | 0.0001 |
| DNM1         | 0.0001 |
| C11orf16     | 0.0001 |
| PAFAH1B2     | 0.0001 |
| E2F8         | 0.0001 |
| SUCNR1       | 0.0001 |
| ZNF721       | 0.0001 |
| ERBB2IP      | 0.0001 |
| HMGA2        | 0.0001 |
| TEKT3        | 0.0001 |
| MAP3K8       | 0.0001 |
| PXDN         | 0.0001 |
| LRP8         | 0.0001 |
| SYT14        | 0.0001 |

|              |        |
|--------------|--------|
| WFDC8        | 0.0001 |
| MT3          | 0.0001 |
| BRD9         | 0.0001 |
| IGSF23       | 0.0001 |
| GPR183       | 0.0001 |
| KLHL13       | 0.0001 |
| GAS8         | 0.0001 |
| FBXO11       | 0.0001 |
| RPL13AP17    | 0.0001 |
| EP400        | 0.0001 |
| CCDC105      | 0.0001 |
| NGLY1        | 0.0001 |
| APOC4        | 0.0001 |
| PDX1         | 0.0001 |
| UBTF         | 0.0001 |
| UTP20        | 0.0001 |
| THYN1        | 0.0001 |
| NCL          | 0.0001 |
| ATP6V0E2     | 0.0001 |
| NINJ2        | 0.0001 |
| ACBD3        | 0.0001 |
| HSPC072      | 0.0001 |
| OGFOD1       | 0.0001 |
| WDR48        | 0.0001 |
| PTPN18       | 0.0001 |
| VPREB1       | 0.0001 |
| ZMYM1        | 0.0001 |
| ARL6IP4      | 0.0001 |
| ZFYVE21      | 0.0001 |
| ABCC1        | 0.0001 |
| FAM129A      | 0.0001 |
| CLEC4D       | 0.0001 |
| COPG         | 0.0001 |
| MTNR1B       | 0.0001 |
| DYNC1LI2     | 0.0001 |
| NUBP1        | 0.0001 |
| HVCN1        | 0.0001 |
| SLC34A3      | 0.0001 |
| LOC100131860 | 0.0001 |
| RFX6         | 0.0001 |
| CTNNAL1      | 0.0001 |
| QARS         | 0.0001 |
| PIGX         | 0.0001 |
| TMED3        | 0.0001 |
| KCNK18       | 0.0001 |
| L1TD1        | 0.0001 |

|              |        |
|--------------|--------|
| PPM1G        | 0.0001 |
| BACH2        | 0.0001 |
| HAL          | 0.0001 |
| BTBD11       | 0.0001 |
| ZNF205       | 0.0001 |
| OR10T2       | 0.0001 |
| MTOR         | 0.0001 |
| TTC15        | 0.0001 |
| CLRN3        | 0.0001 |
| CYTH4        | 0.0001 |
| C14orf102    | 0.0001 |
| MSH6         | 0.0001 |
| NHEJ1        | 0.0001 |
| TOMM40L      | 0.0001 |
| TFE3         | 0.0001 |
| MPPED1       | 0.0001 |
| RGAG1        | 0.0001 |
| AP3M2        | 0.0001 |
| LINC00174    | 0.0001 |
| LINC00085    | 0.0001 |
| MED22        | 0.0001 |
| MRPL19       | 0.0001 |
| AGBL2        | 0.0001 |
| NEK1         | 0.0001 |
| SMTN         | 0.0001 |
| PNMA1        | 0.0001 |
| LOC100506649 | 0.0001 |
| CNOT1        | 0.0001 |
| XKR5         | 0.0001 |
| CAMK2A       | 0.0001 |
| E4F1         | 0.0001 |
| SLK          | 0.0001 |
| ANKLE2       | 0.0001 |
| SREK1IP1     | 0.0001 |
| DTX4         | 0.0001 |
| LOC100509861 | 0.0001 |
| GPR137B      | 0.0001 |
| RNASEH2A     | 0.0001 |
| C6orf228     | 0.0001 |
| LOC51145     | 0.0001 |
| RWDD4        | 0.0001 |
| NAP1L2       | 0.0001 |
| GALP         | 0.0001 |
| CATX-1       | 0.0001 |
| PROK1        | 0.0001 |
| SLC16A6      | 0.0001 |

|              |        |
|--------------|--------|
| TBC1D26      | 0.0001 |
| LOC100506428 | 0.0001 |
| STEAP4       | 0.0001 |
| TSSK3        | 0.0001 |
| PRDX1        | 0.0001 |
| SREK1        | 0.0001 |
| ZNF296       | 0.0001 |
| COMMD7       | 0.0001 |
| ZNF426       | 0.0001 |
| C1orf54      | 0.0001 |
| ZCCHC4       | 0.0001 |
| PTBP1        | 0.0001 |
| DPY19L1      | 0.0001 |
| MYBBP1A      | 0.0001 |
| ZNF317       | 0.0001 |
| KLHDC2       | 0.0001 |
| ADH4         | 0.0001 |
| ZNF462       | 0.0001 |
| COMMD10      | 0.0001 |
| FAM208A      | 0.0001 |
| EML1         | 0.0001 |
| CINP         | 0.0001 |
| TMEM163      | 0.0001 |
| IFNGR2       | 0.0001 |
| GHITM        | 0.0001 |
| LOC100507206 | 0.0001 |
| MAML1        | 0.0001 |
| MRPL51       | 0.0001 |
| PI4K2A       | 0.0001 |
| RNF139       | 0.0001 |
| ZNF280D      | 0.0001 |
| SELE         | 0.0001 |
| AMIGO2       | 0.0001 |
| LYPD2        | 0.0001 |
| TMEM87B      | 0.0001 |
| FGF2         | 0.0001 |
| CLP1         | 0.0001 |
| GABBR2       | 0.0001 |
| SLC24A2      | 0.0001 |
| ARID4B       | 0.0001 |
| PAEP         | 0.0001 |
| HEXA         | 0.0001 |
| VIT          | 0.0001 |
| LOC100130071 | 0.0001 |
| IGFBPL1      | 0.0001 |
| CCDC30       | 0.0001 |

|           |        |
|-----------|--------|
| FABP7     | 0.0001 |
| LEUTX     | 0.0001 |
| PTX3      | 0.0001 |
| ZNF14     | 0.0001 |
| TNFRSF12A | 0.0001 |
| CUBN      | 0.0001 |
| CGB       | 0.0001 |
| SST       | 0.0001 |
| C1orf50   | 0.0001 |
| HCG23     | 0.0001 |
| CARD11    | 0.0001 |
| PABPC4L   | 0.0001 |
| ENPP4     | 0.0001 |
| CLN5      | 0.0001 |
| CMBL      | 0.0001 |
| LOC388242 | 0.0001 |
| KRT1      | 0.0001 |
| DOPEY2    | 0.0001 |
| NOP56     | 0.0001 |
| LPAR2     | 0.0001 |
| GALNS     | 0.0001 |
| TMEM72    | 0.0001 |
| TMEM14E   | 0.0001 |
| CER1      | 0.0001 |
| ANKFN1    | 0.0001 |
| TYRP1     | 0.0001 |
| UBA3      | 0.0001 |
| SLC25A42  | 0.0001 |
| DARS      | 0.0001 |
| OSBPL3    | 0.0001 |
| NEDD9     | 0.0001 |
| ZNF354C   | 0.0001 |
| LINC00260 | 0.0001 |
| YDJC      | 0.0001 |
| VAMP2     | 0.0001 |
| MGC27382  | 0.0001 |
| TRAIP     | 0.0001 |
| CPN2      | 0.0001 |
| SLC27A1   | 0.0001 |
| CMAHP     | 0.0001 |
| DCAKD     | 0.0001 |
| ERCC3     | 0.0001 |
| SEC14L5   | 0.0001 |
| PINX1     | 0.0001 |
| NIPAL3    | 0.0001 |
| STRA6     | 0.0001 |

|              |        |
|--------------|--------|
| OPN1LW       | 0.0001 |
| OLIG2        | 0.0001 |
| GPR75        | 0.0001 |
| HLA-G        | 0.0001 |
| LOC145837    | 0.0001 |
| POGLUT1      | 0.0001 |
| PILRA        | 0.0001 |
| PRKCQ        | 0.0001 |
| RETNLB       | 0.0001 |
| LOC100652733 | 0.0001 |
| LYPD3        | 0.0001 |
| SPSB3        | 0.0001 |
| MICAL1       | 0.0001 |
| MED20        | 0.0001 |
| HEPH         | 0.0001 |
| C9orf91      | 0.0001 |
| BCCIP        | 0.0001 |
| PRAF2        | 0.0001 |
| GALE         | 0.0001 |
| NACAD        | 0.0001 |
| SYTL3        | 0.0001 |
| LOC100507205 | 0.0001 |
| VAMP4        | 0.0001 |
| LOC100128893 | 0.0001 |
| CBS          | 0.0001 |
| CCNT1        | 0.0001 |
| CD28         | 0.0001 |
| B4GALT4      | 0.0001 |
| DKKL1        | 0.0001 |
| TMEM225      | 0.0001 |
| SLC31A1      | 0.0001 |
| KLF15        | 0.0001 |
| LLPH         | 0.0001 |
| EBLN2        | 0.0001 |
| CHRNA4       | 0.0001 |
| RDH8         | 0.0001 |
| C4orf47      | 0.0001 |
| RCC2         | 0.0001 |
| HIST1H2AM    | 0.0001 |
| NDST2        | 0.0001 |
| DEPDC1       | 0.0001 |
| SMCHD1       | 0.0001 |
| NPL          | 0.0001 |
| PDCD7        | 0.0001 |
| LRRC39       | 0.0001 |
| TMEM51       | 0.0001 |

|           |        |
|-----------|--------|
| EMG1      | 0.0001 |
| PARN      | 0.0001 |
| RLN3      | 0.0001 |
| NLRP5     | 0.0001 |
| COPA      | 0.0001 |
| SUV39H2   | 0.0001 |
| KIAA0355  | 0.0001 |
| ATAD2B    | 0.0001 |
| HCN3      | 0.0001 |
| ZFP36L1   | 0.0001 |
| SHH       | 0.0001 |
| NEUROD4   | 0.0001 |
| PCM1      | 0.0001 |
| NACA      | 0.0001 |
| FAM65C    | 0.0001 |
| CD44      | 0.0001 |
| MRPS30    | 0.0001 |
| C1orf212  | 0.0001 |
| KLHL14    | 0.0001 |
| C12orf52  | 0.0001 |
| CDH9      | 0.0001 |
| GJD4      | 0.0001 |
| PCIF1     | 0.0001 |
| YOD1      | 0.0001 |
| MAG       | 0.0001 |
| UEVLD     | 0.0001 |
| CHD7      | 0.0001 |
| UNC13D    | 0.0001 |
| ZNF761    | 0.0001 |
| PIH2      | 0.0001 |
| SLC30A1   | 0.0001 |
| FAS       | 0.0001 |
| VN1R3     | 0.0001 |
| BTBD1     | 0.0001 |
| OR2H2     | 0.0001 |
| SRP72     | 0.0001 |
| C7orf49   | 0.0001 |
| RNF8      | 0.0001 |
| PRIM2     | 0.0001 |
| APC       | 0.0001 |
| DYM       | 0.0001 |
| FSTL3     | 0.0001 |
| LOC338799 | 0.0001 |
| VSNL1     | 0.0001 |
| SYT1      | 0.0001 |
| POLR2L    | 0.0001 |



|              |        |
|--------------|--------|
| CAPN11       | 0.0001 |
| C1GALT1      | 0.0001 |
| KNDC1        | 0.0001 |
| RDH11        | 0.0001 |
| HYAL2        | 0.0001 |
| ERBB4        | 0.0001 |
| SYT17        | 0.0001 |
| ARPC5L       | 0.0001 |
| CDC14C       | 0.0001 |
| SEC16A       | 0.0001 |
| LOC90499     | 0.0001 |
| SALL2        | 0.0001 |
| ACTR3        | 0.0001 |
| TPTE         | 0.0001 |
| C7orf53      | 0.0001 |
| MEP1B        | 0.0001 |
| LBR          | 0.0001 |
| FAM43A       | 0.0001 |
| GPD1         | 0.0001 |
| DNAJC3-AS1   | 0.0001 |
| HIST1H3G     | 0.0001 |
| PITPNA       | 0.0001 |
| ZNF398       | 0.0001 |
| PAFAH2       | 0.0001 |
| B9D1         | 0.0001 |
| GABRP        | 0.0001 |
| SUGP1        | 0.0001 |
| LOC100133091 | 0.0001 |
| WNK2         | 0.0001 |
| NPHS2        | 0.0001 |
| MYO1A        | 0.0001 |
| C19orf23     | 0.0001 |
| CAPN10       | 0.0001 |
| LOC100133299 | 0.0001 |
| RBPJ         | 0.0001 |
| PLCH2        | 0.0001 |
| TCTE3        | 0.0001 |
| DHRS7        | 0.0001 |
| ZNF696       | 0.0001 |
| LOC100505978 | 0.0001 |
| HTRA1        | 0.0001 |
| GNA15        | 0.0001 |
| ZNF324       | 0.0001 |
| PGCP         | 0.0001 |
| ASPHD2       | 0.0001 |
| KIFAP3       | 0.0001 |

|           |        |
|-----------|--------|
| DNAJC15   | 0.0001 |
| ACADL     | 0.0001 |
| BEX4      | 0.0001 |
| RCN2      | 0.0001 |
| SPACA1    | 0.0001 |
| ATAT1     | 0.0001 |
| USP40     | 0.0001 |
| PIR       | 0.0001 |
| WNT7A     | 0.0001 |
| MBTPS2    | 0.0001 |
| PLAG1     | 0.0001 |
| PTPN12    | 0.0001 |
| MED9      | 0.0001 |
| COX7C     | 0.0001 |
| TRIM26    | 0.0001 |
| ZNF222    | 0.0001 |
| HNRNPA1   | 0.0001 |
| DCHS2     | 0.0001 |
| AQP3      | 0.0001 |
| SEMA7A    | 0.0001 |
| KRT3      | 0.0001 |
| DHX38     | 0.0001 |
| FLJ41350  | 0.0001 |
| TET1      | 0.0001 |
| CD9       | 0.0001 |
| SETDB1    | 0.0001 |
| ZDHHC24   | 0.0001 |
| SCD       | 0.0001 |
| PPWD1     | 0.0001 |
| AMACR     | 0.0001 |
| MS4A14    | 0.0001 |
| NR3C2     | 0.0001 |
| GABRA1    | 0.0001 |
| BICD1     | 0.0001 |
| LOC645206 | 0.0001 |
| NOX3      | 0.0001 |
| ACBD7     | 0.0001 |
| ELFN1     | 0.0001 |
| TPSD1     | 0.0001 |
| THEM4     | 0.0001 |
| TMEM170B  | 0.0001 |
| FLJ42627  | 0.0001 |
| ARHGAP18  | 0.0001 |
| SMARCA2   | 0.0001 |
| SLC2A3    | 0.0001 |
| CRLF1     | 0.0001 |

|           |        |
|-----------|--------|
| C11orf24  | 0.0001 |
| CD300A    | 0.0001 |
| NDRG2     | 0.0001 |
| SLC6A15   | 0.0001 |
| CCDC18    | 0.0001 |
| ATF5      | 0.0001 |
| TRAPPC8   | 0.0001 |
| ZNF839    | 0.0001 |
| PDE1C     | 0.0001 |
| CTBP1     | 0.0001 |
| MUC3A     | 0.0001 |
| PKP4      | 0.0001 |
| KLHL22    | 0.0001 |
| IAH1      | 0.0001 |
| MRPS15    | 0.0001 |
| TLR3      | 0.0001 |
| KLK3      | 0.0001 |
| SLC44A2   | 0.0001 |
| FAM158A   | 0.0001 |
| ACVR1     | 0.0001 |
| PRMT10    | 0.0001 |
| KLHL17    | 0.0001 |
| C4orf7    | 0.0001 |
| TAS1R2    | 0.0001 |
| TP63      | 0.0001 |
| ZNF211    | 0.0001 |
| SYT12     | 0.0001 |
| DGKA      | 0.0001 |
| HLA-DRB6  | 0.0001 |
| MOSPD1    | 0.0001 |
| WWC1      | 0.0001 |
| RPRML     | 0.0001 |
| ZYG11B    | 0.0001 |
| SDPR      | 0.0001 |
| NINJ1     | 0.0001 |
| ALDH5A1   | 0.0001 |
| ZNF341    | 0.0001 |
| DLAT      | 0.0001 |
| BPY2B     | 0.0001 |
| F8        | 0.0001 |
| ZNF17     | 0.0001 |
| LOC643387 | 0.0001 |
| PPP1CC    | 0.0001 |
| C12orf44  | 0.0001 |
| VEGFB     | 0.0001 |
| HNRNPUL2  | 0.0001 |

|            |        |
|------------|--------|
| GOLGB1     | 0.0001 |
| MFS4       | 0.0001 |
| C19orf52   | 0.0001 |
| GPA33      | 0.0001 |
| ACAD11     | 0.0001 |
| RALGPS2    | 0.0001 |
| ACOT2      | 0.0001 |
| NXT2       | 0.0001 |
| IFNA2      | 0.0001 |
| OSTM1      | 0.0001 |
| GGPS1      | 0.0001 |
| CIB1       | 0.0001 |
| ACTRT2     | 0.0001 |
| GADD45GIP1 | 0.0001 |
| GFPT1      | 0.0001 |
| ALAD       | 0.0001 |
| CYP26A1    | 0.0001 |
| POPDC2     | 0.0001 |
| CEP41      | 0.0001 |
| C3orf35    | 0.0001 |
| COX7A1     | 0.0001 |
| GLRA1      | 0.0001 |
| SPRY1      | 0.0001 |
| PRR22      | 0.0001 |
| SNRNP200   | 0.0001 |
| BRCA1      | 0.0001 |
| TEAD4      | 0.0001 |
| DDX1       | 0.0001 |
| SFSWAP     | 0.0001 |
| SMYD3      | 0.0001 |
| USP4       | 0.0001 |
| CACNA1D    | 0.0001 |
| ZNF383     | 0.0001 |
| SLC10A3    | 0.0001 |
| FAM186B    | 0.0001 |
| ZNF436     | 0.0001 |
| ADAM30     | 0.0001 |
| MGC2752    | 0.0001 |
| PCDHA8     | 0.0001 |
| ALDH3A2    | 0.0001 |
| KPNB1      | 0.0001 |
| NR0B1      | 0.0001 |
| FAM59B     | 0.0001 |
| FUNDC2     | 0.0001 |
| YARS       | 0.0001 |
| GABRA4     | 0.0001 |

|              |        |
|--------------|--------|
| LINC00303    | 0.0001 |
| EIF2A        | 0.0001 |
| SH2D2A       | 0.0001 |
| BTBD9        | 0.0001 |
| NDUFS8       | 0.0001 |
| MCM7         | 0.0001 |
| SUMO3        | 0.0001 |
| ANKRD60      | 0.0001 |
| MYO5B        | 0.0001 |
| LOC100506837 | 0.0001 |
| VEPH1        | 0.0001 |
| ZNF285       | 0.0001 |
| PTPRO        | 0.0001 |
| CHST11       | 0.0001 |
| PUS10        | 0.0001 |
| MAP2K4       | 0.0001 |
| ITPRIPL1     | 0.0001 |
| ECI2         | 0.0001 |
| COL23A1      | 0.0001 |
| PTPRE        | 0.0001 |
| C5orf56      | 0.0001 |
| CRYL1        | 0.0001 |
| MRPS6        | 0.0001 |
| VSTM4        | 0.0001 |
| GCSH         | 0.0001 |
| DPP7         | 0.0001 |
| SDCBP        | 0.0001 |
| F13B         | 0.0001 |
| NPSR1        | 0.0001 |
| PNKP         | 0.0001 |
| LOC100329109 | 0.0001 |
| NTSR2        | 0.0001 |
| LOC339290    | 0.0001 |
| C12orf36     | 0.0001 |
| CEP57        | 0.0001 |
| TP53INP2     | 0.0001 |
| CDH16        | 0.0001 |
| ADAMTSL1     | 0.0001 |
| CNPY3        | 0.0001 |
| SLC47A1      | 0.0001 |
| ZUFSP        | 0.0001 |
| LOC100505944 | 0.0001 |
| CD180        | 0.0001 |
| C9orf86      | 0.0001 |
| KERA         | 0.0001 |
| INPP5A       | 0.0001 |

|              |        |
|--------------|--------|
| PEX5L        | 0.0001 |
| MYO16        | 0.0001 |
| TSPAN12      | 0.0001 |
| RBM41        | 0.0001 |
| CYP11A1      | 0.0001 |
| RIBC1        | 0.0001 |
| CREB5        | 0.0001 |
| PRL          | 0.0001 |
| FAM156A      | 0.0001 |
| STAB1        | 0.0001 |
| SLC38A2      | 0.0001 |
| GPR17        | 0.0001 |
| SPTBN1       | 0.0001 |
| TMEM151B     | 0.0001 |
| VSIG2        | 0.0001 |
| ZNF493       | 0.0001 |
| FAM107B      | 0.0001 |
| DUSP7        | 0.0001 |
| C16orf5      | 0.0001 |
| DNM2         | 0.0001 |
| LOC729911    | 0.0001 |
| GIN52        | 0.0001 |
| TAS2R31      | 0.0001 |
| METTL18      | 0.0001 |
| LOC100506334 | 0.0001 |
| RGL3         | 0.0001 |
| LYSMD3       | 0.0001 |
| SPTAN1       | 0.0001 |
| FAM102A      | 0.0001 |
| IK           | 0.0001 |
| ZNF592       | 0.0001 |
| FGF6         | 0.0001 |
| FAM132A      | 0.0001 |
| DDHD1        | 0.0001 |
| KRT10        | 0.0001 |
| ANKS1A       | 0.0001 |
| GNRHR        | 0.0001 |
| LOC220906    | 0.0001 |
| ERGIC3       | 0.0001 |
| RAVER1       | 0.0001 |
| HSPB6        | 0.0001 |
| C7orf28B     | 0.0001 |
| EPHA2        | 0.0001 |
| PTGDR2       | 0.0001 |
| ITGB5        | 0.0001 |
| HMBS         | 0.0001 |

|              |        |
|--------------|--------|
| SLC18A1      | 0.0001 |
| JPH2         | 0.0001 |
| ZNF229       | 0.0001 |
| LIME1        | 0.0001 |
| TMPRSS11D    | 0.0001 |
| BEX1         | 0.0001 |
| PROZ         | 0.0001 |
| PTBP3        | 0.0001 |
| TTBK2        | 0.0001 |
| L2HGDH       | 0.0001 |
| CRELD2       | 0.0001 |
| KIAA1804     | 0.0001 |
| AIP          | 0.0001 |
| JRK          | 0.0001 |
| SYN2         | 0.0001 |
| PHF8         | 0.0001 |
| ZNF284       | 0.0001 |
| BTNL2        | 0.0001 |
| UGT2A1       | 0.0001 |
| SPAM1        | 0.0001 |
| MRPS31       | 0.0001 |
| ALDH18A1     | 0.0001 |
| RHBDD2       | 0.0001 |
| GTSE1        | 0.0001 |
| SCAF8        | 0.0001 |
| LOC100131541 | 0.0001 |
| BRD4         | 0.0001 |
| TNK2         | 0.0001 |
| TPSAB1       | 0.0001 |
| SUV39H1      | 0.0001 |
| RBM7         | 0.0001 |
| AUTS2        | 0.0001 |
| CST6         | 0.0001 |
| DAOA-AS1     | 0.0001 |
| GPC2         | 0.0001 |
| SYNRG        | 0.0001 |
| ALDH1L1      | 0.0001 |
| LSM4         | 0.0001 |
| ZNF417       | 0.0001 |
| DAPK2        | 0.0001 |
| PHKB         | 0.0001 |
| GP6          | 0.0001 |
| GUSBP5       | 0.0001 |
| LINC00029    | 0.0001 |
| MCM10        | 0.0001 |
| CCZ1         | 0.0001 |

|              |        |
|--------------|--------|
| SAMD4B       | 0.0001 |
| SIGMAR1      | 0.0001 |
| EXD2         | 0.0001 |
| LOC100128737 | 0.0001 |
| RWDD1        | 0.0001 |
| LOC389023    | 0.0001 |
| WDTC1        | 0.0001 |
| DDX47        | 0.0001 |
| LOC100129387 | 0.0001 |
| PML          | 0.0001 |
| SEMA3A       | 0.0001 |
| PPM1M        | 0.0001 |
| FAM167B      | 0.0001 |
| WT1-AS       | 0.0001 |
| VAT1         | 0.0001 |
| ANK1         | 0.0001 |
| C7orf34      | 0.0001 |
| STK39        | 0.0001 |
| PGM3         | 0.0001 |
| TMX3         | 0.0001 |
| GPR172B      | 0.0001 |
| ADRA1D       | 0.0001 |
| CYP27B1      | 0.0001 |
| LOC100130285 | 0.0001 |
| GIT2         | 0.0001 |
| FGA          | 0.0001 |
| MAGED1       | 0.0001 |
| COX7A2L      | 0.0001 |
| OR5P3        | 0.0001 |
| LOC100131170 | 0.0001 |
| NDUFAB1      | 0.0001 |
| FOXL2        | 0.0001 |
| ZC3H15       | 0.0001 |
| tAKR         | 0.0001 |
| CLCN3        | 0.0001 |
| GLP2R        | 0.0001 |
| ACTN3        | 0.0001 |
| ARHGAP15     | 0.0001 |
| COPS7B       | 0.0001 |
| PKDCC        | 0.0001 |
| LOC100133315 | 0.0001 |
| KLF7         | 0.0001 |
| BAI1         | 0.0001 |
| LIMK1        | 0.0001 |
| DVL3         | 0.0001 |
| SKA3         | 0.0001 |



|           |        |
|-----------|--------|
| VPS33B    | 0.0001 |
| MRAS      | 0.0001 |
| LOC283089 | 0.0001 |
| MAPK1IP1L | 0.0001 |
| SFRP2     | 0.0001 |
| ATP7A     | 0.0001 |
| KIAA0196  | 0.0001 |
| DENND4C   | 0.0001 |
| CXorf23   | 0.0001 |
| LOC284889 | 0.0001 |
| NMNAT2    | 0.0001 |
| CNOT10    | 0.0001 |
| DLX2      | 0.0001 |
| LOC729852 | 0.0001 |
| KIR3DL1   | 0.0001 |
| NUDT2     | 0.0001 |
| AQP12A    | 0.0001 |
| KIAA1429  | 0.0001 |
| MTX1      | 0.0001 |
| RRAGB     | 0.0001 |
| PCDP1     | 0.0001 |
| ANKRD19P  | 0.0001 |
| ANKRD34B  | 0.0001 |
| AQP2      | 0.0001 |
| EIF5B     | 0.0001 |
| PFN3      | 0.0001 |
| NHLH1     | 0.0001 |
| PACS1     | 0.0001 |
| AURKA     | 0.0001 |
| CELF6     | 0.0001 |
| TREML4    | 0.0001 |
| LRP6      | 0.0001 |
| MYLK3     | 0.0001 |
| CCDC101   | 0.0001 |
| SLC6A11   | 0.0001 |
| PTH2      | 0.0001 |
| LOC643401 | 0.0001 |
| IP6K2     | 0.0001 |
| PNPLA4    | 0.0001 |
| IFNA8     | 0.0001 |
| CDH5      | 0.0001 |
| PIPOX     | 0.0001 |
| HS3ST4    | 0.0001 |
| FAM172A   | 0.0001 |
| TRAK2     | 0.0001 |
| SCTR      | 0.0001 |

|              |        |
|--------------|--------|
| VPRBP        | 0.0001 |
| ZNF430       | 0.0001 |
| GOLGA2       | 0.0001 |
| LOC100289361 | 0.0001 |
| TXN2         | 0.0001 |
| RAD23B       | 0.0001 |
| C9orf7       | 0.0001 |
| WFDC5        | 0.0001 |
| CLDND2       | 0.0001 |
| TNFSF9       | 0.0001 |
| 1/2-SBSRNA4  | 0.0001 |
| AIFM1        | 0.0001 |
| OPLAH        | 0.0001 |
| MESDC2       | 0.0001 |
| ZNF114       | 0.0001 |
| YAP1         | 0.0001 |
| UCK1         | 0.0001 |
| B3GALNT1     | 0.0001 |
| LOC100500938 | 0.0001 |
| GABBR1       | 0.0001 |
| PTCD3        | 0.0001 |
| SLC25A37     | 0.0001 |
| ACAP1        | 0.0001 |
| EFCAB1       | 0.0001 |
| CENPA        | 0.0001 |
| DYNC2H1      | 0.0001 |
| PAH          | 0.0001 |
| RABIF        | 0.0001 |
| KCNH3        | 0.0001 |
| FZD7         | 0.0001 |
| RAPSN        | 0.0001 |
| DOCK8        | 0.0001 |
| UNC5A        | 0.0001 |
| SLC6A10P     | 0.0001 |
| DNAJB1       | 0.0001 |
| FLJ30403     | 0.0001 |
| ZNF256       | 0.0001 |
| HPRT1        | 0.0001 |
| MATN2        | 0.0001 |
| NCAM2        | 0.0001 |
| BTBD3        | 0.0001 |
| ELN          | 0.0001 |
| LOC100507217 | 0.0001 |
| SCN3A        | 0.0001 |
| KCNJ3        | 0.0001 |
| C20orf7      | 0.0001 |

|          |        |
|----------|--------|
| DUT      | 0.0001 |
| PIP5K1C  | 0.0001 |
| C9orf114 | 0.0001 |
| GNGT1    | 0.0001 |
| KIAA1522 | 0.0001 |
| PAX8     | 0.0001 |
| MAN2C1   | 0.0001 |
| TOPBP1   | 0.0001 |
| IPO9     | 0.0001 |
| ANKRD27  | 0.0001 |
| ERG      | 0.0001 |
| THG1L    | 0.0001 |
| C5orf28  | 0.0001 |
| AMT      | 0.0001 |
| S100A13  | 0.0001 |
| SSNA1    | 0.0001 |
| FBN1     | 0.0001 |
| GRASP    | 0.0001 |
| CXorf22  | 0.0001 |
| PHF19    | 0.0001 |
| LUC7L    | 0.0001 |
| PRLH     | 0.0001 |
| PPM1K    | 0.0001 |
| MCM2     | 0.0001 |
| TBC1D3P5 | 0.0001 |
| IPO4     | 0.0001 |
| TMEM41B  | 0.0001 |
| GOLM1    | 0.0001 |
| SNX20    | 0.0001 |
| GOLGA6A  | 0.0001 |
| NUDT10   | 0.0001 |
| FAM175A  | 0.0001 |
| KIAA0753 | 0.0001 |
| FOXL1    | 0.0001 |
| IMPG1    | 0.0001 |
| NAT10    | 0.0001 |
| IGHMBP2  | 0.0001 |
| FLJ30679 | 0.0001 |
| RPS10P7  | 0.0001 |
| SLC26A2  | 0.0001 |
| PRB2     | 0.0001 |
| ARMC8    | 0.0001 |
| BAI3     | 0.0001 |
| SLFN13   | 0.0001 |
| GIMAP6   | 0.0001 |
| PMM2     | 0.0001 |

|           |        |
|-----------|--------|
| MAEA      | 0.0001 |
| PRG2      | 0.0001 |
| NBAS      | 0.0001 |
| OR6A2     | 0.0001 |
| SLC25A19  | 0.0001 |
| NAA10     | 0.0001 |
| CCNE1     | 0.0001 |
| GEMIN4    | 0.0001 |
| SCO1      | 0.0001 |
| NUMA1     | 0.0001 |
| PVRIG     | 0.0001 |
| DGUOK     | 0.0001 |
| LOC389332 | 0.0001 |
| NLRP7     | 0.0001 |
| KPTN      | 0.0001 |
| GRIA2     | 0.0001 |
| ADIPOR1   | 0.0001 |
| CTRB2     | 0.0001 |
| LOC494150 | 0.0001 |
| PRIM1     | 0.0001 |
| CCDC12    | 0.0001 |
| GHRLOS    | 0.0001 |
| PRSS22    | 0.0001 |
| KIAA0240  | 0.0001 |
| RSU1      | 0.0001 |
| PLA2G7    | 0.0001 |
| ZFPM2     | 0.0001 |
| PEG3-AS1  | 0.0001 |
| PLEKHA3   | 0.0001 |
| FGFR3     | 0.0001 |
| LINC00347 | 0.0001 |
| ZCCHC11   | 0.0001 |
| STAP1     | 0.0001 |
| B3GALT2   | 0.0001 |
| METTL2A   | 0.0001 |
| FLJ37453  | 0.0001 |
| XKR3      | 0.0001 |
| SMARCB1   | 0.0001 |
| FLJ26850  | 0.0001 |
| PLEKHG6   | 0.0001 |
| LYL1      | 0.0001 |
| KRTAP9-3  | 0.0001 |
| ENHO      | 0.0001 |
| BGN       | 0.0001 |
| SORCS1    | 0.0001 |
| PTAR1     | 0.0001 |

|              |        |
|--------------|--------|
| VHLL         | 0.0001 |
| ZNF155       | 0.0001 |
| ANKRD1       | 0.0001 |
| SERGEF       | 0.0001 |
| TRHDE        | 0.0001 |
| EPS8         | 0.0001 |
| ANKRD12      | 0.0001 |
| MED7         | 0.0001 |
| PHC1         | 0.0001 |
| ACTBL2       | 0.0001 |
| TCP10        | 0.0001 |
| TTI2         | 0.0001 |
| EVX1         | 0.0001 |
| SBNO1        | 0.0001 |
| LINC00305    | 0.0001 |
| AKAP8        | 0.0001 |
| TAF10        | 0.0001 |
| ITGA4        | 0.0001 |
| MYOZ2        | 0.0001 |
| C15orf17     | 0.0001 |
| RASD2        | 0.0001 |
| ZNF569       | 0.0001 |
| CRBN         | 0.0001 |
| MKNK1        | 0.0001 |
| FAM82B       | 0.0001 |
| BDKRB2       | 0.0001 |
| CARD14       | 0.0001 |
| CDKN2A       | 0.0001 |
| SCRN1        | 0.0001 |
| AGBL5        | 0.0001 |
| TXNDC15      | 0.0001 |
| TPRA1        | 0.0001 |
| ZNF682       | 0.0001 |
| PRO2012      | 0.0001 |
| QRFPR        | 0.0001 |
| CATSPER4     | 0.0001 |
| SEC63        | 0.0001 |
| ADAM33       | 0.0001 |
| MIF4GD       | 0.0001 |
| LOC100505540 | 0.0001 |
| SNPH         | 0.0001 |
| SEMA5B       | 0.0001 |
| KCND2        | 0.0001 |
| C14orf37     | 0.0001 |
| LGALS7       | 0.0001 |
| F12          | 0.0001 |

|              |        |
|--------------|--------|
| SEPT7P2      | 0.0001 |
| GTF2IRD2B    | 0.0001 |
| GUSBP1       | 0.0001 |
| ZBTB16       | 0.0001 |
| KLRK1        | 0.0001 |
| LPAR1        | 0.0001 |
| FBL          | 0.0001 |
| METTL19      | 0.0001 |
| GLT25D1      | 0.0001 |
| GTF2I        | 0.0001 |
| PHLDB2       | 0.0001 |
| NRSN1        | 0.0001 |
| DLD          | 0.0001 |
| KIAA1024L    | 0.0001 |
| CSMD3        | 0.0001 |
| HIBCH        | 0.0001 |
| NPHP1        | 0.0001 |
| SPOPL        | 0.0001 |
| TMEFF2       | 0.0001 |
| RPP21        | 0.0001 |
| NELL2        | 0.0001 |
| HOXB7        | 0.0001 |
| NBPF10       | 0.0001 |
| APOA1        | 0.0001 |
| SFN          | 0.0001 |
| STUB1        | 0.0001 |
| FBXL15       | 0.0001 |
| SP4          | 0.0001 |
| BDP1         | 0.0001 |
| WDYHV1       | 0.0001 |
| MTERFD1      | 0.0001 |
| LOC100506972 | 0.0001 |
| CARD17       | 0.0001 |
| C11orf93     | 0.0001 |
| LAT2         | 0.0001 |
| MANEAL       | 0.0001 |
| AGXT2L2      | 0.0001 |
| ZFAND3       | 0.0001 |
| KIF26A       | 0.0001 |
| FKBP9L       | 0.0001 |
| LOC388630    | 0.0001 |
| ZFP91        | 0.0001 |
| LINC00176    | 0.0001 |
| SYCN         | 0.0001 |
| LRRN3        | 0.0001 |
| CACNG3       | 0.0001 |

|              |        |
|--------------|--------|
| ANKRD30B     | 0.0001 |
| RAB9B        | 0.0001 |
| C7orf36      | 0.0001 |
| RERGL        | 0.0001 |
| METTL5       | 0.0001 |
| EXOC4        | 0.0001 |
| FRY          | 0.0001 |
| DRAP1        | 0.0001 |
| MSRA         | 0.0001 |
| CEP85        | 0.0001 |
| OLFM3        | 0.0001 |
| FAM124B      | 0.0001 |
| USP29        | 0.0001 |
| SCT          | 0.0001 |
| ZDHH8P1      | 0.0001 |
| GPR27        | 0.0001 |
| ZNF471       | 0.0001 |
| RBMXL2       | 0.0001 |
| RGS1         | 0.0001 |
| KDM2A        | 0.0001 |
| TSC2         | 0.0001 |
| LRIG1        | 0.0001 |
| MPST         | 0.0001 |
| LCE2D        | 0.0001 |
| AARS         | 0.0001 |
| BPIFB6       | 0.0001 |
| ZNF687       | 0.0001 |
| CRYBA4       | 0.0001 |
| INADL        | 0.0001 |
| SPRN         | 0.0001 |
| TMCO7        | 0.0001 |
| ACCN1        | 0.0001 |
| TRMT6        | 0.0001 |
| LOC100128775 | 0.0001 |
| OTUD4        | 0.0001 |
| GNPAT        | 0.0001 |
| AKR1C1       | 0.0001 |
| RPL34        | 0.0001 |
| ZNF75D       | 0.0001 |
| EGFR         | 0.0001 |
| NPC1L1       | 0.0001 |
| HAUS3        | 0.0001 |
| SP7          | 0.0001 |
| FETUB        | 0.0001 |
| HOXB4        | 0.0001 |
| KANSL3       | 0.0001 |

|           |        |
|-----------|--------|
| OR3A1     | 0.0001 |
| CERS5     | 0.0001 |
| UBE2D3    | 0.0001 |
| SUGP2     | 0.0001 |
| IGFBP4    | 0.0001 |
| TAS2R8    | 0.0001 |
| CTF1      | 0.0001 |
| ACTA1     | 0.0001 |
| ADCK2     | 0.0001 |
| INO80E    | 0.0001 |
| FOS       | 0.0001 |
| MAGI2-AS3 | 0.0001 |
| LOC145694 | 0.0001 |
| SLIT2-IT1 | 0.0001 |
| ICA1L     | 0.0001 |
| PIK3CD    | 0.0001 |
| NCR2      | 0.0001 |
| SLC30A9   | 0.0001 |
| SESN1     | 0.0001 |
| ATE1      | 0.0001 |
| SGOL2     | 0.0001 |
| HDGF      | 0.0001 |
| CRB2      | 0.0001 |
| UNC5C     | 0.0001 |
| EIF4B     | 0.0001 |
| HOXC11    | 0.0001 |
| TRIM47    | 0.0001 |
| SCGB1A1   | 0.0001 |
| NUP98     | 0.0001 |
| PDPN      | 0.0001 |
| KATNA1    | 0.0001 |
| LOC641746 | 0.0001 |
| KISS1     | 0.0001 |
| CD40LG    | 0.0001 |
| SERTAD3   | 0.0001 |
| ZNF350    | 0.0001 |
| FOXJ3     | 0.0001 |
| VASH1     | 0.0001 |
| TM2D2     | 0.0001 |
| CFP       | 0.0001 |
| PHC3      | 0.0001 |
| VMP1      | 0.0001 |
| TXNRD2    | 0.0001 |
| ANKS4B    | 0.0001 |
| CBX6      | 0.0001 |
| LCAT      | 0.0001 |



|           |        |
|-----------|--------|
| TMPRSS2   | 0.0001 |
| NPPB      | 0.0001 |
| C1orf183  | 0.0001 |
| GOLGA8E   | 0.0001 |
| CD101     | 0.0001 |
| USP54     | 0.0001 |
| CYP3A4    | 0.0001 |
| CLCN6     | 0.0001 |
| ARMCX5    | 0.0001 |
| GPR77     | 0.0001 |
| AGPAT6    | 0.0001 |
| IFFO2     | 0.0001 |
| SNAI3     | 0.0001 |
| RAB36     | 0.0001 |
| FAM187B   | 0.0001 |
| NUP160    | 0.0001 |
| RAB14     | 0.0001 |
| PDIA5     | 0.0001 |
| FBXW4     | 0.0001 |
| IL9       | 0.0001 |
| ZNF431    | 0.0001 |
| KRCC1     | 0.0001 |
| MAGEC3    | 0.0001 |
| SLC22A17  | 0.0001 |
| BRSK1     | 0.0001 |
| EXTL3     | 0.0001 |
| C14orf45  | 0.0001 |
| CCDC73    | 0.0001 |
| RGN       | 0.0001 |
| EPN3      | 0.0001 |
| DLX5      | 0.0001 |
| THAP9     | 0.0001 |
| C4orf41   | 0.0001 |
| C20orf11  | 0.0001 |
| TSLP      | 0.0001 |
| TBC1D3B   | 0.0001 |
| LINC00086 | 0.0001 |
| TP53INP1  | 0.0001 |
| SCAPER    | 0.0001 |
| PJA2      | 0.0001 |
| FPR3      | 0.0001 |
| PIGQ      | 0.0001 |
| KIAA0907  | 0.0001 |
| FAM73A    | 0.0001 |
| BUB1      | 0.0001 |
| MCMBP     | 0.0001 |

|          |        |
|----------|--------|
| TAF5L    | 0.0001 |
| PINK1    | 0.0001 |
| SSTR2    | 0.0001 |
| C1orf114 | 0.0001 |
| GORASP2  | 0.0001 |
| ASAH1    | 0.0001 |
| PRSS56   | 0.0001 |
| IL31     | 0.0001 |
| HADHA    | 0.0001 |
| LPAR6    | 0.0001 |
| CASR     | 0.0001 |
| NUDCD1   | 0.0001 |
| PTGES2   | 0.0001 |
| MRPS18C  | 0.0001 |
| RSAD1    | 0.0001 |
| RNF215   | 0.0001 |
| NR1D2    | 0.0001 |
| PSMA3    | 0.0001 |
| TOR1AIP1 | 0.0001 |
| RAG2     | 0.0001 |
| CCDC111  | 0.0001 |
| MYOZ1    | 0.0001 |
| MOB1A    | 0.0001 |
| ABCA3    | 0.0001 |
| GYPA     | 0.0001 |
| DDX21    | 0.0001 |
| MRPL46   | 0.0001 |
| PRRG4    | 0.0001 |
| GATA5    | 0.0001 |
| NLE1     | 0.0001 |
| FAM96B   | 0.0001 |
| ZNF668   | 0.0001 |
| VCAM1    | 0.0001 |
| ZSCAN4   | 0.0001 |
| PLEKHG1  | 0.0001 |
| SERPINE1 | 0.0001 |
| PRR11    | 0.0001 |
| MRPS9    | 0.0001 |
| CLDN15   | 0.0001 |
| LRRC15   | 0.0001 |
| FAM50A   | 0.0001 |
| DAGLA    | 0.0001 |
| CLEC10A  | 0.0001 |
| DENND2D  | 0.0001 |
| GOT2     | 0.0001 |
| RANBP3L  | 0.0001 |

|              |        |
|--------------|--------|
| MMP27        | 0.0001 |
| FDX1L        | 0.0001 |
| ENTPD6       | 0.0001 |
| NECAP1       | 0.0001 |
| PSG2         | 0.0001 |
| C11orf42     | 0.0001 |
| KLF13        | 0.0001 |
| KIF4A        | 0.0001 |
| RAF1         | 0.0001 |
| TELO2        | 0.0001 |
| YIPF5        | 0.0001 |
| VKORC1       | 0.0001 |
| OVCA2        | 0.0001 |
| FLJ12825     | 0.0001 |
| MRPL1        | 0.0001 |
| OTUD7A       | 0.0001 |
| ABHD6        | 0.0001 |
| BUD31        | 0.0001 |
| PHOSPHO1     | 0.0001 |
| MAP2K5       | 0.0001 |
| SCYL3        | 0.0001 |
| TTY13        | 0.0001 |
| NT5DC3       | 0.0001 |
| STOX1        | 0.0001 |
| HUS1         | 0.0001 |
| HIVEP3       | 0.0001 |
| KRT26        | 0.0001 |
| LTBP2        | 0.0001 |
| DOCK5        | 0.0001 |
| C19orf33     | 0.0001 |
| LOC100652828 | 0.0001 |
| UBE2G2       | 0.0001 |
| LRRC16A      | 0.0001 |
| TRAF3IP3     | 0.0001 |
| ATP11B       | 0.0001 |
| MATK         | 0.0001 |
| KAT2B        | 0.0001 |
| IL7          | 0.0001 |
| C19orf42     | 0.0001 |
| EPHA4        | 0.0001 |
| CNO          | 0.0001 |
| KCNE1L       | 0.0001 |
| FUS          | 0.0001 |
| SNHG12       | 0.0001 |
| C17orf85     | 0.0001 |
| ZKSCAN3      | 0.0001 |

|              |        |
|--------------|--------|
| SIRPD        | 0.0001 |
| TMCO5A       | 0.0001 |
| ANXA11       | 0.0001 |
| C9orf5       | 0.0001 |
| PRKD1        | 0.0001 |
| NTN3         | 0.0001 |
| UTF1         | 0.0001 |
| LEFTY2       | 0.0001 |
| FLJ10038     | 0.0001 |
| PPFIA3       | 0.0001 |
| LOC254057    | 0.0001 |
| BABAM1       | 0.0001 |
| EGR1         | 0.0001 |
| C14orf142    | 0.0001 |
| M6PR         | 0.0001 |
| C16orf13     | 0.0001 |
| CDH8         | 0.0001 |
| LOC389705    | 0.0001 |
| C2CD4C       | 0.0001 |
| HLA-DQA2     | 0.0001 |
| C11orf73     | 0.0001 |
| NEIL3        | 0.0001 |
| RLN2         | 0.0001 |
| WDR93        | 0.0001 |
| C21orf128    | 0.0001 |
| ZSCAN2       | 0.0001 |
| FXN          | 0.0001 |
| GRWD1        | 0.0001 |
| LSM11        | 0.0001 |
| SLC11A1      | 0.0001 |
| ASNSD1       | 0.0001 |
| TONSL        | 0.0001 |
| MIR17HG      | 0.0001 |
| ZNF292       | 0.0001 |
| OR10J1       | 0.0001 |
| LOC100652791 | 0.0001 |
| PIGS         | 0.0001 |
| AQP9         | 0.0001 |
| DNAH10       | 0.0001 |
| STXBP5       | 0.0001 |
| ALS2CR8      | 0.0001 |
| GPN1         | 0.0001 |
| CYYR1        | 0.0001 |
| APEX1        | 0.0001 |
| CDX1         | 0.0001 |
| SDHAF1       | 0.0001 |

|              |        |
|--------------|--------|
| WFDC11       | 0.0001 |
| EVI2A        | 0.0001 |
| ADAM21       | 0.0001 |
| C9orf25      | 0.0001 |
| TSR2         | 0.0001 |
| BRAF         | 0.0001 |
| HAT1         | 0.0001 |
| ZBBX         | 0.0001 |
| FAM19A5      | 0.0001 |
| PLEKHM3      | 0.0001 |
| PAPSS2       | 0.0001 |
| GNAL         | 0.0001 |
| ANGEL2       | 0.0001 |
| HTRA4        | 0.0001 |
| RNPC3        | 0.0001 |
| MUC3         | 0.0001 |
| TMEM114      | 0.0001 |
| HSD17B1      | 0.0001 |
| LOC100128420 | 0.0001 |
| DAAM2        | 0.0001 |
| GREM2        | 0.0001 |
| C18orf56     | 0.0001 |
| LINC00421    | 0.0001 |
| SOD1         | 0.0001 |
| SEC31A       | 0.0001 |
| CD37         | 0.0001 |
| GPR133       | 0.0001 |
| TNFRSF19     | 0.0001 |
| EEF1G        | 0.0001 |
| C8orf47      | 0.0001 |
| MGC10814     | 0.0001 |
| ECEL1        | 0.0001 |
| SPIRE2       | 0.0001 |
| CDH19        | 0.0001 |
| HNF1A        | 0.0001 |
| DLX6         | 0.0001 |
| HPS5         | 0.0001 |
| LOC100506929 | 0.0001 |
| CAMKK1       | 0.0001 |
| IGSF1        | 0.0001 |
| INPP5E       | 0.0001 |
| ABCG8        | 0.0001 |
| PGLYRP4      | 0.0001 |
| TOM1L1       | 0.0001 |
| RRP9         | 0.0001 |
| NUP54        | 0.0001 |

|              |        |
|--------------|--------|
| PSG5         | 0.0001 |
| MCF2L2       | 0.0001 |
| ERGIC2       | 0.0001 |
| YTHDF2       | 0.0001 |
| ERICH1       | 0.0001 |
| N4BP2L1      | 0.0001 |
| ZFYVE19      | 0.0001 |
| TUBB4B       | 0.0001 |
| NUP62CL      | 0.0001 |
| RNF213       | 0.0001 |
| MRPL49       | 0.0001 |
| THAP11       | 0.0001 |
| PLIN1        | 0.0001 |
| SLC31A2      | 0.0001 |
| TMEM132C     | 0.0001 |
| LOC100306975 | 0.0001 |
| HLF          | 0.0001 |
| CHST7        | 0.0001 |
| DKFZP564C152 | 0.0001 |
| TRAM2        | 0.0001 |
| CIAPIN1      | 0.0001 |
| LOC100129973 | 0.0001 |
| AZI2         | 0.0001 |
| PCSK4        | 0.0001 |
| ZNF433       | 0.0001 |
| DSG3         | 0.0001 |
| RNF121       | 0.0001 |
| PSME4        | 0.0001 |
| UBA1         | 0.0001 |
| CXCL17       | 0.0001 |
| ARNT2        | 0.0001 |
| C20orf29     | 0.0001 |
| FLVCR1       | 0.0001 |
| MYL6B        | 0.0001 |
| THAP1        | 0.0001 |
| CHML         | 0.0001 |
| PYCR1        | 0.0001 |
| ZNF776       | 0.0001 |
| TIMM8A       | 0.0001 |
| KIAA1383     | 0.0001 |
| OR12D3       | 0.0001 |
| HIPK3        | 0.0001 |
| RPP25        | 0.0001 |
| ZNF20        | 0.0001 |
| ZNF585B      | 0.0001 |
| RGS7         | 0.0001 |

|               |        |
|---------------|--------|
| MRPL37        | 0.0001 |
| ONECUT2       | 0.0001 |
| ZNF700        | 0.0001 |
| LRIT2         | 0.0001 |
| SLC41A1       | 0.0001 |
| TMEM99        | 0.0001 |
| GPAA1         | 0.0001 |
| HOXC6         | 0.0001 |
| ZIC5          | 0.0001 |
| ASPH          | 0.0001 |
| MED30         | 0.0001 |
| ITFG1         | 0.0001 |
| LOC100129104  | 0.0001 |
| SOX12         | 0.0001 |
| RPL39L        | 0.0001 |
| SPINLW1-WFDC6 | 0.0001 |
| T             | 0.0001 |
| PLCG2         | 0.0001 |
| TIRAP         | 0.0001 |
| NLRP1         | 0.0001 |
| PBX3          | 0.0001 |
| CTSE          | 0.0001 |
| CREBL2        | 0.0001 |
| LGALS9C       | 0.0001 |
| DUSP15        | 0.0001 |
| ANXA5         | 0.0001 |
| EXOC2         | 0.0001 |
| CLTA          | 0.0001 |
| IMPG2         | 0.0001 |
| BAIAP3        | 0.0001 |
| MRPS18B       | 0.0001 |
| SGK196        | 0.0001 |
| CRYGC         | 0.0001 |
| ATP5E         | 0.0001 |
| PDE8B         | 0.0001 |
| DAK           | 0.0001 |
| TTC22         | 0.0001 |
| F10           | 0.0001 |
| TMC6          | 0.0001 |
| ZNF492        | 0.0001 |
| LOC100505549  | 0.0001 |
| MGA           | 0.0001 |
| TSPAN15       | 0.0001 |
| UBL4A         | 0.0001 |
| CASQ2         | 0.0001 |
| ZNF835        | 0.0001 |

|           |        |
|-----------|--------|
| PDIA3     | 0.0001 |
| DLG4      | 0.0001 |
| ZNF792    | 0.0001 |
| BNIP2     | 0.0001 |
| ODF3L1    | 0.0001 |
| WWP2      | 0.0001 |
| TUBGCP3   | 0.0001 |
| NPLOC4    | 0.0001 |
| FKBP10    | 0.0001 |
| POFUT1    | 0.0001 |
| SLC25A1   | 0.0001 |
| KIAA0913  | 0.0001 |
| AEN       | 0.0001 |
| MXRA8     | 0.0001 |
| ATG16L2   | 0.0001 |
| PDE10A    | 0.0001 |
| NOTCH4    | 0.0001 |
| UBXN7     | 0.0001 |
| CSTB      | 0.0001 |
| TMUB2     | 0.0001 |
| METTL7B   | 0.0001 |
| NOVA2     | 0.0001 |
| LRRC37A2  | 0.0001 |
| BBIP1     | 0.0001 |
| KRT73     | 0.0001 |
| SEC31B    | 0.0001 |
| LOC440434 | 0.0001 |
| FBXW4P1   | 0.0001 |
| RANBP2    | 0.0001 |
| C1orf116  | 0.0001 |
| TMEM155   | 0.0001 |
| C9orf72   | 0.0001 |
| CES3      | 0.0001 |
| CLNS1A    | 0.0001 |
| HEMK1     | 0.0001 |
| NOS3      | 0.0001 |
| TTY8      | 0.0001 |
| LOC257358 | 0.0001 |
| DNAJC10   | 0.0001 |
| CBX1      | 0.0001 |
| SEL1L3    | 0.0001 |
| ANP32E    | 0.0001 |
| STGC3     | 0.0001 |
| PRDM15    | 0.0001 |
| HNRNPUL1  | 0.0001 |
| ZNF226    | 0.0001 |



|          |        |
|----------|--------|
| ZNF726   | 0.0001 |
| ACN9     | 0.0001 |
| TSNAX    | 0.0001 |
| KIAA1239 | 0.0001 |
| C1orf65  | 0.0001 |
| CALB1    | 0.0001 |
| DDX56    | 0.0001 |
| GSDMB    | 0.0001 |
| RAB11B   | 0.0001 |
| PKIA     | 0.0001 |
| DACH1    | 0.0001 |
| EIF3I    | 0.0001 |
| ADRBK2   | 0.0001 |
| ARHGEF2  | 0.0001 |
| TNRC6A   | 0.0001 |
| KIAA1661 | 0.0001 |
| ISLR     | 0.0001 |
| DCTN5    | 0.0001 |
| LRGUK    | 0.0001 |
| SNTB2    | 0.0001 |
| GBX1     | 0.0001 |
| FBXL17   | 0.0001 |
| SLC22A7  | 0.0001 |
| PLD6     | 0.0001 |
| CHRNA2   | 0.0001 |
| SYN3     | 0.0001 |
| MAP3K2   | 0.0001 |
| DACT3    | 0.0001 |
| KDM4D    | 0.0001 |
| PTPRCAP  | 0.0001 |
| MUM1     | 0.0001 |
| ZNF24    | 0.0001 |
| PTP4A2   | 0.0001 |
| NRF1     | 0.0001 |
| SLC35A1  | 0.0001 |
| PALM2    | 0.0001 |
| PRRX1    | 0.0001 |
| CCDC141  | 0.0001 |
| SLC19A1  | 0.0001 |
| KIF21B   | 0.0001 |
| CDH2     | 0.0001 |
| GBE1     | 0.0001 |
| PGF      | 0.0001 |
| ZNF420   | 0.0001 |
| HELB     | 0.0001 |
| ZDHHC9   | 0.0001 |

|              |        |
|--------------|--------|
| CYB561D2     | 0.0001 |
| SLC24A4      | 0.0001 |
| LPGAT1       | 0.0001 |
| TMEM131      | 0.0001 |
| B3GNT1       | 0.0001 |
| ARFGEF1      | 0.0001 |
| CCDC169      | 0.0001 |
| NIPA1        | 0.0001 |
| UBLCP1       | 0.0001 |
| TTC28-AS1    | 0.0001 |
| NEDD1        | 0.0001 |
| LOC100506195 | 0.0001 |
| SLCO4C1      | 0.0001 |
| LOC100129726 | 0.0001 |
| LOC729080    | 0.0001 |
| PPOX         | 0.0001 |
| SGCA         | 0.0001 |
| NKX6-2       | 0.0001 |
| LOC643037    | 0.0001 |
| PPIL3        | 0.0001 |
| VDR          | 0.0001 |
| B4GALT2      | 0.0001 |
| KLHL7        | 0.0001 |
| DPAGT1       | 0.0001 |
| PRMT1        | 0.0001 |
| MAGEB18      | 0.0001 |
| FAM195B      | 0.0001 |
| KDM4A        | 0.0001 |
| MAN1A1       | 0.0001 |
| FGF19        | 0.0001 |
| REXO2        | 0.0001 |
| VPS53        | 0.0001 |
| LOC157740    | 0.0001 |
| ZNF396       | 0.0001 |
| ADAMTS17     | 0.0001 |
| OSMR         | 0.0001 |
| TRMT1        | 0.0001 |
| OXCT1        | 0.0001 |
| KRT38        | 0.0001 |
| RFC4         | 0.0001 |
| GPR182       | 0.0001 |
| COX8A        | 0.0001 |
| PIP5K1       | 0.0001 |
| SFRP4        | 0.0001 |
| SYNDIG1      | 0.0001 |
| ASH2L        | 0.0001 |

|              |        |
|--------------|--------|
| MRPS7        | 0.0001 |
| HIST1H3H     | 0.0001 |
| POF1B        | 0.0001 |
| LRIG3        | 0.0001 |
| C5orf34      | 0.0001 |
| TMCC1        | 0.0001 |
| KIR2DS4      | 0.0001 |
| C11orf88     | 0.0001 |
| MZB1         | 0.0001 |
| CDCA4        | 0.0001 |
| MXI1         | 0.0001 |
| LINC00246A   | 0.0001 |
| ULK2         | 0.0001 |
| CT45A5       | 0.0001 |
| MGC42157     | 0.0001 |
| FAM122B      | 0.0001 |
| ZNF831       | 0.0001 |
| CMTM4        | 0.0001 |
| SMARCE1      | 0.0001 |
| GHR          | 0.0001 |
| PCSK6        | 0.0001 |
| CSNK1A1P1    | 0.0001 |
| CHERP        | 0.0001 |
| AGPAT1       | 0.0001 |
| CD2AP        | 0.0001 |
| MAP3K9       | 0.0001 |
| FAM117B      | 0.0001 |
| CDK19        | 0.0001 |
| MACROD2      | 0.0001 |
| SULT2B1      | 0.0001 |
| ZNF622       | 0.0001 |
| LHFPL2       | 0.0001 |
| DDRKG1       | 0.0001 |
| CIDEB        | 0.0001 |
| FAHD2A       | 0.0001 |
| LOC100131508 | 0.0001 |
| GFOD2        | 0.0001 |
| SUDS3        | 0.0001 |
| ARHGAP25     | 0.0001 |
| RPGR         | 0.0001 |
| CECR6        | 0.0001 |
| TEKT1        | 0.0001 |
| ZNF586       | 0.0001 |
| CIB3         | 0.0001 |
| SH2D4A       | 0.0001 |
| PDE6C        | 0.0001 |

|              |        |
|--------------|--------|
| MTFMT        | 0.0001 |
| ACTR10       | 0.0001 |
| WFIKKN1      | 0.0001 |
| ARTN         | 0.0001 |
| NSA2         | 0.0001 |
| WWTR1        | 0.0001 |
| KIRREL       | 0.0001 |
| SLC16A14     | 0.0001 |
| SBK2         | 0.0001 |
| PTDSS1       | 0.0001 |
| GLYATL1      | 0.0001 |
| BPTF         | 0.0001 |
| ORC1         | 0.0001 |
| COX15        | 0.0001 |
| SMAD2        | 0.0001 |
| ZFAND5       | 0.0001 |
| HSP90AB1     | 0.0001 |
| CECR7        | 0.0001 |
| SNIP1        | 0.0001 |
| FUCA2        | 0.0001 |
| LOC100506758 | 0.0001 |
| LOC100129515 | 0.0001 |
| HCK          | 0.0001 |
| GPR150       | 0.0001 |
| KCMF1        | 0.0001 |
| MS4A1        | 0.0001 |
| DUOXA1       | 0.0001 |
| NKX3-2       | 0.0001 |
| PTCD1        | 0.0001 |
| SLC39A3      | 0.0001 |
| CTAG1A       | 0.0001 |
| SLC22A1      | 0.0001 |
| LLGL2        | 0.0001 |
| C11orf1      | 0.0001 |
| MUC5B        | 0.0001 |
| PION         | 0.0001 |
| ARMC2        | 0.0001 |
| PPP1R14D     | 0.0001 |
| OR10P1       | 0.0001 |
| CXXC1        | 0.0001 |
| PSMA6        | 0.0001 |
| SPEF2        | 0.0001 |
| FKSG2        | 0.0001 |
| FGD5         | 0.0001 |
| CLEC3A       | 0.0001 |
| SUCLG1       | 0.0001 |

|            |        |
|------------|--------|
| SPTBN2     | 0.0001 |
| MUC7       | 0.0001 |
| B3GNT5     | 0.0001 |
| GABARAPL2  | 0.0001 |
| STEAP1     | 0.0001 |
| LINC00204B | 0.0001 |
| KLC4       | 0.0001 |
| KCNMB2     | 0.0001 |
| PPPDE1     | 0.0001 |
| PANK4      | 0.0001 |
| CDK5RAP3   | 0.0001 |
| C16orf61   | 0.0001 |
| ATPIF1     | 0.0001 |
| ZNF91      | 0.0001 |
| AP4E1      | 0.0001 |
| UBQLN3     | 0.0001 |
| LIPF       | 0.0001 |
| MGC57346   | 0.0001 |
| MIOX       | 0.0001 |
| CKM        | 0.0001 |
| SETD4      | 0.0001 |
| CLDN3      | 0.0001 |
| EIF3E      | 0.0001 |
| POLR2A     | 0.0001 |
| CAPG       | 0.0001 |
| MFI2       | 0.0001 |
| TMEM150A   | 0.0001 |
| SLC7A6     | 0.0001 |
| PMF1       | 0.0001 |
| ZNF8       | 0.0001 |
| ANKRD20A2  | 0.0001 |
| ARID2      | 0.0001 |
| NAGS       | 0.0001 |
| SARS       | 0.0001 |
| TDO2       | 0.0001 |
| KY         | 0.0001 |
| RRN3       | 0.0001 |
| FLJ32756   | 0.0001 |
| SEPP1      | 0.0001 |
| C9orf37    | 0.0001 |
| MIB1       | 0.0001 |
| THAP8      | 0.0001 |
| HOGA1      | 0.0001 |
| NCSTN      | 0.0001 |
| KPNA3      | 0.0001 |
| KRT37      | 0.0001 |

|           |        |
|-----------|--------|
| TBC1D22B  | 0.0001 |
| RGP1      | 0.0001 |
| NUDT4     | 0.0001 |
| MRFAP1    | 0.0001 |
| CD1E      | 0.0001 |
| LOC254128 | 0.0001 |
| CUL4A     | 0.0001 |
| IL22RA1   | 0.0001 |
| MUC13     | 0.0001 |
| FAM47E    | 0.0001 |
| HPCAL4    | 0.0001 |
| APOE      | 0.0001 |
| TBC1D7    | 0.0001 |
| C2CD2L    | 0.0001 |
| PPP2R5E   | 0.0001 |
| GPNMB     | 0.0001 |
| CALD1     | 0.0001 |
| CCDC61    | 0.0001 |
| PPP2R2B   | 0.0001 |
| MIR210HG  | 0.0001 |
| RPL13AP3  | 0.0001 |
| FGGY      | 0.0001 |
| GRAMD2    | 0.0001 |
| RIMBP3    | 0.0001 |
| LOC148709 | 0.0001 |
| GNAT1     | 0.0001 |
| PTMS      | 0.0001 |
| AGK       | 0.0001 |
| MRPS35    | 0.0001 |
| THEM5     | 0.0001 |
| CSRP1     | 0.0001 |
| SCN4A     | 0.0001 |
| SETP4     | 0.0001 |
| TEKT4     | 0.0001 |
| LOC152217 | 0.0001 |
| AASDHPPT  | 0.0001 |
| DRD5      | 0.0001 |
| RGR       | 0.0001 |
| ENC1      | 0.0001 |
| FOXP3     | 0.0001 |
| PPP2CA    | 0.0001 |
| TFDP3     | 0.0001 |
| OIT3      | 0.0001 |
| C1orf213  | 0.0001 |
| CASP3     | 0.0001 |
| PAGE5     | 0.0001 |

|              |        |
|--------------|--------|
| RUNDC3B      | 0.0001 |
| ZNF732       | 0.0001 |
| LOC100190939 | 0.0001 |
| TMUB1        | 0.0001 |
| ARCN1        | 0.0001 |
| MRPL50       | 0.0001 |
| PDRG1        | 0.0001 |
| SARDH        | 0.0001 |
| ARL16        | 0.0001 |
| TCP11L2      | 0.0001 |
| CREB3L1      | 0.0001 |
| HOXC13       | 0.0001 |
| LOC100505616 | 0.0001 |
| ADAP2        | 0.0001 |
| XPA          | 0.0001 |
| LOC157627    | 0.0001 |
| FOXI1        | 0.0001 |
| ZNF808       | 0.0001 |
| PDXP         | 0.0001 |
| FAM105A      | 0.0001 |
| CSTF3        | 0.0001 |
| CORO7        | 0.0001 |
| CTU2         | 0.0001 |
| FAM108B1     | 0.0001 |
| CALHM2       | 0.0001 |
| C2orf66      | 0.0001 |
| C7orf62      | 0.0001 |
| UBE2T        | 0.0001 |
| CCNG1        | 0.0001 |
| LIN28B       | 0.0001 |
| UBXN2B       | 0.0001 |
| RFPL1        | 0.0001 |
| CLEC4F       | 0.0001 |
| DOK7         | 0.0001 |
| OR2C1        | 0.0001 |
| AQP7P1       | 0.0001 |
| KIAA0895     | 0.0001 |
| C10orf93     | 0.0001 |
| ERBB2        | 0.0001 |
| C1orf186     | 0.0001 |
| SSX3         | 0.0001 |
| PPM1N        | 0.0001 |
| SLC36A4      | 0.0001 |
| TECTB        | 0.0001 |
| CR2          | 0.0001 |
| PTGIS        | 0.0001 |

|              |        |
|--------------|--------|
| MYL4         | 0.0001 |
| SAA3P        | 0.0001 |
| LOC100130924 | 0.0001 |
| ULBP1        | 0.0001 |
| LRRN4        | 0.0001 |
| LDB3         | 0.0001 |
| ZNF593       | 0.0001 |
| C20orf201    | 0.0001 |
| SLC25A36     | 0.0001 |
| CNGB1        | 0.0001 |
| TMEM25       | 0.0001 |
| JAKMIP1      | 0.0001 |
| MOBP         | 0.0001 |
| PLEC         | 0.0001 |
| RNF25        | 0.0001 |
| OR3A2        | 0.0001 |
| SKAP2        | 0.0001 |
| C10orf95     | 0.0001 |
| OSBPL5       | 0.0001 |
| RCOR2        | 0.0001 |
| SURF6        | 0.0001 |
| PEX5         | 0.0001 |
| KCNIP1       | 0.0001 |
| CARS         | 0.0001 |
| KCNMB3       | 0.0001 |
| PLAC4        | 0.0001 |
| ZNF714       | 0.0001 |
| CDCA3        | 0.0001 |
| ZHX3         | 0.0001 |
| IP6K1        | 0.0001 |
| CYP3A7       | 0.0001 |
| HDAC1        | 0.0001 |
| GTF3C3       | 0.0001 |
| PHF20        | 0.0001 |
| C14orf133    | 0.0001 |
| TPM2         | 0.0001 |
| MKRN9P       | 0.0001 |
| AOC2         | 0.0001 |
| TMEM214      | 0.0001 |
| TMPRSS11A    | 0.0001 |
| CTAGE15P     | 0.0001 |
| ZNF529       | 0.0001 |
| DIP2C        | 0.0001 |
| PRR5-ARHGAP8 | 0.0001 |
| DYX1C1       | 0.0001 |
| ZNF564       | 0.0001 |



|              |        |
|--------------|--------|
| LOC649395    | 0.0001 |
| CD151        | 0.0001 |
| CHPF2        | 0.0001 |
| COX17        | 0.0001 |
| C16orf53     | 0.0001 |
| KIR2DL5A     | 0.0001 |
| IVD          | 0.0001 |
| LRRC3B       | 0.0001 |
| LOC100507049 | 0.0001 |
| C11orf84     | 0.0001 |
| SLC2A2       | 0.0001 |
| MBTD1        | 0.0001 |
| KCTD17       | 0.0001 |
| TAX1BP3      | 0.0001 |
| SRCAP        | 0.0001 |
| DLGAP3       | 0.0001 |
| WDR7         | 0.0001 |
| PDGFB        | 0.0001 |
| LUZP4        | 0.0001 |
| MAP3K1       | 0.0001 |
| ZNF644       | 0.0001 |
| PCSK2        | 0.0001 |
| CENPP        | 0.0001 |
| MAGEB3       | 0.0001 |
| CAB39        | 0.0001 |
| SPOCD1       | 0.0001 |
| MBOAT1       | 0.0001 |
| HSPA8        | 0.0001 |
| P2RX3        | 0.0001 |
| KCTD16       | 0.0001 |
| TAS2R43      | 0.0001 |
| LRRC58       | 0.0001 |
| TRIM41       | 0.0001 |
| RGAG4        | 0.0001 |
| C2orf57      | 0.0001 |
| FAM55A       | 0.0001 |
| NR1I3        | 0.0001 |
| TFAP2E       | 0.0001 |
| PLXNB2       | 0.0001 |
| MTPAP        | 0.0001 |
| MLLT1        | 0.0001 |
| STK19        | 0.0001 |
| ZNF239       | 0.0001 |
| FAM204A      | 0.0001 |
| SPANXA1      | 0.0001 |
| C10orf68     | 0.0001 |

|              |        |
|--------------|--------|
| LZTS1        | 0.0001 |
| SLC15A1      | 0.0001 |
| GNG12        | 0.0001 |
| LOC100506965 | 0.0001 |
| GJA10        | 0.0001 |
| TLR7         | 0.0001 |
| MYO1C        | 0.0001 |
| TIMELESS     | 0.0001 |
| COL10A1      | 0.0001 |
| ASB11        | 0.0001 |
| SVEP1        | 0.0001 |
| PIK3R5       | 0.0001 |
| PLA2G5       | 0.0001 |
| BHLHB9       | 0.0001 |
| OSBPL10      | 0.0001 |
| POPDC3       | 0.0001 |
| PTPRZ1       | 0.0001 |
| RLBP1        | 0.0001 |
| AGRP         | 0.0001 |
| UNC93B1      | 0.0001 |
| SLITRK3      | 0.0001 |
| CHMP4A       | 0.0001 |
| UBE2S        | 0.0001 |
| NBL1         | 0.0001 |
| SUMF2        | 0.0001 |
| MSMB         | 0.0001 |
| C22orf31     | 0.0001 |
| MMP26        | 0.0001 |
| MAF1         | 0.0001 |
| TNXB         | 0.0001 |
| ZNF157       | 0.0001 |
| DNASE1L1     | 0.0001 |
| LIG1         | 0.0001 |
| OR10J3       | 0.0001 |
| CD3G         | 0.0001 |
| ZC4H2        | 0.0001 |
| ORC5         | 0.0001 |
| ARID3A       | 0.0001 |
| HIST1H2AL    | 0.0001 |
| VIP          | 0.0001 |
| LOC100505826 | 0.0001 |
| AGTPBP1      | 0.0001 |
| NF2          | 0.0001 |
| TNS3         | 0.0001 |
| CDC6         | 0.0001 |
| AMN          | 0.0001 |

|              |        |
|--------------|--------|
| C8orf83      | 0.0001 |
| ZNF26        | 0.0001 |
| MTUS1        | 0.0001 |
| DHX37        | 0.0001 |
| CDKL4        | 0.0001 |
| B4GALNT1     | 0.0001 |
| POTEC        | 0.0001 |
| GPC1         | 0.0001 |
| MCTS1        | 0.0001 |
| SLCO1B7      | 0.0001 |
| ACTN2        | 0.0001 |
| GPR123       | 0.0001 |
| ITM2C        | 0.0001 |
| ATPAF1       | 0.0001 |
| HOTAIRM1     | 0.0001 |
| DHX40        | 0.0001 |
| MGC15885     | 0.0001 |
| LTV1         | 0.0001 |
| SSTR3        | 0.0001 |
| ADAM9        | 0.0001 |
| FAM116B      | 0.0001 |
| SMOC1        | 0.0001 |
| UPK3B        | 0.0001 |
| MRGPRF       | 0.0001 |
| AP2A1        | 0.0001 |
| PRCD         | 0.0001 |
| PHC2         | 0.0001 |
| LIMA1        | 0.0001 |
| FLJ90680     | 0.0001 |
| TP53BP1      | 0.0001 |
| VWA5B2       | 0.0001 |
| WDR76        | 0.0001 |
| ZNF568       | 0.0001 |
| CD58         | 0.0001 |
| SLCO2B1      | 0.0001 |
| RAD54L       | 0.0001 |
| TMC4         | 0.0001 |
| LOC100507131 | 0.0001 |
| MYADM        | 0.0001 |
| ARHGEF40     | 0.0001 |
| SPHK2        | 0.0001 |
| ASCL2        | 0.0001 |
| TMEM39A      | 0.0001 |
| ZBED1        | 0.0001 |
| C9orf156     | 0.0001 |
| ANAPC4       | 0.0001 |

|           |        |
|-----------|--------|
| ALG1      | 0.0001 |
| STARD9    | 0.0001 |
| FOXC2     | 0.0001 |
| DOK2      | 0.0001 |
| NAB1      | 0.0001 |
| ZNF788    | 0.0001 |
| LCN6      | 0.0001 |
| EGLN2     | 0.0001 |
| FAM18B2   | 0.0001 |
| GRAMD3    | 0.0001 |
| TIAM1     | 0.0001 |
| NUDT8     | 0.0001 |
| RRAGA     | 0.0001 |
| TMEM109   | 0.0001 |
| LINC00032 | 0.0001 |
| ZNF283    | 0.0001 |
| FXVD6     | 0.0001 |
| HNRNPAB   | 0.0001 |
| FUT4      | 0.0001 |
| C15orf50  | 0.0001 |
| PSMD4     | 0.0001 |
| TBKBP1    | 0.0001 |
| 1-Mar     | 0.0001 |
| KRT13     | 0.0001 |
| AGPAT4    | 0.0001 |
| TMEM144   | 0.0001 |
| HGFAC     | 0.0001 |
| DDX50     | 0.0001 |
| C11orf95  | 0.0001 |
| PAK1      | 0.0001 |
| SLC7A8    | 0.0001 |
| BACE2     | 0.0001 |
| IL1F10    | 0.0001 |
| FAM55B    | 0.0001 |
| RFX1      | 0.0001 |
| NUP205    | 0.0001 |
| KIAA0087  | 0.0001 |
| PPA1      | 0.0001 |
| FBXO22    | 0.0001 |
| PLA1A     | 0.0001 |
| C12orf12  | 0.0001 |
| UGT2B17   | 0.0001 |
| FCRLB     | 0.0001 |
| PKN3      | 0.0001 |
| DCTN1     | 0.0001 |
| MAMDC2    | 0.0001 |

|              |        |
|--------------|--------|
| ZNF304       | 0.0001 |
| TRIM3        | 0.0001 |
| GNB2L1       | 0.0001 |
| UBAC2-AS1    | 0.0001 |
| CXorf1       | 0.0001 |
| LGR5         | 0.0001 |
| FAM19A1      | 0.0001 |
| RXRG         | 0.0001 |
| LOC100505576 | 0.0001 |
| IKBKG        | 0.0001 |
| CRYAB        | 0.0001 |
| ZCCHC24      | 0.0001 |
| BCKDHB       | 0.0001 |
| MRPL15       | 0.0001 |
| KTN1         | 0.0001 |
| RIMS1        | 0.0001 |
| CAND1        | 0.0001 |
| CENPH        | 0.0001 |
| EPHX4        | 0.0001 |
| NPY6R        | 0.0001 |
| KRT8         | 0.0001 |
| TTC3         | 0.0001 |
| LINC00442    | 0.0001 |
| CDKL1        | 0.0001 |
| HMGN4        | 0.0001 |
| NXNL1        | 0.0001 |
| HOXD11       | 0.0001 |
| CDCA5        | 0.0001 |
| LINC00312    | 0.0001 |
| NDRG1        | 0.0001 |
| DCUN1D1      | 0.0001 |
| MMP17        | 0.0001 |
| EVI5L        | 0.0001 |
| UPRT         | 0.0001 |
| PRPF39       | 0.0001 |
| IFT74        | 0.0001 |
| CHRNA3       | 0.0001 |
| ADSL         | 0.0001 |
| RRN3P2       | 0.0001 |
| XPO5         | 0.0001 |
| MAMSTR       | 0.0001 |
| MIR22HG      | 0.0001 |
| LRRC61       | 0.0001 |
| SUV420H1     | 0.0001 |
| TMEM66       | 0.0001 |
| RBM33        | 0.0001 |

|              |        |
|--------------|--------|
| IER5L        | 0.0001 |
| NTHL1        | 0.0001 |
| LOC100287525 | 0.0001 |
| SLC25A32     | 0.0001 |
| GTPBP6       | 0.0001 |
| ZCCHC8       | 0.0001 |
| TFDP1        | 0.0001 |
| NUPL1        | 0.0001 |
| PRPH2        | 0.0001 |
| GKAP1        | 0.0001 |
| ANKRA2       | 0.0001 |
| HEATR8       | 0.0001 |
| LOC100131826 | 0.0001 |
| PIGP         | 0.0001 |
| LRRC28       | 0.0001 |
| HDAC5        | 0.0001 |
| PCSK5        | 0.0001 |
| GABARAP      | 0.0001 |
| RGL2         | 0.0001 |
| NCKAP1       | 0.0001 |
| ZBTB43       | 0.0001 |
| AFF2         | 0.0001 |
| RHBG         | 0.0001 |
| LOC100506462 | 0.0001 |
| KIAA1370     | 0.0001 |
| NFATC1       | 0.0001 |
| PLCL2        | 0.0001 |
| ZNF334       | 0.0001 |
| TNS1         | 0.0001 |
| ZNF526       | 0.0001 |
| THY1         | 0.0001 |
| OTUD5        | 0.0001 |
| DEDD2        | 0.0001 |
| ALG10B       | 0.0001 |
| RCAN3        | 0.0001 |
| DDX46        | 0.0001 |
| IGF1R        | 0.0001 |
| DDX43        | 0.0001 |
| HPCA         | 0.0001 |
| KLHDC7B      | 0.0001 |
| MOGS         | 0.0001 |
| IL32         | 0.0001 |
| KIF7         | 0.0001 |
| SHISA7       | 0.0001 |
| FN3K         | 0.0001 |
| TMEM154      | 0.0001 |

|           |        |
|-----------|--------|
| RFPL1-AS1 | 0.0001 |
| CELSR3    | 0.0001 |
| RHOC      | 0.0001 |
| FRMD4A    | 0.0001 |
| SLC28A3   | 0.0001 |
| CPS1      | 0.0001 |
| HRH3      | 0.0001 |
| VTI1B     | 0.0001 |
| TNIP2     | 0.0001 |
| RBM46     | 0.0001 |
| RGS18     | 0.0001 |
| SNCAIP    | 0.0001 |
| SLC7A7    | 0.0001 |
| SLC6A20   | 0.0001 |
| C12orf65  | 0.0001 |
| DCTD      | 0.0001 |
| ECM2      | 0.0001 |
| KCNK6     | 0.0001 |
| COL7A1    | 0.0001 |
| TMEM191B  | 0.0001 |
| STAT5A    | 0.0001 |
| CGB1      | 0.0001 |
| GPN2      | 0.0001 |
| KLHDC1    | 0.0001 |
| ASXL2     | 0.0001 |
| SIT1      | 0.0001 |
| TRAPPC5   | 0.0001 |
| C11orf46  | 0.0001 |
| NFYB      | 0.0001 |
| TMEM18    | 0.0001 |
| C14orf118 | 0.0001 |
| PPP1R1B   | 0.0001 |
| DARC      | 0.0001 |
| PCNT      | 0.0001 |
| TSHB      | 0.0001 |
| NOP10     | 0.0001 |
| ROS1      | 0.0001 |
| CHCHD6    | 0.0001 |
| ARL2      | 0.0001 |
| CNGA3     | 0.0001 |
| C10orf88  | 0.0001 |
| SRSF3     | 0.0001 |
| GRIPAP1   | 0.0001 |
| APOBEC3C  | 0.0001 |
| STK36     | 0.0001 |
| KPNA1     | 0.0001 |

|           |        |
|-----------|--------|
| DUSP16    | 0.0001 |
| TMEM67    | 0.0001 |
| EFCAB4A   | 0.0001 |
| SMR3A     | 0.0001 |
| KIAA0317  | 0.0001 |
| DIRC1     | 0.0001 |
| TFB1M     | 0.0001 |
| PLA2G16   | 0.0001 |
| FLJ40292  | 0.0001 |
| MFAP4     | 0.0001 |
| CD46      | 0.0001 |
| TM4SF5    | 0.0001 |
| TTYH3     | 0.0001 |
| TRIM28    | 0.0001 |
| BCAR3     | 0.0001 |
| SMAD3     | 0.0001 |
| EIF2C1    | 0.0001 |
| XAGE2B    | 0.0001 |
| TMEM61    | 0.0001 |
| SOX6      | 0.0001 |
| SHPRH     | 0.0001 |
| GALK2     | 0.0001 |
| VAPA      | 0.0001 |
| PRIC285   | 0.0001 |
| NBPF14    | 0.0001 |
| DYDC1     | 0.0001 |
| IQCG      | 0.0001 |
| IQCF6     | 0.0001 |
| SEMA4D    | 0.0001 |
| NARS2     | 0.0001 |
| TARS2     | 0.0001 |
| PITX3     | 0.0001 |
| PRB4      | 0.0001 |
| APOA4     | 0.0001 |
| TMEM180   | 0.0001 |
| ADAM23    | 0.0001 |
| GBAS      | 0.0001 |
| LRRC10B   | 0.0001 |
| HLA-DRA   | 0.0001 |
| DNAI1     | 0.0001 |
| WAS       | 0.0001 |
| LOC283861 | 0.0001 |
| ZIM3      | 0.0001 |
| PRDX4     | 0.0001 |
| RRP7B     | 0.0001 |
| ZNF45     | 0.0001 |



|           |        |
|-----------|--------|
| SUB1      | 0.0001 |
| ATP4A     | 0.0001 |
| IQCF2     | 0.0001 |
| SEC62     | 0.0001 |
| PDE7A     | 0.0001 |
| LOC374890 | 0.0001 |
| TNFRSF4   | 0.0001 |
| UBL3      | 0.0001 |
| C3orf30   | 0.0001 |
| NUP85     | 0.0001 |
| FBXL22    | 0.0001 |
| MPHOSPH9  | 0.0001 |
| RHOD      | 0.0001 |
| IL1RN     | 0.0001 |
| CLIC4     | 0.0001 |
| C15orf42  | 0.0001 |
| GABRE     | 0.0001 |
| LCE4A     | 0.0001 |
| CYTH1     | 0.0001 |
| ZNF57     | 0.0001 |
| DUSP8     | 0.0001 |
| SERPINB5  | 0.0001 |
| LOC375295 | 0.0001 |
| TRMT12    | 0.0001 |
| C14orf1   | 0.0001 |
| ZMYM3     | 0.0001 |
| CUZD1     | 0.0001 |
| CDH10     | 0.0001 |
| MORN1     | 0.0001 |
| MARK2     | 0.0001 |
| FAM71B    | 0.0001 |
| TAAR2     | 0.0001 |
| CD5       | 0.0001 |
| TRIOBP    | 0.0001 |
| OAS2      | 0.0001 |
| IRS2      | 0.0001 |
| UBXN4     | 0.0001 |
| C11orf61  | 0.0001 |
| RRAD      | 0.0001 |
| SIRT3     | 0.0001 |
| TM6SF1    | 0.0001 |
| SNX15     | 0.0001 |
| GRIK3     | 0.0001 |
| COL13A1   | 0.0001 |
| APOM      | 0.0001 |
| DUS1L     | 0.0001 |

|              |        |
|--------------|--------|
| KCNK17       | 0.0001 |
| BZW1         | 0.0001 |
| PLDN         | 0.0001 |
| SHMT2        | 0.0001 |
| C20orf26     | 0.0001 |
| IQCB1        | 0.0001 |
| POLE2        | 0.0001 |
| TMEM168      | 0.0001 |
| OST4         | 0.0001 |
| ZNF642       | 0.0001 |
| ANKRD58      | 0.0001 |
| LINC00475    | 0.0001 |
| NUTF2        | 0.0001 |
| SIN3B        | 0.0001 |
| CXCR7        | 0.0001 |
| PPFIBP2      | 0.0001 |
| RPS27L       | 0.0001 |
| C11orf30     | 0.0001 |
| CPSF3        | 0.0001 |
| IL21         | 0.0001 |
| GYPB         | 0.0001 |
| ZNF783       | 0.0001 |
| FAM208B      | 0.0001 |
| CDK4         | 0.0001 |
| WDR85        | 0.0001 |
| UBXN1        | 0.0001 |
| RPL36AP40    | 0.0001 |
| YARS2        | 0.0001 |
| MRPL22       | 0.0001 |
| NPAS2        | 0.0001 |
| ZNF225       | 0.0001 |
| ZDHHC15      | 0.0001 |
| CSF2         | 0.0001 |
| IFT122       | 0.0001 |
| C15orf5      | 0.0001 |
| LOC100507800 | 0.0001 |
| BBS7         | 0.0001 |
| PSD4         | 0.0001 |
| DZIP3        | 0.0001 |
| STX7         | 0.0001 |
| EXD1         | 0.0001 |
| SEMA4A       | 0.0001 |
| DEPDC1B      | 0.0001 |
| MANBA        | 0.0001 |
| NDUFV2       | 0.0001 |
| ANKRD18A     | 0.0001 |

|           |        |
|-----------|--------|
| KCTD7     | 0.0001 |
| FER1L5    | 0.0001 |
| SEC61A1   | 0.0001 |
| HIP1      | 0.0001 |
| YTHDC1    | 0.0001 |
| LRRC16B   | 0.0001 |
| CHRND     | 0.0001 |
| FBXL3     | 0.0001 |
| PKNX1     | 0.0001 |
| FLJ38576  | 0.0001 |
| CPEB4     | 0.0001 |
| SLC18A3   | 0.0001 |
| AXIN1     | 0.0001 |
| SRRM3     | 0.0001 |
| WFDC1     | 0.0001 |
| AMBRA1    | 0.0001 |
| ZCWPW1    | 0.0001 |
| STXBP6    | 0.0001 |
| WDFY3     | 0.0001 |
| POLR3F    | 0.0001 |
| WDR35     | 0.0001 |
| ANPEP     | 0.0001 |
| MGAT4A    | 0.0001 |
| C5orf45   | 0.0001 |
| SVOP      | 0.0001 |
| LCMT2     | 0.0001 |
| COX19     | 0.0001 |
| FUNDC1    | 0.0001 |
| CAMTA1    | 0.0001 |
| C18orf32  | 0.0001 |
| DNAH6     | 0.0001 |
| WFDC6     | 0.0001 |
| SLC25A25  | 0.0001 |
| RNF151    | 0.0001 |
| C12orf51  | 0.0001 |
| OR6N1     | 0.0001 |
| PYGO1     | 0.0001 |
| RPL3L     | 0.0001 |
| GOLT1B    | 0.0001 |
| PCDHB11   | 0.0001 |
| RGSL1     | 0.0001 |
| RPN1      | 0.0001 |
| LOC641518 | 0.0001 |
| LRRC48    | 0.0001 |
| ZNF275    | 0.0001 |
| PRO0471   | 0.0001 |

|              |        |
|--------------|--------|
| NME7         | 0.0001 |
| TRIP6        | 0.0001 |
| HRH2         | 0.0001 |
| SGSM2        | 0.0001 |
| AGBL3        | 0.0001 |
| SELS         | 0.0001 |
| CTAGE1       | 0.0001 |
| C16orf48     | 0.0001 |
| FAIM2        | 0.0001 |
| AUH          | 0.0001 |
| COG8         | 0.0001 |
| ATP2C2       | 0.0001 |
| LOC100287723 | 0.0001 |
| SLC2A8       | 0.0001 |
| INSIG2       | 0.0001 |
| C14orf132    | 0.0001 |
| ANO6         | 0.0001 |
| KIF27        | 0.0001 |
| USP6         | 0.0001 |
| MIR143HG     | 0.0001 |
| LOC100527964 | 0.0001 |
| GNAQ         | 0.0001 |
| IDH2         | 0.0001 |
| KIAA1731     | 0.0001 |
| SNAP23       | 0.0001 |
| IGSF10       | 0.0001 |
| WNK1         | 0.0001 |
| GPR125       | 0.0001 |
| GUCY2C       | 0.0001 |
| GTPBP3       | 0.0001 |
| C13orf16     | 0.0001 |
| F2RL2        | 0.0001 |
| ORMDL1       | 0.0001 |
| FGF17        | 0.0001 |
| COL11A2      | 0.0001 |
| POM121L1P    | 0.0001 |
| DHRS11       | 0.0001 |
| LOC100508226 | 0.0001 |
| KCNQ1OT1     | 0.0001 |
| NPM1         | 0.0001 |
| LOC100507642 | 0.0001 |
| FAM63A       | 0.0001 |
| ND4          | 0.0001 |
| ERN1         | 0.0001 |
| CD2BP2       | 0.0001 |
| NSUN5        | 0.0001 |

|              |        |
|--------------|--------|
| C12orf48     | 0.0001 |
| RALGAPA1     | 0.0001 |
| RELA         | 0.0001 |
| RARA         | 0.0001 |
| GALNT9       | 0.0001 |
| CYP2S1       | 0.0001 |
| KIAA1143     | 0.0001 |
| CABP1        | 0.0001 |
| ST6GAL1      | 0.0001 |
| SLC27A3      | 0.0001 |
| LMX1A        | 0.0001 |
| PCYT2        | 0.0001 |
| LOC100130950 | 0.0001 |
| PCDHAC1      | 0.0001 |
| C22orf15     | 0.0001 |
| C6orf58      | 0.0001 |
| MDFIC        | 0.0001 |
| GPR32        | 0.0001 |
| ALDH3B1      | 0.0001 |
| DKFZp547G183 | 0.0001 |
| CD82         | 0.0001 |
| NAT8L        | 0.0001 |
| ZNF300P1     | 0.0001 |
| JAGN1        | 0.0001 |
| KAZN         | 0.0001 |
| C12orf23     | 0.0001 |
| C15orf43     | 0.0001 |
| DCAF15       | 0.0001 |
| SGPP2        | 0.0001 |
| ADA          | 0.0001 |
| HIST1H4D     | 0.0001 |
| KCNS1        | 0.0001 |
| VAX2         | 0.0001 |
| SCRT2        | 0.0001 |
| RSPH1        | 0.0001 |
| SAA2         | 0.0001 |
| CUL1         | 0.0001 |
| PITX2        | 0.0001 |
| TAS2R38      | 0.0001 |
| GATA1        | 0.0001 |
| PRKRA        | 0.0001 |
| GBP6         | 0.0001 |
| FOXN2        | 0.0001 |
| GSK3A        | 0.0001 |
| PPM1A        | 0.0001 |
| TRAF7        | 0.0001 |

|              |        |
|--------------|--------|
| INSM2        | 0.0001 |
| DNAJB4       | 0.0001 |
| NPTN         | 0.0001 |
| EIF1AD       | 0.0001 |
| UBE2QL1      | 0.0001 |
| EBP          | 0.0001 |
| PURA         | 0.0001 |
| ALPPL2       | 0.0001 |
| JSRP1        | 0.0001 |
| RRH          | 0.0001 |
| MZT1         | 0.0001 |
| TRAF1        | 0.0001 |
| CHTF8        | 0.0001 |
| TLR8         | 0.0001 |
| USP6NL       | 0.0001 |
| C12orf70     | 0.0001 |
| WSCD1        | 0.0001 |
| IVL          | 0.0001 |
| CNTNAP4      | 0.0001 |
| NLRP11       | 0.0001 |
| PKIG         | 0.0001 |
| KLHL36       | 0.0001 |
| GGT3P        | 0.0001 |
| TMEM181      | 0.0001 |
| LOC100128108 | 0.0001 |
| DCD          | 0.0001 |
| SERBP1       | 0.0001 |
| DEFB123      | 0.0001 |
| MGC34796     | 0.0001 |
| LOC100287803 | 0.0001 |
| KRTAP13-2    | 0.0001 |
| EPYC         | 0.0001 |
| TTY3         | 0.0001 |
| AGTR1        | 0.0001 |
| SLITRK2      | 0.0001 |
| HMGB2        | 0.0001 |
| RNGTT        | 0.0001 |
| 4-Mar        | 0.0001 |
| SLC38A9      | 0.0001 |
| OR11H12      | 0.0001 |
| TMEM38B      | 0.0001 |
| LALBA        | 0.0001 |
| NBR1         | 0.0001 |
| YTHDC2       | 0.0001 |
| DNMT3L       | 0.0001 |
| TFF2         | 0.0001 |

|                |        |
|----------------|--------|
| LOC100507351   | 0.0001 |
| RBAK-LOC389458 | 0.0001 |
| CPB1           | 0.0001 |
| DSCR3          | 0.0001 |
| FEM1A          | 0.0001 |
| ALX3           | 0.0001 |
| LDOC1L         | 0.0001 |
| PPP1R11        | 0.0001 |
| LOC439938      | 0.0001 |
| SLC2A13        | 0.0001 |
| NOG            | 0.0001 |
| MGC15705       | 0.0001 |
| MRPL14         | 0.0001 |
| PLAC8          | 0.0001 |
| ZNF628         | 0.0001 |
| FAM92B         | 0.0001 |
| C6orf106       | 0.0001 |
| HOXB3          | 0.0001 |
| ASPG           | 0.0001 |
| RPLP0P2        | 0.0001 |
| RNASE11        | 0.0001 |
| OXNAD1         | 0.0001 |
| PELP1          | 0.0001 |
| LEPROT         | 0.0001 |
| MACROD1        | 0.0001 |
| ID1            | 0.0001 |
| CRABP1         | 0.0001 |
| EPB41          | 0.0001 |
| ZNF559         | 0.0001 |
| SLC25A5-AS1    | 0.0001 |
| ZBTB26         | 0.0001 |
| LOC100127972   | 0.0001 |
| LOC100129894   | 0.0001 |
| CRAT           | 0.0001 |
| PCDHB10        | 0.0001 |
| TMED10P1       | 0.0001 |
| FCER1A         | 0.0001 |
| HNF4G          | 0.0001 |
| LMO1           | 0.0001 |
| RNF113B        | 0.0001 |
| TLCD1          | 0.0001 |
| CD27           | 0.0001 |
| ARFGAP2        | 0.0001 |
| YIF1B          | 0.0001 |
| ERBB3          | 0.0001 |
| C10orf92       | 0.0001 |

|           |        |
|-----------|--------|
| VN1R1     | 0.0001 |
| SPINLW1   | 0.0001 |
| AIFM2     | 0.0001 |
| SHB       | 0.0001 |
| HOMER3    | 0.0001 |
| RAE1      | 0.0001 |
| ITLN1     | 0.0001 |
| MTG1      | 0.0001 |
| ACPT      | 0.0001 |
| LRRC37A3  | 0.0001 |
| STMN3     | 0.0001 |
| EHF       | 0.0001 |
| SELT      | 0.0001 |
| LY96      | 0.0001 |
| KRTAP3-1  | 0.0001 |
| YLPM1     | 0.0001 |
| BFSP1     | 0.0001 |
| SLC35F1   | 0.0001 |
| LOC286382 | 0.0001 |
| SESN2     | 0.0001 |
| HSPG2     | 0.0001 |
| SPG20OS   | 0.0001 |
| TOMM20    | 0.0001 |
| AKAP8L    | 0.0001 |
| PRRX2     | 0.0001 |
| GPRASP2   | 0.0001 |
| EFCAB7    | 0.0001 |
| ARHGEF3   | 0.0001 |
| KCNMB1    | 0.0001 |
| BMF       | 0.0001 |
| C9orf78   | 0.0001 |
| BEND6     | 0.0001 |
| HACL1     | 0.0001 |
| CHST6     | 0.0001 |
| LYZL2     | 0.0001 |
| YRDC      | 0.0001 |
| MAPK10    | 0.0001 |
| FCRL3     | 0.0001 |
| PDS5B     | 0.0001 |
| EMCN      | 0.0001 |
| BLK       | 0.0001 |
| C14orf135 | 0.0001 |
| FLJ35390  | 0.0001 |
| C14orf23  | 0.0001 |
| KDM2B     | 0.0001 |
| KHDRBS2   | 0.0001 |



|           |        |
|-----------|--------|
| RPS6KB2   | 0.0001 |
| MPG       | 0.0001 |
| UBR5      | 0.0001 |
| ZNF10     | 0.0001 |
| BPHL      | 0.0001 |
| OLAH      | 0.0001 |
| ERI3      | 0.0001 |
| KRTAP6-3  | 0.0001 |
| SLC35G1   | 0.0001 |
| SUOX      | 0.0001 |
| RMI1      | 0.0001 |
| IL1RAP    | 0.0001 |
| CCDC82    | 0.0001 |
| TAS1R1    | 0.0001 |
| RFX7      | 0.0001 |
| ICOS      | 0.0001 |
| ZNF781    | 0.0001 |
| GALNT13   | 0.0001 |
| XRN2      | 0.0001 |
| SLC24A3   | 0.0001 |
| CLSTN3    | 0.0001 |
| HSPBAP1   | 0.0001 |
| GFER      | 0.0001 |
| RECQL     | 0.0001 |
| FAM184A   | 0.0001 |
| SELL      | 0.0001 |
| GAFA2     | 0.0001 |
| SLC22A9   | 0.0001 |
| CR1L      | 0.0001 |
| CYB5B     | 0.0001 |
| HEXB      | 0.0001 |
| BAZ1A     | 0.0001 |
| CSN2      | 0.0001 |
| CCDC88C   | 0.0001 |
| PRG4      | 0.0001 |
| IPO7      | 0.0001 |
| C1orf21   | 0.0001 |
| KRTAP12-1 | 0.0001 |
| LETMD1    | 0.0001 |
| CCDC38    | 0.0001 |
| SMAGP     | 0.0001 |
| DLGAP1    | 0.0001 |
| ZFYVE27   | 0.0001 |
| C15orf33  | 0.0001 |
| CCDC85C   | 0.0001 |
| DNAJC18   | 0.0001 |

|              |        |
|--------------|--------|
| DEFT1P       | 0.0001 |
| ARNT         | 0.0001 |
| RPS6KA4      | 0.0001 |
| TTC21B       | 0.0001 |
| FER1L4       | 0.0001 |
| PTPN21       | 0.0001 |
| ASPHD1       | 0.0001 |
| MRPL18       | 0.0001 |
| NEU2         | 0.0001 |
| LY6E         | 0.0001 |
| ZNF530       | 0.0001 |
| DPPA3        | 0.0001 |
| LOC100652762 | 0.0001 |
| SRSF1        | 0.0001 |
| MSL3P1       | 0.0001 |
| CCBP2        | 0.0001 |
| CABLES2      | 0.0001 |
| UPF2         | 0.0001 |
| ATP1A2       | 0.0001 |
| DHX57        | 0.0001 |
| KRTAP3-3     | 0.0001 |
| CEP72        | 0.0001 |
| RAB2B        | 0.0001 |
| GTF3C5       | 0.0001 |
| LOC284801    | 0.0001 |
| CD320        | 0.0001 |
| RASL10B      | 0.0001 |
| JMJD1C       | 0.0001 |
| EEF1A1       | 0.0001 |
| MBD1         | 0.0001 |
| SERINC3      | 0.0001 |
| C17orf88     | 0.0001 |
| PRB3         | 0.0001 |
| ADCY4        | 0.0001 |
| PKI55        | 0.0001 |
| HSPA4        | 0.0001 |
| ATOH7        | 0.0001 |
| HMGN1        | 0.0001 |
| GIMAP4       | 0.0001 |
| PIK3C3       | 0.0001 |
| TBC1D9       | 0.0001 |
| THOC6        | 0.0001 |
| IL15RA       | 0.0001 |
| CHADL        | 0.0001 |
| CSE1L        | 0.0001 |
| HCFC1R1      | 0.0001 |

|              |        |
|--------------|--------|
| PITX1        | 0.0001 |
| RCVRN        | 0.0001 |
| CD69         | 0.0001 |
| IFNB1        | 0.0001 |
| C15orf55     | 0.0001 |
| ARHGAP33     | 0.0001 |
| TOP3A        | 0.0001 |
| HNRNPD       | 0.0001 |
| EPHB6        | 0.0001 |
| FFAR2        | 0.0001 |
| ARHGEF10L    | 0.0001 |
| CCDC89       | 0.0001 |
| TM9SF3       | 0.0001 |
| C3orf15      | 0.0001 |
| LOC404266    | 0.0001 |
| ABI3BP       | 0.0001 |
| TTC13        | 0.0001 |
| RCN3         | 0.0001 |
| PRUNE        | 0.0001 |
| LOC100509196 | 0.0001 |
| FLJ36848     | 0.0001 |
| PGBD3        | 0.0001 |
| CCDC80       | 0.0001 |
| GUSBP3       | 0.0001 |
| SFXN1        | 0.0001 |
| LOC100506798 | 0.0001 |
| ZNF589       | 0.0001 |
| GLRA3        | 0.0001 |
| PADI3        | 0.0001 |
| GSTA1        | 0.0001 |
| RDH13        | 0.0001 |
| TRAPPC6B     | 0.0001 |
| RNASE8       | 0.0001 |
| ZNF552       | 0.0001 |
| PLIN5        | 0.0001 |
| RBMXL1       | 0.0001 |
| GPX2         | 0.0001 |
| FUT10        | 0.0001 |
| GDF3         | 0.0001 |
| CTAGE11P     | 0.0001 |
| LOH12CR1     | 0.0001 |
| ICAM1        | 0.0001 |
| BTNL3        | 0.0001 |
| GNRH2        | 0.0001 |
| CCDC96       | 0.0001 |
| CAMK1D       | 0.0001 |

|          |        |
|----------|--------|
| C16orf88 | 0.0001 |
| C2orf43  | 0.0001 |
| KRTAP4-4 | 0.0001 |
| MCM6     | 0.0001 |
| BEND2    | 0.0001 |
| MGAT4B   | 0.0001 |
| CA11     | 0.0001 |
| CYC1     | 0.0001 |
| MAP3K11  | 0.0001 |
| LRRC18   | 0.0001 |
| ARMCX1   | 0.0001 |
| SNRNP27  | 0.0001 |
| TRPA1    | 0.0001 |
| HIPK2    | 0.0001 |
| UNC13B   | 0.0001 |
| CRYGS    | 0.0001 |
| PPP4R2   | 0.0001 |
| DBC1     | 0.0001 |
| MEGF9    | 0.0001 |
| FAM27E3  | 0.0001 |
| NUDT15   | 0.0001 |
| GNG13    | 0.0001 |
| FAM134B  | 0.0001 |
| PMFBP1   | 0.0001 |
| ABLIM2   | 0.0001 |
| DOCK2    | 0.0001 |
| RHPN2    | 0.0001 |
| CPAMD8   | 0.0001 |
| C7orf43  | 0.0001 |
| SRFBP1   | 0.0001 |
| MYCT1    | 0.0001 |
| TMEM86B  | 0.0001 |
| PITPNB   | 0.0001 |
| LTBP1    | 0.0001 |
| ODF2L    | 0.0001 |
| SCG5     | 0.0001 |
| TMEM41A  | 0.0001 |
| CDS2     | 0.0001 |
| DGCR6L   | 0.0001 |
| ZNF207   | 0.0001 |
| PHF5A    | 0.0001 |
| PNISR    | 0.0001 |
| MAVS     | 0.0001 |
| KCNS2    | 0.0001 |
| C5orf43  | 0.0001 |
| HCRT     | 0.0001 |

|           |        |
|-----------|--------|
| WASF3     | 0.0001 |
| MMRN2     | 0.0001 |
| TSPAN2    | 0.0001 |
| NUDT22    | 0.0001 |
| JUP       | 0.0001 |
| GABPA     | 0.0001 |
| MTCH2     | 0.0001 |
| PDGFD     | 0.0001 |
| TMEM120A  | 0.0001 |
| CCDC88B   | 0.0001 |
| OR5H1     | 0.0001 |
| HM13      | 0.0001 |
| IL20RA    | 0.0001 |
| ICAM2     | 0.0001 |
| NMNAT3    | 0.0001 |
| GOLGA7    | 0.0001 |
| CDV3      | 0.0001 |
| LEMD1     | 0.0001 |
| LOC401357 | 0.0001 |
| ZNF488    | 0.0001 |
| CALML4    | 0.0001 |
| GRPEL2    | 0.0001 |
| ALDOAP2   | 0.0001 |
| MIPEP     | 0.0001 |
| AQP6      | 0.0001 |
| ATF6B     | 0.0001 |
| ST3GAL6   | 0.0001 |
| ZFAND6    | 0.0001 |
| LRIT1     | 0.0001 |
| KLHL1     | 0.0001 |
| SLC35A3   | 0.0001 |
| CD79A     | 0.0001 |
| LRRC36    | 0.0001 |
| SSTR4     | 0.0001 |
| PCBD1     | 0.0001 |
| NUP93     | 0.0001 |
| LHB       | 0.0001 |
| PMS1      | 0.0001 |
| BDH1      | 0.0001 |
| CGB2      | 0.0001 |
| AP1S3     | 0.0001 |
| METTL13   | 0.0001 |
| HAPLN1    | 0.0001 |
| XRCC3     | 0.0001 |
| CBL       | 0.0001 |
| CD74      | 0.0001 |

|              |        |
|--------------|--------|
| DPY19L4      | 0.0001 |
| EZH1         | 0.0001 |
| METTL6       | 0.0001 |
| LAMB1        | 0.0001 |
| CYP4X1       | 0.0001 |
| RAB4A        | 0.0001 |
| TUBGCP5      | 0.0001 |
| LOC554207    | 0.0001 |
| LOC653075    | 0.0001 |
| CRIP1        | 0.0001 |
| DKFZP547L112 | 0.0001 |
| SLC2A9       | 0.0001 |
| RUNDC1       | 0.0001 |
| ZCCHC12      | 0.0001 |
| HOPX         | 0.0001 |
| GGCT         | 0.0001 |
| CAPN3        | 0.0001 |
| MPEG1        | 0.0001 |
| NOC2L        | 0.0001 |
| C15orf62     | 0.0001 |
| TRABD        | 0.0001 |
| C1orf56      | 0.0001 |
| LOC100129115 | 0.0001 |
| SEC24C       | 0.0001 |
| RNF40        | 0.0001 |
| 2-Sep        | 0.0001 |
| RDH16        | 0.0001 |
| PLEKHG2      | 0.0001 |
| CCDC34       | 0.0001 |
| KRAS         | 0.0001 |
| LOC400794    | 0.0001 |
| LCP2         | 0.0001 |
| SLFN5        | 0.0001 |
| OR6M1        | 0.0001 |
| TIA1         | 0.0001 |
| TADA2B       | 0.0001 |
| SHD          | 0.0001 |
| TBC1D21      | 0.0001 |
| MOB3B        | 0.0001 |
| SHISA9       | 0.0001 |
| NUFIP1       | 0.0001 |
| VPS35        | 0.0001 |
| C20orf111    | 0.0001 |
| C3orf51      | 0.0001 |
| RPS19        | 0.0001 |
| STRN3        | 0.0001 |

|              |        |
|--------------|--------|
| RNF212       | 0.0001 |
| MOB3A        | 0.0001 |
| FAM46C       | 0.0001 |
| ATAD3B       | 0.0001 |
| ZNF267       | 0.0001 |
| STT3B        | 0.0001 |
| WDHD1        | 0.0001 |
| RANBP6       | 0.0001 |
| FBXO27       | 0.0001 |
| EPB49        | 0.0001 |
| NAA50        | 0.0001 |
| NFKB1        | 0.0001 |
| ACOT1        | 0.0001 |
| NDUFA8       | 0.0001 |
| ZNF737       | 0.0001 |
| RXFP3        | 0.0001 |
| TTC9         | 0.0001 |
| C9orf82      | 0.0001 |
| USP17        | 0.0001 |
| RBPL         | 0.0001 |
| SLC36A3      | 0.0001 |
| CCL21        | 0.0001 |
| FAM46B       | 0.0001 |
| CCL7         | 0.0000 |
| SRPX2        | 0.0000 |
| DYDC2        | 0.0000 |
| CEL          | 0.0000 |
| HAMP         | 0.0000 |
| RASL11B      | 0.0000 |
| CSN3         | 0.0000 |
| GSTA5        | 0.0000 |
| MRPL3        | 0.0000 |
| LOC100506655 | 0.0000 |
| SLC26A1      | 0.0000 |
| CYB5RL       | 0.0000 |
| SNRPN        | 0.0000 |
| VILL         | 0.0000 |
| ACAD9        | 0.0000 |
| CACNA2D3     | 0.0000 |
| TFRC         | 0.0000 |
| ZNF672       | 0.0000 |
| CHST14       | 0.0000 |
| WDR89        | 0.0000 |
| ESYT1        | 0.0000 |
| AGPAT2       | 0.0000 |
| EDA          | 0.0000 |

|              |        |
|--------------|--------|
| VPS8         | 0.0000 |
| USPL1        | 0.0000 |
| RPRD1B       | 0.0000 |
| HFM1         | 0.0000 |
| MEAF6        | 0.0000 |
| LOC100506233 | 0.0000 |
| LOC440132    | 0.0000 |
| SERPINA13    | 0.0000 |
| C1orf55      | 0.0000 |
| DLEC1        | 0.0000 |
| ARHGEF6      | 0.0000 |
| NT5C1B       | 0.0000 |
| PGAM1        | 0.0000 |
| TMEM97       | 0.0000 |
| GIT1         | 0.0000 |
| HIST1H2AH    | 0.0000 |
| B3GAT1       | 0.0000 |
| PAGE2B       | 0.0000 |
| APOH         | 0.0000 |
| ZNF708       | 0.0000 |
| ADH5         | 0.0000 |
| SLC4A2       | 0.0000 |
| RRP8         | 0.0000 |
| ASB1         | 0.0000 |
| ATF1         | 0.0000 |
| FAM153B      | 0.0000 |
| LAG3         | 0.0000 |
| ARG1         | 0.0000 |
| ST8SIA3      | 0.0000 |
| TUBG1        | 0.0000 |
| BMPER        | 0.0000 |
| LRRC43       | 0.0000 |
| ACY3         | 0.0000 |
| FGD6         | 0.0000 |
| SLC35F5      | 0.0000 |
| GRAMD1C      | 0.0000 |
| PHF11        | 0.0000 |
| SPATA16      | 0.0000 |
| HES2         | 0.0000 |
| MGC16703     | 0.0000 |
| LRCH2        | 0.0000 |
| ADO          | 0.0000 |
| FXVD1        | 0.0000 |
| LOC389765    | 0.0000 |
| RAB21        | 0.0000 |
| LONRF1       | 0.0000 |



|           |        |
|-----------|--------|
| RBM15B    | 0.0000 |
| C6orf112  | 0.0000 |
| POLR1C    | 0.0000 |
| TTC17     | 0.0000 |
| HCRTR2    | 0.0000 |
| RALY      | 0.0000 |
| RBAK      | 0.0000 |
| SLTM      | 0.0000 |
| IMPDH1    | 0.0000 |
| CPA5      | 0.0000 |
| SPDEF     | 0.0000 |
| ZNF137P   | 0.0000 |
| GALR1     | 0.0000 |
| KLK5      | 0.0000 |
| TMEM108   | 0.0000 |
| NUP188    | 0.0000 |
| KCNN3     | 0.0000 |
| LOC728175 | 0.0000 |
| MEX3C     | 0.0000 |
| PLA2G6    | 0.0000 |
| LPCAT3    | 0.0000 |
| GRIA3     | 0.0000 |
| COPS8     | 0.0000 |
| TAS2R9    | 0.0000 |
| KIAA1826  | 0.0000 |
| NME2      | 0.0000 |
| NPAS4     | 0.0000 |
| TTC25     | 0.0000 |
| FAM122A   | 0.0000 |
| CHTOP     | 0.0000 |
| C1orf27   | 0.0000 |
| LOC400236 | 0.0000 |
| INSL6     | 0.0000 |
| RAB40C    | 0.0000 |
| CERS2     | 0.0000 |
| MAP7      | 0.0000 |
| PPP1R32   | 0.0000 |
| TMEM156   | 0.0000 |
| CEP120    | 0.0000 |
| PIK3R1    | 0.0000 |
| HECTD1    | 0.0000 |
| RAB3GAP2  | 0.0000 |
| SAFB      | 0.0000 |
| SRMS      | 0.0000 |
| C17orf105 | 0.0000 |
| CACNG4    | 0.0000 |

|              |        |
|--------------|--------|
| AK5          | 0.0000 |
| DLG1         | 0.0000 |
| NOC3L        | 0.0000 |
| SDHC         | 0.0000 |
| C4orf27      | 0.0000 |
| SLC25A46     | 0.0000 |
| C7orf11      | 0.0000 |
| SNAP47       | 0.0000 |
| GPR45        | 0.0000 |
| RAB27B       | 0.0000 |
| BNIP3L       | 0.0000 |
| LHX9         | 0.0000 |
| LAMA2        | 0.0000 |
| NSUN2        | 0.0000 |
| ABCC4        | 0.0000 |
| KIF9         | 0.0000 |
| MGC45922     | 0.0000 |
| C7orf10      | 0.0000 |
| TMEM17       | 0.0000 |
| HTR2A        | 0.0000 |
| ZFAND1       | 0.0000 |
| LY6G5C       | 0.0000 |
| C9orf41      | 0.0000 |
| PRDM14       | 0.0000 |
| LOC100506451 | 0.0000 |
| ATP5A1       | 0.0000 |
| EPC1         | 0.0000 |
| NCKAP5L      | 0.0000 |
| POLL         | 0.0000 |
| CABS1        | 0.0000 |
| GOLGA1       | 0.0000 |
| SRG7         | 0.0000 |
| RABL5        | 0.0000 |
| FZD4         | 0.0000 |
| TAF1A        | 0.0000 |
| BTG4         | 0.0000 |
| ENDOD1       | 0.0000 |
| PCDH1        | 0.0000 |
| NDUFAF4      | 0.0000 |
| SMOC2        | 0.0000 |
| FIBIN        | 0.0000 |
| ATG16L1      | 0.0000 |
| C17orf64     | 0.0000 |
| ATN1         | 0.0000 |
| DEK          | 0.0000 |
| P2RY8        | 0.0000 |

|           |        |
|-----------|--------|
| PGM1      | 0.0000 |
| ESRP2     | 0.0000 |
| TLL10     | 0.0000 |
| PCTP      | 0.0000 |
| ZBTB37    | 0.0000 |
| SLCO2A1   | 0.0000 |
| BRF2      | 0.0000 |
| RECK      | 0.0000 |
| SENP8     | 0.0000 |
| PEL13     | 0.0000 |
| ANKDD1A   | 0.0000 |
| CA13      | 0.0000 |
| MTMR12    | 0.0000 |
| ZFYVE26   | 0.0000 |
| PYCRL     | 0.0000 |
| CRNN      | 0.0000 |
| NIPAL2    | 0.0000 |
| PHF13     | 0.0000 |
| FIGF      | 0.0000 |
| LOC728323 | 0.0000 |
| UBE3B     | 0.0000 |
| FLAD1     | 0.0000 |
| EVC2      | 0.0000 |
| ZNF287    | 0.0000 |
| RTN4RL2   | 0.0000 |
| SGTA      | 0.0000 |
| TPRN      | 0.0000 |
| WDR24     | 0.0000 |
| UBE2H     | 0.0000 |
| HS3ST2    | 0.0000 |
| FSCB      | 0.0000 |
| MAPRE1    | 0.0000 |
| INTS10    | 0.0000 |
| TCF12     | 0.0000 |
| FAM73B    | 0.0000 |
| TMCO4     | 0.0000 |
| PDE3A     | 0.0000 |
| ANKS1B    | 0.0000 |
| ARRDC1    | 0.0000 |
| POGK      | 0.0000 |
| COLEC12   | 0.0000 |
| CCDC43    | 0.0000 |
| NCOA6     | 0.0000 |
| MRPS34    | 0.0000 |
| FNBP1     | 0.0000 |
| ZNF142    | 0.0000 |

|           |        |
|-----------|--------|
| TBX22     | 0.0000 |
| HHIP      | 0.0000 |
| TRPM2     | 0.0000 |
| SLC17A1   | 0.0000 |
| GHSR      | 0.0000 |
| ARL3      | 0.0000 |
| KRTAP9-4  | 0.0000 |
| FAM71F2   | 0.0000 |
| CCAR1     | 0.0000 |
| HIST1H2AK | 0.0000 |
| SCARF2    | 0.0000 |
| SEMG1     | 0.0000 |
| PRRG3     | 0.0000 |
| EIF2S1    | 0.0000 |
| C4orf38   | 0.0000 |
| TASP1     | 0.0000 |
| CYP2A13   | 0.0000 |
| TM7SF2    | 0.0000 |
| ZNF675    | 0.0000 |
| APOA2     | 0.0000 |
| TYK2      | 0.0000 |
| PSG4      | 0.0000 |
| GPX4      | 0.0000 |
| QRSL1     | 0.0000 |
| CDC40     | 0.0000 |
| IFI27L1   | 0.0000 |
| TCEAL7    | 0.0000 |
| DENND1B   | 0.0000 |
| TLR8-AS1  | 0.0000 |
| PHKG2     | 0.0000 |
| RIPPLY2   | 0.0000 |
| FAM82A1   | 0.0000 |
| RAP1GDS1  | 0.0000 |
| PCDH15    | 0.0000 |
| CD177     | 0.0000 |
| HSPA12B   | 0.0000 |
| DPH2      | 0.0000 |
| SULT1A2   | 0.0000 |
| POLK      | 0.0000 |
| ANO5      | 0.0000 |
| PRKAA1    | 0.0000 |
| DUSP3     | 0.0000 |
| ACSL4     | 0.0000 |
| TCAM1P    | 0.0000 |
| PLCD4     | 0.0000 |
| LOC729866 | 0.0000 |

|              |        |
|--------------|--------|
| DNMT1        | 0.0000 |
| TOX3         | 0.0000 |
| GPR84        | 0.0000 |
| ZNF182       | 0.0000 |
| ZNF639       | 0.0000 |
| RFNG         | 0.0000 |
| LOC100134713 | 0.0000 |
| DKFZP434F142 | 0.0000 |
| KIAA1967     | 0.0000 |
| MMS19        | 0.0000 |
| ZNF37BP      | 0.0000 |
| ZBTB11       | 0.0000 |
| PRORS1P      | 0.0000 |
| STC1         | 0.0000 |
| ATP7B        | 0.0000 |
| RABL3        | 0.0000 |
| SMC3         | 0.0000 |
| PYGO2        | 0.0000 |
| SLC7A11      | 0.0000 |
| SYT6         | 0.0000 |
| PABPC4       | 0.0000 |
| NPIPL2       | 0.0000 |
| POLR3D       | 0.0000 |
| TAF1         | 0.0000 |
| TRIM31       | 0.0000 |
| RGMB         | 0.0000 |
| LETM2        | 0.0000 |
| GCNT4        | 0.0000 |
| IMP4         | 0.0000 |
| ALG13        | 0.0000 |
| MORF4L1      | 0.0000 |
| ZNF750       | 0.0000 |
| CCR5         | 0.0000 |
| KRT14        | 0.0000 |
| ZNF555       | 0.0000 |
| AQPEP        | 0.0000 |
| ASAP1-IT1    | 0.0000 |
| DEFB104B     | 0.0000 |
| RNF216       | 0.0000 |
| FAF2         | 0.0000 |
| SCGB3A2      | 0.0000 |
| LOC400043    | 0.0000 |
| QTRT1        | 0.0000 |
| SCGB1D2      | 0.0000 |
| TRIM21       | 0.0000 |
| DSCR8        | 0.0000 |

|            |        |
|------------|--------|
| PKLR       | 0.0000 |
| LPIN2      | 0.0000 |
| ILVBL      | 0.0000 |
| ALPP       | 0.0000 |
| SNRPF      | 0.0000 |
| RNF32      | 0.0000 |
| INSR       | 0.0000 |
| BCAT1      | 0.0000 |
| TAOK3      | 0.0000 |
| 5-Sep      | 0.0000 |
| ITGA6      | 0.0000 |
| AKAP1      | 0.0000 |
| PLCD1      | 0.0000 |
| C10orf111  | 0.0000 |
| EMX2OS     | 0.0000 |
| NAMPT      | 0.0000 |
| H6PD       | 0.0000 |
| RPIA       | 0.0000 |
| BMP15      | 0.0000 |
| PSMB2      | 0.0000 |
| BNC1       | 0.0000 |
| TTC19      | 0.0000 |
| NDST3      | 0.0000 |
| KLHL8      | 0.0000 |
| CELF2      | 0.0000 |
| IGF1       | 0.0000 |
| CDKN2AIPNL | 0.0000 |
| MFHAS1     | 0.0000 |
| TEX261     | 0.0000 |
| CCPG1      | 0.0000 |
| TMEM200C   | 0.0000 |
| WDR45      | 0.0000 |
| RAP2B      | 0.0000 |
| HMGCS2     | 0.0000 |
| PELI1      | 0.0000 |
| PDLIM7     | 0.0000 |
| KCNA7      | 0.0000 |
| BACE1      | 0.0000 |
| SPTB       | 0.0000 |
| VPS45      | 0.0000 |
| SPHKAP     | 0.0000 |
| PPP1R12C   | 0.0000 |
| ZNF263     | 0.0000 |
| NDRG4      | 0.0000 |
| TBX2       | 0.0000 |
| FRA10AC1   | 0.0000 |

|          |        |
|----------|--------|
| NRIP3    | 0.0000 |
| FBXL16   | 0.0000 |
| CD81     | 0.0000 |
| PHF23    | 0.0000 |
| MYPN     | 0.0000 |
| SLC12A7  | 0.0000 |
| TSPAN10  | 0.0000 |
| ABI1     | 0.0000 |
| KIF25    | 0.0000 |
| JMJD7    | 0.0000 |
| PLD1     | 0.0000 |
| ACCN5    | 0.0000 |
| FBR5     | 0.0000 |
| CSRP2BP  | 0.0000 |
| LCE3E    | 0.0000 |
| C1orf81  | 0.0000 |
| LINS     | 0.0000 |
| PEMT     | 0.0000 |
| CHAD     | 0.0000 |
| ZNF821   | 0.0000 |
| TSPAN3   | 0.0000 |
| NOL4     | 0.0000 |
| INTS3    | 0.0000 |
| HIST1H1A | 0.0000 |
| ATP6V0A1 | 0.0000 |
| PRPS2    | 0.0000 |
| OR4K1    | 0.0000 |
| UBXN11   | 0.0000 |
| GOSR2    | 0.0000 |
| RAPGEF5  | 0.0000 |
| CD99     | 0.0000 |
| SPIN4    | 0.0000 |
| ABHD13   | 0.0000 |
| PP14571  | 0.0000 |
| TMOD3    | 0.0000 |
| KLF3     | 0.0000 |
| DNAJB12  | 0.0000 |
| C9orf123 | 0.0000 |
| ULK3     | 0.0000 |
| SLC25A12 | 0.0000 |
| PP2672   | 0.0000 |
| ARL4D    | 0.0000 |
| BUTR1    | 0.0000 |
| PASK     | 0.0000 |
| HNRNPR   | 0.0000 |
| TMEM204  | 0.0000 |

|          |        |
|----------|--------|
| CDC42EP2 | 0.0000 |
| DDX11    | 0.0000 |
| BICD2    | 0.0000 |
| KCNS3    | 0.0000 |
| BSG      | 0.0000 |
| MSTO1    | 0.0000 |
| BTBD2    | 0.0000 |
| SERTM1   | 0.0000 |
| PRM1     | 0.0000 |
| G2E3     | 0.0000 |
| BBS10    | 0.0000 |
| BRSK2    | 0.0000 |
| KLF12    | 0.0000 |
| CC2D2B   | 0.0000 |
| GRM8     | 0.0000 |
| PPP1R8   | 0.0000 |
| RPN2     | 0.0000 |
| FLCN     | 0.0000 |
| RAC2     | 0.0000 |
| WSB2     | 0.0000 |
| SLC6A18  | 0.0000 |
| BCAR4    | 0.0000 |
| FBN3     | 0.0000 |
| LLGL1    | 0.0000 |
| TARS     | 0.0000 |
| CD97     | 0.0000 |
| HMGB1    | 0.0000 |
| RPRD1A   | 0.0000 |
| CAGE1    | 0.0000 |
| CCRL1    | 0.0000 |
| CIZ1     | 0.0000 |
| SP5      | 0.0000 |
| IKBIP    | 0.0000 |
| CA1      | 0.0000 |
| FIGNL1   | 0.0000 |
| LCE1A    | 0.0000 |
| BCORL1   | 0.0000 |
| FAM18B1  | 0.0000 |
| SCML1    | 0.0000 |
| INTS7    | 0.0000 |
| SCN3B    | 0.0000 |
| KIAA1267 | 0.0000 |
| REXO4    | 0.0000 |
| CEACAM5  | 0.0000 |
| USP19    | 0.0000 |
| MRPL42   | 0.0000 |



|           |        |
|-----------|--------|
| C9orf142  | 0.0000 |
| C5orf54   | 0.0000 |
| GHDC      | 0.0000 |
| KAAG1     | 0.0000 |
| PRSS8     | 0.0000 |
| ARF4      | 0.0000 |
| VGLL3     | 0.0000 |
| BCO2      | 0.0000 |
| AHCY      | 0.0000 |
| NFE4      | 0.0000 |
| PLAC1L    | 0.0000 |
| CECR5-AS1 | 0.0000 |
| TRIM32    | 0.0000 |
| ENPP2     | 0.0000 |
| ZNF232    | 0.0000 |
| CAMK2D    | 0.0000 |
| UBE2L6    | 0.0000 |
| HTR1B     | 0.0000 |
| PNO1      | 0.0000 |
| CAMSAP2   | 0.0000 |
| C10orf12  | 0.0000 |
| NIPSNAP1  | 0.0000 |
| RETN      | 0.0000 |
| MAGEA10   | 0.0000 |
| DKC1      | 0.0000 |
| HLA-DOA   | 0.0000 |
| ARAP3     | 0.0000 |
| FOXA2     | 0.0000 |
| ZNF710    | 0.0000 |
| DHX30     | 0.0000 |
| ANO3      | 0.0000 |
| SYBU      | 0.0000 |
| ALG8      | 0.0000 |
| SNURF     | 0.0000 |
| PTPRJ     | 0.0000 |
| TAX1BP1   | 0.0000 |
| TUBA3D    | 0.0000 |
| FAM83F    | 0.0000 |
| TIMM9     | 0.0000 |
| CRIP2     | 0.0000 |
| IL28B     | 0.0000 |
| PIN1      | 0.0000 |
| ARHGEF11  | 0.0000 |
| CDC37     | 0.0000 |
| FAM108A1  | 0.0000 |
| RASA3     | 0.0000 |

|              |        |
|--------------|--------|
| CELF3        | 0.0000 |
| NUP153       | 0.0000 |
| C10orf27     | 0.0000 |
| XPC          | 0.0000 |
| MOB4         | 0.0000 |
| DOCK11       | 0.0000 |
| MIS18BP1     | 0.0000 |
| MAP6         | 0.0000 |
| AP4B1        | 0.0000 |
| PRKAR1A      | 0.0000 |
| VWC2L        | 0.0000 |
| TEDDM1       | 0.0000 |
| STK17A       | 0.0000 |
| 11-Sep       | 0.0000 |
| PTPN13       | 0.0000 |
| ECI1         | 0.0000 |
| C19orf55     | 0.0000 |
| PKD1L2       | 0.0000 |
| DUOXA2       | 0.0000 |
| GPX7         | 0.0000 |
| FAM131B      | 0.0000 |
| LPCAT1       | 0.0000 |
| PTPLAD2      | 0.0000 |
| GNAZ         | 0.0000 |
| MRPL12       | 0.0000 |
| CCDC158      | 0.0000 |
| POC5         | 0.0000 |
| PRR21        | 0.0000 |
| LSG1         | 0.0000 |
| VPS41        | 0.0000 |
| PIK3CB       | 0.0000 |
| RARRES2      | 0.0000 |
| DAB1         | 0.0000 |
| MGC34034     | 0.0000 |
| DUSP19       | 0.0000 |
| IFLTD1       | 0.0000 |
| CEBPZ        | 0.0000 |
| SLC9A8       | 0.0000 |
| STS          | 0.0000 |
| LOC100505695 | 0.0000 |
| TTPAL        | 0.0000 |
| GRM4         | 0.0000 |
| KCNJ14       | 0.0000 |
| GPD2         | 0.0000 |
| PERP         | 0.0000 |
| CELSR2       | 0.0000 |

|           |        |
|-----------|--------|
| TRAP1     | 0.0000 |
| PTER      | 0.0000 |
| CDKL5     | 0.0000 |
| EML3      | 0.0000 |
| KRT28     | 0.0000 |
| HEG1      | 0.0000 |
| SERPINB12 | 0.0000 |
| RSBN1     | 0.0000 |
| CCKAR     | 0.0000 |
| DTX2      | 0.0000 |
| TMX2      | 0.0000 |
| IL1RAPL1  | 0.0000 |
| ZFHX2     | 0.0000 |
| LRRC4C    | 0.0000 |
| TSTD2     | 0.0000 |
| HGC6.3    | 0.0000 |
| RNF187    | 0.0000 |
| ADM2      | 0.0000 |
| PPP1R9B   | 0.0000 |
| RMI2      | 0.0000 |
| TCP11     | 0.0000 |
| H1FX      | 0.0000 |
| ANP32A    | 0.0000 |
| TTC31     | 0.0000 |
| SLC7A6OS  | 0.0000 |
| EXTL1     | 0.0000 |
| AMZ2P1    | 0.0000 |
| HNRNPKP3  | 0.0000 |
| TRMT2B    | 0.0000 |
| KCNC1     | 0.0000 |
| HIST1H3D  | 0.0000 |
| GABRA3    | 0.0000 |
| IZUMO1    | 0.0000 |
| FBXL19    | 0.0000 |
| CDK2AP2   | 0.0000 |
| FERMT3    | 0.0000 |
| OSR1      | 0.0000 |
| GNG8      | 0.0000 |
| SLC38A5   | 0.0000 |
| CEBPB     | 0.0000 |
| SNHG10    | 0.0000 |
| RTN1      | 0.0000 |
| FBXO41    | 0.0000 |
| PGK1      | 0.0000 |
| IFNG      | 0.0000 |
| DNAJC30   | 0.0000 |

|           |        |
|-----------|--------|
| LOC285456 | 0.0000 |
| GORASP1   | 0.0000 |
| TUBG2     | 0.0000 |
| UBE2I     | 0.0000 |
| C14orf101 | 0.0000 |
| NISCH     | 0.0000 |
| TRAT1     | 0.0000 |
| MMGT1     | 0.0000 |
| ZRANB2    | 0.0000 |
| EPHB4     | 0.0000 |
| GPR119    | 0.0000 |
| HS6ST1    | 0.0000 |
| C11orf20  | 0.0000 |
| KCNJ6     | 0.0000 |
| HIF3A     | 0.0000 |
| SLC23A3   | 0.0000 |
| LOC285943 | 0.0000 |
| TH1L      | 0.0000 |
| KRT18     | 0.0000 |
| UBE2J2    | 0.0000 |
| BCL7C     | 0.0000 |
| TCP1      | 0.0000 |
| CAPN12    | 0.0000 |
| APOD      | 0.0000 |
| PPP1R37   | 0.0000 |
| HDGFRP2   | 0.0000 |
| CLCF1     | 0.0000 |
| SH3GLB1   | 0.0000 |
| FLJ43390  | 0.0000 |
| MAPK13    | 0.0000 |
| FRMD1     | 0.0000 |
| PTPRF     | 0.0000 |
| TMEM111   | 0.0000 |
| OTUD7B    | 0.0000 |
| OR4D2     | 0.0000 |
| FABP2     | 0.0000 |
| ZBTB48    | 0.0000 |
| UST       | 0.0000 |
| TMEM26    | 0.0000 |
| C1orf9    | 0.0000 |
| RNF103    | 0.0000 |
| PTGER2    | 0.0000 |
| CACNA1A   | 0.0000 |
| SCAMP2    | 0.0000 |
| PHLPP2    | 0.0000 |
| FAM195A   | 0.0000 |

|              |        |
|--------------|--------|
| MGC21881     | 0.0000 |
| PNOC         | 0.0000 |
| MRPS18A      | 0.0000 |
| SLC7A3       | 0.0000 |
| CLDN11       | 0.0000 |
| ERLIN2       | 0.0000 |
| COL27A1      | 0.0000 |
| KDM5A        | 0.0000 |
| SIK1         | 0.0000 |
| ADSS         | 0.0000 |
| DOK4         | 0.0000 |
| PAK4         | 0.0000 |
| PSD          | 0.0000 |
| MAP2K1       | 0.0000 |
| ITGA5        | 0.0000 |
| LOC100128262 | 0.0000 |
| POLR2F       | 0.0000 |
| SRXN1        | 0.0000 |
| RSRC2        | 0.0000 |
| CRYBA1       | 0.0000 |
| HSPA4L       | 0.0000 |
| IFNK         | 0.0000 |
| LOC100652987 | 0.0000 |
| ARPP21       | 0.0000 |
| PANX3        | 0.0000 |
| DCAF12L1     | 0.0000 |
| LAMB2        | 0.0000 |
| GABRB1       | 0.0000 |
| MESDC1       | 0.0000 |
| B3GAT3       | 0.0000 |
| C16orf3      | 0.0000 |
| TAS2R46      | 0.0000 |
| ZNF775       | 0.0000 |
| CDK3         | 0.0000 |
| HUWE1        | 0.0000 |
| LRRC57       | 0.0000 |
| PPP4R1       | 0.0000 |
| MTMR6        | 0.0000 |
| MEIS1        | 0.0000 |
| RHOG         | 0.0000 |
| CHN2         | 0.0000 |
| C21orf33     | 0.0000 |
| GNAI3        | 0.0000 |
| CACNA2D1     | 0.0000 |
| LRRC33       | 0.0000 |
| INF2         | 0.0000 |

|              |        |
|--------------|--------|
| SCARNA17     | 0.0000 |
| KAT5         | 0.0000 |
| PP7080       | 0.0000 |
| LOC255411    | 0.0000 |
| C1orf101     | 0.0000 |
| UNC79        | 0.0000 |
| IARS2        | 0.0000 |
| CPNE2        | 0.0000 |
| FAM71A       | 0.0000 |
| SYNPO        | 0.0000 |
| SEPHS1       | 0.0000 |
| LRFN5        | 0.0000 |
| LOC100506874 | 0.0000 |
| DDX31        | 0.0000 |
| STXBP3       | 0.0000 |
| POU3F1       | 0.0000 |
| MTDH         | 0.0000 |
| DHFR         | 0.0000 |
| DCLRE1A      | 0.0000 |
| LARP4B       | 0.0000 |
| FAM49A       | 0.0000 |
| MED24        | 0.0000 |
| HSPA13       | 0.0000 |
| ASMTL-AS1    | 0.0000 |
| BCR          | 0.0000 |
| SIN3A        | 0.0000 |
| PARP3        | 0.0000 |
| SNRPB        | 0.0000 |
| WASL         | 0.0000 |
| CRYGA        | 0.0000 |
| APIP         | 0.0000 |
| TBX15        | 0.0000 |
| CALML3       | 0.0000 |
| OR1A1        | 0.0000 |
| COG6         | 0.0000 |
| PEX11G       | 0.0000 |
| C17orf103    | 0.0000 |
| ZNF521       | 0.0000 |
| USP11        | 0.0000 |
| DNA2         | 0.0000 |
| SYT11        | 0.0000 |
| SSX2         | 0.0000 |
| ODF2         | 0.0000 |
| MRPS12       | 0.0000 |
| DGCR8        | 0.0000 |
| SPINK7       | 0.0000 |

|              |        |
|--------------|--------|
| AGMO         | 0.0000 |
| LINC00309    | 0.0000 |
| PEG3         | 0.0000 |
| LY9          | 0.0000 |
| LEAP2        | 0.0000 |
| LOC100294145 | 0.0000 |
| TUBGCP6      | 0.0000 |
| ZNF727       | 0.0000 |
| PTN          | 0.0000 |
| RIT1         | 0.0000 |
| EFHD2        | 0.0000 |
| ACTR6        | 0.0000 |
| DNM1P46      | 0.0000 |
| USP20        | 0.0000 |
| OR1E1        | 0.0000 |
| KHK          | 0.0000 |
| SRSF9        | 0.0000 |
| AGAP2        | 0.0000 |
| RASGRP1      | 0.0000 |
| GRK4         | 0.0000 |
| NCF4         | 0.0000 |
| IL33         | 0.0000 |
| CXorf27      | 0.0000 |
| HNRNPA1L2    | 0.0000 |
| LOC100506689 | 0.0000 |
| ACVR1B       | 0.0000 |
| DRD2         | 0.0000 |
| BCKDK        | 0.0000 |
| C20orf166    | 0.0000 |
| C15orf27     | 0.0000 |
| PHLDA2       | 0.0000 |
| CD7          | 0.0000 |
| NFATC2IP     | 0.0000 |
| NKD1         | 0.0000 |
| CPEB2        | 0.0000 |
| ZNF83        | 0.0000 |
| MOGAT3       | 0.0000 |
| PIGK         | 0.0000 |
| LOC100131089 | 0.0000 |
| GLT8D2       | 0.0000 |
| KIAA1045     | 0.0000 |
| LHFPL1       | 0.0000 |
| PCDHB14      | 0.0000 |
| IRF3         | 0.0000 |
| ETV3         | 0.0000 |
| TM4SF4       | 0.0000 |

|           |        |
|-----------|--------|
| C17orf76  | 0.0000 |
| RNPS1     | 0.0000 |
| DBNDD2    | 0.0000 |
| GDI1      | 0.0000 |
| FAM138A   | 0.0000 |
| DCT       | 0.0000 |
| C17orf67  | 0.0000 |
| DIEXF     | 0.0000 |
| ATXN7L2   | 0.0000 |
| S100A14   | 0.0000 |
| CNDP2     | 0.0000 |
| MYO18A    | 0.0000 |
| SENP2     | 0.0000 |
| ACAA1     | 0.0000 |
| GLRX2     | 0.0000 |
| WDR77     | 0.0000 |
| KRTAP13-3 | 0.0000 |
| CHIC2     | 0.0000 |
| PCDHGB3   | 0.0000 |
| KCNH8     | 0.0000 |
| PORCN     | 0.0000 |
| KLHDC5    | 0.0000 |
| EIF2C3    | 0.0000 |
| HAUS5     | 0.0000 |
| SLITRK6   | 0.0000 |
| MTMR11    | 0.0000 |
| FLJ30901  | 0.0000 |
| C3orf22   | 0.0000 |
| DNAJC17   | 0.0000 |
| AP1B1     | 0.0000 |
| KIR2DS2   | 0.0000 |
| AGL       | 0.0000 |
| KANK1     | 0.0000 |
| ADAT1     | 0.0000 |
| OR5A1     | 0.0000 |
| KLK8      | 0.0000 |
| RPL13P5   | 0.0000 |
| BANK1     | 0.0000 |
| FAM192A   | 0.0000 |
| ERAL1     | 0.0000 |
| SLC5A5    | 0.0000 |
| KCNH4     | 0.0000 |
| PPPDE2    | 0.0000 |
| FIZ1      | 0.0000 |
| DDX11L2   | 0.0000 |
| DSN1      | 0.0000 |



|              |        |
|--------------|--------|
| RAB2A        | 0.0000 |
| ZNF584       | 0.0000 |
| PLEKHH2      | 0.0000 |
| SNTG1        | 0.0000 |
| GPR19        | 0.0000 |
| LRPAP1       | 0.0000 |
| LANCL2       | 0.0000 |
| ZNF844       | 0.0000 |
| RTP1         | 0.0000 |
| TDRD1        | 0.0000 |
| APAF1        | 0.0000 |
| MGMT         | 0.0000 |
| RRNAD1       | 0.0000 |
| MYCN         | 0.0000 |
| YIPF3        | 0.0000 |
| LOC400891    | 0.0000 |
| GJD3         | 0.0000 |
| KIAA0889     | 0.0000 |
| NCEH1        | 0.0000 |
| HES4         | 0.0000 |
| TOB2         | 0.0000 |
| IFT52        | 0.0000 |
| RAP2A        | 0.0000 |
| DHX29        | 0.0000 |
| MIR137HG     | 0.0000 |
| CD48         | 0.0000 |
| POR          | 0.0000 |
| DGCR14       | 0.0000 |
| TTY2         | 0.0000 |
| ZNF404       | 0.0000 |
| C4orf10      | 0.0000 |
| BLID         | 0.0000 |
| LOC100507387 | 0.0000 |
| TRPV2        | 0.0000 |
| MOCS2        | 0.0000 |
| LOC643797    | 0.0000 |
| ZNF626       | 0.0000 |
| RIF1         | 0.0000 |
| GPR156       | 0.0000 |
| ZNF221       | 0.0000 |
| DYRK1B       | 0.0000 |
| TRIM16L      | 0.0000 |
| RAB39B       | 0.0000 |
| APBB1IP      | 0.0000 |
| ESD          | 0.0000 |
| SUN3         | 0.0000 |

|              |        |
|--------------|--------|
| C1orf182     | 0.0000 |
| SLCO1C1      | 0.0000 |
| HSF1         | 0.0000 |
| FBXL12       | 0.0000 |
| DNAH8        | 0.0000 |
| ZC3H4        | 0.0000 |
| HOXA13       | 0.0000 |
| MBD2         | 0.0000 |
| SSBP3        | 0.0000 |
| COX4I2       | 0.0000 |
| PDGFRL       | 0.0000 |
| GPR12        | 0.0000 |
| DCAF12       | 0.0000 |
| TENC1        | 0.0000 |
| DOCK9        | 0.0000 |
| ZFP106       | 0.0000 |
| LOC100131096 | 0.0000 |
| AARS2        | 0.0000 |
| PRO1596      | 0.0000 |
| TTC7B        | 0.0000 |
| SIAH2        | 0.0000 |
| KLHL33       | 0.0000 |
| PGP          | 0.0000 |
| JMJD5        | 0.0000 |
| VWA5A        | 0.0000 |
| ARHGEF16     | 0.0000 |
| ACSM2B       | 0.0000 |
| EIF5         | 0.0000 |
| LAMB3        | 0.0000 |
| NADKD1       | 0.0000 |
| CSK          | 0.0000 |
| GART         | 0.0000 |
| JOSD2        | 0.0000 |
| C15orf24     | 0.0000 |
| RPL37        | 0.0000 |
| SLCO3A1      | 0.0000 |
| KIFC3        | 0.0000 |
| LINC00476    | 0.0000 |
| BCKDHA       | 0.0000 |
| LOC100505545 | 0.0000 |
| TTC7A        | 0.0000 |
| HORMAD1      | 0.0000 |
| KGFLP1       | 0.0000 |
| TRIP12       | 0.0000 |
| IGSF8        | 0.0000 |
| LOC283663    | 0.0000 |

|              |        |
|--------------|--------|
| SLC9A9       | 0.0000 |
| DNAJC25      | 0.0000 |
| LRG1         | 0.0000 |
| RFC5         | 0.0000 |
| ABHD12       | 0.0000 |
| TIMM50       | 0.0000 |
| DCTN4        | 0.0000 |
| DHX15        | 0.0000 |
| SPATA5       | 0.0000 |
| ELSPBP1      | 0.0000 |
| GOT1L1       | 0.0000 |
| LRAT         | 0.0000 |
| ETS1         | 0.0000 |
| LRRTM2       | 0.0000 |
| C7orf31      | 0.0000 |
| LINC00461    | 0.0000 |
| GPR108       | 0.0000 |
| HGF          | 0.0000 |
| LRRC20       | 0.0000 |
| WBP2         | 0.0000 |
| AGFG1        | 0.0000 |
| TROVE2       | 0.0000 |
| PTRF         | 0.0000 |
| CNTD1        | 0.0000 |
| SLC22A4      | 0.0000 |
| MFSD10       | 0.0000 |
| ARRDC5       | 0.0000 |
| MKI67        | 0.0000 |
| TDRD10       | 0.0000 |
| BPGM         | 0.0000 |
| UCP3         | 0.0000 |
| GRB10        | 0.0000 |
| JMJD4        | 0.0000 |
| MCF2L-AS1    | 0.0000 |
| USP9X        | 0.0000 |
| LOC100129407 | 0.0000 |
| OGDHL        | 0.0000 |
| SLC26A6      | 0.0000 |
| YPEL4        | 0.0000 |
| POLR3A       | 0.0000 |
| TNN          | 0.0000 |
| RPRD2        | 0.0000 |
| ZFP112       | 0.0000 |
| ZNF254       | 0.0000 |
| SLC39A9      | 0.0000 |
| LECT2        | 0.0000 |

|              |        |
|--------------|--------|
| CDH4         | 0.0000 |
| PPP1R36      | 0.0000 |
| IMMT         | 0.0000 |
| RNF146       | 0.0000 |
| H2AFY        | 0.0000 |
| SFI1         | 0.0000 |
| LGMN         | 0.0000 |
| INA          | 0.0000 |
| RBL2         | 0.0000 |
| DCTPP1       | 0.0000 |
| HIST1H2BC    | 0.0000 |
| DYNC1LI1     | 0.0000 |
| CRHR1        | 0.0000 |
| LOC646938    | 0.0000 |
| C16orf82     | 0.0000 |
| SH3RF2       | 0.0000 |
| TRAPPC2L     | 0.0000 |
| HTN3         | 0.0000 |
| PAAF1        | 0.0000 |
| HOXB6        | 0.0000 |
| TANK         | 0.0000 |
| CCDC23       | 0.0000 |
| PGS1         | 0.0000 |
| TMC5         | 0.0000 |
| PTGDS        | 0.0000 |
| BOP1         | 0.0000 |
| CTDP1        | 0.0000 |
| SENP7        | 0.0000 |
| LGALS3       | 0.0000 |
| C7orf25      | 0.0000 |
| IFNW1        | 0.0000 |
| LOC541471    | 0.0000 |
| ARAP1        | 0.0000 |
| DDO          | 0.0000 |
| ARID1B       | 0.0000 |
| DECR2        | 0.0000 |
| SPICE1       | 0.0000 |
| SCARA3       | 0.0000 |
| PRKAG1       | 0.0000 |
| RTEL1        | 0.0000 |
| NICN1        | 0.0000 |
| GCFC1-AS1    | 0.0000 |
| GRIN2C       | 0.0000 |
| SF3B4        | 0.0000 |
| IL18R1       | 0.0000 |
| LOC100507780 | 0.0000 |

|           |        |
|-----------|--------|
| LOC494558 | 0.0000 |
| TPH2      | 0.0000 |
| TAC4      | 0.0000 |
| PA2G4     | 0.0000 |
| OBSL1     | 0.0000 |
| TAF5      | 0.0000 |
| GSPT1     | 0.0000 |
| MBNL2     | 0.0000 |
| ADAM20    | 0.0000 |
| POU2F2    | 0.0000 |
| PNLDC1    | 0.0000 |
| SIX4      | 0.0000 |
| TMEM33    | 0.0000 |
| TARSL2    | 0.0000 |
| GPR25     | 0.0000 |
| PSAP      | 0.0000 |
| PAFAH1B1  | 0.0000 |
| NDUFA5    | 0.0000 |
| MARCKS    | 0.0000 |
| CHMP6     | 0.0000 |
| CCBL1     | 0.0000 |
| SKINTL    | 0.0000 |
| LUC7L3    | 0.0000 |
| F2RL1     | 0.0000 |
| VPS26B    | 0.0000 |
| TMEM151A  | 0.0000 |
| GLDN      | 0.0000 |
| SLC6A5    | 0.0000 |
| HSP90AA4P | 0.0000 |
| TRIM58    | 0.0000 |
| TRMT61B   | 0.0000 |
| ANKLE1    | 0.0000 |
| MDC1      | 0.0000 |
| C18orf19  | 0.0000 |
| SPRR1A    | 0.0000 |
| RPF2      | 0.0000 |
| HCFC1     | 0.0000 |
| HEXIM2    | 0.0000 |
| FMNL1     | 0.0000 |
| SUSD3     | 0.0000 |
| LRRC45    | 0.0000 |
| ULK1      | 0.0000 |
| NKPD1     | 0.0000 |
| CHAC1     | 0.0000 |
| JOSD1     | 0.0000 |
| ERI1      | 0.0000 |

|           |        |
|-----------|--------|
| NUDT12    | 0.0000 |
| ILF3      | 0.0000 |
| RSPRY1    | 0.0000 |
| ZNF701    | 0.0000 |
| GDF9      | 0.0000 |
| DPF3      | 0.0000 |
| RCSD1     | 0.0000 |
| CYP3A43   | 0.0000 |
| APOBEC3H  | 0.0000 |
| LOC283665 | 0.0000 |
| CDHR4     | 0.0000 |
| TFF3      | 0.0000 |
| RPL19P12  | 0.0000 |
| PHF21B    | 0.0000 |
| QPRT      | 0.0000 |
| SSX1      | 0.0000 |
| SH3BP1    | 0.0000 |
| PHKA2     | 0.0000 |
| RFX2      | 0.0000 |
| WRB       | 0.0000 |
| C17orf46  | 0.0000 |
| SPC25     | 0.0000 |
| GLIS1     | 0.0000 |
| SYT3      | 0.0000 |
| CMTM3     | 0.0000 |
| NSMCE4A   | 0.0000 |
| DNAJC13   | 0.0000 |
| HTR5A     | 0.0000 |
| PRG3      | 0.0000 |
| A1CF      | 0.0000 |
| CHDH      | 0.0000 |
| PDPK1     | 0.0000 |
| TEX10     | 0.0000 |
| UQCRC1    | 0.0000 |
| OR1S2     | 0.0000 |
| RCE1      | 0.0000 |
| NRD1      | 0.0000 |
| BAZ2A     | 0.0000 |
| LOXL1     | 0.0000 |
| DLC1      | 0.0000 |
| LRRC56    | 0.0000 |
| MGAM      | 0.0000 |
| HMGB4     | 0.0000 |
| URB2      | 0.0000 |
| BRD2      | 0.0000 |
| C1orf159  | 0.0000 |

|              |        |
|--------------|--------|
| GCFC1        | 0.0000 |
| RANBP10      | 0.0000 |
| NOTCH2NL     | 0.0000 |
| PPP3R1       | 0.0000 |
| PRIMA1       | 0.0000 |
| SNX16        | 0.0000 |
| LOC284242    | 0.0000 |
| C6orf27      | 0.0000 |
| FAM160B1     | 0.0000 |
| PSMA4        | 0.0000 |
| TOP1         | 0.0000 |
| PCSK7        | 0.0000 |
| BRF1         | 0.0000 |
| PLEKHA6      | 0.0000 |
| WDR17        | 0.0000 |
| SSR3         | 0.0000 |
| MTM1         | 0.0000 |
| PI16         | 0.0000 |
| LOC100506268 | 0.0000 |
| NUDT18       | 0.0000 |
| TRIM11       | 0.0000 |
| DDX26B       | 0.0000 |
| EPAS1        | 0.0000 |
| CNFN         | 0.0000 |
| COMTD1       | 0.0000 |
| EEF2         | 0.0000 |
| SEMA4G       | 0.0000 |
| SNHG8        | 0.0000 |
| BBS4         | 0.0000 |
| ATXN1        | 0.0000 |
| HERPUD1      | 0.0000 |
| TTC9B        | 0.0000 |
| GBA2         | 0.0000 |
| WBP1         | 0.0000 |
| KIAA0664L3   | 0.0000 |
| LOC100507584 | 0.0000 |
| SLC7A4       | 0.0000 |
| C20orf103    | 0.0000 |
| DHDDS        | 0.0000 |
| LOC100506291 | 0.0000 |
| RBM38        | 0.0000 |
| ZNF446       | 0.0000 |
| EGFLAM       | 0.0000 |
| KRT15        | 0.0000 |
| HSD17B8      | 0.0000 |
| ZNF540       | 0.0000 |

|           |        |
|-----------|--------|
| FDPS      | 0.0000 |
| C6orf47   | 0.0000 |
| SEPT7L    | 0.0000 |
| C1orf133  | 0.0000 |
| F11R      | 0.0000 |
| MAP3K13   | 0.0000 |
| SERTAD4   | 0.0000 |
| SNTB1     | 0.0000 |
| ANGPTL6   | 0.0000 |
| PDE4C     | 0.0000 |
| PLXNC1    | 0.0000 |
| UBE2MP1   | 0.0000 |
| NOX1      | 0.0000 |
| ANGPTL2   | 0.0000 |
| FBRSL1    | 0.0000 |
| HGSNAT    | 0.0000 |
| CLK2      | 0.0000 |
| CAPZA2    | 0.0000 |
| PRDM8     | 0.0000 |
| FGF20     | 0.0000 |
| TROAP     | 0.0000 |
| SIRPA     | 0.0000 |
| GDI2      | 0.0000 |
| CMPK1     | 0.0000 |
| MEOX2     | 0.0000 |
| PAIP1     | 0.0000 |
| MBOAT2    | 0.0000 |
| TLR1      | 0.0000 |
| HEATR1    | 0.0000 |
| FBXO30    | 0.0000 |
| DNAL4     | 0.0000 |
| UBE2R2    | 0.0000 |
| PPAPDC3   | 0.0000 |
| MTHFD2    | 0.0000 |
| CHCHD8    | 0.0000 |
| ACOT7     | 0.0000 |
| METTL9    | 0.0000 |
| MOAP1     | 0.0000 |
| TMEM184A  | 0.0000 |
| CROT      | 0.0000 |
| FBLL1     | 0.0000 |
| LOC400943 | 0.0000 |
| FBP1      | 0.0000 |
| SAMD3     | 0.0000 |
| C19orf26  | 0.0000 |
| KIF5A     | 0.0000 |



|             |        |
|-------------|--------|
| SSX7        | 0.0000 |
| RABGGTB     | 0.0000 |
| C21orf58    | 0.0000 |
| LGR4        | 0.0000 |
| SHARPIN     | 0.0000 |
| TNR         | 0.0000 |
| C1orf168    | 0.0000 |
| BCL2L11     | 0.0000 |
| KIAA1432    | 0.0000 |
| ARMC6       | 0.0000 |
| GK2         | 0.0000 |
| STRBP       | 0.0000 |
| DCAF4       | 0.0000 |
| MYRIP       | 0.0000 |
| CEP97       | 0.0000 |
| PCNA        | 0.0000 |
| FKTN        | 0.0000 |
| GPN3        | 0.0000 |
| GFRA3       | 0.0000 |
| GUCA2B      | 0.0000 |
| CAMK2B      | 0.0000 |
| DSCAM       | 0.0000 |
| GLG1        | 0.0000 |
| RECQL4      | 0.0000 |
| SYAP1       | 0.0000 |
| C4orf29     | 0.0000 |
| LOC339352   | 0.0000 |
| BCL2L2      | 0.0000 |
| UBIAD1      | 0.0000 |
| OR10H2      | 0.0000 |
| KANSL2      | 0.0000 |
| IL11RA      | 0.0000 |
| TSPAN8      | 0.0000 |
| TJAP1       | 0.0000 |
| RNF41       | 0.0000 |
| ZNF227      | 0.0000 |
| TLK1        | 0.0000 |
| OFD1        | 0.0000 |
| ADAMTS9-AS2 | 0.0000 |
| DMBT1       | 0.0000 |
| PRMT2       | 0.0000 |
| TDP2        | 0.0000 |
| C6orf105    | 0.0000 |
| RAB3IL1     | 0.0000 |
| CERK        | 0.0000 |
| COL4A3BP    | 0.0000 |

|              |        |
|--------------|--------|
| TM6SF2       | 0.0000 |
| FAM83C       | 0.0000 |
| NDUFB3       | 0.0000 |
| LOC100506122 | 0.0000 |
| C9orf174     | 0.0000 |
| SBDS         | 0.0000 |
| SFTPA1       | 0.0000 |
| LAMC2        | 0.0000 |
| NCBP1        | 0.0000 |
| ANKRD31      | 0.0000 |
| RP1          | 0.0000 |
| SLC35F2      | 0.0000 |
| ARHGEF9      | 0.0000 |
| DGKZ         | 0.0000 |
| IL2RA        | 0.0000 |
| IPO13        | 0.0000 |
| COL4A1       | 0.0000 |
| SLX1A        | 0.0000 |
| AMHR2        | 0.0000 |
| ATP6V1B2     | 0.0000 |
| RNF43        | 0.0000 |
| LOC100130856 | 0.0000 |
| STAM         | 0.0000 |
| C6orf115     | 0.0000 |
| RAB18        | 0.0000 |
| SLC1A2       | 0.0000 |
| ZNF454       | 0.0000 |
| RPAP3        | 0.0000 |
| SLC9A6       | 0.0000 |
| ZNF362       | 0.0000 |
| UBE2CBP      | 0.0000 |
| ATPBD4       | 0.0000 |
| UNC119       | 0.0000 |
| CCDC166      | 0.0000 |
| SLC22A10     | 0.0000 |
| SLC4A7       | 0.0000 |
| RTF1         | 0.0000 |
| GSN          | 0.0000 |
| RIC8B        | 0.0000 |
| MS4A6E       | 0.0000 |
| TMEM145      | 0.0000 |
| MAT2A        | 0.0000 |
| C14orf129    | 0.0000 |
| CBFA2T3      | 0.0000 |
| PIBF1        | 0.0000 |
| TSPY3        | 0.0000 |

|              |        |
|--------------|--------|
| ZFAT         | 0.0000 |
| PPP5C        | 0.0000 |
| DPPA4        | 0.0000 |
| CYP21A2      | 0.0000 |
| PSMD6        | 0.0000 |
| ASB3         | 0.0000 |
| PROSC        | 0.0000 |
| MAB21L3      | 0.0000 |
| MCM8         | 0.0000 |
| BATF         | 0.0000 |
| MCU          | 0.0000 |
| INTS4        | 0.0000 |
| HSD11B1L     | 0.0000 |
| SALL4        | 0.0000 |
| TADA3        | 0.0000 |
| MCCC2        | 0.0000 |
| KCNAB3       | 0.0000 |
| KIN          | 0.0000 |
| LUZP2        | 0.0000 |
| C6orf211     | 0.0000 |
| TMEM171      | 0.0000 |
| SMS          | 0.0000 |
| OLFM2        | 0.0000 |
| EZR          | 0.0000 |
| DISP2        | 0.0000 |
| RABGGTA      | 0.0000 |
| OBFC2B       | 0.0000 |
| ERP27        | 0.0000 |
| WDR49        | 0.0000 |
| COL12A1      | 0.0000 |
| SERPIND1     | 0.0000 |
| ISYNA1       | 0.0000 |
| LOC100506651 | 0.0000 |
| RCC1         | 0.0000 |
| IRF2BPL      | 0.0000 |
| RAB31        | 0.0000 |
| NRBP1        | 0.0000 |
| MAN2A2       | 0.0000 |
| MYH8         | 0.0000 |
| LOC149837    | 0.0000 |
| RBM14        | 0.0000 |
| LOC286071    | 0.0000 |
| SLC44A4      | 0.0000 |
| ZER1         | 0.0000 |
| C19orf63     | 0.0000 |
| LINGO1       | 0.0000 |

|                        |        |
|------------------------|--------|
| SCNN1G                 | 0.0000 |
| C2orf18                | 0.0000 |
| MIXL1                  | 0.0000 |
| TOMM20L                | 0.0000 |
| HOXC9                  | 0.0000 |
| OPN3                   | 0.0000 |
| RQCD1                  | 0.0000 |
| TCF20                  | 0.0000 |
| ZBTB17                 | 0.0000 |
| MAGEA11                | 0.0000 |
| CD70                   | 0.0000 |
| CENPW                  | 0.0000 |
| C20orf46               | 0.0000 |
| LOC100132287           | 0.0000 |
| MLL2                   | 0.0000 |
| ARL6IP5                | 0.0000 |
| KRT12                  | 0.0000 |
| FOXRED1                | 0.0000 |
| SKAP1                  | 0.0000 |
| CLIP2                  | 0.0000 |
| DTX2P1-UPK3BP1-PMS2P11 | 0.0000 |
| DMAP1                  | 0.0000 |
| EBF1                   | 0.0000 |
| SLC25A48               | 0.0000 |
| ANKS6                  | 0.0000 |
| KIFC2                  | 0.0000 |
| TACR3                  | 0.0000 |
| LOC100128993           | 0.0000 |
| OCEL1                  | 0.0000 |
| TTY7                   | 0.0000 |
| DHPS                   | 0.0000 |
| MSRB3                  | 0.0000 |
| IAPP                   | 0.0000 |
| ZBTB9                  | 0.0000 |
| CA5A                   | 0.0000 |
| CLK4                   | 0.0000 |
| TUBA3C                 | 0.0000 |
| FLJ40194               | 0.0000 |
| SRGN                   | 0.0000 |
| FTO                    | 0.0000 |
| NLRP10                 | 0.0000 |
| NEUROG1                | 0.0000 |
| C20orf152              | 0.0000 |
| RNF180                 | 0.0000 |
| CNTNAP5                | 0.0000 |
| MKI67IP                | 0.0000 |

|              |        |
|--------------|--------|
| SPANXD       | 0.0000 |
| GPR78        | 0.0000 |
| LOC100129198 | 0.0000 |
| FAM55D       | 0.0000 |
| HSPH1        | 0.0000 |
| CCDC65       | 0.0000 |
| TRIM44       | 0.0000 |
| OSTBETA      | 0.0000 |
| FAM76B       | 0.0000 |
| HSFX1        | 0.0000 |
| SKIV2L       | 0.0000 |
| IKZF3        | 0.0000 |
| ZNF518B      | 0.0000 |
| SLC13A2      | 0.0000 |
| ESF1         | 0.0000 |
| RASSF9       | 0.0000 |
| ZNF728       | 0.0000 |
| AKAP6        | 0.0000 |
| CRNKL1       | 0.0000 |
| DDOST        | 0.0000 |
| CTPS         | 0.0000 |
| UGT2A3       | 0.0000 |
| APOBEC3D     | 0.0000 |
| AKAP11       | 0.0000 |
| OLFM4        | 0.0000 |
| NR6A1        | 0.0000 |
| 14-Sep       | 0.0000 |
| GPR89B       | 0.0000 |
| LOC100505875 | 0.0000 |
| MICALL1      | 0.0000 |
| MRPL36       | 0.0000 |
| HDAC6        | 0.0000 |
| C1orf216     | 0.0000 |
| LOC151534    | 0.0000 |
| S100A7A      | 0.0000 |
| LAGE3        | 0.0000 |
| FBLIM1       | 0.0000 |
| KRT31        | 0.0000 |
| ACTC1        | 0.0000 |
| TEX264       | 0.0000 |
| GFRAL        | 0.0000 |
| C11orf87     | 0.0000 |
| LGI1         | 0.0000 |
| HIST2H2AC    | 0.0000 |
| KRTAP13-4    | 0.0000 |
| ZBED5        | 0.0000 |

|           |        |
|-----------|--------|
| DVL1      | 0.0000 |
| ATP6V0A4  | 0.0000 |
| FAM58A    | 0.0000 |
| FGF3      | 0.0000 |
| ESRRG     | 0.0000 |
| SLC46A2   | 0.0000 |
| LARP1B    | 0.0000 |
| CA9       | 0.0000 |
| B3GNT3    | 0.0000 |
| UQCRH     | 0.0000 |
| ELP3      | 0.0000 |
| BLM       | 0.0000 |
| HKR1      | 0.0000 |
| EED       | 0.0000 |
| POU2F3    | 0.0000 |
| BOLA2B    | 0.0000 |
| MAGEB4    | 0.0000 |
| GRHL2     | 0.0000 |
| ECH1      | 0.0000 |
| GET4      | 0.0000 |
| BRD1      | 0.0000 |
| HNRNPH3   | 0.0000 |
| NFAT5     | 0.0000 |
| WBP5      | 0.0000 |
| SAP30L    | 0.0000 |
| SPRR1B    | 0.0000 |
| XPNPEP1   | 0.0000 |
| MRPS23    | 0.0000 |
| C6orf126  | 0.0000 |
| EGF       | 0.0000 |
| MCM3      | 0.0000 |
| RRN3P3    | 0.0000 |
| SLC10A7   | 0.0000 |
| CD19      | 0.0000 |
| KRT32     | 0.0000 |
| CLTC      | 0.0000 |
| IRX4      | 0.0000 |
| RBBP4     | 0.0000 |
| KIF13A    | 0.0000 |
| NUDT21    | 0.0000 |
| FAM100A   | 0.0000 |
| LAS1L     | 0.0000 |
| LOC147804 | 0.0000 |
| FAT3      | 0.0000 |
| C2orf47   | 0.0000 |
| SAMSN1    | 0.0000 |

|              |        |
|--------------|--------|
| YTHDF1       | 0.0000 |
| ACER1        | 0.0000 |
| LEF1         | 0.0000 |
| CWC25        | 0.0000 |
| PCMT1        | 0.0000 |
| OR10H4       | 0.0000 |
| TP73-AS1     | 0.0000 |
| CHD6         | 0.0000 |
| MTA1         | 0.0000 |
| BRWD1-IT2    | 0.0000 |
| PPP1R3F      | 0.0000 |
| RSC1A1       | 0.0000 |
| CDCA7L       | 0.0000 |
| MYH7         | 0.0000 |
| FAM203A      | 0.0000 |
| YPEL1        | 0.0000 |
| PRICKLE1     | 0.0000 |
| CIITA        | 0.0000 |
| LOC100652749 | 0.0000 |
| MTERFD2      | 0.0000 |
| CACYBP       | 0.0000 |
| LRRTM4       | 0.0000 |
| PIGB         | 0.0000 |
| ZNF248       | 0.0000 |
| ZKSCAN5      | 0.0000 |
| PABPC5       | 0.0000 |
| LFNG         | 0.0000 |
| SCOC         | 0.0000 |
| TMEM238      | 0.0000 |
| FAM193B      | 0.0000 |
| KLHL15       | 0.0000 |
| C10orf137    | 0.0000 |
| FEV          | 0.0000 |
| ANKRD53      | 0.0000 |
| C3orf17      | 0.0000 |
| NRXN2        | 0.0000 |
| ERLEC1       | 0.0000 |
| C20orf54     | 0.0000 |
| MORN5        | 0.0000 |
| SIPA1L2      | 0.0000 |
| MORC2        | 0.0000 |
| SASS6        | 0.0000 |
| TADA1        | 0.0000 |
| MPP6         | 0.0000 |
| CLN3         | 0.0000 |
| APOC3        | 0.0000 |

|           |        |
|-----------|--------|
| PACRG     | 0.0000 |
| PARL      | 0.0000 |
| TXNDC12   | 0.0000 |
| QSOX2     | 0.0000 |
| CDC42SE1  | 0.0000 |
| MAL2      | 0.0000 |
| F11       | 0.0000 |
| ARHGAP26  | 0.0000 |
| NUB1      | 0.0000 |
| PNPLA2    | 0.0000 |
| ERP44     | 0.0000 |
| KRT6A     | 0.0000 |
| CLN6      | 0.0000 |
| ZNF490    | 0.0000 |
| SGPP1     | 0.0000 |
| THSD7B    | 0.0000 |
| KCNA10    | 0.0000 |
| DPCD      | 0.0000 |
| NXT1      | 0.0000 |
| LOC146336 | 0.0000 |
| ZNF322    | 0.0000 |
| GBGT1     | 0.0000 |
| HMP19     | 0.0000 |
| KLRC1     | 0.0000 |
| FAM155A   | 0.0000 |
| MBD3L2    | 0.0000 |
| POTEM     | 0.0000 |
| MASP1     | 0.0000 |
| C5orf44   | 0.0000 |
| GIMAP1    | 0.0000 |
| RHCE      | 0.0000 |
| TMEM42    | 0.0000 |
| DNAJB11   | 0.0000 |
| TTYH1     | 0.0000 |
| DGAT2     | 0.0000 |
| PROP1     | 0.0000 |
| RGL4      | 0.0000 |
| LOC644189 | 0.0000 |
| TWSG1     | 0.0000 |
| YME1L1    | 0.0000 |
| TAB2      | 0.0000 |
| DNHD1     | 0.0000 |
| CHURC1    | 0.0000 |
| ACLY      | 0.0000 |
| C12orf32  | 0.0000 |
| ARSA      | 0.0000 |



|              |        |
|--------------|--------|
| PLK5         | 0.0000 |
| WBP4         | 0.0000 |
| TBC1D23      | 0.0000 |
| MOV10L1      | 0.0000 |
| C6orf125     | 0.0000 |
| C16orf55     | 0.0000 |
| TAPBP        | 0.0000 |
| CRKL         | 0.0000 |
| PDE3B        | 0.0000 |
| TRPC4        | 0.0000 |
| NXPH4        | 0.0000 |
| PPP6R3       | 0.0000 |
| INHBB        | 0.0000 |
| KCNJ11       | 0.0000 |
| HNRNPF       | 0.0000 |
| PALM         | 0.0000 |
| ZNF330       | 0.0000 |
| SYS1         | 0.0000 |
| LENG1        | 0.0000 |
| TMEM95       | 0.0000 |
| P2RY1        | 0.0000 |
| RELL2        | 0.0000 |
| CDC42BPG     | 0.0000 |
| TP53I11      | 0.0000 |
| CDH26        | 0.0000 |
| RBM24        | 0.0000 |
| MED18        | 0.0000 |
| ANXA3        | 0.0000 |
| C17orf65     | 0.0000 |
| CELF5        | 0.0000 |
| TAOK2        | 0.0000 |
| C12orf26     | 0.0000 |
| ZFP42        | 0.0000 |
| LGSN         | 0.0000 |
| ZNF627       | 0.0000 |
| IGF2-AS      | 0.0000 |
| FAM116A      | 0.0000 |
| LOC100287813 | 0.0000 |
| PLEKHO2      | 0.0000 |
| IGLL5        | 0.0000 |
| C14orf80     | 0.0000 |
| GBP7         | 0.0000 |
| GTF2F1       | 0.0000 |
| NCOA7        | 0.0000 |
| TSHZ3        | 0.0000 |
| DEFA5        | 0.0000 |

|            |        |
|------------|--------|
| LAPTM5     | 0.0000 |
| FOXE1      | 0.0000 |
| SRP68      | 0.0000 |
| PCDHGA2    | 0.0000 |
| FLJ31306   | 0.0000 |
| IGLV6-57   | 0.0000 |
| IKBKE      | 0.0000 |
| B3GNTL1    | 0.0000 |
| SPDYE4     | 0.0000 |
| AKR7A2P1   | 0.0000 |
| MFAP2      | 0.0000 |
| PP12613    | 0.0000 |
| TMEM115    | 0.0000 |
| OTP        | 0.0000 |
| POLR1E     | 0.0000 |
| IWS1       | 0.0000 |
| CSGALNACT1 | 0.0000 |
| ITGB8      | 0.0000 |
| HIVEP2     | 0.0000 |
| ZC3HAV1L   | 0.0000 |
| C20orf141  | 0.0000 |
| SYNJ1      | 0.0000 |
| FBXO25     | 0.0000 |
| PRAMEF16   | 0.0000 |
| PDIK1L     | 0.0000 |
| KRTAP7-1   | 0.0000 |
| AOC3       | 0.0000 |
| FAM168A    | 0.0000 |
| TUT1       | 0.0000 |
| USP46      | 0.0000 |
| ZNF300     | 0.0000 |
| MICALL2    | 0.0000 |
| SCGBL      | 0.0000 |
| ARHGAP5    | 0.0000 |
| CXCR6      | 0.0000 |
| RBFOX2     | 0.0000 |
| ZNF524     | 0.0000 |
| ALB        | 0.0000 |
| LYZL4      | 0.0000 |
| LRRC9      | 0.0000 |
| KRTAP4-2   | 0.0000 |
| LOC154761  | 0.0000 |
| RASSF4     | 0.0000 |
| RGS19      | 0.0000 |
| IL12A      | 0.0000 |
| TUBGCP2    | 0.0000 |

|              |        |
|--------------|--------|
| RAP2C        | 0.0000 |
| ITGB2        | 0.0000 |
| TGIF2        | 0.0000 |
| SLC9A3R1     | 0.0000 |
| LOC728012    | 0.0000 |
| HNRNPA2B1    | 0.0000 |
| LOC100127891 | 0.0000 |
| ASPSCR1      | 0.0000 |
| DCBLD2       | 0.0000 |
| LSM6         | 0.0000 |
| BCL2L10      | 0.0000 |
| WDR64        | 0.0000 |
| PCBD2        | 0.0000 |
| DCAF8        | 0.0000 |
| ODZ3         | 0.0000 |
| ATP5G3       | 0.0000 |
| UNC5D        | 0.0000 |
| EDEM3        | 0.0000 |
| RBP7         | 0.0000 |
| INPP5J       | 0.0000 |
| LOC100131150 | 0.0000 |
| EIF2AK1      | 0.0000 |
| ACSL6        | 0.0000 |
| RABGAP1L     | 0.0000 |
| YWHAB        | 0.0000 |
| KRTAP4-8     | 0.0000 |
| GOLIM4       | 0.0000 |
| LIMS3        | 0.0000 |
| SYT15        | 0.0000 |
| KCTD19       | 0.0000 |
| SLC18A2      | 0.0000 |
| A2ML1        | 0.0000 |
| AACS         | 0.0000 |
| AANAT        | 0.0000 |
| ABCA11P      | 0.0000 |
| ABCA9        | 0.0000 |
| ABCC6        | 0.0000 |
| ABCD3        | 0.0000 |
| ABCF1        | 0.0000 |
| ABHD11       | 0.0000 |
| ABHD14B      | 0.0000 |
| ABTB1        | 0.0000 |
| ACADM        | 0.0000 |
| ACADSB       | 0.0000 |
| ACAN         | 0.0000 |
| ACAT2        | 0.0000 |

|          |        |
|----------|--------|
| ACBD4    | 0.0000 |
| ACHE     | 0.0000 |
| ACOT4    | 0.0000 |
| ACOX3    | 0.0000 |
| ACR      | 0.0000 |
| ACRV1    | 0.0000 |
| ACSBG2   | 0.0000 |
| ACSL1    | 0.0000 |
| ACSL5    | 0.0000 |
| ACSM3    | 0.0000 |
| ACTL6B   | 0.0000 |
| ACTN4    | 0.0000 |
| ACYP1    | 0.0000 |
| ADAD2    | 0.0000 |
| ADAM10   | 0.0000 |
| ADAM15   | 0.0000 |
| ADAM2    | 0.0000 |
| ADAM6    | 0.0000 |
| ADAMTS4  | 0.0000 |
| ADH1C    | 0.0000 |
| ADH7     | 0.0000 |
| ADIPOR2  | 0.0000 |
| ADNP2    | 0.0000 |
| ADORA3   | 0.0000 |
| ADPGK    | 0.0000 |
| ADPRH    | 0.0000 |
| ADPRHL2  | 0.0000 |
| ADRB2    | 0.0000 |
| ADRM1    | 0.0000 |
| AFG3L2   | 0.0000 |
| AFMID    | 0.0000 |
| AGPAT3   | 0.0000 |
| AGTR2    | 0.0000 |
| AGTRAP   | 0.0000 |
| AGXT2    | 0.0000 |
| AIFM3    | 0.0000 |
| AJUBA    | 0.0000 |
| AK2      | 0.0000 |
| AKAP7    | 0.0000 |
| AKR1C4   | 0.0000 |
| AKR7A2   | 0.0000 |
| AKT1S1   | 0.0000 |
| ALDH16A1 | 0.0000 |
| ALDH7A1  | 0.0000 |
| ALG3     | 0.0000 |
| ALG9     | 0.0000 |

|              |        |
|--------------|--------|
| ALK          | 0.0000 |
| ALKBH1       | 0.0000 |
| ALLC         | 0.0000 |
| AMOTL2       | 0.0000 |
| ANAPC5       | 0.0000 |
| ANGPT4       | 0.0000 |
| ANGPTL7      | 0.0000 |
| ANKHD1       | 0.0000 |
| ANKRD26      | 0.0000 |
| ANKRD30BL    | 0.0000 |
| ANKRD33B     | 0.0000 |
| ANKRD36BP2   | 0.0000 |
| ANKRD5       | 0.0000 |
| ANKRD54      | 0.0000 |
| ANKRD55      | 0.0000 |
| ANKRD6       | 0.0000 |
| ANKS3        | 0.0000 |
| ANXA7        | 0.0000 |
| AP1S2        | 0.0000 |
| AP2A2        | 0.0000 |
| AP2B1        | 0.0000 |
| AP2M1        | 0.0000 |
| AP3M1        | 0.0000 |
| APBB1        | 0.0000 |
| APC2         | 0.0000 |
| APCDD1L      | 0.0000 |
| APEH         | 0.0000 |
| APEX2        | 0.0000 |
| APLN         | 0.0000 |
| APOA1BP      | 0.0000 |
| APOBEC2      | 0.0000 |
| APOBEC3A     | 0.0000 |
| APOBR        | 0.0000 |
| APOL3        | 0.0000 |
| APPBP2       | 0.0000 |
| AQP1         | 0.0000 |
| AQP5         | 0.0000 |
| ARAP2        | 0.0000 |
| ARFIP2       | 0.0000 |
| ARHGAP10     | 0.0000 |
| ARHGAP22     | 0.0000 |
| ARHGAP36     | 0.0000 |
| ARHGEF17     | 0.0000 |
| ARHGEF26-AS1 | 0.0000 |
| ARHGEF37     | 0.0000 |
| ARID4A       | 0.0000 |

|          |        |
|----------|--------|
| ARL5B    | 0.0000 |
| ARMCX2   | 0.0000 |
| ARPC4    | 0.0000 |
| ARRDC3   | 0.0000 |
| ARV1     | 0.0000 |
| ASAP1    | 0.0000 |
| ASB16    | 0.0000 |
| ASB2     | 0.0000 |
| ASB6     | 0.0000 |
| ASGR2    | 0.0000 |
| ASH1L    | 0.0000 |
| ASPM     | 0.0000 |
| ASTE1    | 0.0000 |
| ATAD1    | 0.0000 |
| ATAD3A   | 0.0000 |
| ATG10    | 0.0000 |
| ATG4A    | 0.0000 |
| ATOH1    | 0.0000 |
| ATP13A4  | 0.0000 |
| ATP13A5  | 0.0000 |
| ATP1B1   | 0.0000 |
| ATP1B3   | 0.0000 |
| ATP2A1   | 0.0000 |
| ATP5SL   | 0.0000 |
| ATP6V1F  | 0.0000 |
| ATP6V1G2 | 0.0000 |
| ATP6V1G3 | 0.0000 |
| ATR      | 0.0000 |
| ATRIP    | 0.0000 |
| ATRN     | 0.0000 |
| ATXN1L   | 0.0000 |
| ATXN2L   | 0.0000 |
| ATXN3L   | 0.0000 |
| AVEN     | 0.0000 |
| AZGP1    | 0.0000 |
| AZI1     | 0.0000 |
| B3GNT9   | 0.0000 |
| B4GALT1  | 0.0000 |
| B4GALT6  | 0.0000 |
| BAG2     | 0.0000 |
| BANP     | 0.0000 |
| BAP1     | 0.0000 |
| BARD1    | 0.0000 |
| BAZ2B    | 0.0000 |
| BBOX1    | 0.0000 |
| BBS9     | 0.0000 |

|           |        |
|-----------|--------|
| BCL11B    | 0.0000 |
| BCL2L1    | 0.0000 |
| BCS1L     | 0.0000 |
| BEST2     | 0.0000 |
| BEST4     | 0.0000 |
| BHLHE40   | 0.0000 |
| BIRC3     | 0.0000 |
| BMP2      | 0.0000 |
| BMP2K     | 0.0000 |
| BOLA3     | 0.0000 |
| BOLL      | 0.0000 |
| BORA      | 0.0000 |
| BPESC1    | 0.0000 |
| BPIFA1    | 0.0000 |
| BPIFB2    | 0.0000 |
| BRDT      | 0.0000 |
| BRE       | 0.0000 |
| BRMS1     | 0.0000 |
| BRPF1     | 0.0000 |
| BRPF3     | 0.0000 |
| BSND      | 0.0000 |
| BTG3      | 0.0000 |
| BUB1B     | 0.0000 |
| BYSL      | 0.0000 |
| C10orf107 | 0.0000 |
| C10orf35  | 0.0000 |
| C10orf53  | 0.0000 |
| C11orf49  | 0.0000 |
| C11orf51  | 0.0000 |
| C11orf54  | 0.0000 |
| C11orf58  | 0.0000 |
| C11orf65  | 0.0000 |
| C11orf68  | 0.0000 |
| C11orf80  | 0.0000 |
| C11orf92  | 0.0000 |
| C12orf10  | 0.0000 |
| C12orf11  | 0.0000 |
| C12orf29  | 0.0000 |
| C12orf37  | 0.0000 |
| C12orf49  | 0.0000 |
| C12orf5   | 0.0000 |
| C12orf61  | 0.0000 |
| C12orf63  | 0.0000 |
| C12orf73  | 0.0000 |
| C14orf166 | 0.0000 |
| C14orf43  | 0.0000 |

|           |        |
|-----------|--------|
| C14orf48  | 0.0000 |
| C15orf2   | 0.0000 |
| C15orf23  | 0.0000 |
| C15orf44  | 0.0000 |
| C15orf57  | 0.0000 |
| C16orf11  | 0.0000 |
| C16orf62  | 0.0000 |
| C16orf80  | 0.0000 |
| C16orf95  | 0.0000 |
| C17orf47  | 0.0000 |
| C17orf50  | 0.0000 |
| C17orf57  | 0.0000 |
| C17orf63  | 0.0000 |
| C18orf10  | 0.0000 |
| C19orf2   | 0.0000 |
| C19orf51  | 0.0000 |
| C19orf68  | 0.0000 |
| C1orf105  | 0.0000 |
| C1orf112  | 0.0000 |
| C1orf124  | 0.0000 |
| C1orf129  | 0.0000 |
| C1orf131  | 0.0000 |
| C1orf158  | 0.0000 |
| C1orf162  | 0.0000 |
| C1orf64   | 0.0000 |
| C1orf87   | 0.0000 |
| C1QBP     | 0.0000 |
| C1QL2     | 0.0000 |
| C1QTNF5   | 0.0000 |
| C20orf144 | 0.0000 |
| C20orf151 | 0.0000 |
| C20orf165 | 0.0000 |
| C20orf177 | 0.0000 |
| C20orf3   | 0.0000 |
| C20orf72  | 0.0000 |
| C21orf104 | 0.0000 |
| C21orf2   | 0.0000 |
| C21orf96  | 0.0000 |
| C22orf25  | 0.0000 |
| C22orf28  | 0.0000 |
| C22orf45  | 0.0000 |
| C2CD2     | 0.0000 |
| C2CD4A    | 0.0000 |
| C2orf54   | 0.0000 |
| C2orf68   | 0.0000 |
| C3orf23   | 0.0000 |



|          |        |
|----------|--------|
| C3orf33  | 0.0000 |
| C3orf37  | 0.0000 |
| C3orf38  | 0.0000 |
| C3orf52  | 0.0000 |
| C3orf62  | 0.0000 |
| C4orf19  | 0.0000 |
| C4orf21  | 0.0000 |
| C4orf36  | 0.0000 |
| C4orf37  | 0.0000 |
| C5orf22  | 0.0000 |
| C5orf42  | 0.0000 |
| C6orf120 | 0.0000 |
| C6orf145 | 0.0000 |
| C6orf201 | 0.0000 |
| C6orf208 | 0.0000 |
| C6orf218 | 0.0000 |
| C7orf23  | 0.0000 |
| C7orf51  | 0.0000 |
| C7orf57  | 0.0000 |
| C7orf58  | 0.0000 |
| C7orf60  | 0.0000 |
| C7orf63  | 0.0000 |
| C8orf46  | 0.0000 |
| C8orf59  | 0.0000 |
| C8orf60  | 0.0000 |
| C8orf77  | 0.0000 |
| C9orf11  | 0.0000 |
| C9orf128 | 0.0000 |
| C9orf163 | 0.0000 |
| C9orf40  | 0.0000 |
| C9orf46  | 0.0000 |
| C9orf47  | 0.0000 |
| C9orf50  | 0.0000 |
| C9orf71  | 0.0000 |
| CA4      | 0.0000 |
| CACNB4   | 0.0000 |
| CADM3    | 0.0000 |
| CALCRL   | 0.0000 |
| CAMK1G   | 0.0000 |
| CANT1    | 0.0000 |
| CAPN7    | 0.0000 |
| CAPRIN1  | 0.0000 |
| CAPZA3   | 0.0000 |
| CAPZB    | 0.0000 |
| CARD10   | 0.0000 |
| CARD18   | 0.0000 |

|          |        |
|----------|--------|
| CASP1    | 0.0000 |
| CATSPER2 | 0.0000 |
| CBLN2    | 0.0000 |
| CBX3     | 0.0000 |
| CCDC104  | 0.0000 |
| CCDC106  | 0.0000 |
| CCDC109B | 0.0000 |
| CCDC114  | 0.0000 |
| CCDC115  | 0.0000 |
| CCDC134  | 0.0000 |
| CCDC137  | 0.0000 |
| CCDC142  | 0.0000 |
| CCDC159  | 0.0000 |
| CCDC168  | 0.0000 |
| CCDC36   | 0.0000 |
| CCDC50   | 0.0000 |
| CCDC66   | 0.0000 |
| CCDC76   | 0.0000 |
| CCDC91   | 0.0000 |
| CCDC99   | 0.0000 |
| CCL16    | 0.0000 |
| CCNA1    | 0.0000 |
| CCNJ     | 0.0000 |
| CCNJL    | 0.0000 |
| CCNL2    | 0.0000 |
| CCR10    | 0.0000 |
| CCR6     | 0.0000 |
| CD1A     | 0.0000 |
| CD200R1  | 0.0000 |
| CD300C   | 0.0000 |
| CD3E     | 0.0000 |
| CD47     | 0.0000 |
| CD55     | 0.0000 |
| CD99L2   | 0.0000 |
| CD99P1   | 0.0000 |
| CDC25B   | 0.0000 |
| CDC37L1  | 0.0000 |
| CDC42EP4 | 0.0000 |
| CDC45    | 0.0000 |
| CDC7     | 0.0000 |
| CDC73    | 0.0000 |
| CDH11    | 0.0000 |
| CDIPT    | 0.0000 |
| CDK1     | 0.0000 |
| CDK10    | 0.0000 |
| CDK5R2   | 0.0000 |

|           |        |
|-----------|--------|
| CDKN2C    | 0.0000 |
| CDR2      | 0.0000 |
| CDYL      | 0.0000 |
| CDYL2     | 0.0000 |
| CEACAM20  | 0.0000 |
| CEACAM6   | 0.0000 |
| CEACAM8   | 0.0000 |
| CECR2     | 0.0000 |
| CELA2B    | 0.0000 |
| CEND1     | 0.0000 |
| CENPB     | 0.0000 |
| CENPC1    | 0.0000 |
| CENPE     | 0.0000 |
| CENPI     | 0.0000 |
| CENPO     | 0.0000 |
| CEP250    | 0.0000 |
| CEP44     | 0.0000 |
| CEP89     | 0.0000 |
| CEPT1     | 0.0000 |
| CETN3     | 0.0000 |
| CETN4P    | 0.0000 |
| CFDP1     | 0.0000 |
| CFHR3     | 0.0000 |
| CFHR4     | 0.0000 |
| CHCHD10   | 0.0000 |
| CHCHD5    | 0.0000 |
| CHD4      | 0.0000 |
| CHD8      | 0.0000 |
| CHFR      | 0.0000 |
| CHGA      | 0.0000 |
| CHIC1     | 0.0000 |
| CHKA      | 0.0000 |
| CHMP1A    | 0.0000 |
| CHMP1B    | 0.0000 |
| CHODL     | 0.0000 |
| CHRD      | 0.0000 |
| CHRM2     | 0.0000 |
| CHRNA7    | 0.0000 |
| CHST13    | 0.0000 |
| CHST15    | 0.0000 |
| CHST3     | 0.0000 |
| CHST9-AS1 | 0.0000 |
| CHUK      | 0.0000 |
| CIAO1     | 0.0000 |
| CIDEC     | 0.0000 |
| CIR1      | 0.0000 |

|         |        |
|---------|--------|
| CISD1   | 0.0000 |
| CISD3   | 0.0000 |
| CKAP2   | 0.0000 |
| CLASRP  | 0.0000 |
| CLCA3P  | 0.0000 |
| CLCN1   | 0.0000 |
| CLDN14  | 0.0000 |
| CLDN23  | 0.0000 |
| CLEC2B  | 0.0000 |
| CLOCK   | 0.0000 |
| CLPS    | 0.0000 |
| CLPTM1  | 0.0000 |
| CLSTN1  | 0.0000 |
| CLVS1   | 0.0000 |
| CMAS    | 0.0000 |
| CMIP    | 0.0000 |
| CNIH4   | 0.0000 |
| CNKSR2  | 0.0000 |
| CNOT6L  | 0.0000 |
| CNOT8   | 0.0000 |
| CNTF    | 0.0000 |
| CNTN1   | 0.0000 |
| CNTNAP1 | 0.0000 |
| COASY   | 0.0000 |
| COG1    | 0.0000 |
| COL19A1 | 0.0000 |
| COL24A1 | 0.0000 |
| COL25A1 | 0.0000 |
| COQ6    | 0.0000 |
| COQ7    | 0.0000 |
| CORO1B  | 0.0000 |
| CORO2B  | 0.0000 |
| COTL1   | 0.0000 |
| COX6B2  | 0.0000 |
| CPD     | 0.0000 |
| CPLX4   | 0.0000 |
| CPNE3   | 0.0000 |
| CPNE7   | 0.0000 |
| CPNE8   | 0.0000 |
| CPOX    | 0.0000 |
| CPXCR1  | 0.0000 |
| CRABP2  | 0.0000 |
| CREG1   | 0.0000 |
| CRHR2   | 0.0000 |
| CRISP3  | 0.0000 |
| CRLF3   | 0.0000 |

|          |        |
|----------|--------|
| CRLS1    | 0.0000 |
| CRYGB    | 0.0000 |
| CRYZ     | 0.0000 |
| CSAG1    | 0.0000 |
| CSDA     | 0.0000 |
| CSDC2    | 0.0000 |
| CSF2RA   | 0.0000 |
| CSF3     | 0.0000 |
| CSNK1G1  | 0.0000 |
| CSRNP3   | 0.0000 |
| CST2     | 0.0000 |
| CSTT     | 0.0000 |
| CTAGE7P  | 0.0000 |
| CTBP2    | 0.0000 |
| CTBS     | 0.0000 |
| CTCFL    | 0.0000 |
| CTDSP2   | 0.0000 |
| CTDSPL2  | 0.0000 |
| CTHRC1   | 0.0000 |
| CTIF     | 0.0000 |
| CTNNA1   | 0.0000 |
| CTNNB1   | 0.0000 |
| CTSA     | 0.0000 |
| CTSB     | 0.0000 |
| CTSO     | 0.0000 |
| CTSS     | 0.0000 |
| CUL2     | 0.0000 |
| CUL3     | 0.0000 |
| CUTA     | 0.0000 |
| CUTC     | 0.0000 |
| CUX2     | 0.0000 |
| CXorf38  | 0.0000 |
| CXorf58  | 0.0000 |
| CYB5D2   | 0.0000 |
| CYBASC3  | 0.0000 |
| CYHR1    | 0.0000 |
| CYLC2    | 0.0000 |
| CYLD     | 0.0000 |
| CYP11B1  | 0.0000 |
| CYP26B1  | 0.0000 |
| CYP2D6   | 0.0000 |
| CYP2W1   | 0.0000 |
| CYP3A5   | 0.0000 |
| CYP4F30P | 0.0000 |
| CYP4Z2P  | 0.0000 |
| CYP51A1  | 0.0000 |

|               |        |
|---------------|--------|
| CYTL1         | 0.0000 |
| DACH2         | 0.0000 |
| DBR1          | 0.0000 |
| DCAF5         | 0.0000 |
| DCDC5         | 0.0000 |
| DCK           | 0.0000 |
| DCST2         | 0.0000 |
| DCUN1D4       | 0.0000 |
| DCXR          | 0.0000 |
| DDA1          | 0.0000 |
| DDHD2         | 0.0000 |
| DDR1          | 0.0000 |
| DDT           | 0.0000 |
| DDX41         | 0.0000 |
| DDX42         | 0.0000 |
| DDX49         | 0.0000 |
| DDX51         | 0.0000 |
| DDX52         | 0.0000 |
| DDX54         | 0.0000 |
| 1-Dec         | 0.0000 |
| DEFB118       | 0.0000 |
| DEGS1         | 0.0000 |
| DENND4A       | 0.0000 |
| DGKE          | 0.0000 |
| DGKI          | 0.0000 |
| DHH           | 0.0000 |
| DHTKD1        | 0.0000 |
| DHX16         | 0.0000 |
| DHX32         | 0.0000 |
| DHX9          | 0.0000 |
| DIABLO        | 0.0000 |
| DKFZP434L187  | 0.0000 |
| DKFZp434L192  | 0.0000 |
| DKFZP586B0319 | 0.0000 |
| DKFZP586K1520 | 0.0000 |
| DMP1          | 0.0000 |
| DMRTB1        | 0.0000 |
| DMTF1         | 0.0000 |
| DMWD          | 0.0000 |
| DNAAF2        | 0.0000 |
| DNAH17        | 0.0000 |
| DNAJA2        | 0.0000 |
| DNAJB9        | 0.0000 |
| DNAJC19       | 0.0000 |
| DNAJC2        | 0.0000 |
| DNAJC7        | 0.0000 |

|           |        |
|-----------|--------|
| DNER      | 0.0000 |
| DNM1L     | 0.0000 |
| DNMT3A    | 0.0000 |
| DOCK10    | 0.0000 |
| DPM1      | 0.0000 |
| DPM2      | 0.0000 |
| DPPA2     | 0.0000 |
| DPYD      | 0.0000 |
| DPYSL4    | 0.0000 |
| DRAM2     | 0.0000 |
| DRG1      | 0.0000 |
| DROSHA    | 0.0000 |
| DSTYK     | 0.0000 |
| DTL       | 0.0000 |
| DTNA      | 0.0000 |
| DTNB      | 0.0000 |
| DTX3      | 0.0000 |
| DUS4L     | 0.0000 |
| DUSP11    | 0.0000 |
| DUSP9     | 0.0000 |
| DVL2      | 0.0000 |
| DYNLL2    | 0.0000 |
| DYNLT3    | 0.0000 |
| EAF1      | 0.0000 |
| EAF2      | 0.0000 |
| EBAG9     | 0.0000 |
| EBF4      | 0.0000 |
| EBNA1BP2  | 0.0000 |
| EDAR      | 0.0000 |
| EDC4      | 0.0000 |
| EDEM1     | 0.0000 |
| EEF1B2    | 0.0000 |
| EEF1D     | 0.0000 |
| EFCAB11   | 0.0000 |
| EFEMP1    | 0.0000 |
| EFNB3     | 0.0000 |
| EGLN1     | 0.0000 |
| EGLN3     | 0.0000 |
| EID3      | 0.0000 |
| EIF1B     | 0.0000 |
| EIF2B5    | 0.0000 |
| EIF2C4    | 0.0000 |
| EIF4A2    | 0.0000 |
| EIF4E3    | 0.0000 |
| EIF4ENIF1 | 0.0000 |
| EIF4G2    | 0.0000 |

|         |        |
|---------|--------|
| EIF5A   | 0.0000 |
| ELF5    | 0.0000 |
| ELK1    | 0.0000 |
| ELL     | 0.0000 |
| ELL3    | 0.0000 |
| ELMO2   | 0.0000 |
| ELMO3   | 0.0000 |
| ELOF1   | 0.0000 |
| ELOVL3  | 0.0000 |
| ELP2    | 0.0000 |
| EMID1   | 0.0000 |
| EMILIN1 | 0.0000 |
| EMILIN3 | 0.0000 |
| EML6    | 0.0000 |
| EMP2    | 0.0000 |
| EMR4P   | 0.0000 |
| EMX1    | 0.0000 |
| ENAM    | 0.0000 |
| ENO2    | 0.0000 |
| ENO3    | 0.0000 |
| ENOX1   | 0.0000 |
| ENTPD2  | 0.0000 |
| ENTPD3  | 0.0000 |
| ENTPD8  | 0.0000 |
| EPHA7   | 0.0000 |
| EPOR    | 0.0000 |
| EPS15   | 0.0000 |
| EPS15L1 | 0.0000 |
| EPSTI1  | 0.0000 |
| ERCC5   | 0.0000 |
| ERCC6   | 0.0000 |
| ERCC8   | 0.0000 |
| ERGIC1  | 0.0000 |
| ERLIN1  | 0.0000 |
| ERMAP   | 0.0000 |
| ERMN    | 0.0000 |
| ERN2    | 0.0000 |
| ERO1L   | 0.0000 |
| ERVV-2  | 0.0000 |
| ETAA1   | 0.0000 |
| ETFA    | 0.0000 |
| EVL     | 0.0000 |
| EVPL    | 0.0000 |
| EXOC8   | 0.0000 |
| EXOSC3  | 0.0000 |
| EXOSC9  | 0.0000 |



|          |        |
|----------|--------|
| EXT1     | 0.0000 |
| EYA1     | 0.0000 |
| F5       | 0.0000 |
| F9       | 0.0000 |
| FAF1     | 0.0000 |
| FAM104B  | 0.0000 |
| FAM109B  | 0.0000 |
| FAM110B  | 0.0000 |
| FAM111B  | 0.0000 |
| FAM118A  | 0.0000 |
| FAM120C  | 0.0000 |
| FAM123C  | 0.0000 |
| FAM125A  | 0.0000 |
| FAM153A  | 0.0000 |
| FAM176A  | 0.0000 |
| FAM181A  | 0.0000 |
| FAM196A  | 0.0000 |
| FAM36A   | 0.0000 |
| FAM3C    | 0.0000 |
| FAM40A   | 0.0000 |
| FAM47C   | 0.0000 |
| FAM53B   | 0.0000 |
| FAM53C   | 0.0000 |
| FAM54A   | 0.0000 |
| FAM55C   | 0.0000 |
| FAM57B   | 0.0000 |
| FAM60A   | 0.0000 |
| FAM69A   | 0.0000 |
| FAM71C   | 0.0000 |
| FAM86A   | 0.0000 |
| FAM86C2P | 0.0000 |
| FAM98A   | 0.0000 |
| FANCD2   | 0.0000 |
| FANCE    | 0.0000 |
| FANCF    | 0.0000 |
| FAR2     | 0.0000 |
| FASTKD1  | 0.0000 |
| FASTKD2  | 0.0000 |
| FBXO17   | 0.0000 |
| FBXO18   | 0.0000 |
| FBXO28   | 0.0000 |
| FBXO33   | 0.0000 |
| FBXO4    | 0.0000 |
| FBXO44   | 0.0000 |
| FBXO5    | 0.0000 |
| FBXO8    | 0.0000 |

|          |        |
|----------|--------|
| FCAMR    | 0.0000 |
| FGF10    | 0.0000 |
| FGF14    | 0.0000 |
| FGF22    | 0.0000 |
| FGFBP2   | 0.0000 |
| FGFR1OP  | 0.0000 |
| FGFRL1   | 0.0000 |
| FGL2     | 0.0000 |
| FHDC1    | 0.0000 |
| FHOD3    | 0.0000 |
| FIBCD1   | 0.0000 |
| FIP1L1   | 0.0000 |
| FIS1     | 0.0000 |
| FKBP11   | 0.0000 |
| FKBP1B   | 0.0000 |
| FKBP2    | 0.0000 |
| FKBP4    | 0.0000 |
| FKBP8    | 0.0000 |
| FKBPL    | 0.0000 |
| FKRP     | 0.0000 |
| FLJ13744 | 0.0000 |
| FLJ14107 | 0.0000 |
| FLJ22763 | 0.0000 |
| FLJ23152 | 0.0000 |
| FLJ25758 | 0.0000 |
| FLJ31713 | 0.0000 |
| FLJ32255 | 0.0000 |
| FLJ33630 | 0.0000 |
| FLJ35424 | 0.0000 |
| FLJ37201 | 0.0000 |
| FLJ38668 | 0.0000 |
| FLJ38773 | 0.0000 |
| FLJ40288 | 0.0000 |
| FLJ40434 | 0.0000 |
| FLJ43489 | 0.0000 |
| FLJ44715 | 0.0000 |
| FLNA     | 0.0000 |
| FLYWCH1  | 0.0000 |
| FMNL2    | 0.0000 |
| FMO1     | 0.0000 |
| FNDC3B   | 0.0000 |
| FNDC7    | 0.0000 |
| FOLR2    | 0.0000 |
| FOXB1    | 0.0000 |
| FOXF1    | 0.0000 |
| FOXG1    | 0.0000 |

|           |        |
|-----------|--------|
| FOXH1     | 0.0000 |
| FOXJ2     | 0.0000 |
| FOXK1     | 0.0000 |
| FOXN1     | 0.0000 |
| FOXP2     | 0.0000 |
| FRMD3     | 0.0000 |
| FRMPD1    | 0.0000 |
| FRMPD3    | 0.0000 |
| FRS2      | 0.0000 |
| FURIN     | 0.0000 |
| FUT2      | 0.0000 |
| FUT9      | 0.0000 |
| FUZ       | 0.0000 |
| FXYP2     | 0.0000 |
| FZD5      | 0.0000 |
| FZD6      | 0.0000 |
| FZD8      | 0.0000 |
| G3BP2     | 0.0000 |
| GAB2      | 0.0000 |
| GABARAPL1 | 0.0000 |
| GABRA6    | 0.0000 |
| GABRG3    | 0.0000 |
| GALC      | 0.0000 |
| GALNT1    | 0.0000 |
| GALNT2    | 0.0000 |
| GALNTL1   | 0.0000 |
| GAMT      | 0.0000 |
| GAS7      | 0.0000 |
| GATS      | 0.0000 |
| GCDH      | 0.0000 |
| GCET2     | 0.0000 |
| GCLC      | 0.0000 |
| GDF11     | 0.0000 |
| GDF5      | 0.0000 |
| GDNF      | 0.0000 |
| GEMIN8P4  | 0.0000 |
| GFRA4     | 0.0000 |
| GGA2      | 0.0000 |
| GGNBP1    | 0.0000 |
| GGT2      | 0.0000 |
| GH2       | 0.0000 |
| GIGYF2    | 0.0000 |
| GIP       | 0.0000 |
| GIPC1     | 0.0000 |
| GIPR      | 0.0000 |
| GJA3      | 0.0000 |

|           |        |
|-----------|--------|
| GJB2      | 0.0000 |
| GLB1      | 0.0000 |
| GLCE      | 0.0000 |
| GLIS2     | 0.0000 |
| GLIS3     | 0.0000 |
| GLO1      | 0.0000 |
| GLOD5     | 0.0000 |
| GLRA2     | 0.0000 |
| GLTPD2    | 0.0000 |
| GLUD2     | 0.0000 |
| GMCL1P1   | 0.0000 |
| GMNN      | 0.0000 |
| GMPPA     | 0.0000 |
| GMPPB     | 0.0000 |
| GMPS      | 0.0000 |
| GNA12     | 0.0000 |
| GNA13     | 0.0000 |
| GNG10     | 0.0000 |
| GNG7      | 0.0000 |
| GNPDA1    | 0.0000 |
| GNPNAT1   | 0.0000 |
| GOLGA3    | 0.0000 |
| GOLGA6L10 | 0.0000 |
| GPATCH3   | 0.0000 |
| GPBP1L1   | 0.0000 |
| GPC4      | 0.0000 |
| GPC6      | 0.0000 |
| GPM6B     | 0.0000 |
| GPR101    | 0.0000 |
| GPR115    | 0.0000 |
| GPR137    | 0.0000 |
| GPR149    | 0.0000 |
| GPR158    | 0.0000 |
| GPR161    | 0.0000 |
| GPR31     | 0.0000 |
| GPR98     | 0.0000 |
| GPRIN2    | 0.0000 |
| GPX5      | 0.0000 |
| GPX6      | 0.0000 |
| GRAP      | 0.0000 |
| GRAPL     | 0.0000 |
| GRB2      | 0.0000 |
| GREB1     | 0.0000 |
| GRIK5     | 0.0000 |
| GRM5      | 0.0000 |
| GRSF1     | 0.0000 |

|           |        |
|-----------|--------|
| GSK3B     | 0.0000 |
| GTF2E1    | 0.0000 |
| GTF2E2    | 0.0000 |
| GTF2F2    | 0.0000 |
| GTF3C1    | 0.0000 |
| GTPBP1    | 0.0000 |
| GUCY1A2   | 0.0000 |
| GUCY1B3   | 0.0000 |
| GUCY2D    | 0.0000 |
| GYLTL1B   | 0.0000 |
| GZMH      | 0.0000 |
| GZMK      | 0.0000 |
| H1FNT     | 0.0000 |
| H2AFY2    | 0.0000 |
| HABP2     | 0.0000 |
| HAND1     | 0.0000 |
| HAND2     | 0.0000 |
| HAR1A     | 0.0000 |
| HBP1      | 0.0000 |
| HCAR2     | 0.0000 |
| HCG22     | 0.0000 |
| HCG26     | 0.0000 |
| HCRTR1    | 0.0000 |
| HDAC10    | 0.0000 |
| HDAC2     | 0.0000 |
| HDAC4     | 0.0000 |
| HDHD2     | 0.0000 |
| HEATR4    | 0.0000 |
| HEATR7B1  | 0.0000 |
| HEATR7B2  | 0.0000 |
| HEMGN     | 0.0000 |
| HEPACAM2  | 0.0000 |
| HERC2     | 0.0000 |
| HERC2P2   | 0.0000 |
| HEXIM1    | 0.0000 |
| HHIPL1    | 0.0000 |
| HIBADH    | 0.0000 |
| HIC1      | 0.0000 |
| HIF1AN    | 0.0000 |
| HILPDA    | 0.0000 |
| HIST1H1B  | 0.0000 |
| HIST1H2BH | 0.0000 |
| HIST1H3J  | 0.0000 |
| HIST1H4B  | 0.0000 |
| HIST1H4L  | 0.0000 |
| HIST2H2AB | 0.0000 |

|          |        |
|----------|--------|
| HMG20A   | 0.0000 |
| HMX2     | 0.0000 |
| HNRPDL   | 0.0000 |
| HNRPLL   | 0.0000 |
| HOMEZ    | 0.0000 |
| HOXA1    | 0.0000 |
| HOXD1    | 0.0000 |
| HOXD4    | 0.0000 |
| HPCAL1   | 0.0000 |
| HPS3     | 0.0000 |
| HRASLS2  | 0.0000 |
| HS3ST3B1 | 0.0000 |
| HSD17B10 | 0.0000 |
| HSD17B4  | 0.0000 |
| HSD3B1   | 0.0000 |
| HSF2BP   | 0.0000 |
| HSPB2    | 0.0000 |
| HSPBP1   | 0.0000 |
| HSPC081  | 0.0000 |
| HTATSF1  | 0.0000 |
| HYLS1    | 0.0000 |
| IARS     | 0.0000 |
| ICAM4    | 0.0000 |
| IDH3A    | 0.0000 |
| IDH3G    | 0.0000 |
| IDI2     | 0.0000 |
| IFNA21   | 0.0000 |
| IFNGR1   | 0.0000 |
| IFRD1    | 0.0000 |
| IFT140   | 0.0000 |
| IFT43    | 0.0000 |
| IGF2BP3  | 0.0000 |
| IGF2R    | 0.0000 |
| IGFL2    | 0.0000 |
| IKBKB    | 0.0000 |
| IL12RB2  | 0.0000 |
| IL13RA1  | 0.0000 |
| IL17RC   | 0.0000 |
| IL17RE   | 0.0000 |
| IL1R1    | 0.0000 |
| IL1RAPL2 | 0.0000 |
| IL1RL2   | 0.0000 |
| IL20RB   | 0.0000 |
| IL21R    | 0.0000 |
| IL23A    | 0.0000 |
| IL25     | 0.0000 |

|          |        |
|----------|--------|
| IL28A    | 0.0000 |
| IL2RB    | 0.0000 |
| IL3      | 0.0000 |
| IMMP1L   | 0.0000 |
| IMPDH2   | 0.0000 |
| INHBC    | 0.0000 |
| INPP5D   | 0.0000 |
| INSIG1   | 0.0000 |
| INSL3    | 0.0000 |
| INTS4L1  | 0.0000 |
| IPMK     | 0.0000 |
| IPP      | 0.0000 |
| IPW      | 0.0000 |
| IQCF5    | 0.0000 |
| IQGAP3   | 0.0000 |
| IREB2    | 0.0000 |
| IRF8     | 0.0000 |
| IRX3     | 0.0000 |
| ISCA1    | 0.0000 |
| IST1     | 0.0000 |
| ITGA7    | 0.0000 |
| ITGB1    | 0.0000 |
| ITPRIPL2 | 0.0000 |
| JAK3     | 0.0000 |
| JRKL     | 0.0000 |
| JUNB     | 0.0000 |
| KARS     | 0.0000 |
| KAT8     | 0.0000 |
| KBTBD12  | 0.0000 |
| KBTBD4   | 0.0000 |
| KBTBD7   | 0.0000 |
| KCNA4    | 0.0000 |
| KCNAB2   | 0.0000 |
| KCNE3    | 0.0000 |
| KCNG3    | 0.0000 |
| KCNK15   | 0.0000 |
| KCNQ3    | 0.0000 |
| KCNQ4    | 0.0000 |
| KCNQ5    | 0.0000 |
| KCTD2    | 0.0000 |
| KCTD20   | 0.0000 |
| KCTD21   | 0.0000 |
| KCTD4    | 0.0000 |
| KCTD8    | 0.0000 |
| KDELR2   | 0.0000 |
| KDM1B    | 0.0000 |

|          |        |
|----------|--------|
| KDM3A    | 0.0000 |
| KEL      | 0.0000 |
| KGFLP2   | 0.0000 |
| KHDRBS3  | 0.0000 |
| KIAA0020 | 0.0000 |
| KIAA0101 | 0.0000 |
| KIAA0513 | 0.0000 |
| KIAA0586 | 0.0000 |
| KIAA0825 | 0.0000 |
| KIAA0947 | 0.0000 |
| KIAA1033 | 0.0000 |
| KIAA1147 | 0.0000 |
| KIAA1257 | 0.0000 |
| KIAA1430 | 0.0000 |
| KIAA1467 | 0.0000 |
| KIAA1539 | 0.0000 |
| KIAA1614 | 0.0000 |
| KIAA1704 | 0.0000 |
| KIAA1841 | 0.0000 |
| KIAA1875 | 0.0000 |
| KIF14    | 0.0000 |
| KIF2A    | 0.0000 |
| KIF3A    | 0.0000 |
| KIF3B    | 0.0000 |
| KIF5B    | 0.0000 |
| KIR2DL4  | 0.0000 |
| KLHDC3   | 0.0000 |
| KLHDC7A  | 0.0000 |
| KLHL2    | 0.0000 |
| KLHL20   | 0.0000 |
| KLHL23   | 0.0000 |
| KLHL24   | 0.0000 |
| KLHL29   | 0.0000 |
| KLK11    | 0.0000 |
| KLK14    | 0.0000 |
| KLRB1    | 0.0000 |
| KLRC4    | 0.0000 |
| KLRG1    | 0.0000 |
| KNTC1    | 0.0000 |
| KPNA5    | 0.0000 |
| KRBOX1   | 0.0000 |
| KREMEN1  | 0.0000 |
| KRI1     | 0.0000 |
| KRT24    | 0.0000 |
| KRT27    | 0.0000 |
| KRT33A   | 0.0000 |



|           |        |
|-----------|--------|
| KRT72     | 0.0000 |
| KRT74     | 0.0000 |
| KRT75     | 0.0000 |
| KRT76     | 0.0000 |
| KRT77     | 0.0000 |
| KRT78     | 0.0000 |
| KRT9      | 0.0000 |
| KRTAP1-3  | 0.0000 |
| KRTAP2-1  | 0.0000 |
| KRTAP4-12 | 0.0000 |
| KRTAP4-3  | 0.0000 |
| LACTB     | 0.0000 |
| LAD1      | 0.0000 |
| LAMA4     | 0.0000 |
| LAMC3     | 0.0000 |
| LAMP1     | 0.0000 |
| LAMTOR3   | 0.0000 |
| LATS1     | 0.0000 |
| LCMT1     | 0.0000 |
| LCN12     | 0.0000 |
| LCOR      | 0.0000 |
| LDHAL6A   | 0.0000 |
| LDHAL6B   | 0.0000 |
| LDHD      | 0.0000 |
| LDOC1     | 0.0000 |
| LEFTY1    | 0.0000 |
| LGALS16   | 0.0000 |
| LGALS4    | 0.0000 |
| LHFPL5    | 0.0000 |
| LHX3      | 0.0000 |
| LIG4      | 0.0000 |
| LILRB3    | 0.0000 |
| LILRB4    | 0.0000 |
| LIN7B     | 0.0000 |
| LIN7C     | 0.0000 |
| LINC00094 | 0.0000 |
| LINC00167 | 0.0000 |
| LINC00239 | 0.0000 |
| LINC00263 | 0.0000 |
| LINC00341 | 0.0000 |
| LINC00471 | 0.0000 |
| LINC00473 | 0.0000 |
| LINC00479 | 0.0000 |
| LINC00491 | 0.0000 |
| LINGO2    | 0.0000 |
| LIX1L     | 0.0000 |

|              |        |
|--------------|--------|
| LMAN2        | 0.0000 |
| LMAN2L       | 0.0000 |
| LMBR1        | 0.0000 |
| LOC100128164 | 0.0000 |
| LOC100128185 | 0.0000 |
| LOC100128219 | 0.0000 |
| LOC100128511 | 0.0000 |
| LOC100128644 | 0.0000 |
| LOC100128822 | 0.0000 |
| LOC100129033 | 0.0000 |
| LOC100129113 | 0.0000 |
| LOC100129292 | 0.0000 |
| LOC100129449 | 0.0000 |
| LOC100129794 | 0.0000 |
| LOC100130776 | 0.0000 |
| LOC100130811 | 0.0000 |
| LOC100130916 | 0.0000 |
| LOC100130920 | 0.0000 |
| LOC100131067 | 0.0000 |
| LOC100131131 | 0.0000 |
| LOC100131756 | 0.0000 |
| LOC100131840 | 0.0000 |
| LOC100131864 | 0.0000 |
| LOC100131943 | 0.0000 |
| LOC100132234 | 0.0000 |
| LOC100133331 | 0.0000 |
| LOC100192204 | 0.0000 |
| LOC100287852 | 0.0000 |
| LOC100288069 | 0.0000 |
| LOC100288798 | 0.0000 |
| LOC100289045 | 0.0000 |
| LOC100291666 | 0.0000 |
| LOC100505820 | 0.0000 |
| LOC100506059 | 0.0000 |
| LOC100506075 | 0.0000 |
| LOC100506105 | 0.0000 |
| LOC100506242 | 0.0000 |
| LOC100506247 | 0.0000 |
| LOC100506388 | 0.0000 |
| LOC100506392 | 0.0000 |
| LOC100506418 | 0.0000 |
| LOC100506439 | 0.0000 |
| LOC100506533 | 0.0000 |
| LOC100506674 | 0.0000 |
| LOC100506681 | 0.0000 |
| LOC100507055 | 0.0000 |

|              |        |
|--------------|--------|
| LOC100507056 | 0.0000 |
| LOC100507203 | 0.0000 |
| LOC100507212 | 0.0000 |
| LOC100507218 | 0.0000 |
| LOC100507222 | 0.0000 |
| LOC100507246 | 0.0000 |
| LOC100507309 | 0.0000 |
| LOC100507311 | 0.0000 |
| LOC100507316 | 0.0000 |
| LOC100507390 | 0.0000 |
| LOC100507392 | 0.0000 |
| LOC100507632 | 0.0000 |
| LOC100507663 | 0.0000 |
| LOC100616668 | 0.0000 |
| LOC100652913 | 0.0000 |
| LOC100652953 | 0.0000 |
| LOC100652974 | 0.0000 |
| LOC149703    | 0.0000 |
| LOC158435    | 0.0000 |
| LOC200726    | 0.0000 |
| LOC202181    | 0.0000 |
| LOC284072    | 0.0000 |
| LOC284933    | 0.0000 |
| LOC285441    | 0.0000 |
| LOC286002    | 0.0000 |
| LOC286359    | 0.0000 |
| LOC339260    | 0.0000 |
| LOC343052    | 0.0000 |
| LOC392288    | 0.0000 |
| LOC399815    | 0.0000 |
| LOC400027    | 0.0000 |
| LOC439949    | 0.0000 |
| LOC439990    | 0.0000 |
| LOC441455    | 0.0000 |
| LOC541472    | 0.0000 |
| LOC643454    | 0.0000 |
| LOC643650    | 0.0000 |
| LOC646513    | 0.0000 |
| LOC646719    | 0.0000 |
| LOC647979    | 0.0000 |
| LOC653581    | 0.0000 |
| LOC723809    | 0.0000 |
| LOC728034    | 0.0000 |
| LOC728640    | 0.0000 |
| LOC728769    | 0.0000 |
| LOC729088    | 0.0000 |

|          |        |
|----------|--------|
| LOC84989 | 0.0000 |
| LPAR4    | 0.0000 |
| LPIN3    | 0.0000 |
| LRCH1    | 0.0000 |
| LRIG2    | 0.0000 |
| LRP1     | 0.0000 |
| LRP4     | 0.0000 |
| LRRC31   | 0.0000 |
| LRRC38   | 0.0000 |
| LRRC71   | 0.0000 |
| LRRC1    | 0.0000 |
| LRRK1    | 0.0000 |
| LRRN1    | 0.0000 |
| LSM5     | 0.0000 |
| LSR      | 0.0000 |
| LTA      | 0.0000 |
| LTB4R    | 0.0000 |
| LTN1     | 0.0000 |
| LUM      | 0.0000 |
| LY6K     | 0.0000 |
| LYNX1    | 0.0000 |
| LYRM1    | 0.0000 |
| LYZL1    | 0.0000 |
| LZTR1    | 0.0000 |
| MADCAM1  | 0.0000 |
| MAFIP    | 0.0000 |
| MAFK     | 0.0000 |
| MAGEA6   | 0.0000 |
| MAK16    | 0.0000 |
| MAN2B2   | 0.0000 |
| MANSC1   | 0.0000 |
| MAP1LC3C | 0.0000 |
| MAP2K2   | 0.0000 |
| MAP3K14  | 0.0000 |
| MAP3K4   | 0.0000 |
| MAP3K7   | 0.0000 |
| MAPK15   | 0.0000 |
| MAPK4    | 0.0000 |
| MAPK6    | 0.0000 |
| MAPK8IP1 | 0.0000 |
| MAPKAPK2 | 0.0000 |
| MAPKAPK3 | 0.0000 |
| MAPKBP1  | 0.0000 |
| 1-Mar    | 0.0000 |
| 11-Mar   | 0.0000 |
| 7-Mar    | 0.0000 |

|           |        |
|-----------|--------|
| 9-Mar     | 0.0000 |
| MAST3     | 0.0000 |
| MAX       | 0.0000 |
| MBD4      | 0.0000 |
| MBL1P     | 0.0000 |
| MBL2      | 0.0000 |
| MBTPS1    | 0.0000 |
| MC2R      | 0.0000 |
| MCAM      | 0.0000 |
| MCART1    | 0.0000 |
| MCAT      | 0.0000 |
| MCCC1     | 0.0000 |
| MCCD1     | 0.0000 |
| MCM5      | 0.0000 |
| MCM9      | 0.0000 |
| MDN1      | 0.0000 |
| MED13     | 0.0000 |
| MED25     | 0.0000 |
| MEF2D     | 0.0000 |
| MEOX1     | 0.0000 |
| MESTIT1   | 0.0000 |
| METAP2    | 0.0000 |
| METTTL21D | 0.0000 |
| METTTL22  | 0.0000 |
| METTTL3   | 0.0000 |
| MEX3B     | 0.0000 |
| MFF       | 0.0000 |
| MFSD2A    | 0.0000 |
| MGAT1     | 0.0000 |
| MGC11082  | 0.0000 |
| MGC12982  | 0.0000 |
| MGC16275  | 0.0000 |
| MGC3771   | 0.0000 |
| MGC4473   | 0.0000 |
| MGC70870  | 0.0000 |
| MIA2      | 0.0000 |
| MIAT      | 0.0000 |
| MINA      | 0.0000 |
| MINOS1    | 0.0000 |
| MINPP1    | 0.0000 |
| MIR497HG  | 0.0000 |
| MIR600HG  | 0.0000 |
| MITD1     | 0.0000 |
| MKLN1     | 0.0000 |
| MKS1      | 0.0000 |
| MLH1      | 0.0000 |

|          |        |
|----------|--------|
| MLL      | 0.0000 |
| MLL4     | 0.0000 |
| MLYCD    | 0.0000 |
| MME      | 0.0000 |
| MMP28    | 0.0000 |
| MOB1B    | 0.0000 |
| MOGAT2   | 0.0000 |
| MON1A    | 0.0000 |
| MOP-1    | 0.0000 |
| MORC1    | 0.0000 |
| MORC4    | 0.0000 |
| MORF4L2  | 0.0000 |
| MPDU1    | 0.0000 |
| MPP5     | 0.0000 |
| MPV17L   | 0.0000 |
| MPZL2    | 0.0000 |
| MRE11A   | 0.0000 |
| MRFAP1L1 | 0.0000 |
| MRGPRE   | 0.0000 |
| MRPL11   | 0.0000 |
| MRPL2    | 0.0000 |
| MRPL24   | 0.0000 |
| MRPL32   | 0.0000 |
| MRPL38   | 0.0000 |
| MRPL41   | 0.0000 |
| MRPL54   | 0.0000 |
| MRPL9    | 0.0000 |
| MRPS5    | 0.0000 |
| MRTO4    | 0.0000 |
| MS4A3    | 0.0000 |
| MSI1     | 0.0000 |
| MSL1     | 0.0000 |
| MSMO1    | 0.0000 |
| MTAP     | 0.0000 |
| MTCP1NB  | 0.0000 |
| MTHFD1   | 0.0000 |
| MTMR1    | 0.0000 |
| MTMR3    | 0.0000 |
| MTR      | 0.0000 |
| MTRF1    | 0.0000 |
| MTSS1L   | 0.0000 |
| MUC12    | 0.0000 |
| MUC5AC   | 0.0000 |
| MUDENG   | 0.0000 |
| MUL1     | 0.0000 |
| MYADML   | 0.0000 |

|         |        |
|---------|--------|
| MYBL1   | 0.0000 |
| MYBPC2  | 0.0000 |
| MYEOV   | 0.0000 |
| MYH10   | 0.0000 |
| MYH4    | 0.0000 |
| MYL7    | 0.0000 |
| MYO1G   | 0.0000 |
| MYOD1   | 0.0000 |
| MYOF    | 0.0000 |
| MYOG    | 0.0000 |
| MYOZ3   | 0.0000 |
| MYSM1   | 0.0000 |
| N4BP2   | 0.0000 |
| NAA20   | 0.0000 |
| NAA35   | 0.0000 |
| NAA40   | 0.0000 |
| NAAA    | 0.0000 |
| NAGA    | 0.0000 |
| NALCN   | 0.0000 |
| NAP1L1  | 0.0000 |
| NAPEPLD | 0.0000 |
| NARFL   | 0.0000 |
| NAT8B   | 0.0000 |
| NBEAL2  | 0.0000 |
| NCALD   | 0.0000 |
| NCLN    | 0.0000 |
| NDEL1   | 0.0000 |
| NDNL2   | 0.0000 |
| NDOR1   | 0.0000 |
| NDUFA1  | 0.0000 |
| NDUFA10 | 0.0000 |
| NDUFAB2 | 0.0000 |
| NDUFB7  | 0.0000 |
| NEAT1   | 0.0000 |
| NEK7    | 0.0000 |
| NELF    | 0.0000 |
| NEUROD2 | 0.0000 |
| NEUROG2 | 0.0000 |
| NFATC3  | 0.0000 |
| NFATC4  | 0.0000 |
| NFE2L2  | 0.0000 |
| NFIA    | 0.0000 |
| NFRKB   | 0.0000 |
| NFU1    | 0.0000 |
| NFYA    | 0.0000 |
| NIF3L1  | 0.0000 |

|          |        |
|----------|--------|
| NIN      | 0.0000 |
| NIP7     | 0.0000 |
| NKAPP1   | 0.0000 |
| NKIRAS2  | 0.0000 |
| NKRF     | 0.0000 |
| NKX2-3   | 0.0000 |
| NKX2-5   | 0.0000 |
| NKX6-3   | 0.0000 |
| NLK      | 0.0000 |
| NMD3     | 0.0000 |
| NME1     | 0.0000 |
| NMT1     | 0.0000 |
| NOB1     | 0.0000 |
| NOD1     | 0.0000 |
| NOL11    | 0.0000 |
| NOLC1    | 0.0000 |
| NOM1     | 0.0000 |
| NOP2     | 0.0000 |
| NOTUM    | 0.0000 |
| NPAS3    | 0.0000 |
| NPBWR2   | 0.0000 |
| NPDC1    | 0.0000 |
| NRBF2    | 0.0000 |
| NRM      | 0.0000 |
| NRSN2    | 0.0000 |
| NSDHL    | 0.0000 |
| NSFL1C   | 0.0000 |
| NSMAF    | 0.0000 |
| NTAN1    | 0.0000 |
| NTF3     | 0.0000 |
| NTM      | 0.0000 |
| NTRK3    | 0.0000 |
| NUCKS1   | 0.0000 |
| NUDT16L1 | 0.0000 |
| NUDT9    | 0.0000 |
| NUMB     | 0.0000 |
| NUMBL    | 0.0000 |
| NUP210   | 0.0000 |
| NUP210P1 | 0.0000 |
| NUP35    | 0.0000 |
| NUP37    | 0.0000 |
| NUP88    | 0.0000 |
| NUPL2    | 0.0000 |
| NUS1     | 0.0000 |
| NXPH1    | 0.0000 |
| NXPH3    | 0.0000 |



|             |        |
|-------------|--------|
| NYX         | 0.0000 |
| OCIAD2      | 0.0000 |
| ODF1        | 0.0000 |
| OGG1        | 0.0000 |
| OIP5-AS1    | 0.0000 |
| OLA1        | 0.0000 |
| OPALIN      | 0.0000 |
| OPN1MW      | 0.0000 |
| OPRD1       | 0.0000 |
| OPRK1       | 0.0000 |
| OR11A1      | 0.0000 |
| OR2V2       | 0.0000 |
| OR4F4       | 0.0000 |
| OR51E1      | 0.0000 |
| OR5I1       | 0.0000 |
| OR5L2       | 0.0000 |
| OR5V1       | 0.0000 |
| OR6W1P      | 0.0000 |
| OR7E24      | 0.0000 |
| OR8D2       | 0.0000 |
| OR8G1       | 0.0000 |
| OR8H1       | 0.0000 |
| ORC4        | 0.0000 |
| OTOS        | 0.0000 |
| OTUD6B      | 0.0000 |
| OXT         | 0.0000 |
| OXTR        | 0.0000 |
| P2RX2       | 0.0000 |
| P4HA1       | 0.0000 |
| P4HTM       | 0.0000 |
| PACRGL      | 0.0000 |
| PACSIN3     | 0.0000 |
| PADI2       | 0.0000 |
| PAG1        | 0.0000 |
| PAIP2       | 0.0000 |
| PAK7        | 0.0000 |
| PALM2-AKAP2 | 0.0000 |
| PAOX        | 0.0000 |
| PAPD4       | 0.0000 |
| PAPD5       | 0.0000 |
| PAPL        | 0.0000 |
| PAPOLA      | 0.0000 |
| PAPPA2      | 0.0000 |
| PAQR3       | 0.0000 |
| PARD6B      | 0.0000 |
| PARVG       | 0.0000 |

|          |        |
|----------|--------|
| PASD1    | 0.0000 |
| PAX4     | 0.0000 |
| PAX5     | 0.0000 |
| PCDH11X  | 0.0000 |
| PCDH20   | 0.0000 |
| PCDHA1   | 0.0000 |
| PCDHB13  | 0.0000 |
| PCDHB16  | 0.0000 |
| PCDHB17  | 0.0000 |
| PCDHB4   | 0.0000 |
| PCDHB5   | 0.0000 |
| PCDHGA12 | 0.0000 |
| PCDHGA7  | 0.0000 |
| PCDHGB1  | 0.0000 |
| PCDHGB6  | 0.0000 |
| PCDHGC5  | 0.0000 |
| PCMTD1   | 0.0000 |
| PCNP     | 0.0000 |
| PCNXL3   | 0.0000 |
| PCSK1N   | 0.0000 |
| PDCD10   | 0.0000 |
| PDE8A    | 0.0000 |
| PDIA6    | 0.0000 |
| PDILT    | 0.0000 |
| PDK4     | 0.0000 |
| PDLIM4   | 0.0000 |
| PDSS2    | 0.0000 |
| PDXDC1   | 0.0000 |
| PDZD9    | 0.0000 |
| PDZRN4   | 0.0000 |
| PEA15    | 0.0000 |
| PELO     | 0.0000 |
| PER2     | 0.0000 |
| PES1     | 0.0000 |
| PEX1     | 0.0000 |
| PEX2     | 0.0000 |
| PEX3     | 0.0000 |
| PFAS     | 0.0000 |
| PFKFB2   | 0.0000 |
| PFKFB3   | 0.0000 |
| PGA3     | 0.0000 |
| PGBD1    | 0.0000 |
| PGLS     | 0.0000 |
| PGM2     | 0.0000 |
| PGM2L1   | 0.0000 |
| PHAX     | 0.0000 |

|          |        |
|----------|--------|
| PHF1     | 0.0000 |
| PHF3     | 0.0000 |
| PHF6     | 0.0000 |
| PHOSPHO2 | 0.0000 |
| PIAS4    | 0.0000 |
| PIGH     | 0.0000 |
| PIGL     | 0.0000 |
| PIGU     | 0.0000 |
| PIGY     | 0.0000 |
| PIH1D2   | 0.0000 |
| PIK3C2A  | 0.0000 |
| PIK3C2B  | 0.0000 |
| PIK3C2G  | 0.0000 |
| PIM1     | 0.0000 |
| PITHD1   | 0.0000 |
| PIWIL1   | 0.0000 |
| PIWIL3   | 0.0000 |
| PKD1     | 0.0000 |
| PKP2     | 0.0000 |
| PLA2G10  | 0.0000 |
| PLA2G1B  | 0.0000 |
| PLA2G2A  | 0.0000 |
| PLA2G4F  | 0.0000 |
| PLCB3    | 0.0000 |
| PLCG1    | 0.0000 |
| PLCL1    | 0.0000 |
| PLCXD2   | 0.0000 |
| PLCXD3   | 0.0000 |
| PLEKHB2  | 0.0000 |
| PLEKHN1  | 0.0000 |
| PLIN3    | 0.0000 |
| PLLP     | 0.0000 |
| PLTP     | 0.0000 |
| PLXND1   | 0.0000 |
| PMEL     | 0.0000 |
| PMM1     | 0.0000 |
| PMPCB    | 0.0000 |
| PMS2P5   | 0.0000 |
| PNKD     | 0.0000 |
| PNPT1    | 0.0000 |
| PNRC2    | 0.0000 |
| POLD1    | 0.0000 |
| POLG2    | 0.0000 |
| POLI     | 0.0000 |
| POLR1A   | 0.0000 |
| POLR2G   | 0.0000 |

|            |        |
|------------|--------|
| POLR2K     | 0.0000 |
| POLR3B     | 0.0000 |
| POLR3H     | 0.0000 |
| POM121L10P | 0.0000 |
| POMT1      | 0.0000 |
| PON3       | 0.0000 |
| POTEF      | 0.0000 |
| POTEKP     | 0.0000 |
| POU2AF1    | 0.0000 |
| POU5F2     | 0.0000 |
| PPA2       | 0.0000 |
| PPARD      | 0.0000 |
| PPCDC      | 0.0000 |
| PPEF2      | 0.0000 |
| PPFIA1     | 0.0000 |
| PPHLN1     | 0.0000 |
| PPID       | 0.0000 |
| PPIE       | 0.0000 |
| PPIH       | 0.0000 |
| PPIL1      | 0.0000 |
| PPP1R15A   | 0.0000 |
| PPP1R21    | 0.0000 |
| PPP2R2A    | 0.0000 |
| PPP2R5B    | 0.0000 |
| PPP2R5D    | 0.0000 |
| PPP4C      | 0.0000 |
| PPP6R2     | 0.0000 |
| PPYR1      | 0.0000 |
| PRADC1     | 0.0000 |
| PRAMEF2    | 0.0000 |
| PRDM12     | 0.0000 |
| PRKAB1     | 0.0000 |
| PRKCD      | 0.0000 |
| PRKCH      | 0.0000 |
| PRKCSH     | 0.0000 |
| PRKRIR     | 0.0000 |
| PRMT7      | 0.0000 |
| PRO1483    | 0.0000 |
| PROCR      | 0.0000 |
| PRODH      | 0.0000 |
| PROX2      | 0.0000 |
| PRPF40B    | 0.0000 |
| PRPF6      | 0.0000 |
| PRPH       | 0.0000 |
| PRRC1      | 0.0000 |
| PRRT1      | 0.0000 |

|           |        |
|-----------|--------|
| PRSS1     | 0.0000 |
| PRSS23    | 0.0000 |
| PRSS3     | 0.0000 |
| PRTFDC1   | 0.0000 |
| PRY2      | 0.0000 |
| PSMA7     | 0.0000 |
| PSMB1     | 0.0000 |
| PSMB3     | 0.0000 |
| PSMC2     | 0.0000 |
| PSMC4     | 0.0000 |
| PSMC6     | 0.0000 |
| PSMD10    | 0.0000 |
| PSMG1     | 0.0000 |
| PSORS1C2  | 0.0000 |
| PSPN      | 0.0000 |
| PTCD2     | 0.0000 |
| PTEN      | 0.0000 |
| PTGES3    | 0.0000 |
| PTK2B     | 0.0000 |
| PTOV1     | 0.0000 |
| PTPN2     | 0.0000 |
| PTPN22    | 0.0000 |
| PTPRK     | 0.0000 |
| PUS1      | 0.0000 |
| PXMP2     | 0.0000 |
| PXMP4     | 0.0000 |
| PYGL      | 0.0000 |
| PYROXD1   | 0.0000 |
| PYY2      | 0.0000 |
| PZP       | 0.0000 |
| R3HCC1    | 0.0000 |
| RAB11A    | 0.0000 |
| RAB11FIP1 | 0.0000 |
| RAB1B     | 0.0000 |
| RAB20     | 0.0000 |
| RAB22A    | 0.0000 |
| RAB30     | 0.0000 |
| RAB33B    | 0.0000 |
| RAB3GAP1  | 0.0000 |
| RAB4B     | 0.0000 |
| RAB5A     | 0.0000 |
| RAB8B     | 0.0000 |
| RABEP1    | 0.0000 |
| RABEP2    | 0.0000 |
| RAD18     | 0.0000 |
| RAMP2     | 0.0000 |

|         |        |
|---------|--------|
| RAP1A   | 0.0000 |
| RAPH1   | 0.0000 |
| RASGRP3 | 0.0000 |
| RASSF6  | 0.0000 |
| RAX2    | 0.0000 |
| RBBP5   | 0.0000 |
| RBM15   | 0.0000 |
| RBM17   | 0.0000 |
| RBMY2EP | 0.0000 |
| RBP2    | 0.0000 |
| RBPM52  | 0.0000 |
| RDH14   | 0.0000 |
| RDY     | 0.0000 |
| REEP1   | 0.0000 |
| REEP6   | 0.0000 |
| RERE    | 0.0000 |
| RFC2    | 0.0000 |
| RFPL3   | 0.0000 |
| RFPL4B  | 0.0000 |
| RFX3    | 0.0000 |
| RFXAP   | 0.0000 |
| RG9MTD2 | 0.0000 |
| RGS11   | 0.0000 |
| RHD     | 0.0000 |
| RHEBL1  | 0.0000 |
| RHO     | 0.0000 |
| RHOBTB1 | 0.0000 |
| RHOH    | 0.0000 |
| RHOT2   | 0.0000 |
| RHOV    | 0.0000 |
| RIMBP2  | 0.0000 |
| RMND5A  | 0.0000 |
| RNASE6  | 0.0000 |
| RND2    | 0.0000 |
| RND3    | 0.0000 |
| RNF138  | 0.0000 |
| RNF144A | 0.0000 |
| RNF168  | 0.0000 |
| RNF2    | 0.0000 |
| RNF20   | 0.0000 |
| RNF207  | 0.0000 |
| RNF219  | 0.0000 |
| RNF34   | 0.0000 |
| RNFT2   | 0.0000 |
| RNMTL1  | 0.0000 |
| ROBO3   | 0.0000 |

|         |        |
|---------|--------|
| ROCK1   | 0.0000 |
| RORA    | 0.0000 |
| RPL21   | 0.0000 |
| RPL23   | 0.0000 |
| RPL29P2 | 0.0000 |
| RPP30   | 0.0000 |
| RPS6KA1 | 0.0000 |
| RPS6KA3 | 0.0000 |
| RPS7P5  | 0.0000 |
| RPSA    | 0.0000 |
| RPUSD1  | 0.0000 |
| RPUSD2  | 0.0000 |
| RRAGD   | 0.0000 |
| RRM2    | 0.0000 |
| RRP12   | 0.0000 |
| RRP36   | 0.0000 |
| RSPO2   | 0.0000 |
| RTCD1   | 0.0000 |
| RTDR1   | 0.0000 |
| RTP3    | 0.0000 |
| RUSC2   | 0.0000 |
| RUVBL2  | 0.0000 |
| RYK     | 0.0000 |
| S100G   | 0.0000 |
| SAC3D1  | 0.0000 |
| SACS    | 0.0000 |
| SALL3   | 0.0000 |
| SAMD10  | 0.0000 |
| SART1   | 0.0000 |
| SBK1    | 0.0000 |
| SCAMP3  | 0.0000 |
| SCAMP4  | 0.0000 |
| SCGB2A2 | 0.0000 |
| SCN10A  | 0.0000 |
| SCN1B   | 0.0000 |
| SCN9A   | 0.0000 |
| SCNN1A  | 0.0000 |
| SCPEP1  | 0.0000 |
| SCUBE2  | 0.0000 |
| SDF2    | 0.0000 |
| SDF4    | 0.0000 |
| SDHD    | 0.0000 |
| SDSL    | 0.0000 |
| SEC14L2 | 0.0000 |
| SEC16B  | 0.0000 |
| SEC23A  | 0.0000 |

|           |        |
|-----------|--------|
| SEC23B    | 0.0000 |
| SEC23IP   | 0.0000 |
| SEC24B    | 0.0000 |
| SEC61G    | 0.0000 |
| SECISBP2L | 0.0000 |
| SEL1L     | 0.0000 |
| SELPLG    | 0.0000 |
| SEMA4F    | 0.0000 |
| SEMA6C    | 0.0000 |
| SEMG2     | 0.0000 |
| SENP5     | 0.0000 |
| SEPHS2    | 0.0000 |
| 6-Sep     | 0.0000 |
| SERPINA5  | 0.0000 |
| SERPINA6  | 0.0000 |
| SERPINE3  | 0.0000 |
| SESN3     | 0.0000 |
| SET       | 0.0000 |
| SETBP1    | 0.0000 |
| SETD1A    | 0.0000 |
| SETDB2    | 0.0000 |
| SEZ6      | 0.0000 |
| SEZ6L2    | 0.0000 |
| SF3A1     | 0.0000 |
| SF3B2     | 0.0000 |
| SFRP1     | 0.0000 |
| SFT2D1    | 0.0000 |
| SFTA3     | 0.0000 |
| SFTPC     | 0.0000 |
| SFXN3     | 0.0000 |
| SFXN4     | 0.0000 |
| SGSM3     | 0.0000 |
| SH2B2     | 0.0000 |
| SH3BGRL2  | 0.0000 |
| SH3BP2    | 0.0000 |
| SH3D19    | 0.0000 |
| SH3GL1    | 0.0000 |
| SH3GL2    | 0.0000 |
| SHC4      | 0.0000 |
| SHISA3    | 0.0000 |
| SHQ1      | 0.0000 |
| SHROOM3   | 0.0000 |
| SIGIRR    | 0.0000 |
| SIGLEC10  | 0.0000 |
| SIL1      | 0.0000 |
| SIM2      | 0.0000 |



|            |        |
|------------|--------|
| SKA2       | 0.0000 |
| SKIL       | 0.0000 |
| SLA2       | 0.0000 |
| SLAIN2     | 0.0000 |
| SLAMF1     | 0.0000 |
| SLC12A1    | 0.0000 |
| SLC12A2    | 0.0000 |
| SLC12A6    | 0.0000 |
| SLC16A1    | 0.0000 |
| SLC16A11   | 0.0000 |
| SLC16A13   | 0.0000 |
| SLC16A7    | 0.0000 |
| SLC22A12   | 0.0000 |
| SLC22A18AS | 0.0000 |
| SLC22A23   | 0.0000 |
| SLC22A25   | 0.0000 |
| SLC23A1    | 0.0000 |
| SLC25A14   | 0.0000 |
| SLC25A16   | 0.0000 |
| SLC25A18   | 0.0000 |
| SLC25A22   | 0.0000 |
| SLC25A31   | 0.0000 |
| SLC25A4    | 0.0000 |
| SLC25A40   | 0.0000 |
| SLC25A47   | 0.0000 |
| SLC26A3    | 0.0000 |
| SLC28A2    | 0.0000 |
| SLC30A6    | 0.0000 |
| SLC35C2    | 0.0000 |
| SLC35G5    | 0.0000 |
| SLC36A1    | 0.0000 |
| SLC37A1    | 0.0000 |
| SLC38A10   | 0.0000 |
| SLC39A10   | 0.0000 |
| SLC39A8    | 0.0000 |
| SLC46A3    | 0.0000 |
| SLC48A1    | 0.0000 |
| SLC5A2     | 0.0000 |
| SLC5A6     | 0.0000 |
| SLC6A8     | 0.0000 |
| SLC7A13    | 0.0000 |
| SLCO1B1    | 0.0000 |
| SLIT2      | 0.0000 |
| SLIT3      | 0.0000 |
| SLN        | 0.0000 |
| SMARCAD1   | 0.0000 |

|         |        |
|---------|--------|
| SMC2    | 0.0000 |
| SMCR5   | 0.0000 |
| SMEK2   | 0.0000 |
| SMPD1   | 0.0000 |
| SMPD4   | 0.0000 |
| SMPDL3B | 0.0000 |
| SMURF1  | 0.0000 |
| SMYD1   | 0.0000 |
| SNAI2   | 0.0000 |
| SNAPC1  | 0.0000 |
| SNAPIN  | 0.0000 |
| SNED1   | 0.0000 |
| SNORA70 | 0.0000 |
| SNRNP40 | 0.0000 |
| SNRPB2  | 0.0000 |
| SNRPD2  | 0.0000 |
| SNX11   | 0.0000 |
| SNX12   | 0.0000 |
| SNX14   | 0.0000 |
| SNX21   | 0.0000 |
| SNX27   | 0.0000 |
| SNX31   | 0.0000 |
| SNX4    | 0.0000 |
| SOCS2   | 0.0000 |
| SOHLH1  | 0.0000 |
| SORT1   | 0.0000 |
| SOX14   | 0.0000 |
| SOX21   | 0.0000 |
| SP1     | 0.0000 |
| SPAG9   | 0.0000 |
| SPAST   | 0.0000 |
| SPATA20 | 0.0000 |
| SPATA22 | 0.0000 |
| SPATS1  | 0.0000 |
| SPDYE2  | 0.0000 |
| SPDYE5  | 0.0000 |
| SPEM1   | 0.0000 |
| SPINK13 | 0.0000 |
| SPN     | 0.0000 |
| SPNS1   | 0.0000 |
| SPO11   | 0.0000 |
| SPOCK1  | 0.0000 |
| SPON1   | 0.0000 |
| SPRR2E  | 0.0000 |
| SPRYD5  | 0.0000 |
| SPSB4   | 0.0000 |

|            |        |
|------------|--------|
| SPTA1      | 0.0000 |
| SPTBN4     | 0.0000 |
| SPTLC2     | 0.0000 |
| SRC        | 0.0000 |
| SRD5A1     | 0.0000 |
| SREBF2     | 0.0000 |
| SRP54      | 0.0000 |
| SRSF6      | 0.0000 |
| SRY        | 0.0000 |
| SS18       | 0.0000 |
| SSC5D      | 0.0000 |
| SSH1       | 0.0000 |
| SSR4P1     | 0.0000 |
| SSRP1      | 0.0000 |
| ST6GALNAC6 | 0.0000 |
| ST8SIA1    | 0.0000 |
| ST8SIA2    | 0.0000 |
| STAC       | 0.0000 |
| STAG1      | 0.0000 |
| STAG3L2    | 0.0000 |
| STAG3L4    | 0.0000 |
| STAM2      | 0.0000 |
| STAMBPL1   | 0.0000 |
| STARD3NL   | 0.0000 |
| STARD6     | 0.0000 |
| STIM2      | 0.0000 |
| STK11      | 0.0000 |
| STK25      | 0.0000 |
| STK38      | 0.0000 |
| STMN2      | 0.0000 |
| STRN4      | 0.0000 |
| STX10      | 0.0000 |
| STX16      | 0.0000 |
| STYX       | 0.0000 |
| SUCLA2     | 0.0000 |
| SULF1      | 0.0000 |
| SULT2A1    | 0.0000 |
| SUMF1      | 0.0000 |
| SUN1       | 0.0000 |
| SUN5       | 0.0000 |
| SUPT3H     | 0.0000 |
| SUSD5      | 0.0000 |
| SV2A       | 0.0000 |
| SVIP       | 0.0000 |
| SYCP1      | 0.0000 |
| SYDE1      | 0.0000 |

|          |        |
|----------|--------|
| SYNCRIP  | 0.0000 |
| SYNGR4   | 0.0000 |
| SYPL1    | 0.0000 |
| SYT2     | 0.0000 |
| SYT4     | 0.0000 |
| SYT9     | 0.0000 |
| TAAR8    | 0.0000 |
| TACR2    | 0.0000 |
| TACSTD2  | 0.0000 |
| TAF13    | 0.0000 |
| TAF3     | 0.0000 |
| TAF4B    | 0.0000 |
| TAF7L    | 0.0000 |
| TARBP2   | 0.0000 |
| TAS2R41  | 0.0000 |
| TBC1D13  | 0.0000 |
| TBC1D22A | 0.0000 |
| TBC1D5   | 0.0000 |
| TBCE     | 0.0000 |
| TBCK     | 0.0000 |
| TBK1     | 0.0000 |
| TBL1XR1  | 0.0000 |
| TBL1Y    | 0.0000 |
| TBRG1    | 0.0000 |
| TBX19    | 0.0000 |
| TBXAS1   | 0.0000 |
| TCEAL5   | 0.0000 |
| TCEAL6   | 0.0000 |
| TCEB3    | 0.0000 |
| TCEB3B   | 0.0000 |
| TCEB3C   | 0.0000 |
| TCERG1   | 0.0000 |
| TCF4     | 0.0000 |
| TCTEX1D2 | 0.0000 |
| TDGF1P3  | 0.0000 |
| TDRD3    | 0.0000 |
| TEAD3    | 0.0000 |
| TEKT2    | 0.0000 |
| TEKT5    | 0.0000 |
| TERT     | 0.0000 |
| TESK2    | 0.0000 |
| TEX19    | 0.0000 |
| TFAP2B   | 0.0000 |
| TFCP2    | 0.0000 |
| TFF1     | 0.0000 |
| TFG      | 0.0000 |

|           |        |
|-----------|--------|
| TGFA      | 0.0000 |
| TGFB1     | 0.0000 |
| TGM4      | 0.0000 |
| TGM5      | 0.0000 |
| THAP3     | 0.0000 |
| THAP5     | 0.0000 |
| THAP7     | 0.0000 |
| THBS1     | 0.0000 |
| THOC2     | 0.0000 |
| THOC3     | 0.0000 |
| THOC7     | 0.0000 |
| THPO      | 0.0000 |
| THSD1     | 0.0000 |
| THUMPD1   | 0.0000 |
| THUMPD2   | 0.0000 |
| THUMPD3   | 0.0000 |
| TICAM1    | 0.0000 |
| TLE3      | 0.0000 |
| TLE4      | 0.0000 |
| TLR4      | 0.0000 |
| TM2D3     | 0.0000 |
| TM4SF20   | 0.0000 |
| TMC2      | 0.0000 |
| TMCO3     | 0.0000 |
| TMEM102   | 0.0000 |
| TMEM106B  | 0.0000 |
| TMEM107   | 0.0000 |
| TMEM119   | 0.0000 |
| TMEM130   | 0.0000 |
| TMEM135   | 0.0000 |
| TMEM205   | 0.0000 |
| TMEM206   | 0.0000 |
| TMEM223   | 0.0000 |
| TMEM234   | 0.0000 |
| TMEM30A   | 0.0000 |
| TMEM43    | 0.0000 |
| TMEM47    | 0.0000 |
| TMEM52    | 0.0000 |
| TMEM57    | 0.0000 |
| TMEM63A   | 0.0000 |
| TMEM63B   | 0.0000 |
| TMIE      | 0.0000 |
| TMPRSS11E | 0.0000 |
| TMPRSS4   | 0.0000 |
| TMTC2     | 0.0000 |
| TMTC3     | 0.0000 |

|           |        |
|-----------|--------|
| TNFAIP8   | 0.0000 |
| TNFRSF10A | 0.0000 |
| TNFRSF1A  | 0.0000 |
| TNFRSF25  | 0.0000 |
| TNFRSF9   | 0.0000 |
| TNIK      | 0.0000 |
| TNNI2     | 0.0000 |
| TNPO2     | 0.0000 |
| TNRC18    | 0.0000 |
| TOE1      | 0.0000 |
| TOLLIP    | 0.0000 |
| TOM1L2    | 0.0000 |
| TOMM70A   | 0.0000 |
| TOP3B     | 0.0000 |
| TOR1A     | 0.0000 |
| TP53TG1   | 0.0000 |
| TP53TG3   | 0.0000 |
| TPCN1     | 0.0000 |
| TPD52     | 0.0000 |
| TPD52L2   | 0.0000 |
| TPMT      | 0.0000 |
| TPPP3     | 0.0000 |
| TPTE2P2   | 0.0000 |
| TRAM1     | 0.0000 |
| TRANK1    | 0.0000 |
| TRAPPC10  | 0.0000 |
| TRAPPC6A  | 0.0000 |
| TRIB2     | 0.0000 |
| TRIM35    | 0.0000 |
| TRIM36    | 0.0000 |
| TRIM4     | 0.0000 |
| TRIM46    | 0.0000 |
| TRIM55    | 0.0000 |
| TRIM59    | 0.0000 |
| TRIM63    | 0.0000 |
| TRIM68    | 0.0000 |
| TRMT1L    | 0.0000 |
| TRMT2A    | 0.0000 |
| TRNAU1AP  | 0.0000 |
| TRPC4AP   | 0.0000 |
| TRPM1     | 0.0000 |
| TRPM5     | 0.0000 |
| TRPM8     | 0.0000 |
| TRPV1     | 0.0000 |
| TSC22D3   | 0.0000 |
| TSGA13    | 0.0000 |

|           |        |
|-----------|--------|
| TSHZ2     | 0.0000 |
| TSPAN18   | 0.0000 |
| TSPYL4    | 0.0000 |
| TSPYL6    | 0.0000 |
| TTC1      | 0.0000 |
| TTC14     | 0.0000 |
| TTC27     | 0.0000 |
| TTC29     | 0.0000 |
| TTC3P1    | 0.0000 |
| TTC5      | 0.0000 |
| TTF1      | 0.0000 |
| TTLL1     | 0.0000 |
| TTLL3     | 0.0000 |
| TTY1      | 0.0000 |
| TUBB      | 0.0000 |
| TUBD1     | 0.0000 |
| TUBGCP4   | 0.0000 |
| TWISTNB   | 0.0000 |
| TXNDC2    | 0.0000 |
| TXNDC5    | 0.0000 |
| TXNDC9    | 0.0000 |
| TXNRD1    | 0.0000 |
| TXNRD3    | 0.0000 |
| U2AF1     | 0.0000 |
| U2AF2     | 0.0000 |
| UAP1      | 0.0000 |
| UBAP1L    | 0.0000 |
| UBAP2L    | 0.0000 |
| UBE2B     | 0.0000 |
| UBE2E3    | 0.0000 |
| UBE2M     | 0.0000 |
| UBE2Q1    | 0.0000 |
| UBE2V2    | 0.0000 |
| UBE2W     | 0.0000 |
| UBE3A     | 0.0000 |
| UBL7      | 0.0000 |
| UBQLN1    | 0.0000 |
| UBQLN2    | 0.0000 |
| UCN3      | 0.0000 |
| UCP2      | 0.0000 |
| UFD1L     | 0.0000 |
| UFL1      | 0.0000 |
| UG0898H09 | 0.0000 |
| UGP2      | 0.0000 |
| UGT2B10   | 0.0000 |
| UGT3A2    | 0.0000 |

|         |        |
|---------|--------|
| UHRF2   | 0.0000 |
| ULBP3   | 0.0000 |
| UMOD    | 0.0000 |
| UNC13C  | 0.0000 |
| UNC45B  | 0.0000 |
| UNQ6975 | 0.0000 |
| UPK1B   | 0.0000 |
| UQCRQ   | 0.0000 |
| URGCP   | 0.0000 |
| USF1    | 0.0000 |
| USP21   | 0.0000 |
| USP34   | 0.0000 |
| USP42   | 0.0000 |
| USP47   | 0.0000 |
| UTP15   | 0.0000 |
| UTP6    | 0.0000 |
| UVRAG   | 0.0000 |
| VAPB    | 0.0000 |
| VCL     | 0.0000 |
| VCX2    | 0.0000 |
| VDAC3   | 0.0000 |
| VGf     | 0.0000 |
| VIPR1   | 0.0000 |
| VPS16   | 0.0000 |
| VPS18   | 0.0000 |
| VPS26A  | 0.0000 |
| VWA3A   | 0.0000 |
| VWC2    | 0.0000 |
| WARS    | 0.0000 |
| WASH1   | 0.0000 |
| WASH7P  | 0.0000 |
| WDFY1   | 0.0000 |
| WDR1    | 0.0000 |
| WDR13   | 0.0000 |
| WDR16   | 0.0000 |
| WDR3    | 0.0000 |
| WDR36   | 0.0000 |
| WDR88   | 0.0000 |
| WDR92   | 0.0000 |
| WFDC10A | 0.0000 |
| WFDC3   | 0.0000 |
| WFS1    | 0.0000 |
| WIPF3   | 0.0000 |
| WIZ     | 0.0000 |
| WNK3    | 0.0000 |
| WNT10A  | 0.0000 |



|         |        |
|---------|--------|
| WNT2    | 0.0000 |
| WNT3A   | 0.0000 |
| WNT4    | 0.0000 |
| WNT6    | 0.0000 |
| WTAP    | 0.0000 |
| WWC3    | 0.0000 |
| XCR1    | 0.0000 |
| XKR6    | 0.0000 |
| XPNPEP2 | 0.0000 |
| XRCC6   | 0.0000 |
| XRN1    | 0.0000 |
| YEATS4  | 0.0000 |
| YES1    | 0.0000 |
| YIPF1   | 0.0000 |
| YPEL2   | 0.0000 |
| YTHDF3  | 0.0000 |
| ZBED2   | 0.0000 |
| ZBED3   | 0.0000 |
| ZBTB39  | 0.0000 |
| ZBTB6   | 0.0000 |
| ZC3H11A | 0.0000 |
| ZC3HC1  | 0.0000 |
| ZCCHC7  | 0.0000 |
| ZDHHC3  | 0.0000 |
| ZDHHC8  | 0.0000 |
| ZFP161  | 0.0000 |
| ZFP82   | 0.0000 |
| ZFYVE16 | 0.0000 |
| ZIC1    | 0.0000 |
| ZMIZ1   | 0.0000 |
| ZMIZ2   | 0.0000 |
| ZMYND19 | 0.0000 |
| ZNF101  | 0.0000 |
| ZNF107  | 0.0000 |
| ZNF117  | 0.0000 |
| ZNF134  | 0.0000 |
| ZNF141  | 0.0000 |
| ZNF146  | 0.0000 |
| ZNF184  | 0.0000 |
| ZNF214  | 0.0000 |
| ZNF230  | 0.0000 |
| ZNF238  | 0.0000 |
| ZNF277  | 0.0000 |
| ZNF30   | 0.0000 |
| ZNF302  | 0.0000 |
| ZNF337  | 0.0000 |

|           |        |
|-----------|--------|
| ZNF33A    | 0.0000 |
| ZNF367    | 0.0000 |
| ZNF410    | 0.0000 |
| ZNF418    | 0.0000 |
| ZNF43     | 0.0000 |
| ZNF439    | 0.0000 |
| ZNF443    | 0.0000 |
| ZNF48     | 0.0000 |
| ZNF496    | 0.0000 |
| ZNF544    | 0.0000 |
| ZNF551    | 0.0000 |
| ZNF556    | 0.0000 |
| ZNF567    | 0.0000 |
| ZNF570    | 0.0000 |
| ZNF572    | 0.0000 |
| ZNF573    | 0.0000 |
| ZNF575    | 0.0000 |
| ZNF578    | 0.0000 |
| ZNF611    | 0.0000 |
| ZNF623    | 0.0000 |
| ZNF638    | 0.0000 |
| ZNF653    | 0.0000 |
| ZNF689    | 0.0000 |
| ZNF702P   | 0.0000 |
| ZNF703    | 0.0000 |
| ZNF704    | 0.0000 |
| ZNF706    | 0.0000 |
| ZNF716    | 0.0000 |
| ZNF730    | 0.0000 |
| ZNF767    | 0.0000 |
| ZNF771    | 0.0000 |
| ZNF773    | 0.0000 |
| ZNF787    | 0.0000 |
| ZNF79     | 0.0000 |
| ZNF791    | 0.0000 |
| ZNF826P   | 0.0000 |
| ZNF829    | 0.0000 |
| ZNF843    | 0.0000 |
| ZNF847P   | 0.0000 |
| ZNF92     | 0.0000 |
| ZNFX1-AS1 | 0.0000 |
| ZP2       | 0.0000 |
| ZP3       | 0.0000 |
| ZSCAN21   | 0.0000 |
| ZSCAN5A   | 0.0000 |
| ZZZ3      | 0.0000 |
