# Supplementary material for: Identifying Infliximab‐ (IFX‐) Responsive Blood Signatures for the Treatment of Rheumatoid Arthritis
Source: Hindawi journal article supplement (doi:10.1155/2021/5556784), 2021-01-01
Supplement: f1 [file 5556784.f1.zip › 5556784.f2.pdf]

| Number of features | SN    | SP    | ACC   | MCC   | Precision | F1-measure |
|--------------------|-------|-------|-------|-------|-----------|------------|
| 10                 | 0.357 | 1.000 | 0.807 | 0.529 | 1.000     | 0.526      |
| 20                 | 0.452 | 0.969 | 0.814 | 0.531 | 0.864     | 0.594      |
| 30                 | 0.429 | 0.969 | 0.807 | 0.511 | 0.857     | 0.571      |
| 40                 | 0.548 | 0.959 | 0.836 | 0.589 | 0.852     | 0.667      |
| 50                 | 0.643 | 0.959 | 0.864 | 0.664 | 0.871     | 0.740      |
| 60                 | 0.619 | 0.980 | 0.871 | 0.686 | 0.929     | 0.743      |
| 70                 | 0.643 | 0.949 | 0.857 | 0.646 | 0.844     | 0.730      |
| 80                 | 0.595 | 0.949 | 0.843 | 0.608 | 0.833     | 0.694      |
| 90                 | 0.548 | 0.908 | 0.800 | 0.497 | 0.719     | 0.622      |
| 100                | 0.548 | 0.918 | 0.807 | 0.514 | 0.742     | 0.630      |
| 110                | 0.643 | 0.929 | 0.843 | 0.611 | 0.794     | 0.711      |
| 120                | 0.595 | 0.918 | 0.821 | 0.555 | 0.758     | 0.667      |
| 130                | 0.571 | 0.918 | 0.814 | 0.535 | 0.750     | 0.649      |
| 140                | 0.571 | 0.908 | 0.807 | 0.518 | 0.727     | 0.640      |
| 150                | 0.595 | 0.939 | 0.836 | 0.589 | 0.806     | 0.685      |
| 160                | 0.548 | 0.929 | 0.814 | 0.532 | 0.767     | 0.639      |
| 170                | 0.548 | 0.918 | 0.807 | 0.514 | 0.742     | 0.630      |
| 180                | 0.595 | 0.918 | 0.821 | 0.555 | 0.758     | 0.667      |
| 190                | 0.571 | 0.918 | 0.814 | 0.535 | 0.750     | 0.649      |
| 200                | 0.548 | 0.908 | 0.800 | 0.497 | 0.719     | 0.622      |
| 210                | 0.548 | 0.898 | 0.793 | 0.481 | 0.697     | 0.613      |
| 220                | 0.595 | 0.908 | 0.814 | 0.538 | 0.735     | 0.658      |
| 230                | 0.595 | 0.918 | 0.821 | 0.555 | 0.758     | 0.667      |
| 240                | 0.571 | 0.929 | 0.821 | 0.552 | 0.774     | 0.658      |
| 250                | 0.571 | 0.959 | 0.843 | 0.608 | 0.857     | 0.686      |
| 260                | 0.643 | 0.949 | 0.857 | 0.646 | 0.844     | 0.730      |
| 270                | 0.619 | 0.949 | 0.850 | 0.627 | 0.839     | 0.712      |
| 280                | 0.571 | 0.929 | 0.821 | 0.552 | 0.774     | 0.658      |
| 290                | 0.595 | 0.929 | 0.829 | 0.572 | 0.781     | 0.676      |
| 300                | 0.571 | 0.918 | 0.814 | 0.535 | 0.750     | 0.649      |
| 310                | 0.595 | 0.949 | 0.843 | 0.608 | 0.833     | 0.694      |
| 320                | 0.595 | 0.939 | 0.836 | 0.589 | 0.806     | 0.685      |
| 330                | 0.619 | 0.939 | 0.843 | 0.609 | 0.813     | 0.703      |
| 340                | 0.643 | 0.959 | 0.864 | 0.664 | 0.871     | 0.740      |
| 350                | 0.619 | 0.959 | 0.857 | 0.646 | 0.867     | 0.722      |
| 360                | 0.595 | 0.949 | 0.843 | 0.608 | 0.833     | 0.694      |
| 370                | 0.619 | 0.959 | 0.857 | 0.646 | 0.867     | 0.722      |
| 380                | 0.595 | 0.949 | 0.843 | 0.608 | 0.833     | 0.694      |
| 390                | 0.595 | 0.949 | 0.843 | 0.608 | 0.833     | 0.694      |
| 400                | 0.595 | 0.949 | 0.843 | 0.608 | 0.833     | 0.694      |
| 410                | 0.595 | 0.949 | 0.843 | 0.608 | 0.833     | 0.694      |
| 420                | 0.619 | 0.949 | 0.850 | 0.627 | 0.839     | 0.712      |
| 430                | 0.595 | 0.949 | 0.843 | 0.608 | 0.833     | 0.694      |
| 440                | 0.643 | 0.939 | 0.850 | 0.628 | 0.818     | 0.720      |
| 450                | 0.667 | 0.969 | 0.879 | 0.702 | 0.903     | 0.767      |
| 460                | 0.667 | 0.969 | 0.879 | 0.702 | 0.903     | 0.767      |
| 470                | 0.643 | 0.969 | 0.871 | 0.684 | 0.900     | 0.750      |
| 480                | 0.667 | 0.969 | 0.879 | 0.702 | 0.903     | 0.767      |
| 490                | 0.690 | 0.959 | 0.879 | 0.701 | 0.879     | 0.773      |
| 500                | 0.714 | 0.969 | 0.893 | 0.738 | 0.909     | 0.800      |
| 510                | 0.643 | 0.959 | 0.864 | 0.664 | 0.871     | 0.740      |
| 520                | 0.619 | 0.969 | 0.864 | 0.665 | 0.897     | 0.732      |

|      |       |       |       |       |       |       |
|------|-------|-------|-------|-------|-------|-------|
| 530  | 0.595 | 0.959 | 0.850 | 0.627 | 0.862 | 0.704 |
| 540  | 0.595 | 0.959 | 0.850 | 0.627 | 0.862 | 0.704 |
| 550  | 0.619 | 0.959 | 0.857 | 0.646 | 0.867 | 0.722 |
| 560  | 0.595 | 0.959 | 0.850 | 0.627 | 0.862 | 0.704 |
| 570  | 0.619 | 0.959 | 0.857 | 0.646 | 0.867 | 0.722 |
| 580  | 0.619 | 0.949 | 0.850 | 0.627 | 0.839 | 0.712 |
| 590  | 0.619 | 0.959 | 0.857 | 0.646 | 0.867 | 0.722 |
| 600  | 0.643 | 0.959 | 0.864 | 0.664 | 0.871 | 0.740 |
| 610  | 0.643 | 0.949 | 0.857 | 0.646 | 0.844 | 0.730 |
| 620  | 0.619 | 0.949 | 0.850 | 0.627 | 0.839 | 0.712 |
| 630  | 0.643 | 0.949 | 0.857 | 0.646 | 0.844 | 0.730 |
| 640  | 0.667 | 0.939 | 0.857 | 0.647 | 0.824 | 0.737 |
| 650  | 0.667 | 0.939 | 0.857 | 0.647 | 0.824 | 0.737 |
| 660  | 0.643 | 0.949 | 0.857 | 0.646 | 0.844 | 0.730 |
| 670  | 0.619 | 0.939 | 0.843 | 0.609 | 0.813 | 0.703 |
| 680  | 0.643 | 0.949 | 0.857 | 0.646 | 0.844 | 0.730 |
| 690  | 0.667 | 0.959 | 0.871 | 0.683 | 0.875 | 0.757 |
| 700  | 0.643 | 0.969 | 0.871 | 0.684 | 0.900 | 0.750 |
| 710  | 0.667 | 0.959 | 0.871 | 0.683 | 0.875 | 0.757 |
| 720  | 0.667 | 0.969 | 0.879 | 0.702 | 0.903 | 0.767 |
| 730  | 0.667 | 0.959 | 0.871 | 0.683 | 0.875 | 0.757 |
| 740  | 0.690 | 0.949 | 0.871 | 0.683 | 0.853 | 0.763 |
| 750  | 0.690 | 0.969 | 0.886 | 0.720 | 0.906 | 0.784 |
| 760  | 0.690 | 0.959 | 0.879 | 0.701 | 0.879 | 0.773 |
| 770  | 0.667 | 0.959 | 0.871 | 0.683 | 0.875 | 0.757 |
| 780  | 0.667 | 0.959 | 0.871 | 0.683 | 0.875 | 0.757 |
| 790  | 0.667 | 0.959 | 0.871 | 0.683 | 0.875 | 0.757 |
| 800  | 0.643 | 0.969 | 0.871 | 0.684 | 0.900 | 0.750 |
| 810  | 0.643 | 0.969 | 0.871 | 0.684 | 0.900 | 0.750 |
| 820  | 0.643 | 0.969 | 0.871 | 0.684 | 0.900 | 0.750 |
| 830  | 0.643 | 0.969 | 0.871 | 0.684 | 0.900 | 0.750 |
| 840  | 0.643 | 0.969 | 0.871 | 0.684 | 0.900 | 0.750 |
| 850  | 0.643 | 0.969 | 0.871 | 0.684 | 0.900 | 0.750 |
| 860  | 0.643 | 0.949 | 0.857 | 0.646 | 0.844 | 0.730 |
| 870  | 0.643 | 0.949 | 0.857 | 0.646 | 0.844 | 0.730 |
| 880  | 0.643 | 0.959 | 0.864 | 0.664 | 0.871 | 0.740 |
| 890  | 0.619 | 0.959 | 0.857 | 0.646 | 0.867 | 0.722 |
| 900  | 0.619 | 0.959 | 0.857 | 0.646 | 0.867 | 0.722 |
| 910  | 0.619 | 0.969 | 0.864 | 0.665 | 0.897 | 0.732 |
| 920  | 0.619 | 0.959 | 0.857 | 0.646 | 0.867 | 0.722 |
| 930  | 0.619 | 0.959 | 0.857 | 0.646 | 0.867 | 0.722 |
| 940  | 0.619 | 0.959 | 0.857 | 0.646 | 0.867 | 0.722 |
| 950  | 0.619 | 0.969 | 0.864 | 0.665 | 0.897 | 0.732 |
| 960  | 0.619 | 0.969 | 0.864 | 0.665 | 0.897 | 0.732 |
| 970  | 0.619 | 0.969 | 0.864 | 0.665 | 0.897 | 0.732 |
| 980  | 0.619 | 0.969 | 0.864 | 0.665 | 0.897 | 0.732 |
| 990  | 0.643 | 0.969 | 0.871 | 0.684 | 0.900 | 0.750 |
| 1000 | 0.643 | 0.959 | 0.864 | 0.664 | 0.871 | 0.740 |
| 1010 | 0.690 | 0.969 | 0.886 | 0.720 | 0.906 | 0.784 |
| 1020 | 0.667 | 0.969 | 0.879 | 0.702 | 0.903 | 0.767 |
| 1030 | 0.690 | 0.980 | 0.893 | 0.740 | 0.935 | 0.795 |
| 1040 | 0.667 | 0.969 | 0.879 | 0.702 | 0.903 | 0.767 |
| 1050 | 0.643 | 0.959 | 0.864 | 0.664 | 0.871 | 0.740 |

|      |       |       |       |       |       |       |
|------|-------|-------|-------|-------|-------|-------|
| 1060 | 0.619 | 0.990 | 0.879 | 0.707 | 0.963 | 0.754 |
| 1070 | 0.619 | 0.990 | 0.879 | 0.707 | 0.963 | 0.754 |
| 1080 | 0.643 | 0.990 | 0.886 | 0.725 | 0.964 | 0.771 |
| 1090 | 0.595 | 0.990 | 0.871 | 0.689 | 0.962 | 0.735 |
| 1100 | 0.595 | 0.990 | 0.871 | 0.689 | 0.962 | 0.735 |
| 1110 | 0.595 | 0.990 | 0.871 | 0.689 | 0.962 | 0.735 |
| 1120 | 0.571 | 0.990 | 0.864 | 0.672 | 0.960 | 0.716 |
| 1130 | 0.595 | 0.980 | 0.864 | 0.668 | 0.926 | 0.725 |
| 1140 | 0.619 | 0.980 | 0.871 | 0.686 | 0.929 | 0.743 |
| 1150 | 0.619 | 0.980 | 0.871 | 0.686 | 0.929 | 0.743 |
| 1160 | 0.643 | 0.990 | 0.886 | 0.725 | 0.964 | 0.771 |
| 1170 | 0.643 | 0.990 | 0.886 | 0.725 | 0.964 | 0.771 |
| 1180 | 0.619 | 0.980 | 0.871 | 0.686 | 0.929 | 0.743 |
| 1190 | 0.619 | 0.980 | 0.871 | 0.686 | 0.929 | 0.743 |
| 1200 | 0.643 | 0.980 | 0.879 | 0.704 | 0.931 | 0.761 |
| 1210 | 0.643 | 0.980 | 0.879 | 0.704 | 0.931 | 0.761 |
| 1220 | 0.667 | 0.990 | 0.893 | 0.742 | 0.966 | 0.789 |
| 1230 | 0.667 | 0.990 | 0.893 | 0.742 | 0.966 | 0.789 |
| 1240 | 0.667 | 0.990 | 0.893 | 0.742 | 0.966 | 0.789 |
| 1250 | 0.667 | 0.990 | 0.893 | 0.742 | 0.966 | 0.789 |
| 1260 | 0.690 | 0.990 | 0.900 | 0.760 | 0.967 | 0.806 |
| 1270 | 0.690 | 0.990 | 0.900 | 0.760 | 0.967 | 0.806 |
| 1280 | 0.690 | 0.990 | 0.900 | 0.760 | 0.967 | 0.806 |
| 1290 | 0.690 | 0.990 | 0.900 | 0.760 | 0.967 | 0.806 |
| 1300 | 0.667 | 0.990 | 0.893 | 0.742 | 0.966 | 0.789 |
| 1310 | 0.667 | 0.990 | 0.893 | 0.742 | 0.966 | 0.789 |
| 1320 | 0.690 | 0.990 | 0.900 | 0.760 | 0.967 | 0.806 |
| 1330 | 0.690 | 0.990 | 0.900 | 0.760 | 0.967 | 0.806 |
| 1340 | 0.667 | 0.990 | 0.893 | 0.742 | 0.966 | 0.789 |
| 1350 | 0.690 | 0.990 | 0.900 | 0.760 | 0.967 | 0.806 |
| 1360 | 0.690 | 0.990 | 0.900 | 0.760 | 0.967 | 0.806 |
| 1370 | 0.690 | 0.990 | 0.900 | 0.760 | 0.967 | 0.806 |
| 1380 | 0.667 | 0.990 | 0.893 | 0.742 | 0.966 | 0.789 |
| 1390 | 0.690 | 0.980 | 0.893 | 0.740 | 0.935 | 0.795 |
| 1400 | 0.690 | 0.980 | 0.893 | 0.740 | 0.935 | 0.795 |
| 1410 | 0.690 | 0.980 | 0.893 | 0.740 | 0.935 | 0.795 |
| 1420 | 0.690 | 0.980 | 0.893 | 0.740 | 0.935 | 0.795 |
| 1430 | 0.690 | 0.980 | 0.893 | 0.740 | 0.935 | 0.795 |
| 1440 | 0.667 | 0.980 | 0.886 | 0.722 | 0.933 | 0.778 |
| 1450 | 0.690 | 0.980 | 0.893 | 0.740 | 0.935 | 0.795 |
| 1460 | 0.667 | 0.980 | 0.886 | 0.722 | 0.933 | 0.778 |
| 1470 | 0.667 | 0.980 | 0.886 | 0.722 | 0.933 | 0.778 |
| 1480 | 0.667 | 0.980 | 0.886 | 0.722 | 0.933 | 0.778 |
| 1490 | 0.667 | 0.980 | 0.886 | 0.722 | 0.933 | 0.778 |
| 1500 | 0.667 | 0.980 | 0.886 | 0.722 | 0.933 | 0.778 |
| 1510 | 0.667 | 0.969 | 0.879 | 0.702 | 0.903 | 0.767 |
| 1520 | 0.667 | 0.969 | 0.879 | 0.702 | 0.903 | 0.767 |
| 1530 | 0.667 | 0.969 | 0.879 | 0.702 | 0.903 | 0.767 |
| 1540 | 0.667 | 0.969 | 0.879 | 0.702 | 0.903 | 0.767 |
| 1550 | 0.667 | 0.969 | 0.879 | 0.702 | 0.903 | 0.767 |
| 1560 | 0.667 | 0.969 | 0.879 | 0.702 | 0.903 | 0.767 |
| 1570 | 0.667 | 0.969 | 0.879 | 0.702 | 0.903 | 0.767 |
| 1580 | 0.667 | 0.969 | 0.879 | 0.702 | 0.903 | 0.767 |

|      |       |       |       |       |       |       |
|------|-------|-------|-------|-------|-------|-------|
| 1590 | 0.667 | 0.969 | 0.879 | 0.702 | 0.903 | 0.767 |
| 1600 | 0.667 | 0.969 | 0.879 | 0.702 | 0.903 | 0.767 |
| 1610 | 0.643 | 0.969 | 0.871 | 0.684 | 0.900 | 0.750 |
| 1620 | 0.667 | 0.969 | 0.879 | 0.702 | 0.903 | 0.767 |
| 1630 | 0.667 | 0.969 | 0.879 | 0.702 | 0.903 | 0.767 |
| 1640 | 0.643 | 0.969 | 0.871 | 0.684 | 0.900 | 0.750 |
| 1650 | 0.643 | 0.969 | 0.871 | 0.684 | 0.900 | 0.750 |
| 1660 | 0.643 | 0.969 | 0.871 | 0.684 | 0.900 | 0.750 |
| 1670 | 0.667 | 0.969 | 0.879 | 0.702 | 0.903 | 0.767 |
| 1680 | 0.667 | 0.969 | 0.879 | 0.702 | 0.903 | 0.767 |
| 1690 | 0.667 | 0.969 | 0.879 | 0.702 | 0.903 | 0.767 |
| 1700 | 0.667 | 0.969 | 0.879 | 0.702 | 0.903 | 0.767 |
| 1710 | 0.667 | 0.969 | 0.879 | 0.702 | 0.903 | 0.767 |
| 1720 | 0.667 | 0.969 | 0.879 | 0.702 | 0.903 | 0.767 |
| 1730 | 0.643 | 0.969 | 0.871 | 0.684 | 0.900 | 0.750 |
| 1740 | 0.643 | 0.969 | 0.871 | 0.684 | 0.900 | 0.750 |
| 1750 | 0.643 | 0.969 | 0.871 | 0.684 | 0.900 | 0.750 |
| 1760 | 0.667 | 0.980 | 0.886 | 0.722 | 0.933 | 0.778 |
| 1770 | 0.643 | 0.980 | 0.879 | 0.704 | 0.931 | 0.761 |
| 1780 | 0.643 | 0.980 | 0.879 | 0.704 | 0.931 | 0.761 |
| 1790 | 0.643 | 0.969 | 0.871 | 0.684 | 0.900 | 0.750 |
| 1800 | 0.643 | 0.980 | 0.879 | 0.704 | 0.931 | 0.761 |
| 1810 | 0.643 | 0.980 | 0.879 | 0.704 | 0.931 | 0.761 |
| 1820 | 0.643 | 0.980 | 0.879 | 0.704 | 0.931 | 0.761 |
| 1830 | 0.643 | 0.980 | 0.879 | 0.704 | 0.931 | 0.761 |
| 1840 | 0.667 | 0.980 | 0.886 | 0.722 | 0.933 | 0.778 |
| 1850 | 0.643 | 0.980 | 0.879 | 0.704 | 0.931 | 0.761 |
| 1860 | 0.667 | 0.980 | 0.886 | 0.722 | 0.933 | 0.778 |
| 1870 | 0.667 | 0.969 | 0.879 | 0.702 | 0.903 | 0.767 |
| 1880 | 0.667 | 0.969 | 0.879 | 0.702 | 0.903 | 0.767 |
| 1890 | 0.667 | 0.980 | 0.886 | 0.722 | 0.933 | 0.778 |
| 1900 | 0.667 | 0.969 | 0.879 | 0.702 | 0.903 | 0.767 |
| 1910 | 0.667 | 0.969 | 0.879 | 0.702 | 0.903 | 0.767 |
| 1920 | 0.619 | 0.969 | 0.864 | 0.665 | 0.897 | 0.732 |
| 1930 | 0.643 | 0.969 | 0.871 | 0.684 | 0.900 | 0.750 |
| 1940 | 0.619 | 0.969 | 0.864 | 0.665 | 0.897 | 0.732 |
| 1950 | 0.619 | 0.969 | 0.864 | 0.665 | 0.897 | 0.732 |
| 1960 | 0.667 | 0.969 | 0.879 | 0.702 | 0.903 | 0.767 |
| 1970 | 0.667 | 0.969 | 0.879 | 0.702 | 0.903 | 0.767 |
| 1980 | 0.667 | 0.980 | 0.886 | 0.722 | 0.933 | 0.778 |
| 1990 | 0.667 | 0.980 | 0.886 | 0.722 | 0.933 | 0.778 |
| 2000 | 0.667 | 0.980 | 0.886 | 0.722 | 0.933 | 0.778 |
| 2010 | 0.667 | 0.980 | 0.886 | 0.722 | 0.933 | 0.778 |
| 2020 | 0.667 | 0.980 | 0.886 | 0.722 | 0.933 | 0.778 |
| 2030 | 0.667 | 0.980 | 0.886 | 0.722 | 0.933 | 0.778 |
| 2040 | 0.667 | 0.980 | 0.886 | 0.722 | 0.933 | 0.778 |
| 2050 | 0.667 | 0.980 | 0.886 | 0.722 | 0.933 | 0.778 |
| 2060 | 0.667 | 0.980 | 0.886 | 0.722 | 0.933 | 0.778 |
| 2070 | 0.667 | 0.980 | 0.886 | 0.722 | 0.933 | 0.778 |
| 2080 | 0.667 | 0.980 | 0.886 | 0.722 | 0.933 | 0.778 |
| 2090 | 0.667 | 0.980 | 0.886 | 0.722 | 0.933 | 0.778 |
| 2100 | 0.667 | 0.980 | 0.886 | 0.722 | 0.933 | 0.778 |
| 2110 | 0.667 | 0.980 | 0.886 | 0.722 | 0.933 | 0.778 |

|      |       |       |       |       |       |       |
|------|-------|-------|-------|-------|-------|-------|
| 2120 | 0.667 | 0.980 | 0.886 | 0.722 | 0.933 | 0.778 |
| 2130 | 0.667 | 0.969 | 0.879 | 0.702 | 0.903 | 0.767 |
| 2140 | 0.667 | 0.980 | 0.886 | 0.722 | 0.933 | 0.778 |
| 2150 | 0.667 | 0.980 | 0.886 | 0.722 | 0.933 | 0.778 |
| 2160 | 0.667 | 0.969 | 0.879 | 0.702 | 0.903 | 0.767 |
| 2170 | 0.667 | 0.980 | 0.886 | 0.722 | 0.933 | 0.778 |
| 2180 | 0.667 | 0.980 | 0.886 | 0.722 | 0.933 | 0.778 |
| 2190 | 0.667 | 0.980 | 0.886 | 0.722 | 0.933 | 0.778 |
| 2200 | 0.667 | 0.980 | 0.886 | 0.722 | 0.933 | 0.778 |
| 2210 | 0.667 | 0.980 | 0.886 | 0.722 | 0.933 | 0.778 |
| 2220 | 0.667 | 0.980 | 0.886 | 0.722 | 0.933 | 0.778 |
| 2230 | 0.667 | 0.969 | 0.879 | 0.702 | 0.903 | 0.767 |
| 2240 | 0.643 | 0.969 | 0.871 | 0.684 | 0.900 | 0.750 |
| 2250 | 0.643 | 0.969 | 0.871 | 0.684 | 0.900 | 0.750 |
| 2260 | 0.643 | 0.969 | 0.871 | 0.684 | 0.900 | 0.750 |
| 2270 | 0.643 | 0.959 | 0.864 | 0.664 | 0.871 | 0.740 |
| 2280 | 0.643 | 0.969 | 0.871 | 0.684 | 0.900 | 0.750 |
| 2290 | 0.643 | 0.959 | 0.864 | 0.664 | 0.871 | 0.740 |
| 2300 | 0.643 | 0.959 | 0.864 | 0.664 | 0.871 | 0.740 |
| 2310 | 0.643 | 0.959 | 0.864 | 0.664 | 0.871 | 0.740 |
| 2320 | 0.619 | 0.959 | 0.857 | 0.646 | 0.867 | 0.722 |
| 2330 | 0.595 | 0.959 | 0.850 | 0.627 | 0.862 | 0.704 |
| 2340 | 0.595 | 0.959 | 0.850 | 0.627 | 0.862 | 0.704 |
| 2350 | 0.595 | 0.959 | 0.850 | 0.627 | 0.862 | 0.704 |
| 2360 | 0.595 | 0.959 | 0.850 | 0.627 | 0.862 | 0.704 |
| 2370 | 0.595 | 0.959 | 0.850 | 0.627 | 0.862 | 0.704 |
| 2380 | 0.595 | 0.959 | 0.850 | 0.627 | 0.862 | 0.704 |
| 2390 | 0.595 | 0.959 | 0.850 | 0.627 | 0.862 | 0.704 |
| 2400 | 0.595 | 0.959 | 0.850 | 0.627 | 0.862 | 0.704 |
| 2410 | 0.619 | 0.959 | 0.857 | 0.646 | 0.867 | 0.722 |
| 2420 | 0.595 | 0.969 | 0.857 | 0.647 | 0.893 | 0.714 |
| 2430 | 0.595 | 0.969 | 0.857 | 0.647 | 0.893 | 0.714 |
| 2440 | 0.643 | 0.969 | 0.871 | 0.684 | 0.900 | 0.750 |
| 2450 | 0.643 | 0.969 | 0.871 | 0.684 | 0.900 | 0.750 |
| 2460 | 0.643 | 0.969 | 0.871 | 0.684 | 0.900 | 0.750 |
| 2470 | 0.643 | 0.969 | 0.871 | 0.684 | 0.900 | 0.750 |
| 2480 | 0.643 | 0.980 | 0.879 | 0.704 | 0.931 | 0.761 |
| 2490 | 0.643 | 0.980 | 0.879 | 0.704 | 0.931 | 0.761 |
| 2500 | 0.643 | 0.980 | 0.879 | 0.704 | 0.931 | 0.761 |
| 2510 | 0.643 | 0.980 | 0.879 | 0.704 | 0.931 | 0.761 |
| 2520 | 0.643 | 0.980 | 0.879 | 0.704 | 0.931 | 0.761 |
| 2530 | 0.643 | 0.980 | 0.879 | 0.704 | 0.931 | 0.761 |
| 2540 | 0.643 | 0.980 | 0.879 | 0.704 | 0.931 | 0.761 |
| 2550 | 0.643 | 0.980 | 0.879 | 0.704 | 0.931 | 0.761 |
| 2560 | 0.643 | 0.980 | 0.879 | 0.704 | 0.931 | 0.761 |
| 2570 | 0.643 | 0.980 | 0.879 | 0.704 | 0.931 | 0.761 |
| 2580 | 0.643 | 0.980 | 0.879 | 0.704 | 0.931 | 0.761 |
| 2590 | 0.643 | 0.980 | 0.879 | 0.704 | 0.931 | 0.761 |
| 2600 | 0.643 | 0.980 | 0.879 | 0.704 | 0.931 | 0.761 |
| 2610 | 0.643 | 0.980 | 0.879 | 0.704 | 0.931 | 0.761 |
| 2620 | 0.643 | 0.980 | 0.879 | 0.704 | 0.931 | 0.761 |
| 2630 | 0.643 | 0.980 | 0.879 | 0.704 | 0.931 | 0.761 |
| 2640 | 0.643 | 0.980 | 0.879 | 0.704 | 0.931 | 0.761 |

|      |       |       |       |       |       |       |
|------|-------|-------|-------|-------|-------|-------|
| 2650 | 0.643 | 0.980 | 0.879 | 0.704 | 0.931 | 0.761 |
| 2660 | 0.643 | 0.980 | 0.879 | 0.704 | 0.931 | 0.761 |
| 2670 | 0.643 | 0.980 | 0.879 | 0.704 | 0.931 | 0.761 |
| 2680 | 0.643 | 0.980 | 0.879 | 0.704 | 0.931 | 0.761 |
| 2690 | 0.643 | 0.980 | 0.879 | 0.704 | 0.931 | 0.761 |
| 2700 | 0.643 | 0.980 | 0.879 | 0.704 | 0.931 | 0.761 |
| 2710 | 0.643 | 0.980 | 0.879 | 0.704 | 0.931 | 0.761 |
| 2720 | 0.643 | 0.980 | 0.879 | 0.704 | 0.931 | 0.761 |
| 2730 | 0.643 | 0.980 | 0.879 | 0.704 | 0.931 | 0.761 |
| 2740 | 0.643 | 0.980 | 0.879 | 0.704 | 0.931 | 0.761 |
| 2750 | 0.643 | 0.969 | 0.871 | 0.684 | 0.900 | 0.750 |
| 2760 | 0.643 | 0.969 | 0.871 | 0.684 | 0.900 | 0.750 |
| 2770 | 0.643 | 0.969 | 0.871 | 0.684 | 0.900 | 0.750 |
| 2780 | 0.643 | 0.969 | 0.871 | 0.684 | 0.900 | 0.750 |
| 2790 | 0.643 | 0.969 | 0.871 | 0.684 | 0.900 | 0.750 |
| 2800 | 0.643 | 0.969 | 0.871 | 0.684 | 0.900 | 0.750 |
| 2810 | 0.643 | 0.969 | 0.871 | 0.684 | 0.900 | 0.750 |
| 2820 | 0.643 | 0.969 | 0.871 | 0.684 | 0.900 | 0.750 |
| 2830 | 0.643 | 0.969 | 0.871 | 0.684 | 0.900 | 0.750 |
| 2840 | 0.643 | 0.969 | 0.871 | 0.684 | 0.900 | 0.750 |
| 2850 | 0.643 | 0.969 | 0.871 | 0.684 | 0.900 | 0.750 |
| 2860 | 0.643 | 0.969 | 0.871 | 0.684 | 0.900 | 0.750 |
| 2870 | 0.643 | 0.969 | 0.871 | 0.684 | 0.900 | 0.750 |
| 2880 | 0.643 | 0.969 | 0.871 | 0.684 | 0.900 | 0.750 |
| 2890 | 0.643 | 0.969 | 0.871 | 0.684 | 0.900 | 0.750 |
| 2900 | 0.643 | 0.969 | 0.871 | 0.684 | 0.900 | 0.750 |
| 2910 | 0.643 | 0.969 | 0.871 | 0.684 | 0.900 | 0.750 |
| 2920 | 0.643 | 0.969 | 0.871 | 0.684 | 0.900 | 0.750 |
| 2930 | 0.643 | 0.969 | 0.871 | 0.684 | 0.900 | 0.750 |
| 2940 | 0.643 | 0.969 | 0.871 | 0.684 | 0.900 | 0.750 |
| 2950 | 0.643 | 0.969 | 0.871 | 0.684 | 0.900 | 0.750 |
| 2960 | 0.619 | 0.969 | 0.864 | 0.665 | 0.897 | 0.732 |
| 2970 | 0.619 | 0.969 | 0.864 | 0.665 | 0.897 | 0.732 |
| 2980 | 0.619 | 0.969 | 0.864 | 0.665 | 0.897 | 0.732 |
| 2990 | 0.619 | 0.969 | 0.864 | 0.665 | 0.897 | 0.732 |
| 3000 | 0.619 | 0.969 | 0.864 | 0.665 | 0.897 | 0.732 |
| 3010 | 0.619 | 0.969 | 0.864 | 0.665 | 0.897 | 0.732 |
| 3020 | 0.619 | 0.969 | 0.864 | 0.665 | 0.897 | 0.732 |
| 3030 | 0.619 | 0.969 | 0.864 | 0.665 | 0.897 | 0.732 |
| 3040 | 0.619 | 0.969 | 0.864 | 0.665 | 0.897 | 0.732 |
| 3050 | 0.619 | 0.969 | 0.864 | 0.665 | 0.897 | 0.732 |
| 3060 | 0.619 | 0.969 | 0.864 | 0.665 | 0.897 | 0.732 |
| 3070 | 0.619 | 0.969 | 0.864 | 0.665 | 0.897 | 0.732 |
| 3080 | 0.619 | 0.969 | 0.864 | 0.665 | 0.897 | 0.732 |
| 3090 | 0.619 | 0.969 | 0.864 | 0.665 | 0.897 | 0.732 |
| 3100 | 0.619 | 0.969 | 0.864 | 0.665 | 0.897 | 0.732 |
| 3110 | 0.619 | 0.969 | 0.864 | 0.665 | 0.897 | 0.732 |
| 3120 | 0.619 | 0.969 | 0.864 | 0.665 | 0.897 | 0.732 |
| 3130 | 0.619 | 0.969 | 0.864 | 0.665 | 0.897 | 0.732 |
| 3140 | 0.619 | 0.959 | 0.857 | 0.646 | 0.867 | 0.722 |
| 3150 | 0.619 | 0.959 | 0.857 | 0.646 | 0.867 | 0.722 |
| 3160 | 0.619 | 0.959 | 0.857 | 0.646 | 0.867 | 0.722 |
| 3170 | 0.619 | 0.959 | 0.857 | 0.646 | 0.867 | 0.722 |

|      |       |       |       |       |       |       |
|------|-------|-------|-------|-------|-------|-------|
| 3180 | 0.619 | 0.959 | 0.857 | 0.646 | 0.867 | 0.722 |
| 3190 | 0.619 | 0.959 | 0.857 | 0.646 | 0.867 | 0.722 |
| 3200 | 0.619 | 0.959 | 0.857 | 0.646 | 0.867 | 0.722 |
| 3210 | 0.595 | 0.959 | 0.850 | 0.627 | 0.862 | 0.704 |
| 3220 | 0.595 | 0.959 | 0.850 | 0.627 | 0.862 | 0.704 |
| 3230 | 0.595 | 0.959 | 0.850 | 0.627 | 0.862 | 0.704 |
| 3240 | 0.595 | 0.959 | 0.850 | 0.627 | 0.862 | 0.704 |
| 3250 | 0.595 | 0.959 | 0.850 | 0.627 | 0.862 | 0.704 |
| 3260 | 0.595 | 0.959 | 0.850 | 0.627 | 0.862 | 0.704 |
| 3270 | 0.595 | 0.959 | 0.850 | 0.627 | 0.862 | 0.704 |
| 3280 | 0.595 | 0.959 | 0.850 | 0.627 | 0.862 | 0.704 |
| 3290 | 0.595 | 0.959 | 0.850 | 0.627 | 0.862 | 0.704 |
| 3300 | 0.595 | 0.959 | 0.850 | 0.627 | 0.862 | 0.704 |
| 3310 | 0.595 | 0.959 | 0.850 | 0.627 | 0.862 | 0.704 |
| 3320 | 0.595 | 0.959 | 0.850 | 0.627 | 0.862 | 0.704 |
| 3330 | 0.595 | 0.959 | 0.850 | 0.627 | 0.862 | 0.704 |
| 3340 | 0.595 | 0.959 | 0.850 | 0.627 | 0.862 | 0.704 |
| 3350 | 0.595 | 0.959 | 0.850 | 0.627 | 0.862 | 0.704 |
| 3360 | 0.595 | 0.959 | 0.850 | 0.627 | 0.862 | 0.704 |
| 3370 | 0.595 | 0.959 | 0.850 | 0.627 | 0.862 | 0.704 |
| 3380 | 0.595 | 0.959 | 0.850 | 0.627 | 0.862 | 0.704 |
| 3390 | 0.595 | 0.959 | 0.850 | 0.627 | 0.862 | 0.704 |
| 3400 | 0.595 | 0.959 | 0.850 | 0.627 | 0.862 | 0.704 |
| 3410 | 0.595 | 0.959 | 0.850 | 0.627 | 0.862 | 0.704 |
| 3420 | 0.595 | 0.959 | 0.850 | 0.627 | 0.862 | 0.704 |
| 3430 | 0.595 | 0.959 | 0.850 | 0.627 | 0.862 | 0.704 |
| 3440 | 0.595 | 0.959 | 0.850 | 0.627 | 0.862 | 0.704 |
| 3450 | 0.595 | 0.959 | 0.850 | 0.627 | 0.862 | 0.704 |
| 3460 | 0.595 | 0.959 | 0.850 | 0.627 | 0.862 | 0.704 |
| 3470 | 0.595 | 0.959 | 0.850 | 0.627 | 0.862 | 0.704 |
| 3480 | 0.595 | 0.959 | 0.850 | 0.627 | 0.862 | 0.704 |
| 3490 | 0.595 | 0.959 | 0.850 | 0.627 | 0.862 | 0.704 |
| 3500 | 0.595 | 0.959 | 0.850 | 0.627 | 0.862 | 0.704 |
| 3510 | 0.595 | 0.959 | 0.850 | 0.627 | 0.862 | 0.704 |
| 3520 | 0.595 | 0.959 | 0.850 | 0.627 | 0.862 | 0.704 |
| 3530 | 0.595 | 0.959 | 0.850 | 0.627 | 0.862 | 0.704 |
| 3540 | 0.595 | 0.959 | 0.850 | 0.627 | 0.862 | 0.704 |
| 3550 | 0.595 | 0.959 | 0.850 | 0.627 | 0.862 | 0.704 |
| 3560 | 0.595 | 0.959 | 0.850 | 0.627 | 0.862 | 0.704 |
| 3570 | 0.595 | 0.959 | 0.850 | 0.627 | 0.862 | 0.704 |
| 3580 | 0.595 | 0.959 | 0.850 | 0.627 | 0.862 | 0.704 |
| 3590 | 0.595 | 0.959 | 0.850 | 0.627 | 0.862 | 0.704 |
| 3600 | 0.595 | 0.959 | 0.850 | 0.627 | 0.862 | 0.704 |
| 3610 | 0.571 | 0.959 | 0.843 | 0.608 | 0.857 | 0.686 |
| 3620 | 0.571 | 0.959 | 0.843 | 0.608 | 0.857 | 0.686 |
| 3630 | 0.571 | 0.959 | 0.843 | 0.608 | 0.857 | 0.686 |
| 3640 | 0.595 | 0.959 | 0.850 | 0.627 | 0.862 | 0.704 |
| 3650 | 0.571 | 0.959 | 0.843 | 0.608 | 0.857 | 0.686 |
| 3660 | 0.571 | 0.959 | 0.843 | 0.608 | 0.857 | 0.686 |
| 3670 | 0.571 | 0.959 | 0.843 | 0.608 | 0.857 | 0.686 |
| 3680 | 0.595 | 0.959 | 0.850 | 0.627 | 0.862 | 0.704 |
| 3690 | 0.595 | 0.959 | 0.850 | 0.627 | 0.862 | 0.704 |
| 3700 | 0.595 | 0.959 | 0.850 | 0.627 | 0.862 | 0.704 |

|      |       |       |       |       |       |       |
|------|-------|-------|-------|-------|-------|-------|
| 3710 | 0.595 | 0.959 | 0.850 | 0.627 | 0.862 | 0.704 |
| 3720 | 0.595 | 0.959 | 0.850 | 0.627 | 0.862 | 0.704 |
| 3730 | 0.595 | 0.959 | 0.850 | 0.627 | 0.862 | 0.704 |
| 3740 | 0.595 | 0.959 | 0.850 | 0.627 | 0.862 | 0.704 |
| 3750 | 0.595 | 0.949 | 0.843 | 0.608 | 0.833 | 0.694 |
| 3760 | 0.595 | 0.949 | 0.843 | 0.608 | 0.833 | 0.694 |
| 3770 | 0.595 | 0.949 | 0.843 | 0.608 | 0.833 | 0.694 |
| 3780 | 0.595 | 0.949 | 0.843 | 0.608 | 0.833 | 0.694 |
| 3790 | 0.595 | 0.949 | 0.843 | 0.608 | 0.833 | 0.694 |
| 3800 | 0.595 | 0.949 | 0.843 | 0.608 | 0.833 | 0.694 |
| 3810 | 0.595 | 0.949 | 0.843 | 0.608 | 0.833 | 0.694 |
| 3820 | 0.595 | 0.949 | 0.843 | 0.608 | 0.833 | 0.694 |
| 3830 | 0.595 | 0.949 | 0.843 | 0.608 | 0.833 | 0.694 |
| 3840 | 0.595 | 0.949 | 0.843 | 0.608 | 0.833 | 0.694 |
| 3850 | 0.595 | 0.949 | 0.843 | 0.608 | 0.833 | 0.694 |
| 3860 | 0.595 | 0.949 | 0.843 | 0.608 | 0.833 | 0.694 |
| 3870 | 0.595 | 0.949 | 0.843 | 0.608 | 0.833 | 0.694 |
| 3880 | 0.595 | 0.949 | 0.843 | 0.608 | 0.833 | 0.694 |
| 3890 | 0.595 | 0.949 | 0.843 | 0.608 | 0.833 | 0.694 |
| 3900 | 0.595 | 0.949 | 0.843 | 0.608 | 0.833 | 0.694 |
| 3910 | 0.595 | 0.949 | 0.843 | 0.608 | 0.833 | 0.694 |
| 3920 | 0.595 | 0.949 | 0.843 | 0.608 | 0.833 | 0.694 |
| 3930 | 0.595 | 0.949 | 0.843 | 0.608 | 0.833 | 0.694 |
| 3940 | 0.595 | 0.949 | 0.843 | 0.608 | 0.833 | 0.694 |
| 3950 | 0.595 | 0.949 | 0.843 | 0.608 | 0.833 | 0.694 |
| 3960 | 0.595 | 0.949 | 0.843 | 0.608 | 0.833 | 0.694 |
| 3970 | 0.595 | 0.949 | 0.843 | 0.608 | 0.833 | 0.694 |
| 3980 | 0.595 | 0.949 | 0.843 | 0.608 | 0.833 | 0.694 |
| 3990 | 0.595 | 0.949 | 0.843 | 0.608 | 0.833 | 0.694 |
| 4000 | 0.595 | 0.949 | 0.843 | 0.608 | 0.833 | 0.694 |
| 4010 | 0.595 | 0.949 | 0.843 | 0.608 | 0.833 | 0.694 |
| 4020 | 0.595 | 0.949 | 0.843 | 0.608 | 0.833 | 0.694 |
| 4030 | 0.595 | 0.949 | 0.843 | 0.608 | 0.833 | 0.694 |
| 4040 | 0.595 | 0.949 | 0.843 | 0.608 | 0.833 | 0.694 |
| 4050 | 0.595 | 0.949 | 0.843 | 0.608 | 0.833 | 0.694 |
| 4060 | 0.595 | 0.949 | 0.843 | 0.608 | 0.833 | 0.694 |
| 4070 | 0.595 | 0.949 | 0.843 | 0.608 | 0.833 | 0.694 |
| 4080 | 0.571 | 0.949 | 0.836 | 0.588 | 0.828 | 0.676 |
| 4090 | 0.548 | 0.949 | 0.829 | 0.569 | 0.821 | 0.657 |
| 4100 | 0.548 | 0.949 | 0.829 | 0.569 | 0.821 | 0.657 |
| 4110 | 0.548 | 0.949 | 0.829 | 0.569 | 0.821 | 0.657 |
| 4120 | 0.548 | 0.949 | 0.829 | 0.569 | 0.821 | 0.657 |
| 4130 | 0.548 | 0.949 | 0.829 | 0.569 | 0.821 | 0.657 |
| 4140 | 0.548 | 0.949 | 0.829 | 0.569 | 0.821 | 0.657 |
| 4150 | 0.548 | 0.949 | 0.829 | 0.569 | 0.821 | 0.657 |
| 4160 | 0.548 | 0.949 | 0.829 | 0.569 | 0.821 | 0.657 |
| 4170 | 0.548 | 0.949 | 0.829 | 0.569 | 0.821 | 0.657 |
| 4180 | 0.548 | 0.949 | 0.829 | 0.569 | 0.821 | 0.657 |
| 4190 | 0.548 | 0.949 | 0.829 | 0.569 | 0.821 | 0.657 |
| 4200 | 0.548 | 0.949 | 0.829 | 0.569 | 0.821 | 0.657 |
| 4210 | 0.548 | 0.949 | 0.829 | 0.569 | 0.821 | 0.657 |
| 4220 | 0.548 | 0.949 | 0.829 | 0.569 | 0.821 | 0.657 |
| 4230 | 0.548 | 0.949 | 0.829 | 0.569 | 0.821 | 0.657 |

[illegible]

[illegible]

[illegible]

|      |       |       |       |       |       |       |
|------|-------|-------|-------|-------|-------|-------|
| 5830 | 0.500 | 0.949 | 0.814 | 0.529 | 0.808 | 0.618 |
| 5840 | 0.524 | 0.949 | 0.821 | 0.549 | 0.815 | 0.638 |
| 5850 | 0.500 | 0.949 | 0.814 | 0.529 | 0.808 | 0.618 |
| 5860 | 0.500 | 0.949 | 0.814 | 0.529 | 0.808 | 0.618 |
| 5870 | 0.500 | 0.949 | 0.814 | 0.529 | 0.808 | 0.618 |
| 5880 | 0.500 | 0.949 | 0.814 | 0.529 | 0.808 | 0.618 |
| 5890 | 0.500 | 0.949 | 0.814 | 0.529 | 0.808 | 0.618 |
| 5900 | 0.500 | 0.949 | 0.814 | 0.529 | 0.808 | 0.618 |
| 5910 | 0.500 | 0.949 | 0.814 | 0.529 | 0.808 | 0.618 |
| 5920 | 0.500 | 0.949 | 0.814 | 0.529 | 0.808 | 0.618 |
| 5930 | 0.500 | 0.949 | 0.814 | 0.529 | 0.808 | 0.618 |
| 5940 | 0.500 | 0.949 | 0.814 | 0.529 | 0.808 | 0.618 |
| 5950 | 0.500 | 0.949 | 0.814 | 0.529 | 0.808 | 0.618 |
| 5960 | 0.500 | 0.949 | 0.814 | 0.529 | 0.808 | 0.618 |
| 5970 | 0.500 | 0.949 | 0.814 | 0.529 | 0.808 | 0.618 |
| 5980 | 0.500 | 0.949 | 0.814 | 0.529 | 0.808 | 0.618 |
| 5990 | 0.500 | 0.949 | 0.814 | 0.529 | 0.808 | 0.618 |
| 6000 | 0.500 | 0.949 | 0.814 | 0.529 | 0.808 | 0.618 |
| 6010 | 0.500 | 0.949 | 0.814 | 0.529 | 0.808 | 0.618 |
| 6020 | 0.500 | 0.949 | 0.814 | 0.529 | 0.808 | 0.618 |
| 6030 | 0.500 | 0.949 | 0.814 | 0.529 | 0.808 | 0.618 |
| 6040 | 0.500 | 0.949 | 0.814 | 0.529 | 0.808 | 0.618 |
| 6050 | 0.500 | 0.949 | 0.814 | 0.529 | 0.808 | 0.618 |
| 6060 | 0.500 | 0.949 | 0.814 | 0.529 | 0.808 | 0.618 |
| 6070 | 0.500 | 0.949 | 0.814 | 0.529 | 0.808 | 0.618 |
| 6080 | 0.500 | 0.949 | 0.814 | 0.529 | 0.808 | 0.618 |
| 6090 | 0.500 | 0.949 | 0.814 | 0.529 | 0.808 | 0.618 |
| 6100 | 0.500 | 0.949 | 0.814 | 0.529 | 0.808 | 0.618 |
| 6110 | 0.500 | 0.949 | 0.814 | 0.529 | 0.808 | 0.618 |
| 6120 | 0.500 | 0.949 | 0.814 | 0.529 | 0.808 | 0.618 |
| 6130 | 0.500 | 0.949 | 0.814 | 0.529 | 0.808 | 0.618 |
| 6140 | 0.500 | 0.949 | 0.814 | 0.529 | 0.808 | 0.618 |
| 6150 | 0.500 | 0.949 | 0.814 | 0.529 | 0.808 | 0.618 |
| 6160 | 0.500 | 0.949 | 0.814 | 0.529 | 0.808 | 0.618 |
| 6170 | 0.500 | 0.949 | 0.814 | 0.529 | 0.808 | 0.618 |
| 6180 | 0.500 | 0.949 | 0.814 | 0.529 | 0.808 | 0.618 |
| 6190 | 0.500 | 0.949 | 0.814 | 0.529 | 0.808 | 0.618 |
| 6200 | 0.500 | 0.949 | 0.814 | 0.529 | 0.808 | 0.618 |
| 6210 | 0.500 | 0.949 | 0.814 | 0.529 | 0.808 | 0.618 |
| 6220 | 0.500 | 0.949 | 0.814 | 0.529 | 0.808 | 0.618 |
| 6230 | 0.500 | 0.949 | 0.814 | 0.529 | 0.808 | 0.618 |
| 6240 | 0.500 | 0.939 | 0.807 | 0.510 | 0.778 | 0.609 |
| 6250 | 0.500 | 0.939 | 0.807 | 0.510 | 0.778 | 0.609 |
| 6260 | 0.500 | 0.939 | 0.807 | 0.510 | 0.778 | 0.609 |
| 6270 | 0.500 | 0.939 | 0.807 | 0.510 | 0.778 | 0.609 |
| 6280 | 0.500 | 0.939 | 0.807 | 0.510 | 0.778 | 0.609 |
| 6290 | 0.500 | 0.939 | 0.807 | 0.510 | 0.778 | 0.609 |
| 6300 | 0.500 | 0.939 | 0.807 | 0.510 | 0.778 | 0.609 |
| 6310 | 0.500 | 0.939 | 0.807 | 0.510 | 0.778 | 0.609 |
| 6320 | 0.476 | 0.939 | 0.800 | 0.489 | 0.769 | 0.588 |
| 6330 | 0.476 | 0.939 | 0.800 | 0.489 | 0.769 | 0.588 |
| 6340 | 0.476 | 0.939 | 0.800 | 0.489 | 0.769 | 0.588 |
| 6350 | 0.476 | 0.939 | 0.800 | 0.489 | 0.769 | 0.588 |

|      |       |       |       |       |       |       |
|------|-------|-------|-------|-------|-------|-------|
| 6360 | 0.476 | 0.939 | 0.800 | 0.489 | 0.769 | 0.588 |
| 6370 | 0.476 | 0.939 | 0.800 | 0.489 | 0.769 | 0.588 |
| 6380 | 0.476 | 0.939 | 0.800 | 0.489 | 0.769 | 0.588 |
| 6390 | 0.500 | 0.939 | 0.807 | 0.510 | 0.778 | 0.609 |
| 6400 | 0.500 | 0.939 | 0.807 | 0.510 | 0.778 | 0.609 |
| 6410 | 0.500 | 0.939 | 0.807 | 0.510 | 0.778 | 0.609 |
| 6420 | 0.500 | 0.939 | 0.807 | 0.510 | 0.778 | 0.609 |
| 6430 | 0.500 | 0.949 | 0.814 | 0.529 | 0.808 | 0.618 |
| 6440 | 0.500 | 0.949 | 0.814 | 0.529 | 0.808 | 0.618 |
| 6450 | 0.500 | 0.949 | 0.814 | 0.529 | 0.808 | 0.618 |
| 6460 | 0.500 | 0.939 | 0.807 | 0.510 | 0.778 | 0.609 |
| 6470 | 0.500 | 0.949 | 0.814 | 0.529 | 0.808 | 0.618 |
| 6480 | 0.500 | 0.949 | 0.814 | 0.529 | 0.808 | 0.618 |
| 6490 | 0.500 | 0.949 | 0.814 | 0.529 | 0.808 | 0.618 |
| 6500 | 0.500 | 0.949 | 0.814 | 0.529 | 0.808 | 0.618 |
| 6510 | 0.524 | 0.949 | 0.821 | 0.549 | 0.815 | 0.638 |
| 6520 | 0.524 | 0.949 | 0.821 | 0.549 | 0.815 | 0.638 |
| 6530 | 0.524 | 0.949 | 0.821 | 0.549 | 0.815 | 0.638 |
| 6540 | 0.500 | 0.939 | 0.807 | 0.510 | 0.778 | 0.609 |
| 6550 | 0.476 | 0.939 | 0.800 | 0.489 | 0.769 | 0.588 |
| 6560 | 0.476 | 0.939 | 0.800 | 0.489 | 0.769 | 0.588 |
| 6570 | 0.476 | 0.939 | 0.800 | 0.489 | 0.769 | 0.588 |
| 6580 | 0.476 | 0.939 | 0.800 | 0.489 | 0.769 | 0.588 |
| 6590 | 0.500 | 0.939 | 0.807 | 0.510 | 0.778 | 0.609 |
| 6600 | 0.500 | 0.939 | 0.807 | 0.510 | 0.778 | 0.609 |
| 6610 | 0.500 | 0.939 | 0.807 | 0.510 | 0.778 | 0.609 |
| 6620 | 0.500 | 0.939 | 0.807 | 0.510 | 0.778 | 0.609 |
| 6630 | 0.500 | 0.939 | 0.807 | 0.510 | 0.778 | 0.609 |
| 6640 | 0.500 | 0.949 | 0.814 | 0.529 | 0.808 | 0.618 |
| 6650 | 0.500 | 0.949 | 0.814 | 0.529 | 0.808 | 0.618 |
| 6660 | 0.500 | 0.949 | 0.814 | 0.529 | 0.808 | 0.618 |
| 6670 | 0.500 | 0.949 | 0.814 | 0.529 | 0.808 | 0.618 |
| 6680 | 0.500 | 0.949 | 0.814 | 0.529 | 0.808 | 0.618 |
| 6690 | 0.500 | 0.949 | 0.814 | 0.529 | 0.808 | 0.618 |
| 6700 | 0.500 | 0.949 | 0.814 | 0.529 | 0.808 | 0.618 |
| 6710 | 0.500 | 0.949 | 0.814 | 0.529 | 0.808 | 0.618 |
| 6720 | 0.500 | 0.949 | 0.814 | 0.529 | 0.808 | 0.618 |
| 6730 | 0.500 | 0.949 | 0.814 | 0.529 | 0.808 | 0.618 |
| 6740 | 0.500 | 0.949 | 0.814 | 0.529 | 0.808 | 0.618 |
| 6750 | 0.500 | 0.949 | 0.814 | 0.529 | 0.808 | 0.618 |
| 6760 | 0.500 | 0.949 | 0.814 | 0.529 | 0.808 | 0.618 |
| 6770 | 0.500 | 0.939 | 0.807 | 0.510 | 0.778 | 0.609 |
| 6780 | 0.500 | 0.949 | 0.814 | 0.529 | 0.808 | 0.618 |
| 6790 | 0.500 | 0.949 | 0.814 | 0.529 | 0.808 | 0.618 |
| 6800 | 0.500 | 0.949 | 0.814 | 0.529 | 0.808 | 0.618 |
| 6810 | 0.500 | 0.949 | 0.814 | 0.529 | 0.808 | 0.618 |
| 6820 | 0.500 | 0.949 | 0.814 | 0.529 | 0.808 | 0.618 |
| 6830 | 0.500 | 0.949 | 0.814 | 0.529 | 0.808 | 0.618 |
| 6840 | 0.500 | 0.949 | 0.814 | 0.529 | 0.808 | 0.618 |
| 6850 | 0.500 | 0.949 | 0.814 | 0.529 | 0.808 | 0.618 |
| 6860 | 0.500 | 0.949 | 0.814 | 0.529 | 0.808 | 0.618 |
| 6870 | 0.500 | 0.949 | 0.814 | 0.529 | 0.808 | 0.618 |
| 6880 | 0.500 | 0.949 | 0.814 | 0.529 | 0.808 | 0.618 |

|      |       |       |       |       |       |       |
|------|-------|-------|-------|-------|-------|-------|
| 6890 | 0.500 | 0.949 | 0.814 | 0.529 | 0.808 | 0.618 |
| 6900 | 0.500 | 0.939 | 0.807 | 0.510 | 0.778 | 0.609 |
| 6910 | 0.500 | 0.939 | 0.807 | 0.510 | 0.778 | 0.609 |
| 6920 | 0.500 | 0.939 | 0.807 | 0.510 | 0.778 | 0.609 |
| 6930 | 0.500 | 0.939 | 0.807 | 0.510 | 0.778 | 0.609 |
| 6940 | 0.500 | 0.949 | 0.814 | 0.529 | 0.808 | 0.618 |
| 6950 | 0.500 | 0.949 | 0.814 | 0.529 | 0.808 | 0.618 |
| 6960 | 0.500 | 0.949 | 0.814 | 0.529 | 0.808 | 0.618 |
| 6970 | 0.500 | 0.949 | 0.814 | 0.529 | 0.808 | 0.618 |
| 6980 | 0.500 | 0.949 | 0.814 | 0.529 | 0.808 | 0.618 |
| 6990 | 0.500 | 0.949 | 0.814 | 0.529 | 0.808 | 0.618 |
| 7000 | 0.500 | 0.949 | 0.814 | 0.529 | 0.808 | 0.618 |
| 7010 | 0.500 | 0.949 | 0.814 | 0.529 | 0.808 | 0.618 |
| 7020 | 0.476 | 0.949 | 0.807 | 0.509 | 0.800 | 0.597 |
| 7030 | 0.476 | 0.949 | 0.807 | 0.509 | 0.800 | 0.597 |
| 7040 | 0.476 | 0.949 | 0.807 | 0.509 | 0.800 | 0.597 |
| 7050 | 0.476 | 0.949 | 0.807 | 0.509 | 0.800 | 0.597 |
| 7060 | 0.476 | 0.939 | 0.800 | 0.489 | 0.769 | 0.588 |
| 7070 | 0.476 | 0.939 | 0.800 | 0.489 | 0.769 | 0.588 |
| 7080 | 0.476 | 0.939 | 0.800 | 0.489 | 0.769 | 0.588 |
| 7090 | 0.476 | 0.939 | 0.800 | 0.489 | 0.769 | 0.588 |
| 7100 | 0.476 | 0.939 | 0.800 | 0.489 | 0.769 | 0.588 |
| 7110 | 0.476 | 0.949 | 0.807 | 0.509 | 0.800 | 0.597 |
| 7120 | 0.452 | 0.949 | 0.800 | 0.488 | 0.792 | 0.576 |
| 7130 | 0.452 | 0.949 | 0.800 | 0.488 | 0.792 | 0.576 |
| 7140 | 0.452 | 0.939 | 0.793 | 0.468 | 0.760 | 0.567 |
| 7150 | 0.452 | 0.939 | 0.793 | 0.468 | 0.760 | 0.567 |
| 7160 | 0.452 | 0.939 | 0.793 | 0.468 | 0.760 | 0.567 |
| 7170 | 0.452 | 0.929 | 0.786 | 0.449 | 0.731 | 0.559 |
| 7180 | 0.452 | 0.929 | 0.786 | 0.449 | 0.731 | 0.559 |
| 7190 | 0.452 | 0.929 | 0.786 | 0.449 | 0.731 | 0.559 |
| 7200 | 0.452 | 0.929 | 0.786 | 0.449 | 0.731 | 0.559 |
| 7210 | 0.452 | 0.929 | 0.786 | 0.449 | 0.731 | 0.559 |
| 7220 | 0.452 | 0.929 | 0.786 | 0.449 | 0.731 | 0.559 |
| 7230 | 0.476 | 0.929 | 0.793 | 0.470 | 0.741 | 0.580 |
| 7240 | 0.476 | 0.929 | 0.793 | 0.470 | 0.741 | 0.580 |
| 7250 | 0.476 | 0.929 | 0.793 | 0.470 | 0.741 | 0.580 |
| 7260 | 0.476 | 0.929 | 0.793 | 0.470 | 0.741 | 0.580 |
| 7270 | 0.476 | 0.929 | 0.793 | 0.470 | 0.741 | 0.580 |
| 7280 | 0.476 | 0.929 | 0.793 | 0.470 | 0.741 | 0.580 |
| 7290 | 0.476 | 0.929 | 0.793 | 0.470 | 0.741 | 0.580 |
| 7300 | 0.476 | 0.929 | 0.793 | 0.470 | 0.741 | 0.580 |
| 7310 | 0.476 | 0.929 | 0.793 | 0.470 | 0.741 | 0.580 |
| 7320 | 0.476 | 0.929 | 0.793 | 0.470 | 0.741 | 0.580 |
| 7330 | 0.476 | 0.929 | 0.793 | 0.470 | 0.741 | 0.580 |
| 7340 | 0.476 | 0.929 | 0.793 | 0.470 | 0.741 | 0.580 |
| 7350 | 0.476 | 0.929 | 0.793 | 0.470 | 0.741 | 0.580 |
| 7360 | 0.476 | 0.929 | 0.793 | 0.470 | 0.741 | 0.580 |
| 7370 | 0.476 | 0.929 | 0.793 | 0.470 | 0.741 | 0.580 |
| 7380 | 0.452 | 0.929 | 0.786 | 0.449 | 0.731 | 0.559 |
| 7390 | 0.452 | 0.929 | 0.786 | 0.449 | 0.731 | 0.559 |
| 7400 | 0.452 | 0.929 | 0.786 | 0.449 | 0.731 | 0.559 |
| 7410 | 0.452 | 0.929 | 0.786 | 0.449 | 0.731 | 0.559 |

[illegible]

|      |       |       |       |       |       |       |
|------|-------|-------|-------|-------|-------|-------|
| 7950 | 0.452 | 0.918 | 0.779 | 0.431 | 0.704 | 0.551 |
| 7960 | 0.452 | 0.918 | 0.779 | 0.431 | 0.704 | 0.551 |
| 7970 | 0.452 | 0.918 | 0.779 | 0.431 | 0.704 | 0.551 |
| 7980 | 0.452 | 0.918 | 0.779 | 0.431 | 0.704 | 0.551 |
| 7990 | 0.452 | 0.918 | 0.779 | 0.431 | 0.704 | 0.551 |
| 8000 | 0.452 | 0.918 | 0.779 | 0.431 | 0.704 | 0.551 |
| 8010 | 0.452 | 0.918 | 0.779 | 0.431 | 0.704 | 0.551 |
| 8020 | 0.452 | 0.918 | 0.779 | 0.431 | 0.704 | 0.551 |
| 8030 | 0.452 | 0.918 | 0.779 | 0.431 | 0.704 | 0.551 |
| 8040 | 0.452 | 0.918 | 0.779 | 0.431 | 0.704 | 0.551 |
| 8050 | 0.452 | 0.918 | 0.779 | 0.431 | 0.704 | 0.551 |
| 8060 | 0.452 | 0.918 | 0.779 | 0.431 | 0.704 | 0.551 |
| 8070 | 0.452 | 0.918 | 0.779 | 0.431 | 0.704 | 0.551 |
| 8080 | 0.452 | 0.908 | 0.771 | 0.413 | 0.679 | 0.543 |
| 8090 | 0.452 | 0.918 | 0.779 | 0.431 | 0.704 | 0.551 |
| 8100 | 0.452 | 0.918 | 0.779 | 0.431 | 0.704 | 0.551 |
| 8110 | 0.452 | 0.918 | 0.779 | 0.431 | 0.704 | 0.551 |
| 8120 | 0.452 | 0.918 | 0.779 | 0.431 | 0.704 | 0.551 |
| 8130 | 0.452 | 0.918 | 0.779 | 0.431 | 0.704 | 0.551 |
| 8140 | 0.452 | 0.918 | 0.779 | 0.431 | 0.704 | 0.551 |
| 8150 | 0.452 | 0.908 | 0.771 | 0.413 | 0.679 | 0.543 |
| 8160 | 0.452 | 0.918 | 0.779 | 0.431 | 0.704 | 0.551 |
| 8170 | 0.452 | 0.908 | 0.771 | 0.413 | 0.679 | 0.543 |
| 8180 | 0.452 | 0.898 | 0.764 | 0.396 | 0.655 | 0.535 |
| 8190 | 0.452 | 0.898 | 0.764 | 0.396 | 0.655 | 0.535 |
| 8200 | 0.452 | 0.898 | 0.764 | 0.396 | 0.655 | 0.535 |
| 8210 | 0.452 | 0.898 | 0.764 | 0.396 | 0.655 | 0.535 |
| 8220 | 0.452 | 0.898 | 0.764 | 0.396 | 0.655 | 0.535 |
| 8230 | 0.452 | 0.898 | 0.764 | 0.396 | 0.655 | 0.535 |
| 8240 | 0.452 | 0.898 | 0.764 | 0.396 | 0.655 | 0.535 |
| 8250 | 0.452 | 0.898 | 0.764 | 0.396 | 0.655 | 0.535 |
| 8260 | 0.452 | 0.898 | 0.764 | 0.396 | 0.655 | 0.535 |
| 8270 | 0.452 | 0.898 | 0.764 | 0.396 | 0.655 | 0.535 |
| 8280 | 0.452 | 0.898 | 0.764 | 0.396 | 0.655 | 0.535 |
| 8290 | 0.452 | 0.898 | 0.764 | 0.396 | 0.655 | 0.535 |
| 8300 | 0.452 | 0.898 | 0.764 | 0.396 | 0.655 | 0.535 |
| 8310 | 0.452 | 0.898 | 0.764 | 0.396 | 0.655 | 0.535 |
| 8320 | 0.452 | 0.898 | 0.764 | 0.396 | 0.655 | 0.535 |
| 8330 | 0.452 | 0.898 | 0.764 | 0.396 | 0.655 | 0.535 |
| 8340 | 0.452 | 0.898 | 0.764 | 0.396 | 0.655 | 0.535 |
| 8350 | 0.452 | 0.898 | 0.764 | 0.396 | 0.655 | 0.535 |
| 8360 | 0.452 | 0.898 | 0.764 | 0.396 | 0.655 | 0.535 |
| 8370 | 0.452 | 0.898 | 0.764 | 0.396 | 0.655 | 0.535 |
| 8380 | 0.452 | 0.898 | 0.764 | 0.396 | 0.655 | 0.535 |
| 8390 | 0.452 | 0.898 | 0.764 | 0.396 | 0.655 | 0.535 |
| 8400 | 0.452 | 0.898 | 0.764 | 0.396 | 0.655 | 0.535 |
| 8410 | 0.452 | 0.898 | 0.764 | 0.396 | 0.655 | 0.535 |
| 8420 | 0.452 | 0.898 | 0.764 | 0.396 | 0.655 | 0.535 |
| 8430 | 0.452 | 0.908 | 0.771 | 0.413 | 0.679 | 0.543 |
| 8440 | 0.452 | 0.908 | 0.771 | 0.413 | 0.679 | 0.543 |
| 8450 | 0.452 | 0.908 | 0.771 | 0.413 | 0.679 | 0.543 |
| 8460 | 0.452 | 0.908 | 0.771 | 0.413 | 0.679 | 0.543 |
| 8470 | 0.452 | 0.908 | 0.771 | 0.413 | 0.679 | 0.543 |

|      |       |       |       |       |       |       |
|------|-------|-------|-------|-------|-------|-------|
| 8480 | 0.452 | 0.908 | 0.771 | 0.413 | 0.679 | 0.543 |
| 8490 | 0.452 | 0.908 | 0.771 | 0.413 | 0.679 | 0.543 |
| 8500 | 0.452 | 0.908 | 0.771 | 0.413 | 0.679 | 0.543 |
| 8510 | 0.452 | 0.908 | 0.771 | 0.413 | 0.679 | 0.543 |
| 8520 | 0.452 | 0.908 | 0.771 | 0.413 | 0.679 | 0.543 |
| 8530 | 0.452 | 0.908 | 0.771 | 0.413 | 0.679 | 0.543 |
| 8540 | 0.452 | 0.908 | 0.771 | 0.413 | 0.679 | 0.543 |
| 8550 | 0.452 | 0.908 | 0.771 | 0.413 | 0.679 | 0.543 |
| 8560 | 0.452 | 0.908 | 0.771 | 0.413 | 0.679 | 0.543 |
| 8570 | 0.452 | 0.908 | 0.771 | 0.413 | 0.679 | 0.543 |
| 8580 | 0.452 | 0.908 | 0.771 | 0.413 | 0.679 | 0.543 |
| 8590 | 0.452 | 0.908 | 0.771 | 0.413 | 0.679 | 0.543 |
| 8600 | 0.452 | 0.908 | 0.771 | 0.413 | 0.679 | 0.543 |
| 8610 | 0.452 | 0.898 | 0.764 | 0.396 | 0.655 | 0.535 |
| 8620 | 0.452 | 0.918 | 0.779 | 0.431 | 0.704 | 0.551 |
| 8630 | 0.452 | 0.918 | 0.779 | 0.431 | 0.704 | 0.551 |
| 8640 | 0.452 | 0.908 | 0.771 | 0.413 | 0.679 | 0.543 |
| 8650 | 0.452 | 0.908 | 0.771 | 0.413 | 0.679 | 0.543 |
| 8660 | 0.452 | 0.918 | 0.779 | 0.431 | 0.704 | 0.551 |
| 8670 | 0.452 | 0.918 | 0.779 | 0.431 | 0.704 | 0.551 |
| 8680 | 0.452 | 0.908 | 0.771 | 0.413 | 0.679 | 0.543 |
| 8690 | 0.452 | 0.908 | 0.771 | 0.413 | 0.679 | 0.543 |
| 8700 | 0.452 | 0.908 | 0.771 | 0.413 | 0.679 | 0.543 |
| 8710 | 0.452 | 0.898 | 0.764 | 0.396 | 0.655 | 0.535 |
| 8720 | 0.452 | 0.898 | 0.764 | 0.396 | 0.655 | 0.535 |
| 8730 | 0.452 | 0.898 | 0.764 | 0.396 | 0.655 | 0.535 |
| 8740 | 0.452 | 0.898 | 0.764 | 0.396 | 0.655 | 0.535 |
| 8750 | 0.452 | 0.898 | 0.764 | 0.396 | 0.655 | 0.535 |
| 8760 | 0.452 | 0.898 | 0.764 | 0.396 | 0.655 | 0.535 |
| 8770 | 0.452 | 0.908 | 0.771 | 0.413 | 0.679 | 0.543 |
| 8780 | 0.452 | 0.908 | 0.771 | 0.413 | 0.679 | 0.543 |
| 8790 | 0.452 | 0.908 | 0.771 | 0.413 | 0.679 | 0.543 |
| 8800 | 0.452 | 0.908 | 0.771 | 0.413 | 0.679 | 0.543 |
| 8810 | 0.452 | 0.908 | 0.771 | 0.413 | 0.679 | 0.543 |
| 8820 | 0.452 | 0.908 | 0.771 | 0.413 | 0.679 | 0.543 |
| 8830 | 0.452 | 0.908 | 0.771 | 0.413 | 0.679 | 0.543 |
| 8840 | 0.452 | 0.908 | 0.771 | 0.413 | 0.679 | 0.543 |
| 8850 | 0.452 | 0.908 | 0.771 | 0.413 | 0.679 | 0.543 |
| 8860 | 0.452 | 0.908 | 0.771 | 0.413 | 0.679 | 0.543 |
| 8870 | 0.452 | 0.908 | 0.771 | 0.413 | 0.679 | 0.543 |
| 8880 | 0.452 | 0.918 | 0.779 | 0.431 | 0.704 | 0.551 |
| 8890 | 0.452 | 0.908 | 0.771 | 0.413 | 0.679 | 0.543 |
| 8900 | 0.452 | 0.918 | 0.779 | 0.431 | 0.704 | 0.551 |
| 8910 | 0.452 | 0.918 | 0.779 | 0.431 | 0.704 | 0.551 |
| 8920 | 0.452 | 0.908 | 0.771 | 0.413 | 0.679 | 0.543 |
| 8930 | 0.452 | 0.908 | 0.771 | 0.413 | 0.679 | 0.543 |
| 8940 | 0.452 | 0.908 | 0.771 | 0.413 | 0.679 | 0.543 |
| 8950 | 0.452 | 0.908 | 0.771 | 0.413 | 0.679 | 0.543 |
| 8960 | 0.452 | 0.908 | 0.771 | 0.413 | 0.679 | 0.543 |
| 8970 | 0.452 | 0.908 | 0.771 | 0.413 | 0.679 | 0.543 |
| 8980 | 0.452 | 0.908 | 0.771 | 0.413 | 0.679 | 0.543 |
| 8990 | 0.452 | 0.908 | 0.771 | 0.413 | 0.679 | 0.543 |
| 9000 | 0.452 | 0.908 | 0.771 | 0.413 | 0.679 | 0.543 |

|      |       |       |       |       |       |       |
|------|-------|-------|-------|-------|-------|-------|
| 9010 | 0.452 | 0.908 | 0.771 | 0.413 | 0.679 | 0.543 |
| 9020 | 0.452 | 0.908 | 0.771 | 0.413 | 0.679 | 0.543 |
| 9030 | 0.452 | 0.898 | 0.764 | 0.396 | 0.655 | 0.535 |
| 9040 | 0.452 | 0.898 | 0.764 | 0.396 | 0.655 | 0.535 |
| 9050 | 0.452 | 0.898 | 0.764 | 0.396 | 0.655 | 0.535 |
| 9060 | 0.452 | 0.898 | 0.764 | 0.396 | 0.655 | 0.535 |
| 9070 | 0.429 | 0.898 | 0.757 | 0.374 | 0.643 | 0.514 |
| 9080 | 0.429 | 0.908 | 0.764 | 0.391 | 0.667 | 0.522 |
| 9090 | 0.429 | 0.908 | 0.764 | 0.391 | 0.667 | 0.522 |
| 9100 | 0.429 | 0.908 | 0.764 | 0.391 | 0.667 | 0.522 |
| 9110 | 0.429 | 0.908 | 0.764 | 0.391 | 0.667 | 0.522 |
| 9120 | 0.452 | 0.908 | 0.771 | 0.413 | 0.679 | 0.543 |
| 9130 | 0.452 | 0.908 | 0.771 | 0.413 | 0.679 | 0.543 |
| 9140 | 0.452 | 0.908 | 0.771 | 0.413 | 0.679 | 0.543 |
| 9150 | 0.452 | 0.908 | 0.771 | 0.413 | 0.679 | 0.543 |
| 9160 | 0.452 | 0.898 | 0.764 | 0.396 | 0.655 | 0.535 |
| 9170 | 0.429 | 0.898 | 0.757 | 0.374 | 0.643 | 0.514 |
| 9180 | 0.429 | 0.898 | 0.757 | 0.374 | 0.643 | 0.514 |
| 9190 | 0.452 | 0.898 | 0.764 | 0.396 | 0.655 | 0.535 |
| 9200 | 0.452 | 0.898 | 0.764 | 0.396 | 0.655 | 0.535 |
| 9210 | 0.452 | 0.898 | 0.764 | 0.396 | 0.655 | 0.535 |
| 9220 | 0.452 | 0.898 | 0.764 | 0.396 | 0.655 | 0.535 |
| 9230 | 0.429 | 0.898 | 0.757 | 0.374 | 0.643 | 0.514 |
| 9240 | 0.429 | 0.908 | 0.764 | 0.391 | 0.667 | 0.522 |
| 9250 | 0.429 | 0.908 | 0.764 | 0.391 | 0.667 | 0.522 |
| 9260 | 0.429 | 0.908 | 0.764 | 0.391 | 0.667 | 0.522 |
| 9270 | 0.429 | 0.908 | 0.764 | 0.391 | 0.667 | 0.522 |
| 9280 | 0.429 | 0.908 | 0.764 | 0.391 | 0.667 | 0.522 |
| 9290 | 0.429 | 0.908 | 0.764 | 0.391 | 0.667 | 0.522 |
| 9300 | 0.429 | 0.908 | 0.764 | 0.391 | 0.667 | 0.522 |
| 9310 | 0.429 | 0.908 | 0.764 | 0.391 | 0.667 | 0.522 |
| 9320 | 0.429 | 0.908 | 0.764 | 0.391 | 0.667 | 0.522 |
| 9330 | 0.429 | 0.898 | 0.757 | 0.374 | 0.643 | 0.514 |
| 9340 | 0.429 | 0.908 | 0.764 | 0.391 | 0.667 | 0.522 |
| 9350 | 0.429 | 0.898 | 0.757 | 0.374 | 0.643 | 0.514 |
| 9360 | 0.429 | 0.898 | 0.757 | 0.374 | 0.643 | 0.514 |
| 9370 | 0.429 | 0.898 | 0.757 | 0.374 | 0.643 | 0.514 |
| 9380 | 0.429 | 0.898 | 0.757 | 0.374 | 0.643 | 0.514 |
| 9390 | 0.429 | 0.898 | 0.757 | 0.374 | 0.643 | 0.514 |
| 9400 | 0.429 | 0.898 | 0.757 | 0.374 | 0.643 | 0.514 |
| 9410 | 0.429 | 0.898 | 0.757 | 0.374 | 0.643 | 0.514 |
| 9420 | 0.429 | 0.898 | 0.757 | 0.374 | 0.643 | 0.514 |
| 9430 | 0.429 | 0.898 | 0.757 | 0.374 | 0.643 | 0.514 |
| 9440 | 0.429 | 0.898 | 0.757 | 0.374 | 0.643 | 0.514 |
| 9450 | 0.429 | 0.898 | 0.757 | 0.374 | 0.643 | 0.514 |
| 9460 | 0.429 | 0.898 | 0.757 | 0.374 | 0.643 | 0.514 |
| 9470 | 0.429 | 0.898 | 0.757 | 0.374 | 0.643 | 0.514 |
| 9480 | 0.429 | 0.898 | 0.757 | 0.374 | 0.643 | 0.514 |
| 9490 | 0.429 | 0.898 | 0.757 | 0.374 | 0.643 | 0.514 |
| 9500 | 0.429 | 0.898 | 0.757 | 0.374 | 0.643 | 0.514 |
| 9510 | 0.429 | 0.898 | 0.757 | 0.374 | 0.643 | 0.514 |
| 9520 | 0.429 | 0.898 | 0.757 | 0.374 | 0.643 | 0.514 |
| 9530 | 0.429 | 0.898 | 0.757 | 0.374 | 0.643 | 0.514 |

[illegible]

[illegible]

[illegible]

[illegible]

|       |       |       |       |       |       |       |
|-------|-------|-------|-------|-------|-------|-------|
| 11660 | 0.405 | 0.888 | 0.743 | 0.335 | 0.607 | 0.486 |
| 11670 | 0.405 | 0.888 | 0.743 | 0.335 | 0.607 | 0.486 |
| 11680 | 0.405 | 0.888 | 0.743 | 0.335 | 0.607 | 0.486 |
| 11690 | 0.405 | 0.888 | 0.743 | 0.335 | 0.607 | 0.486 |
| 11700 | 0.405 | 0.888 | 0.743 | 0.335 | 0.607 | 0.486 |
| 11710 | 0.405 | 0.888 | 0.743 | 0.335 | 0.607 | 0.486 |
| 11720 | 0.405 | 0.888 | 0.743 | 0.335 | 0.607 | 0.486 |
| 11730 | 0.405 | 0.888 | 0.743 | 0.335 | 0.607 | 0.486 |
| 11740 | 0.405 | 0.888 | 0.743 | 0.335 | 0.607 | 0.486 |
| 11750 | 0.405 | 0.888 | 0.743 | 0.335 | 0.607 | 0.486 |
| 11760 | 0.405 | 0.888 | 0.743 | 0.335 | 0.607 | 0.486 |
| 11770 | 0.405 | 0.888 | 0.743 | 0.335 | 0.607 | 0.486 |
| 11780 | 0.405 | 0.888 | 0.743 | 0.335 | 0.607 | 0.486 |
| 11790 | 0.405 | 0.888 | 0.743 | 0.335 | 0.607 | 0.486 |
| 11800 | 0.405 | 0.888 | 0.743 | 0.335 | 0.607 | 0.486 |
| 11810 | 0.405 | 0.888 | 0.743 | 0.335 | 0.607 | 0.486 |
| 11820 | 0.381 | 0.888 | 0.736 | 0.312 | 0.593 | 0.464 |
| 11830 | 0.381 | 0.888 | 0.736 | 0.312 | 0.593 | 0.464 |
| 11840 | 0.381 | 0.888 | 0.736 | 0.312 | 0.593 | 0.464 |
| 11850 | 0.405 | 0.888 | 0.743 | 0.335 | 0.607 | 0.486 |
| 11860 | 0.405 | 0.888 | 0.743 | 0.335 | 0.607 | 0.486 |
| 11870 | 0.405 | 0.888 | 0.743 | 0.335 | 0.607 | 0.486 |
| 11880 | 0.405 | 0.888 | 0.743 | 0.335 | 0.607 | 0.486 |
| 11890 | 0.405 | 0.888 | 0.743 | 0.335 | 0.607 | 0.486 |
| 11900 | 0.405 | 0.888 | 0.743 | 0.335 | 0.607 | 0.486 |
| 11910 | 0.405 | 0.888 | 0.743 | 0.335 | 0.607 | 0.486 |
| 11920 | 0.405 | 0.888 | 0.743 | 0.335 | 0.607 | 0.486 |
| 11930 | 0.405 | 0.888 | 0.743 | 0.335 | 0.607 | 0.486 |
| 11940 | 0.405 | 0.888 | 0.743 | 0.335 | 0.607 | 0.486 |
| 11950 | 0.405 | 0.888 | 0.743 | 0.335 | 0.607 | 0.486 |
| 11960 | 0.405 | 0.888 | 0.743 | 0.335 | 0.607 | 0.486 |
| 11970 | 0.405 | 0.888 | 0.743 | 0.335 | 0.607 | 0.486 |
| 11980 | 0.405 | 0.888 | 0.743 | 0.335 | 0.607 | 0.486 |
| 11990 | 0.405 | 0.878 | 0.736 | 0.319 | 0.586 | 0.479 |
| 12000 | 0.405 | 0.878 | 0.736 | 0.319 | 0.586 | 0.479 |
| 12010 | 0.405 | 0.878 | 0.736 | 0.319 | 0.586 | 0.479 |
| 12020 | 0.405 | 0.878 | 0.736 | 0.319 | 0.586 | 0.479 |
| 12030 | 0.405 | 0.878 | 0.736 | 0.319 | 0.586 | 0.479 |
| 12040 | 0.405 | 0.878 | 0.736 | 0.319 | 0.586 | 0.479 |
| 12050 | 0.405 | 0.888 | 0.743 | 0.335 | 0.607 | 0.486 |
| 12060 | 0.405 | 0.888 | 0.743 | 0.335 | 0.607 | 0.486 |
| 12070 | 0.405 | 0.878 | 0.736 | 0.319 | 0.586 | 0.479 |
| 12080 | 0.405 | 0.878 | 0.736 | 0.319 | 0.586 | 0.479 |
| 12090 | 0.405 | 0.888 | 0.743 | 0.335 | 0.607 | 0.486 |
| 12100 | 0.405 | 0.888 | 0.743 | 0.335 | 0.607 | 0.486 |
| 12110 | 0.405 | 0.878 | 0.736 | 0.319 | 0.586 | 0.479 |
| 12120 | 0.405 | 0.878 | 0.736 | 0.319 | 0.586 | 0.479 |
| 12130 | 0.405 | 0.878 | 0.736 | 0.319 | 0.586 | 0.479 |
| 12140 | 0.405 | 0.878 | 0.736 | 0.319 | 0.586 | 0.479 |
| 12150 | 0.405 | 0.878 | 0.736 | 0.319 | 0.586 | 0.479 |
| 12160 | 0.405 | 0.878 | 0.736 | 0.319 | 0.586 | 0.479 |
| 12170 | 0.405 | 0.878 | 0.736 | 0.319 | 0.586 | 0.479 |
| 12180 | 0.405 | 0.878 | 0.736 | 0.319 | 0.586 | 0.479 |

[illegible]

[illegible]

[illegible]

|       |       |       |       |       |       |       |
|-------|-------|-------|-------|-------|-------|-------|
| 13780 | 0.381 | 0.867 | 0.721 | 0.281 | 0.552 | 0.451 |
| 13790 | 0.381 | 0.867 | 0.721 | 0.281 | 0.552 | 0.451 |
| 13800 | 0.381 | 0.857 | 0.714 | 0.266 | 0.533 | 0.444 |
| 13810 | 0.381 | 0.857 | 0.714 | 0.266 | 0.533 | 0.444 |
| 13820 | 0.381 | 0.857 | 0.714 | 0.266 | 0.533 | 0.444 |
| 13830 | 0.381 | 0.857 | 0.714 | 0.266 | 0.533 | 0.444 |
| 13840 | 0.381 | 0.857 | 0.714 | 0.266 | 0.533 | 0.444 |
| 13850 | 0.381 | 0.857 | 0.714 | 0.266 | 0.533 | 0.444 |
| 13860 | 0.381 | 0.867 | 0.721 | 0.281 | 0.552 | 0.451 |
| 13870 | 0.381 | 0.867 | 0.721 | 0.281 | 0.552 | 0.451 |
| 13880 | 0.381 | 0.867 | 0.721 | 0.281 | 0.552 | 0.451 |
| 13890 | 0.381 | 0.867 | 0.721 | 0.281 | 0.552 | 0.451 |
| 13900 | 0.381 | 0.857 | 0.714 | 0.266 | 0.533 | 0.444 |
| 13910 | 0.381 | 0.857 | 0.714 | 0.266 | 0.533 | 0.444 |
| 13920 | 0.381 | 0.857 | 0.714 | 0.266 | 0.533 | 0.444 |
| 13930 | 0.381 | 0.857 | 0.714 | 0.266 | 0.533 | 0.444 |
| 13940 | 0.381 | 0.857 | 0.714 | 0.266 | 0.533 | 0.444 |
| 13950 | 0.381 | 0.857 | 0.714 | 0.266 | 0.533 | 0.444 |
| 13960 | 0.357 | 0.857 | 0.707 | 0.242 | 0.517 | 0.423 |
| 13970 | 0.357 | 0.857 | 0.707 | 0.242 | 0.517 | 0.423 |
| 13980 | 0.357 | 0.857 | 0.707 | 0.242 | 0.517 | 0.423 |
| 13990 | 0.333 | 0.857 | 0.700 | 0.218 | 0.500 | 0.400 |
| 14000 | 0.333 | 0.857 | 0.700 | 0.218 | 0.500 | 0.400 |
| 14010 | 0.357 | 0.857 | 0.707 | 0.242 | 0.517 | 0.423 |
| 14020 | 0.357 | 0.857 | 0.707 | 0.242 | 0.517 | 0.423 |
| 14030 | 0.333 | 0.857 | 0.700 | 0.218 | 0.500 | 0.400 |
| 14040 | 0.333 | 0.857 | 0.700 | 0.218 | 0.500 | 0.400 |
| 14050 | 0.333 | 0.857 | 0.700 | 0.218 | 0.500 | 0.400 |
| 14060 | 0.357 | 0.857 | 0.707 | 0.242 | 0.517 | 0.423 |
| 14070 | 0.333 | 0.857 | 0.700 | 0.218 | 0.500 | 0.400 |
| 14080 | 0.357 | 0.857 | 0.707 | 0.242 | 0.517 | 0.423 |
| 14090 | 0.357 | 0.857 | 0.707 | 0.242 | 0.517 | 0.423 |
| 14100 | 0.333 | 0.857 | 0.700 | 0.218 | 0.500 | 0.400 |
| 14110 | 0.333 | 0.857 | 0.700 | 0.218 | 0.500 | 0.400 |
| 14120 | 0.333 | 0.857 | 0.700 | 0.218 | 0.500 | 0.400 |
| 14130 | 0.333 | 0.857 | 0.700 | 0.218 | 0.500 | 0.400 |
| 14140 | 0.333 | 0.857 | 0.700 | 0.218 | 0.500 | 0.400 |
| 14150 | 0.333 | 0.857 | 0.700 | 0.218 | 0.500 | 0.400 |
| 14160 | 0.333 | 0.857 | 0.700 | 0.218 | 0.500 | 0.400 |
| 14170 | 0.333 | 0.857 | 0.700 | 0.218 | 0.500 | 0.400 |
| 14180 | 0.333 | 0.857 | 0.700 | 0.218 | 0.500 | 0.400 |
| 14190 | 0.333 | 0.857 | 0.700 | 0.218 | 0.500 | 0.400 |
| 14200 | 0.357 | 0.857 | 0.707 | 0.242 | 0.517 | 0.423 |
| 14210 | 0.357 | 0.867 | 0.714 | 0.257 | 0.536 | 0.429 |
| 14220 | 0.357 | 0.857 | 0.707 | 0.242 | 0.517 | 0.423 |
| 14230 | 0.357 | 0.857 | 0.707 | 0.242 | 0.517 | 0.423 |
| 14240 | 0.333 | 0.857 | 0.700 | 0.218 | 0.500 | 0.400 |
| 14250 | 0.357 | 0.857 | 0.707 | 0.242 | 0.517 | 0.423 |
| 14260 | 0.333 | 0.857 | 0.700 | 0.218 | 0.500 | 0.400 |
| 14270 | 0.357 | 0.857 | 0.707 | 0.242 | 0.517 | 0.423 |
| 14280 | 0.310 | 0.857 | 0.693 | 0.194 | 0.481 | 0.377 |
| 14290 | 0.310 | 0.857 | 0.693 | 0.194 | 0.481 | 0.377 |
| 14300 | 0.333 | 0.857 | 0.700 | 0.218 | 0.500 | 0.400 |

|       |       |       |       |       |       |       |
|-------|-------|-------|-------|-------|-------|-------|
| 14310 | 0.333 | 0.857 | 0.700 | 0.218 | 0.500 | 0.400 |
| 14320 | 0.310 | 0.857 | 0.693 | 0.194 | 0.481 | 0.377 |
| 14330 | 0.310 | 0.857 | 0.693 | 0.194 | 0.481 | 0.377 |
| 14340 | 0.310 | 0.857 | 0.693 | 0.194 | 0.481 | 0.377 |
| 14350 | 0.310 | 0.857 | 0.693 | 0.194 | 0.481 | 0.377 |
| 14360 | 0.310 | 0.857 | 0.693 | 0.194 | 0.481 | 0.377 |
| 14370 | 0.310 | 0.857 | 0.693 | 0.194 | 0.481 | 0.377 |
| 14380 | 0.310 | 0.857 | 0.693 | 0.194 | 0.481 | 0.377 |
| 14390 | 0.286 | 0.857 | 0.686 | 0.168 | 0.462 | 0.353 |
| 14400 | 0.310 | 0.857 | 0.693 | 0.194 | 0.481 | 0.377 |
| 14410 | 0.310 | 0.857 | 0.693 | 0.194 | 0.481 | 0.377 |
| 14420 | 0.286 | 0.857 | 0.686 | 0.168 | 0.462 | 0.353 |
| 14430 | 0.286 | 0.857 | 0.686 | 0.168 | 0.462 | 0.353 |
| 14440 | 0.286 | 0.857 | 0.686 | 0.168 | 0.462 | 0.353 |
| 14450 | 0.286 | 0.857 | 0.686 | 0.168 | 0.462 | 0.353 |
| 14460 | 0.286 | 0.857 | 0.686 | 0.168 | 0.462 | 0.353 |
| 14470 | 0.286 | 0.857 | 0.686 | 0.168 | 0.462 | 0.353 |
| 14480 | 0.286 | 0.857 | 0.686 | 0.168 | 0.462 | 0.353 |
| 14490 | 0.286 | 0.857 | 0.686 | 0.168 | 0.462 | 0.353 |
| 14500 | 0.286 | 0.857 | 0.686 | 0.168 | 0.462 | 0.353 |
| 14510 | 0.286 | 0.857 | 0.686 | 0.168 | 0.462 | 0.353 |
| 14520 | 0.286 | 0.857 | 0.686 | 0.168 | 0.462 | 0.353 |
| 14530 | 0.286 | 0.857 | 0.686 | 0.168 | 0.462 | 0.353 |
| 14540 | 0.262 | 0.857 | 0.679 | 0.142 | 0.440 | 0.328 |
| 14550 | 0.262 | 0.857 | 0.679 | 0.142 | 0.440 | 0.328 |
| 14560 | 0.262 | 0.857 | 0.679 | 0.142 | 0.440 | 0.328 |
| 14570 | 0.262 | 0.857 | 0.679 | 0.142 | 0.440 | 0.328 |
| 14580 | 0.262 | 0.857 | 0.679 | 0.142 | 0.440 | 0.328 |
| 14590 | 0.262 | 0.857 | 0.679 | 0.142 | 0.440 | 0.328 |
| 14600 | 0.262 | 0.857 | 0.679 | 0.142 | 0.440 | 0.328 |
| 14610 | 0.262 | 0.857 | 0.679 | 0.142 | 0.440 | 0.328 |
| 14620 | 0.262 | 0.857 | 0.679 | 0.142 | 0.440 | 0.328 |
| 14630 | 0.262 | 0.857 | 0.679 | 0.142 | 0.440 | 0.328 |
| 14640 | 0.262 | 0.857 | 0.679 | 0.142 | 0.440 | 0.328 |
| 14650 | 0.262 | 0.857 | 0.679 | 0.142 | 0.440 | 0.328 |
| 14660 | 0.286 | 0.857 | 0.686 | 0.168 | 0.462 | 0.353 |
| 14670 | 0.238 | 0.857 | 0.671 | 0.116 | 0.417 | 0.303 |
| 14680 | 0.238 | 0.857 | 0.671 | 0.116 | 0.417 | 0.303 |
| 14690 | 0.238 | 0.857 | 0.671 | 0.116 | 0.417 | 0.303 |
| 14700 | 0.238 | 0.857 | 0.671 | 0.116 | 0.417 | 0.303 |
| 14710 | 0.262 | 0.857 | 0.679 | 0.142 | 0.440 | 0.328 |
| 14720 | 0.262 | 0.857 | 0.679 | 0.142 | 0.440 | 0.328 |
| 14730 | 0.238 | 0.857 | 0.671 | 0.116 | 0.417 | 0.303 |
| 14740 | 0.238 | 0.857 | 0.671 | 0.116 | 0.417 | 0.303 |
| 14750 | 0.238 | 0.857 | 0.671 | 0.116 | 0.417 | 0.303 |
| 14760 | 0.238 | 0.857 | 0.671 | 0.116 | 0.417 | 0.303 |
| 14770 | 0.262 | 0.857 | 0.679 | 0.142 | 0.440 | 0.328 |
| 14780 | 0.238 | 0.857 | 0.671 | 0.116 | 0.417 | 0.303 |
| 14790 | 0.238 | 0.857 | 0.671 | 0.116 | 0.417 | 0.303 |
| 14800 | 0.238 | 0.857 | 0.671 | 0.116 | 0.417 | 0.303 |
| 14810 | 0.238 | 0.857 | 0.671 | 0.116 | 0.417 | 0.303 |
| 14820 | 0.238 | 0.857 | 0.671 | 0.116 | 0.417 | 0.303 |
| 14830 | 0.238 | 0.857 | 0.671 | 0.116 | 0.417 | 0.303 |

|       |       |       |       |       |       |       |
|-------|-------|-------|-------|-------|-------|-------|
| 14840 | 0.238 | 0.857 | 0.671 | 0.116 | 0.417 | 0.303 |
| 14850 | 0.238 | 0.857 | 0.671 | 0.116 | 0.417 | 0.303 |
| 14860 | 0.238 | 0.857 | 0.671 | 0.116 | 0.417 | 0.303 |
| 14870 | 0.238 | 0.857 | 0.671 | 0.116 | 0.417 | 0.303 |
| 14880 | 0.238 | 0.857 | 0.671 | 0.116 | 0.417 | 0.303 |
| 14890 | 0.238 | 0.857 | 0.671 | 0.116 | 0.417 | 0.303 |
| 14900 | 0.238 | 0.857 | 0.671 | 0.116 | 0.417 | 0.303 |
| 14910 | 0.238 | 0.857 | 0.671 | 0.116 | 0.417 | 0.303 |
| 14920 | 0.238 | 0.857 | 0.671 | 0.116 | 0.417 | 0.303 |
| 14930 | 0.238 | 0.857 | 0.671 | 0.116 | 0.417 | 0.303 |
| 14940 | 0.238 | 0.857 | 0.671 | 0.116 | 0.417 | 0.303 |
| 14950 | 0.238 | 0.857 | 0.671 | 0.116 | 0.417 | 0.303 |
| 14960 | 0.238 | 0.857 | 0.671 | 0.116 | 0.417 | 0.303 |
| 14970 | 0.238 | 0.857 | 0.671 | 0.116 | 0.417 | 0.303 |
| 14980 | 0.238 | 0.857 | 0.671 | 0.116 | 0.417 | 0.303 |
| 14990 | 0.238 | 0.857 | 0.671 | 0.116 | 0.417 | 0.303 |
| 15000 | 0.238 | 0.847 | 0.664 | 0.102 | 0.400 | 0.299 |
| 15010 | 0.238 | 0.847 | 0.664 | 0.102 | 0.400 | 0.299 |
| 15020 | 0.238 | 0.847 | 0.664 | 0.102 | 0.400 | 0.299 |
| 15030 | 0.238 | 0.847 | 0.664 | 0.102 | 0.400 | 0.299 |
| 15040 | 0.238 | 0.847 | 0.664 | 0.102 | 0.400 | 0.299 |
| 15050 | 0.238 | 0.847 | 0.664 | 0.102 | 0.400 | 0.299 |
| 15060 | 0.238 | 0.847 | 0.664 | 0.102 | 0.400 | 0.299 |
| 15070 | 0.238 | 0.847 | 0.664 | 0.102 | 0.400 | 0.299 |
| 15080 | 0.238 | 0.847 | 0.664 | 0.102 | 0.400 | 0.299 |
| 15090 | 0.238 | 0.847 | 0.664 | 0.102 | 0.400 | 0.299 |
| 15100 | 0.238 | 0.847 | 0.664 | 0.102 | 0.400 | 0.299 |
| 15110 | 0.262 | 0.847 | 0.671 | 0.128 | 0.423 | 0.324 |
| 15120 | 0.238 | 0.847 | 0.664 | 0.102 | 0.400 | 0.299 |
| 15130 | 0.238 | 0.847 | 0.664 | 0.102 | 0.400 | 0.299 |
| 15140 | 0.238 | 0.847 | 0.664 | 0.102 | 0.400 | 0.299 |
| 15150 | 0.238 | 0.857 | 0.671 | 0.116 | 0.417 | 0.303 |
| 15160 | 0.238 | 0.857 | 0.671 | 0.116 | 0.417 | 0.303 |
| 15170 | 0.238 | 0.857 | 0.671 | 0.116 | 0.417 | 0.303 |
| 15180 | 0.238 | 0.857 | 0.671 | 0.116 | 0.417 | 0.303 |
| 15190 | 0.238 | 0.857 | 0.671 | 0.116 | 0.417 | 0.303 |
| 15200 | 0.238 | 0.847 | 0.664 | 0.102 | 0.400 | 0.299 |
| 15210 | 0.238 | 0.847 | 0.664 | 0.102 | 0.400 | 0.299 |
| 15220 | 0.238 | 0.847 | 0.664 | 0.102 | 0.400 | 0.299 |
| 15230 | 0.238 | 0.847 | 0.664 | 0.102 | 0.400 | 0.299 |
| 15240 | 0.238 | 0.857 | 0.671 | 0.116 | 0.417 | 0.303 |
| 15250 | 0.238 | 0.857 | 0.671 | 0.116 | 0.417 | 0.303 |
| 15260 | 0.238 | 0.857 | 0.671 | 0.116 | 0.417 | 0.303 |
| 15270 | 0.262 | 0.857 | 0.679 | 0.142 | 0.440 | 0.328 |
| 15280 | 0.262 | 0.857 | 0.679 | 0.142 | 0.440 | 0.328 |
| 15290 | 0.238 | 0.857 | 0.671 | 0.116 | 0.417 | 0.303 |
| 15300 | 0.262 | 0.857 | 0.679 | 0.142 | 0.440 | 0.328 |
| 15310 | 0.238 | 0.857 | 0.671 | 0.116 | 0.417 | 0.303 |
| 15320 | 0.238 | 0.857 | 0.671 | 0.116 | 0.417 | 0.303 |
| 15330 | 0.238 | 0.857 | 0.671 | 0.116 | 0.417 | 0.303 |
| 15340 | 0.238 | 0.857 | 0.671 | 0.116 | 0.417 | 0.303 |
| 15350 | 0.238 | 0.857 | 0.671 | 0.116 | 0.417 | 0.303 |
| 15360 | 0.238 | 0.857 | 0.671 | 0.116 | 0.417 | 0.303 |

|       |       |       |       |       |       |       |
|-------|-------|-------|-------|-------|-------|-------|
| 15370 | 0.238 | 0.857 | 0.671 | 0.116 | 0.417 | 0.303 |
| 15380 | 0.238 | 0.857 | 0.671 | 0.116 | 0.417 | 0.303 |
| 15390 | 0.262 | 0.857 | 0.679 | 0.142 | 0.440 | 0.328 |
| 15400 | 0.262 | 0.857 | 0.679 | 0.142 | 0.440 | 0.328 |
| 15410 | 0.262 | 0.857 | 0.679 | 0.142 | 0.440 | 0.328 |
| 15420 | 0.262 | 0.857 | 0.679 | 0.142 | 0.440 | 0.328 |
| 15430 | 0.262 | 0.857 | 0.679 | 0.142 | 0.440 | 0.328 |
| 15440 | 0.262 | 0.857 | 0.679 | 0.142 | 0.440 | 0.328 |
| 15450 | 0.262 | 0.857 | 0.679 | 0.142 | 0.440 | 0.328 |
| 15460 | 0.238 | 0.857 | 0.671 | 0.116 | 0.417 | 0.303 |
| 15470 | 0.238 | 0.857 | 0.671 | 0.116 | 0.417 | 0.303 |
| 15480 | 0.238 | 0.857 | 0.671 | 0.116 | 0.417 | 0.303 |
| 15490 | 0.238 | 0.857 | 0.671 | 0.116 | 0.417 | 0.303 |
| 15500 | 0.238 | 0.857 | 0.671 | 0.116 | 0.417 | 0.303 |
| 15510 | 0.262 | 0.857 | 0.679 | 0.142 | 0.440 | 0.328 |
| 15520 | 0.238 | 0.857 | 0.671 | 0.116 | 0.417 | 0.303 |
| 15530 | 0.238 | 0.857 | 0.671 | 0.116 | 0.417 | 0.303 |
| 15540 | 0.238 | 0.857 | 0.671 | 0.116 | 0.417 | 0.303 |
| 15550 | 0.238 | 0.857 | 0.671 | 0.116 | 0.417 | 0.303 |
| 15560 | 0.238 | 0.857 | 0.671 | 0.116 | 0.417 | 0.303 |
| 15570 | 0.214 | 0.857 | 0.664 | 0.088 | 0.391 | 0.277 |
| 15580 | 0.214 | 0.857 | 0.664 | 0.088 | 0.391 | 0.277 |
| 15590 | 0.214 | 0.857 | 0.664 | 0.088 | 0.391 | 0.277 |
| 15600 | 0.238 | 0.857 | 0.671 | 0.116 | 0.417 | 0.303 |
| 15610 | 0.238 | 0.857 | 0.671 | 0.116 | 0.417 | 0.303 |
| 15620 | 0.238 | 0.857 | 0.671 | 0.116 | 0.417 | 0.303 |
| 15630 | 0.238 | 0.857 | 0.671 | 0.116 | 0.417 | 0.303 |
| 15640 | 0.238 | 0.857 | 0.671 | 0.116 | 0.417 | 0.303 |
| 15650 | 0.214 | 0.857 | 0.664 | 0.088 | 0.391 | 0.277 |
| 15660 | 0.238 | 0.857 | 0.671 | 0.116 | 0.417 | 0.303 |
| 15670 | 0.214 | 0.857 | 0.664 | 0.088 | 0.391 | 0.277 |
| 15680 | 0.238 | 0.857 | 0.671 | 0.116 | 0.417 | 0.303 |
| 15690 | 0.214 | 0.857 | 0.664 | 0.088 | 0.391 | 0.277 |
| 15700 | 0.214 | 0.857 | 0.664 | 0.088 | 0.391 | 0.277 |
| 15710 | 0.214 | 0.857 | 0.664 | 0.088 | 0.391 | 0.277 |
| 15720 | 0.214 | 0.857 | 0.664 | 0.088 | 0.391 | 0.277 |
| 15730 | 0.214 | 0.857 | 0.664 | 0.088 | 0.391 | 0.277 |
| 15740 | 0.214 | 0.857 | 0.664 | 0.088 | 0.391 | 0.277 |
| 15750 | 0.214 | 0.857 | 0.664 | 0.088 | 0.391 | 0.277 |
| 15760 | 0.214 | 0.857 | 0.664 | 0.088 | 0.391 | 0.277 |
| 15770 | 0.214 | 0.857 | 0.664 | 0.088 | 0.391 | 0.277 |
| 15780 | 0.214 | 0.857 | 0.664 | 0.088 | 0.391 | 0.277 |
| 15790 | 0.214 | 0.847 | 0.657 | 0.074 | 0.375 | 0.273 |
| 15800 | 0.214 | 0.847 | 0.657 | 0.074 | 0.375 | 0.273 |
| 15810 | 0.214 | 0.847 | 0.657 | 0.074 | 0.375 | 0.273 |
| 15820 | 0.214 | 0.857 | 0.664 | 0.088 | 0.391 | 0.277 |
| 15830 | 0.214 | 0.857 | 0.664 | 0.088 | 0.391 | 0.277 |
| 15840 | 0.214 | 0.857 | 0.664 | 0.088 | 0.391 | 0.277 |
| 15850 | 0.214 | 0.857 | 0.664 | 0.088 | 0.391 | 0.277 |
| 15860 | 0.214 | 0.857 | 0.664 | 0.088 | 0.391 | 0.277 |
| 15870 | 0.214 | 0.857 | 0.664 | 0.088 | 0.391 | 0.277 |
| 15880 | 0.214 | 0.857 | 0.664 | 0.088 | 0.391 | 0.277 |
| 15890 | 0.214 | 0.857 | 0.664 | 0.088 | 0.391 | 0.277 |

[illegible]

|       |       |       |       |       |       |       |
|-------|-------|-------|-------|-------|-------|-------|
| 16430 | 0.214 | 0.837 | 0.650 | 0.061 | 0.360 | 0.269 |
| 16440 | 0.214 | 0.837 | 0.650 | 0.061 | 0.360 | 0.269 |
| 16450 | 0.214 | 0.837 | 0.650 | 0.061 | 0.360 | 0.269 |
| 16460 | 0.214 | 0.847 | 0.657 | 0.074 | 0.375 | 0.273 |
| 16470 | 0.214 | 0.847 | 0.657 | 0.074 | 0.375 | 0.273 |
| 16480 | 0.214 | 0.847 | 0.657 | 0.074 | 0.375 | 0.273 |
| 16490 | 0.214 | 0.847 | 0.657 | 0.074 | 0.375 | 0.273 |
| 16500 | 0.214 | 0.837 | 0.650 | 0.061 | 0.360 | 0.269 |
| 16510 | 0.214 | 0.837 | 0.650 | 0.061 | 0.360 | 0.269 |
| 16520 | 0.214 | 0.837 | 0.650 | 0.061 | 0.360 | 0.269 |
| 16530 | 0.214 | 0.837 | 0.650 | 0.061 | 0.360 | 0.269 |
| 16540 | 0.214 | 0.837 | 0.650 | 0.061 | 0.360 | 0.269 |
| 16550 | 0.214 | 0.847 | 0.657 | 0.074 | 0.375 | 0.273 |
| 16560 | 0.214 | 0.837 | 0.650 | 0.061 | 0.360 | 0.269 |
| 16570 | 0.214 | 0.837 | 0.650 | 0.061 | 0.360 | 0.269 |
| 16580 | 0.214 | 0.837 | 0.650 | 0.061 | 0.360 | 0.269 |
| 16590 | 0.214 | 0.837 | 0.650 | 0.061 | 0.360 | 0.269 |
| 16600 | 0.214 | 0.847 | 0.657 | 0.074 | 0.375 | 0.273 |
| 16610 | 0.214 | 0.847 | 0.657 | 0.074 | 0.375 | 0.273 |
| 16620 | 0.214 | 0.847 | 0.657 | 0.074 | 0.375 | 0.273 |
| 16630 | 0.214 | 0.847 | 0.657 | 0.074 | 0.375 | 0.273 |
| 16640 | 0.214 | 0.847 | 0.657 | 0.074 | 0.375 | 0.273 |
| 16650 | 0.214 | 0.847 | 0.657 | 0.074 | 0.375 | 0.273 |
| 16660 | 0.214 | 0.847 | 0.657 | 0.074 | 0.375 | 0.273 |
| 16670 | 0.214 | 0.847 | 0.657 | 0.074 | 0.375 | 0.273 |
| 16680 | 0.214 | 0.847 | 0.657 | 0.074 | 0.375 | 0.273 |
| 16690 | 0.214 | 0.847 | 0.657 | 0.074 | 0.375 | 0.273 |
| 16700 | 0.214 | 0.847 | 0.657 | 0.074 | 0.375 | 0.273 |
| 16710 | 0.214 | 0.847 | 0.657 | 0.074 | 0.375 | 0.273 |
| 16720 | 0.214 | 0.847 | 0.657 | 0.074 | 0.375 | 0.273 |
| 16730 | 0.214 | 0.847 | 0.657 | 0.074 | 0.375 | 0.273 |
| 16740 | 0.214 | 0.847 | 0.657 | 0.074 | 0.375 | 0.273 |
| 16750 | 0.214 | 0.837 | 0.650 | 0.061 | 0.360 | 0.269 |
| 16760 | 0.214 | 0.837 | 0.650 | 0.061 | 0.360 | 0.269 |
| 16770 | 0.214 | 0.837 | 0.650 | 0.061 | 0.360 | 0.269 |
| 16780 | 0.214 | 0.837 | 0.650 | 0.061 | 0.360 | 0.269 |
| 16790 | 0.214 | 0.847 | 0.657 | 0.074 | 0.375 | 0.273 |
| 16800 | 0.214 | 0.837 | 0.650 | 0.061 | 0.360 | 0.269 |
| 16810 | 0.214 | 0.847 | 0.657 | 0.074 | 0.375 | 0.273 |
| 16820 | 0.214 | 0.837 | 0.650 | 0.061 | 0.360 | 0.269 |
| 16830 | 0.214 | 0.847 | 0.657 | 0.074 | 0.375 | 0.273 |
| 16840 | 0.214 | 0.847 | 0.657 | 0.074 | 0.375 | 0.273 |
| 16850 | 0.190 | 0.837 | 0.643 | 0.033 | 0.333 | 0.242 |
| 16860 | 0.190 | 0.847 | 0.650 | 0.046 | 0.348 | 0.246 |
| 16870 | 0.190 | 0.837 | 0.643 | 0.033 | 0.333 | 0.242 |
| 16880 | 0.190 | 0.847 | 0.650 | 0.046 | 0.348 | 0.246 |
| 16890 | 0.190 | 0.837 | 0.643 | 0.033 | 0.333 | 0.242 |
| 16900 | 0.190 | 0.837 | 0.643 | 0.033 | 0.333 | 0.242 |
| 16910 | 0.190 | 0.837 | 0.643 | 0.033 | 0.333 | 0.242 |
| 16920 | 0.190 | 0.837 | 0.643 | 0.033 | 0.333 | 0.242 |
| 16930 | 0.214 | 0.837 | 0.650 | 0.061 | 0.360 | 0.269 |
| 16940 | 0.214 | 0.837 | 0.650 | 0.061 | 0.360 | 0.269 |
| 16950 | 0.214 | 0.837 | 0.650 | 0.061 | 0.360 | 0.269 |

[illegible]

[illegible]

[illegible]

|       |       |       |       |        |       |       |
|-------|-------|-------|-------|--------|-------|-------|
| 18550 | 0.167 | 0.827 | 0.629 | -0.008 | 0.292 | 0.212 |
| 18560 | 0.167 | 0.827 | 0.629 | -0.008 | 0.292 | 0.212 |
| 18570 | 0.190 | 0.827 | 0.636 | 0.020  | 0.320 | 0.239 |
| 18580 | 0.167 | 0.827 | 0.629 | -0.008 | 0.292 | 0.212 |
| 18590 | 0.167 | 0.827 | 0.629 | -0.008 | 0.292 | 0.212 |
| 18600 | 0.190 | 0.827 | 0.636 | 0.020  | 0.320 | 0.239 |
| 18610 | 0.167 | 0.827 | 0.629 | -0.008 | 0.292 | 0.212 |
| 18620 | 0.190 | 0.827 | 0.636 | 0.020  | 0.320 | 0.239 |
| 18630 | 0.190 | 0.827 | 0.636 | 0.020  | 0.320 | 0.239 |
| 18640 | 0.190 | 0.827 | 0.636 | 0.020  | 0.320 | 0.239 |
| 18650 | 0.190 | 0.827 | 0.636 | 0.020  | 0.320 | 0.239 |
| 18660 | 0.190 | 0.827 | 0.636 | 0.020  | 0.320 | 0.239 |
| 18670 | 0.167 | 0.827 | 0.629 | -0.008 | 0.292 | 0.212 |
| 18680 | 0.167 | 0.827 | 0.629 | -0.008 | 0.292 | 0.212 |
| 18690 | 0.167 | 0.827 | 0.629 | -0.008 | 0.292 | 0.212 |
| 18700 | 0.167 | 0.827 | 0.629 | -0.008 | 0.292 | 0.212 |
| 18710 | 0.167 | 0.827 | 0.629 | -0.008 | 0.292 | 0.212 |
| 18720 | 0.167 | 0.827 | 0.629 | -0.008 | 0.292 | 0.212 |
| 18730 | 0.167 | 0.827 | 0.629 | -0.008 | 0.292 | 0.212 |
| 18740 | 0.167 | 0.827 | 0.629 | -0.008 | 0.292 | 0.212 |
| 18750 | 0.167 | 0.827 | 0.629 | -0.008 | 0.292 | 0.212 |
| 18760 | 0.167 | 0.827 | 0.629 | -0.008 | 0.292 | 0.212 |
| 18770 | 0.167 | 0.827 | 0.629 | -0.008 | 0.292 | 0.212 |
| 18780 | 0.167 | 0.827 | 0.629 | -0.008 | 0.292 | 0.212 |
| 18790 | 0.167 | 0.827 | 0.629 | -0.008 | 0.292 | 0.212 |
| 18800 | 0.167 | 0.827 | 0.629 | -0.008 | 0.292 | 0.212 |
| 18810 | 0.167 | 0.837 | 0.636 | 0.004  | 0.304 | 0.215 |
| 18820 | 0.167 | 0.837 | 0.636 | 0.004  | 0.304 | 0.215 |
| 18830 | 0.167 | 0.827 | 0.629 | -0.008 | 0.292 | 0.212 |
| 18840 | 0.167 | 0.827 | 0.629 | -0.008 | 0.292 | 0.212 |
| 18850 | 0.167 | 0.827 | 0.629 | -0.008 | 0.292 | 0.212 |
| 18860 | 0.167 | 0.837 | 0.636 | 0.004  | 0.304 | 0.215 |
| 18870 | 0.167 | 0.837 | 0.636 | 0.004  | 0.304 | 0.215 |
| 18880 | 0.167 | 0.837 | 0.636 | 0.004  | 0.304 | 0.215 |
| 18890 | 0.167 | 0.837 | 0.636 | 0.004  | 0.304 | 0.215 |
| 18900 | 0.167 | 0.837 | 0.636 | 0.004  | 0.304 | 0.215 |
| 18910 | 0.167 | 0.837 | 0.636 | 0.004  | 0.304 | 0.215 |
| 18920 | 0.167 | 0.827 | 0.629 | -0.008 | 0.292 | 0.212 |
| 18930 | 0.167 | 0.827 | 0.629 | -0.008 | 0.292 | 0.212 |
| 18940 | 0.167 | 0.827 | 0.629 | -0.008 | 0.292 | 0.212 |
| 18950 | 0.167 | 0.827 | 0.629 | -0.008 | 0.292 | 0.212 |
| 18960 | 0.167 | 0.827 | 0.629 | -0.008 | 0.292 | 0.212 |
| 18970 | 0.167 | 0.827 | 0.629 | -0.008 | 0.292 | 0.212 |
| 18980 | 0.167 | 0.827 | 0.629 | -0.008 | 0.292 | 0.212 |
| 18990 | 0.167 | 0.827 | 0.629 | -0.008 | 0.292 | 0.212 |
| 19000 | 0.167 | 0.827 | 0.629 | -0.008 | 0.292 | 0.212 |
| 19010 | 0.167 | 0.827 | 0.629 | -0.008 | 0.292 | 0.212 |
| 19020 | 0.167 | 0.827 | 0.629 | -0.008 | 0.292 | 0.212 |
| 19030 | 0.167 | 0.827 | 0.629 | -0.008 | 0.292 | 0.212 |
| 19040 | 0.167 | 0.827 | 0.629 | -0.008 | 0.292 | 0.212 |
| 19050 | 0.167 | 0.827 | 0.629 | -0.008 | 0.292 | 0.212 |
| 19060 | 0.167 | 0.827 | 0.629 | -0.008 | 0.292 | 0.212 |
| 19070 | 0.167 | 0.827 | 0.629 | -0.008 | 0.292 | 0.212 |

|       |       |       |       |        |       |       |
|-------|-------|-------|-------|--------|-------|-------|
| 19080 | 0.167 | 0.827 | 0.629 | -0.008 | 0.292 | 0.212 |
| 19090 | 0.167 | 0.827 | 0.629 | -0.008 | 0.292 | 0.212 |
| 19100 | 0.167 | 0.827 | 0.629 | -0.008 | 0.292 | 0.212 |
| 19110 | 0.167 | 0.827 | 0.629 | -0.008 | 0.292 | 0.212 |
| 19120 | 0.167 | 0.827 | 0.629 | -0.008 | 0.292 | 0.212 |
| 19130 | 0.167 | 0.827 | 0.629 | -0.008 | 0.292 | 0.212 |
| 19140 | 0.167 | 0.827 | 0.629 | -0.008 | 0.292 | 0.212 |
| 19150 | 0.167 | 0.827 | 0.629 | -0.008 | 0.292 | 0.212 |
| 19160 | 0.167 | 0.827 | 0.629 | -0.008 | 0.292 | 0.212 |
| 19170 | 0.167 | 0.827 | 0.629 | -0.008 | 0.292 | 0.212 |
| 19180 | 0.167 | 0.827 | 0.629 | -0.008 | 0.292 | 0.212 |
| 19190 | 0.167 | 0.827 | 0.629 | -0.008 | 0.292 | 0.212 |
| 19200 | 0.167 | 0.827 | 0.629 | -0.008 | 0.292 | 0.212 |
| 19210 | 0.167 | 0.827 | 0.629 | -0.008 | 0.292 | 0.212 |
| 19220 | 0.167 | 0.827 | 0.629 | -0.008 | 0.292 | 0.212 |
| 19230 | 0.167 | 0.827 | 0.629 | -0.008 | 0.292 | 0.212 |
| 19240 | 0.167 | 0.827 | 0.629 | -0.008 | 0.292 | 0.212 |
| 19250 | 0.167 | 0.827 | 0.629 | -0.008 | 0.292 | 0.212 |
| 19260 | 0.167 | 0.827 | 0.629 | -0.008 | 0.292 | 0.212 |
| 19270 | 0.167 | 0.827 | 0.629 | -0.008 | 0.292 | 0.212 |
| 19280 | 0.167 | 0.827 | 0.629 | -0.008 | 0.292 | 0.212 |
| 19290 | 0.167 | 0.827 | 0.629 | -0.008 | 0.292 | 0.212 |
| 19300 | 0.167 | 0.827 | 0.629 | -0.008 | 0.292 | 0.212 |
| 19310 | 0.167 | 0.827 | 0.629 | -0.008 | 0.292 | 0.212 |
| 19320 | 0.167 | 0.827 | 0.629 | -0.008 | 0.292 | 0.212 |
| 19330 | 0.167 | 0.827 | 0.629 | -0.008 | 0.292 | 0.212 |
| 19340 | 0.167 | 0.827 | 0.629 | -0.008 | 0.292 | 0.212 |
| 19350 | 0.167 | 0.827 | 0.629 | -0.008 | 0.292 | 0.212 |
| 19360 | 0.167 | 0.827 | 0.629 | -0.008 | 0.292 | 0.212 |
| 19370 | 0.190 | 0.827 | 0.636 | 0.020  | 0.320 | 0.239 |
| 19380 | 0.167 | 0.827 | 0.629 | -0.008 | 0.292 | 0.212 |
| 19390 | 0.167 | 0.827 | 0.629 | -0.008 | 0.292 | 0.212 |
| 19400 | 0.167 | 0.827 | 0.629 | -0.008 | 0.292 | 0.212 |
| 19410 | 0.167 | 0.827 | 0.629 | -0.008 | 0.292 | 0.212 |
| 19420 | 0.167 | 0.827 | 0.629 | -0.008 | 0.292 | 0.212 |
| 19430 | 0.167 | 0.827 | 0.629 | -0.008 | 0.292 | 0.212 |
| 19440 | 0.167 | 0.827 | 0.629 | -0.008 | 0.292 | 0.212 |
| 19450 | 0.167 | 0.827 | 0.629 | -0.008 | 0.292 | 0.212 |
| 19460 | 0.167 | 0.827 | 0.629 | -0.008 | 0.292 | 0.212 |
| 19470 | 0.167 | 0.827 | 0.629 | -0.008 | 0.292 | 0.212 |
| 19480 | 0.167 | 0.827 | 0.629 | -0.008 | 0.292 | 0.212 |
| 19490 | 0.167 | 0.827 | 0.629 | -0.008 | 0.292 | 0.212 |
| 19500 | 0.167 | 0.827 | 0.629 | -0.008 | 0.292 | 0.212 |
| 19510 | 0.167 | 0.827 | 0.629 | -0.008 | 0.292 | 0.212 |
| 19520 | 0.167 | 0.827 | 0.629 | -0.008 | 0.292 | 0.212 |
| 19530 | 0.167 | 0.827 | 0.629 | -0.008 | 0.292 | 0.212 |
| 19540 | 0.167 | 0.827 | 0.629 | -0.008 | 0.292 | 0.212 |
| 19550 | 0.167 | 0.827 | 0.629 | -0.008 | 0.292 | 0.212 |
| 19560 | 0.167 | 0.827 | 0.629 | -0.008 | 0.292 | 0.212 |
| 19570 | 0.167 | 0.827 | 0.629 | -0.008 | 0.292 | 0.212 |
| 19580 | 0.143 | 0.827 | 0.621 | -0.038 | 0.261 | 0.185 |
| 19590 | 0.143 | 0.827 | 0.621 | -0.038 | 0.261 | 0.185 |
